# Supplementary material for: Identification and Immunocorrelation of Prognosis-Related Genes Associated With Development of Muscle-Invasive Bladder Cancer
Source: Front Mol Biosci. 2021 Jan 29;7:598599. doi: 10.3389/fmolb.2020.598599 (PMC7884823; doi:10.3389/fmolb.2020.598599)
Supplement: Supplementary file 2 [file table1.xls]

## Sheet: Table S1
Table S1. Correlation between the prognosis-related genes and hallmark-related cancer pathways.
Gene	Hallmark pathways	PCC	P-value	Correlation
ATOH8	MTORC1_SIGNALING	-0.449448	<2E-16	Negative
ATOH8	UNFOLDED_PROTEIN_RESPONSE	-0.437023	<2E-16	Negative
FASN	ALLOGRAFT_REJECTION	-0.428285	<2E-16	Negative
ATOH8	MITOTIC_SPINDLE	-0.410379	<2E-16	Negative
HIST2H2AC	ESTROGEN_RESPONSE_EARLY	-0.408789	<2E-16	Negative
CRTAC1	INFLAMMATORY_RESPONSE	-0.404868	<2E-16	Negative
CRTAC1	COMPLEMENT	-0.40362	<2E-16	Negative
FASN	INFLAMMATORY_RESPONSE	-0.401891	<2E-16	Negative
HIST2H2AC	HEME_METABOLISM	-0.399875	<2E-16	Negative
CRTAC1	MTORC1_SIGNALING	-0.394735	<2E-16	Negative
ATOH8	G2M_CHECKPOINT	-0.393099	2.22e-16	Negative
FASN	IL6_JAK_STAT3_SIGNALING	-0.391682	2.22e-16	Negative
CRTAC1	UV_RESPONSE_UP	-0.3906	4.44e-16	Negative
FASN	COMPLEMENT	-0.390415	4.44e-16	Negative
ATOH8	INFLAMMATORY_RESPONSE	-0.389839	4.44e-16	Negative
FASN	INTERFERON_GAMMA_RESPONSE	-0.389313	4.44e-16	Negative
ATOH8	UV_RESPONSE_UP	-0.387897	4.44e-16	Negative
CRTAC1	IL6_JAK_STAT3_SIGNALING	-0.387466	4.44e-16	Negative
ATOH8	EPITHELIAL_MESENCHYMAL_TRANSITION	-0.384108	8.88e-16	Negative
FASN	COAGULATION	-0.382627	1.33e-15	Negative
ATOH8	E2F_TARGETS	-0.372384	8.44e-15	Negative
ATOH8	COMPLEMENT	-0.372089	8.88e-15	Negative
ATOH8	SPERMATOGENESIS	-0.366772	2.26e-14	Negative
FASN	TNFA_SIGNALING_VIA_NFKB	-0.366096	2.53e-14	Negative
CRTAC1	G2M_CHECKPOINT	-0.365774	2.69e-14	Negative
CRTAC1	MITOTIC_SPINDLE	-0.365153	2.98e-14	Negative
FASN	IL2_STAT5_SIGNALING	-0.364986	3.06e-14	Negative
CRTAC1	ALLOGRAFT_REJECTION	-0.364555	3.31e-14	Negative
CRTAC1	SPERMATOGENESIS	-0.364012	3.64e-14	Negative
ATOH8	ALLOGRAFT_REJECTION	-0.361074	6.02e-14	Negative
CRTAC1	APICAL_JUNCTION	-0.360282	6.88e-14	Negative
CRTAC1	EPITHELIAL_MESENCHYMAL_TRANSITION	-0.358058	1e-13	Negative
FASN	KRAS_SIGNALING_UP	-0.356905	1.22e-13	Negative
KRT14	PEROXISOME	-0.355721	1.48e-13	Negative
FASN	INTERFERON_ALPHA_RESPONSE	-0.3531	2.3e-13	Negative
CRTAC1	E2F_TARGETS	-0.35056	3.49e-13	Negative
LGALS4	UNFOLDED_PROTEIN_RESPONSE	-0.349324	4.28e-13	Negative
ATOH8	IL6_JAK_STAT3_SIGNALING	-0.34777	5.51e-13	Negative
CRTAC1	IL2_STAT5_SIGNALING	-0.339839	1.96e-12	Negative
FASN	EPITHELIAL_MESENCHYMAL_TRANSITION	-0.339662	2.02e-12	Negative
ATOH8	APICAL_JUNCTION	-0.336789	3.17e-12	Negative
KRT14	BILE_ACID_METABOLISM	-0.335878	3.66e-12	Negative
HIST2H2AC	ESTROGEN_RESPONSE_LATE	-0.332263	6.4e-12	Negative
CRTAC1	UNFOLDED_PROTEIN_RESPONSE	-0.329024	1.05e-11	Negative
HIST2H2AC	ANDROGEN_RESPONSE	-0.328566	1.13e-11	Negative
ATOH8	IL2_STAT5_SIGNALING	-0.328495	1.14e-11	Negative
CRTAC1	KRAS_SIGNALING_UP	-0.319058	4.65e-11	Negative
CRTAC1	INTERFERON_GAMMA_RESPONSE	-0.317649	5.71e-11	Negative
ATOH8	GLYCOLYSIS	-0.316727	6.53e-11	Negative
CRTAC1	TNFA_SIGNALING_VIA_NFKB	-0.316211	7.04e-11	Negative
FASN	APOPTOSIS	-0.314056	9.61e-11	Negative
HIST2H2AC	PROTEIN_SECRETION	-0.313703	1.01e-10	Negative
ATOH8	KRAS_SIGNALING_UP	-0.313173	1.09e-10	Negative
FASN	ANGIOGENESIS	-0.312614	1.18e-10	Negative
ID2	GLYCOLYSIS	-0.31206	1.28e-10	Negative
ATOH8	TNFA_SIGNALING_VIA_NFKB	-0.3111	1.47e-10	Negative
CRTAC1	COAGULATION	-0.31012	1.68e-10	Negative
HIST2H2AC	PI3K_AKT_MTOR_SIGNALING	-0.306995	2.62e-10	Negative
HIST2H2AC	P53_PATHWAY	-0.306668	2.74e-10	Negative
ATOH8	ANGIOGENESIS	-0.306278	2.89e-10	Negative
ID2	MTORC1_SIGNALING	-0.304337	3.79e-10	Negative
CRTAC1	GLYCOLYSIS	-0.303819	4.07e-10	Negative
HIST2H2AC	UV_RESPONSE_DN	-0.302474	4.9e-10	Negative
ID2	MITOTIC_SPINDLE	-0.302279	5.03e-10	Negative
DUSP2	MTORC1_SIGNALING	-0.298802	8.1e-10	Negative
ATOH8	APICAL_SURFACE	-0.298621	8.3e-10	Negative
HIST2H2AC	APICAL_SURFACE	-0.298312	8.65e-10	Negative
DUSP2	UNFOLDED_PROTEIN_RESPONSE	-0.29587	1.2e-09	Negative
LGALS4	MTORC1_SIGNALING	-0.295196	1.32e-09	Negative
HIST2H2AC	TGF_BETA_SIGNALING	-0.29473	1.4e-09	Negative
DUSP2	MITOTIC_SPINDLE	-0.294172	1.51e-09	Negative
DUSP2	APICAL_JUNCTION	-0.293993	1.55e-09	Negative
DUSP2	GLYCOLYSIS	-0.29216	1.97e-09	Negative
EGR2	OXIDATIVE_PHOSPHORYLATION	-0.292083	1.99e-09	Negative
ATOH8	APOPTOSIS	-0.289914	2.65e-09	Negative
LGALS4	MYC_TARGETS_V2	-0.289521	2.79e-09	Negative
ATOH8	INTERFERON_GAMMA_RESPONSE	-0.289184	2.92e-09	Negative
CRTAC1	ANGIOGENESIS	-0.28818	3.32e-09	Negative
CRTAC1	APICAL_SURFACE	-0.287542	3.61e-09	Negative
CRTAC1	APOPTOSIS	-0.286525	4.12e-09	Negative
DUSP2	EPITHELIAL_MESENCHYMAL_TRANSITION	-0.286172	4.31e-09	Negative
ID2	G2M_CHECKPOINT	-0.285602	4.64e-09	Negative
LGALS4	G2M_CHECKPOINT	-0.284726	5.2e-09	Negative
CRTAC1	HEDGEHOG_SIGNALING	-0.282747	6.7e-09	Negative
HIST2H2AC	APICAL_JUNCTION	-0.281621	7.73e-09	Negative
LGALS4	MYC_TARGETS_V1	-0.279662	9.9e-09	Negative
ATOH8	HEDGEHOG_SIGNALING	-0.276275	1.51e-08	Negative
ATOH8	MYC_TARGETS_V1	-0.271613	2.68e-08	Negative
ATOH8	PI3K_AKT_MTOR_SIGNALING	-0.26998	3.27e-08	Negative
CRTAC1	HYPOXIA	-0.2687	3.82e-08	Negative
FASN	APICAL_JUNCTION	-0.267255	4.55e-08	Negative
ATOH8	HYPOXIA	-0.266473	4.99e-08	Negative
CRTAC1	PI3K_AKT_MTOR_SIGNALING	-0.26576	5.43e-08	Negative
ID2	E2F_TARGETS	-0.262948	7.58e-08	Negative
LGALS4	E2F_TARGETS	-0.261291	9.21e-08	Negative
HIST2H2AC	APOPTOSIS	-0.26064	9.93e-08	Negative
DUSP2	G2M_CHECKPOINT	-0.260377	1.02e-07	Negative
CRTAC1	REACTIVE_OXYGEN_SPECIES_PATHWAY	-0.258387	1.29e-07	Negative
ATOH8	COAGULATION	-0.258234	1.31e-07	Negative
CRTAC1	KRAS_SIGNALING_DN	-0.255547	1.79e-07	Negative
CRTAC1	INTERFERON_ALPHA_RESPONSE	-0.253177	2.34e-07	Negative
ID2	APICAL_JUNCTION	-0.251471	2.83e-07	Negative
LGALS4	EPITHELIAL_MESENCHYMAL_TRANSITION	-0.245173	5.69e-07	Negative
CRTAC1	MYOGENESIS	-0.240944	8.99e-07	Negative
FASN	HYPOXIA	-0.234814	1.72e-06	Negative
FASN	MYOGENESIS	-0.232511	2.18e-06	Negative
LPPR4	DNA_REPAIR	-0.22976	2.9e-06	Negative
HIST2H2AC	HEDGEHOG_SIGNALING	-0.229345	3.02e-06	Negative
ID2	INFLAMMATORY_RESPONSE	-0.227735	3.56e-06	Negative
HIST2H2AC	COMPLEMENT	-0.227512	3.64e-06	Negative
ID2	MYC_TARGETS_V2	-0.226466	4.04e-06	Negative
DUSP2	E2F_TARGETS	-0.225402	4.5e-06	Negative
DUSP2	HEDGEHOG_SIGNALING	-0.225127	4.62e-06	Negative
CYP1B1	MYC_TARGETS_V2	-0.224911	4.73e-06	Negative
DUSP2	SPERMATOGENESIS	-0.224628	4.86e-06	Negative
ATOH8	MYC_TARGETS_V2	-0.224458	4.94e-06	Negative
HIST1H1C	WNT_BETA_CATENIN_SIGNALING	-0.223863	5.25e-06	Negative
HIST2H2AC	KRAS_SIGNALING_UP	-0.223077	5.67e-06	Negative
HIST2H2AC	WNT_BETA_CATENIN_SIGNALING	-0.221599	6.56e-06	Negative
HIST2H2AC	COAGULATION	-0.2207	7.16e-06	Negative
CRTAC1	PANCREAS_BETA_CELLS	-0.220669	7.19e-06	Negative
ATOH8	PANCREAS_BETA_CELLS	-0.219323	8.19e-06	Negative
DUSP2	MYOGENESIS	-0.217773	9.52e-06	Negative
ATOH8	MYOGENESIS	-0.216958	1.03e-05	Negative
ID2	UNFOLDED_PROTEIN_RESPONSE	-0.216622	1.06e-05	Negative
CRTAC1	ESTROGEN_RESPONSE_LATE	-0.215619	1.17e-05	Negative
DUSP2	ANGIOGENESIS	-0.215171	1.22e-05	Negative
LGALS4	SPERMATOGENESIS	-0.214913	1.25e-05	Negative
EGR2	DNA_REPAIR	-0.214343	1.32e-05	Negative
HIST1H1C	TGF_BETA_SIGNALING	-0.214233	1.34e-05	Negative
ATOH8	INTERFERON_ALPHA_RESPONSE	-0.214172	1.34e-05	Negative
HIST2H2AC	KRAS_SIGNALING_DN	-0.212048	1.64e-05	Negative
HIST2H2AC	NOTCH_SIGNALING	-0.209418	2.1e-05	Negative
LGALS4	ALLOGRAFT_REJECTION	-0.207941	2.41e-05	Negative
ID2	REACTIVE_OXYGEN_SPECIES_PATHWAY	-0.206093	2.85e-05	Negative
CRTAC1	ANDROGEN_RESPONSE	-0.204956	3.16e-05	Negative
CYP1B1	OXIDATIVE_PHOSPHORYLATION	-0.204603	3.27e-05	Negative
HIST2H2AC	TNFA_SIGNALING_VIA_NFKB	-0.20264	3.9e-05	Negative
LPPR4	MYC_TARGETS_V2	-0.201159	4.45e-05	Negative
ID2	EPITHELIAL_MESENCHYMAL_TRANSITION	-0.200969	4.53e-05	Negative
LGALS4	MITOTIC_SPINDLE	-0.200116	4.89e-05	Negative
ID2	PI3K_AKT_MTOR_SIGNALING	-0.198772	5.5e-05	Negative
ID2	IL6_JAK_STAT3_SIGNALING	-0.198676	5.55e-05	Negative
ID2	COMPLEMENT	-0.198605	5.59e-05	Negative
DUSP2	MYC_TARGETS_V1	-0.19822	5.78e-05	Negative
CRTAC1	HEME_METABOLISM	-0.198145	5.82e-05	Negative
LGALS4	INFLAMMATORY_RESPONSE	-0.197369	6.23e-05	Negative
HIST2H2AC	IL6_JAK_STAT3_SIGNALING	-0.197115	6.37e-05	Negative
DUSP2	COAGULATION	-0.19668	6.61e-05	Negative
HIST2H2AC	INFLAMMATORY_RESPONSE	-0.194705	7.85e-05	Negative
ATOH8	ANDROGEN_RESPONSE	-0.194672	7.87e-05	Negative
KRT14	ADIPOGENESIS	-0.194439	8.03e-05	Negative
HIST2H2AC	IL2_STAT5_SIGNALING	-0.194352	8.09e-05	Negative
HIST2H2AC	XENOBIOTIC_METABOLISM	-0.193886	8.42e-05	Negative
ATOH8	CHOLESTEROL_HOMEOSTASIS	-0.1919	9.98e-05	Negative
CRTAC1	CHOLESTEROL_HOMEOSTASIS	-0.191539	0.000102959	Negative
DUSP2	NOTCH_SIGNALING	-0.189669	0.000120606	Negative
FASN	PANCREAS_BETA_CELLS	-0.189628	0.000121017	Negative
ID2	MYC_TARGETS_V1	-0.189574	0.000121567	Negative
FASN	P53_PATHWAY	-0.188848	0.000129212	Negative
CRTAC1	MYC_TARGETS_V1	-0.188704	0.00013078	Negative
EGR2	MYC_TARGETS_V2	-0.188538	0.000132618	Negative
FASN	HEDGEHOG_SIGNALING	-0.18784	0.000140577	Negative
ATOH8	UV_RESPONSE_DN	-0.183565	0.000200038	Negative
ANLN	OXIDATIVE_PHOSPHORYLATION	-0.18356	0.000200113	Negative
DUSP2	APICAL_SURFACE	-0.182892	0.000211307	Negative
CYP1B1	DNA_REPAIR	-0.182318	0.000221385	Negative
ID2	SPERMATOGENESIS	-0.182271	0.000222228	Negative
HIST2H2AC	HYPOXIA	-0.181967	0.000227769	Negative
DUSP2	COMPLEMENT	-0.181561	0.000235354	Negative
HIST1H1C	HEME_METABOLISM	-0.179326	0.000281604	Negative
HIST1H1C	UV_RESPONSE_DN	-0.177352	0.000329364	Negative
FASN	APICAL_SURFACE	-0.175802	0.000372063	Negative
ID2	ALLOGRAFT_REJECTION	-0.175554	0.000379336	Negative
ATOH8	REACTIVE_OXYGEN_SPECIES_PATHWAY	-0.175348	0.000385493	Negative
CRTAC1	UV_RESPONSE_DN	-0.175172	0.000390838	Negative
ID2	UV_RESPONSE_UP	-0.174996	0.000396246	Negative
FASN	UV_RESPONSE_DN	-0.173687	0.000438672	Negative
LGALS4	ANGIOGENESIS	-0.17322	0.000454789	Negative
DUSP2	PI3K_AKT_MTOR_SIGNALING	-0.172279	0.000488985	Negative
HIST2H2AC	ADIPOGENESIS	-0.171258	0.000528765	Negative
HIST2H2AC	MYOGENESIS	-0.170209	0.000572739	Negative
ID2	APICAL_SURFACE	-0.169169	0.000619673	Negative
DUSP2	PROTEIN_SECRETION	-0.168572	0.000648231	Negative
ATOH8	PROTEIN_SECRETION	-0.167616	0.000696432	Negative
HIST2H2AC	INTERFERON_GAMMA_RESPONSE	-0.167188	0.000719088	Negative
LPPR4	OXIDATIVE_PHOSPHORYLATION	-0.166281	0.000769366	Negative
ID2	INTERFERON_GAMMA_RESPONSE	-0.166186	0.000774845	Negative
HIST1H1C	ANDROGEN_RESPONSE	-0.164774	0.000860181	Negative
LGALS4	COMPLEMENT	-0.162627	0.00100668	Negative
DUSP2	INFLAMMATORY_RESPONSE	-0.162116	0.0010448	Negative
ID2	ANGIOGENESIS	-0.16044	0.0011793	Negative
HIST1H1C	P53_PATHWAY	-0.160177	0.00120179	Negative
HIST2H2AC	BILE_ACID_METABOLISM	-0.159261	0.00128322	Negative
PAQR4	ADIPOGENESIS	-0.158783	0.00132778	Negative
HIST2H2AC	GLYCOLYSIS	-0.158211	0.0013829	Negative
HIST2H2AC	ANGIOGENESIS	-0.158093	0.00139453	Negative
HIST1H1C	PROTEIN_SECRETION	-0.156017	0.00161437	Negative
LGALS4	IL6_JAK_STAT3_SIGNALING	-0.155748	0.00164507	Negative
ID2	COAGULATION	-0.155335	0.00169331	Negative
HIST1H1C	HEDGEHOG_SIGNALING	-0.154929	0.00174189	Negative
ID2	HYPOXIA	-0.154905	0.00174481	Negative
EGR2	PEROXISOME	-0.15473	0.00176628	Negative
LGALS4	DNA_REPAIR	-0.154362	0.00181203	Negative
HIST1H1C	NOTCH_SIGNALING	-0.154244	0.0018269	Negative
KRT14	FATTY_ACID_METABOLISM	-0.152293	0.00209002	Negative
HIST2H2AC	EPITHELIAL_MESENCHYMAL_TRANSITION	-0.151692	0.00217791	Negative
HIST2H2AC	MITOTIC_SPINDLE	-0.151672	0.00218089	Negative
HIST2H2AC	UV_RESPONSE_UP	-0.147644	0.0028625	Negative
LGALS4	REACTIVE_OXYGEN_SPECIES_PATHWAY	-0.147083	0.00297145	Negative
FASN	REACTIVE_OXYGEN_SPECIES_PATHWAY	-0.146777	0.00303252	Negative
ID2	TNFA_SIGNALING_VIA_NFKB	-0.146347	0.00312004	Negative
LGALS4	INTERFERON_GAMMA_RESPONSE	-0.145994	0.00319383	Negative
ANLN	BILE_ACID_METABOLISM	-0.144726	0.00347166	Negative
HIST1H1C	PI3K_AKT_MTOR_SIGNALING	-0.144649	0.00348916	Negative
LGALS4	APICAL_JUNCTION	-0.142831	0.00392806	Negative
PAQR4	OXIDATIVE_PHOSPHORYLATION	-0.142811	0.00393313	Negative
DUSP2	KRAS_SIGNALING_UP	-0.140554	0.00454756	Negative
ATOH8	HEME_METABOLISM	-0.140337	0.00461107	Negative
HIST2H2AC	INTERFERON_ALPHA_RESPONSE	-0.137845	0.0053988	Negative
ID2	INTERFERON_ALPHA_RESPONSE	-0.137687	0.0054524	Negative
LGALS4	IL2_STAT5_SIGNALING	-0.137045	0.00567618	Negative
ATOH8	ESTROGEN_RESPONSE_LATE	-0.136715	0.00579417	Negative
DUSP2	MYC_TARGETS_V2	-0.136271	0.00595663	Negative
LGALS4	HEDGEHOG_SIGNALING	-0.136093	0.00602299	Negative
KRT14	OXIDATIVE_PHOSPHORYLATION	-0.135673	0.0061818	Negative
ID2	APOPTOSIS	-0.135593	0.00621243	Negative
DUSP2	HYPOXIA	-0.135005	0.00644241	Negative
LGALS4	GLYCOLYSIS	-0.133047	0.00726366	Negative
DUSP2	IL6_JAK_STAT3_SIGNALING	-0.132894	0.00733182	Negative
DUSP2	PANCREAS_BETA_CELLS	-0.132627	0.0074519	Negative
DUSP2	ALLOGRAFT_REJECTION	-0.131201	0.00812291	Negative
DUSP2	UV_RESPONSE_DN	-0.130438	0.00850346	Negative
HIST1H1C	KRAS_SIGNALING_UP	-0.130141	0.00865558	Negative
DUSP2	REACTIVE_OXYGEN_SPECIES_PATHWAY	-0.129664	0.00890564	Negative
LGALS4	UV_RESPONSE_UP	-0.129503	0.00899133	Negative
HIST2H2AC	ALLOGRAFT_REJECTION	-0.12916	0.00917662	Negative
ID2	HEDGEHOG_SIGNALING	-0.128088	0.00977763	Negative
HIST1H1C	ESTROGEN_RESPONSE_EARLY	-0.12795	0.00985776	Negative
CYP1B1	MYC_TARGETS_V1	-0.127101	0.0103616	Negative
LGALS4	TNFA_SIGNALING_VIA_NFKB	-0.127015	0.0104137	Negative
LGALS4	HYPOXIA	-0.126888	0.0104915	Negative
ID2	DNA_REPAIR	-0.126389	0.0108017	Negative
ID2	IL2_STAT5_SIGNALING	-0.125085	0.0116514	Negative
PAQR4	BILE_ACID_METABOLISM	-0.124128	0.0123116	Negative
HIST2H2AC	PEROXISOME	-0.123876	0.0124911	Negative
ID2	ESTROGEN_RESPONSE_LATE	-0.122502	0.0135098	Negative
FASN	KRAS_SIGNALING_DN	-0.12244	0.0135572	Negative
ID2	KRAS_SIGNALING_UP	-0.121938	0.0139486	Negative
CRTAC1	PROTEIN_SECRETION	-0.11885	0.016581	Negative
HIST1H1C	IL2_STAT5_SIGNALING	-0.118119	0.0172638	Negative
EGR2	MYC_TARGETS_V1	-0.117381	0.0179792	Negative
CRTAC1	MYC_TARGETS_V2	-0.116684	0.0186772	Negative
ATOH8	KRAS_SIGNALING_DN	-0.112909	0.0228866	Negative
CRTAC1	ESTROGEN_RESPONSE_EARLY	-0.112612	0.0232505	Negative
LPPR4	MYC_TARGETS_V1	-0.112602	0.0232629	Negative
LGALS4	INTERFERON_ALPHA_RESPONSE	-0.110591	0.0258592	Negative
FASN	TGF_BETA_SIGNALING	-0.110367	0.0261631	Negative
DUSP2	IL2_STAT5_SIGNALING	-0.110108	0.0265189	Negative
LPPR4	REACTIVE_OXYGEN_SPECIES_PATHWAY	-0.109689	0.0271034	Negative
PAQR4	PEROXISOME	-0.109334	0.0276063	Negative
DUSP2	ANDROGEN_RESPONSE	-0.108417	0.0289436	Negative
ANLN	PEROXISOME	-0.106861	0.0313403	Negative
HIST1H1C	APICAL_JUNCTION	-0.106822	0.0314031	Negative
ID2	P53_PATHWAY	-0.106286	0.0322688	Negative
HIST2H2AC	UNFOLDED_PROTEIN_RESPONSE	-0.106262	0.0323073	Negative
ATOH8	NOTCH_SIGNALING	-0.104794	0.0347859	Negative
HIST2H2AC	MTORC1_SIGNALING	-0.104387	0.0355006	Negative
DUSP2	UV_RESPONSE_UP	-0.103372	0.0373379	Negative
CRTAC1	NOTCH_SIGNALING	-0.102853	0.0383079	Negative
HIST2H2AC	CHOLESTEROL_HOMEOSTASIS	-0.101435	0.04107	Negative
HIST1H1C	APOPTOSIS	-0.100583	0.0428066	Negative
LGALS4	KRAS_SIGNALING_UP	-0.099796	0.0444679	Negative
HIST1H1C	IL6_JAK_STAT3_SIGNALING	-0.0984649	0.0473991	Negative
ID2	MYOGENESIS	-0.0976143	0.0493558	Negative
LPPR4	E2F_TARGETS	-0.0966947	0.0515466	Negative
DUSP2	KRAS_SIGNALING_DN	-0.0961399	0.0529071	Negative
DUSP2	INTERFERON_GAMMA_RESPONSE	-0.0934956	0.0598089	Negative
CRTAC1	DNA_REPAIR	-0.0917053	0.0648916	Negative
HIST1H1C	INTERFERON_GAMMA_RESPONSE	-0.0900102	0.0700261	Negative
HIST2H2AC	PANCREAS_BETA_CELLS	-0.0891488	0.0727597	Negative
HIST1H1C	ALLOGRAFT_REJECTION	-0.0889978	0.0732478	Negative
HIST1H1C	COMPLEMENT	-0.0883027	0.0755292	Negative
DUSP2	DNA_REPAIR	-0.0881677	0.075979	Negative
HIST1H1C	INFLAMMATORY_RESPONSE	-0.0870712	0.0797127	Negative
ATOH8	DNA_REPAIR	-0.0866561	0.0811642	Negative
FASN	UV_RESPONSE_UP	-0.0842068	0.0901702	Negative
LGALS4	COAGULATION	-0.0832932	0.0937281	Negative
LPPR4	GLYCOLYSIS	-0.0819665	0.0990936	Negative
HIST1H1C	INTERFERON_ALPHA_RESPONSE	-0.08175	0.0999922	Negative
ANLN	XENOBIOTIC_METABOLISM	-0.0813784	0.101549	Negative
HIST1H1C	TNFA_SIGNALING_VIA_NFKB	-0.0809309	0.103449	Negative
ID2	PROTEIN_SECRETION	-0.0809045	0.103562	Negative
HIST1H1C	APICAL_SURFACE	-0.0804641	0.105461	Negative
HIST1H1C	ANGIOGENESIS	-0.0787628	0.113058	Negative
DUSP2	APOPTOSIS	-0.0782393	0.11548	Negative
HIST1H1C	HYPOXIA	-0.0771044	0.120871	Negative
ID2	ANDROGEN_RESPONSE	-0.0768197	0.122253	Negative
PAQR4	XENOBIOTIC_METABOLISM	-0.0764553	0.124041	Negative
HIST2H2AC	FATTY_ACID_METABOLISM	-0.0735221	0.139177	Negative
LGALS4	MYOGENESIS	-0.071274	0.151707	Negative
LGALS4	APOPTOSIS	-0.071035	0.153088	Negative
FASN	WNT_BETA_CATENIN_SIGNALING	-0.0701834	0.158086	Negative
CYP1B1	P53_PATHWAY	-0.0694857	0.162272	Negative
CRTAC1	XENOBIOTIC_METABOLISM	-0.0679298	0.171906	Negative
ID2	HEME_METABOLISM	-0.0677051	0.173331	Negative
DUSP2	HEME_METABOLISM	-0.0655181	0.187671	Negative
HIST1H1C	COAGULATION	-0.0649643	0.191437	Negative
ATOH8	ESTROGEN_RESPONSE_EARLY	-0.0643424	0.195732	Negative
ID2	ESTROGEN_RESPONSE_EARLY	-0.0635387	0.201386	Negative
CRTAC1	P53_PATHWAY	-0.0604781	0.224002	Negative
DUSP2	INTERFERON_ALPHA_RESPONSE	-0.0601047	0.22688	Negative
ANLN	ADIPOGENESIS	-0.0592596	0.233491	Negative
KRT14	XENOBIOTIC_METABOLISM	-0.0591195	0.2346	Negative
EGR2	FATTY_ACID_METABOLISM	-0.0584077	0.240292	Negative
PAQR4	NOTCH_SIGNALING	-0.0579567	0.243949	Negative
ID2	UV_RESPONSE_DN	-0.0565847	0.25531	Negative
DUSP2	CHOLESTEROL_HOMEOSTASIS	-0.0552076	0.267077	Negative
DUSP2	WNT_BETA_CATENIN_SIGNALING	-0.054775	0.270849	Negative
ANLN	MYOGENESIS	-0.0544654	0.273571	Negative
LPPR4	G2M_CHECKPOINT	-0.0527094	0.289359	Negative
ID2	NOTCH_SIGNALING	-0.0484426	0.330229	Negative
LGALS4	APICAL_SURFACE	-0.04818	0.33286	Negative
ID2	KRAS_SIGNALING_DN	-0.0474942	0.339796	Negative
LGALS4	NOTCH_SIGNALING	-0.0454685	0.360815	Negative
HIST1H1C	MITOTIC_SPINDLE	-0.0451519	0.364173	Negative
HIST1H1C	MYC_TARGETS_V1	-0.0450562	0.365191	Negative
LGALS4	PI3K_AKT_MTOR_SIGNALING	-0.0446406	0.369635	Negative
DUSP2	ESTROGEN_RESPONSE_LATE	-0.0434368	0.382696	Negative
HIST1H1C	UNFOLDED_PROTEIN_RESPONSE	-0.0429387	0.388181	Negative
FASN	XENOBIOTIC_METABOLISM	-0.0426961	0.390869	Negative
LPPR4	FATTY_ACID_METABOLISM	-0.040889	0.411251	Negative
FASN	HEME_METABOLISM	-0.0389412	0.433908	Negative
HIST1H1C	ESTROGEN_RESPONSE_LATE	-0.0384866	0.439298	Negative
DHCR24	OXIDATIVE_PHOSPHORYLATION	-0.0382357	0.442289	Negative
HIST1H1C	EPITHELIAL_MESENCHYMAL_TRANSITION	-0.0381103	0.443788	Negative
LGALS4	UV_RESPONSE_DN	-0.0362503	0.466362	Negative
LGALS4	PANCREAS_BETA_CELLS	-0.0353644	0.477334	Negative
HIST1H1C	MYC_TARGETS_V2	-0.0352573	0.47867	Negative
DUSP2	ESTROGEN_RESPONSE_EARLY	-0.0347843	0.484592	Negative
HIST1H1C	GLYCOLYSIS	-0.0343502	0.490064	Negative
HIST1H1C	PANCREAS_BETA_CELLS	-0.0323586	0.515584	Negative
LPPR4	MTORC1_SIGNALING	-0.0306841	0.53756	Negative
ATOH8	XENOBIOTIC_METABOLISM	-0.0284602	0.567454	Negative
HIST1H1C	MTORC1_SIGNALING	-0.0279996	0.573743	Negative
HIST2H2AC	REACTIVE_OXYGEN_SPECIES_PATHWAY	-0.027937	0.574601	Negative
FASN	ESTROGEN_RESPONSE_LATE	-0.0271166	0.585891	Negative
LGALS4	WNT_BETA_CATENIN_SIGNALING	-0.0267763	0.590604	Negative
DHCR24	WNT_BETA_CATENIN_SIGNALING	-0.0234915	0.636964	Negative
CRTAC1	WNT_BETA_CATENIN_SIGNALING	-0.0233678	0.63874	Negative
CYP1B1	PEROXISOME	-0.0216542	0.663543	Negative
ID2	CHOLESTEROL_HOMEOSTASIS	-0.021613	0.664144	Negative
PAQR4	P53_PATHWAY	-0.0212925	0.668828	Negative
CYP1B1	E2F_TARGETS	-0.0200369	0.687295	Negative
HIST1H1C	REACTIVE_OXYGEN_SPECIES_PATHWAY	-0.0171615	0.730279	Negative
HIST1H1C	KRAS_SIGNALING_DN	-0.0161354	0.745833	Negative
LPPR4	PEROXISOME	-0.0133875	0.787982	Negative
ATOH8	P53_PATHWAY	-0.0121921	0.806522	Negative
HIST1H1C	ADIPOGENESIS	-0.011591	0.815885	Negative
CYP1B1	G2M_CHECKPOINT	-0.0114538	0.818027	Negative
FASN	NOTCH_SIGNALING	-0.0088889	0.858285	Negative
DUSP2	TNFA_SIGNALING_VIA_NFKB	-0.00829421	0.867676	Negative
LGALS4	CHOLESTEROL_HOMEOSTASIS	-0.00772731	0.876645	Negative
EGR2	E2F_TARGETS	-0.0059491	0.904877	Negative
ANLN	NOTCH_SIGNALING	-0.00553772	0.911427	Negative
HIST1H1C	MYOGENESIS	-0.00318177	0.949039	Negative
LPPR4	SPERMATOGENESIS	-0.00145127	0.976743	Negative
PAQR4	TGF_BETA_SIGNALING	-0.000624764	0.989987	Negative
HIST1H1C	OXIDATIVE_PHOSPHORYLATION	0.00364702	0.9416	Positive
ATOH8	WNT_BETA_CATENIN_SIGNALING	0.00419923	0.932777	Positive
CRTAC1	TGF_BETA_SIGNALING	0.00595203	0.904831	Positive
LGALS4	PROTEIN_SECRETION	0.00633648	0.898715	Positive
ANLN	P53_PATHWAY	0.00701413	0.887952	Positive
HIST1H1C	UV_RESPONSE_UP	0.0125045	0.801666	Positive
ATOH8	TGF_BETA_SIGNALING	0.0130638	0.792992	Positive
DHCR24	TGF_BETA_SIGNALING	0.0175327	0.72468	Positive
ID2	PANCREAS_BETA_CELLS	0.019558	0.69439	Positive
DUSP2	TGF_BETA_SIGNALING	0.0208909	0.674713	Positive
DUSP2	ADIPOGENESIS	0.0220193	0.658227	Positive
LGALS4	TGF_BETA_SIGNALING	0.023041	0.643441	Positive
CYP1B1	GLYCOLYSIS	0.023337	0.639183	Positive
LGALS4	ANDROGEN_RESPONSE	0.023481	0.637116	Positive
DHCR24	MYOGENESIS	0.0237385	0.633426	Positive
CRTAC1	FATTY_ACID_METABOLISM	0.0240345	0.629197	Positive
DHCR24	ANGIOGENESIS	0.0252213	0.612359	Positive
PAQR4	WNT_BETA_CATENIN_SIGNALING	0.0252424	0.612062	Positive
EGR2	ADIPOGENESIS	0.0254094	0.609709	Positive
ATOH8	ADIPOGENESIS	0.0256781	0.605932	Positive
HIST1H1C	XENOBIOTIC_METABOLISM	0.0315224	0.5265	Positive
KRT14	CHOLESTEROL_HOMEOSTASIS	0.0322111	0.517501	Positive
LPPR4	CHOLESTEROL_HOMEOSTASIS	0.0322712	0.516719	Positive
DUSP2	XENOBIOTIC_METABOLISM	0.03285	0.509224	Positive
PAQR4	FATTY_ACID_METABOLISM	0.0330258	0.506959	Positive
FASN	ESTROGEN_RESPONSE_EARLY	0.0355622	0.474872	Positive
ATOH8	FATTY_ACID_METABOLISM	0.0355933	0.474485	Positive
KRT14	PANCREAS_BETA_CELLS	0.0362556	0.466297	Positive
PAQR4	MYOGENESIS	0.0367853	0.459805	Positive
LPPR4	P53_PATHWAY	0.0370407	0.456692	Positive
EGR2	G2M_CHECKPOINT	0.0381302	0.44355	Positive
CYP1B1	MTORC1_SIGNALING	0.0391796	0.431097	Positive
ANLN	FATTY_ACID_METABOLISM	0.0425116	0.392923	Positive
CYP1B1	PI3K_AKT_MTOR_SIGNALING	0.0442207	0.374159	Positive
HIST1H1C	PEROXISOME	0.0456663	0.358728	Positive
CRTAC1	ADIPOGENESIS	0.0470601	0.344232	Positive
DUSP2	P53_PATHWAY	0.0480658	0.334008	Positive
ANLN	PANCREAS_BETA_CELLS	0.0501522	0.313427	Positive
DHCR24	PANCREAS_BETA_CELLS	0.0503226	0.311783	Positive
ID2	WNT_BETA_CATENIN_SIGNALING	0.0525386	0.290927	Positive
PAQR4	ANGIOGENESIS	0.0529145	0.287485	Positive
HIST1H1C	FATTY_ACID_METABOLISM	0.0550369	0.268561	Positive
DHCR24	EPITHELIAL_MESENCHYMAL_TRANSITION	0.0561724	0.258795	Positive
LPPR4	ADIPOGENESIS	0.0568815	0.252821	Positive
CRTAC1	BILE_ACID_METABOLISM	0.0582454	0.241603	Positive
ID2	TGF_BETA_SIGNALING	0.0588489	0.236753	Positive
HIST2H2AC	G2M_CHECKPOINT	0.0602193	0.225994	Positive
KRT14	NOTCH_SIGNALING	0.0603673	0.224853	Positive
PAQR4	UV_RESPONSE_DN	0.060444	0.224264	Positive
LPPR4	UNFOLDED_PROTEIN_RESPONSE	0.0606552	0.222645	Positive
LPPR4	INTERFERON_ALPHA_RESPONSE	0.0610263	0.219823	Positive
ID2	ADIPOGENESIS	0.0620919	0.211861	Positive
KRT14	PROTEIN_SECRETION	0.0629557	0.205561	Positive
HIST2H2AC	MYC_TARGETS_V1	0.0651329	0.190285	Positive
CYP1B1	FATTY_ACID_METABOLISM	0.0672973	0.175942	Positive
EGR2	GLYCOLYSIS	0.0689749	0.165389	Positive
ANLN	COAGULATION	0.0697809	0.160491	Positive
CYP1B1	UNFOLDED_PROTEIN_RESPONSE	0.0711054	0.15268	Positive
DHCR24	NOTCH_SIGNALING	0.0717559	0.148952	Positive
ANLN	WNT_BETA_CATENIN_SIGNALING	0.0720428	0.147329	Positive
LGALS4	KRAS_SIGNALING_DN	0.0726292	0.144055	Positive
ID2	XENOBIOTIC_METABOLISM	0.0744475	0.134256	Positive
ANLN	KRAS_SIGNALING_DN	0.0758993	0.126807	Positive
HIST1H1C	BILE_ACID_METABOLISM	0.0761192	0.125707	Positive
ATOH8	BILE_ACID_METABOLISM	0.0784446	0.114525	Positive
DHCR24	COAGULATION	0.0787537	0.1131	Positive
PAQR4	PROTEIN_SECRETION	0.0793241	0.110506	Positive
HIST2H2AC	SPERMATOGENESIS	0.0804496	0.105525	Positive
FASN	DNA_REPAIR	0.081963	0.0991084	Positive
DHCR24	MYC_TARGETS_V2	0.0820121	0.0989051	Positive
CYP1B1	REACTIVE_OXYGEN_SPECIES_PATHWAY	0.0833836	0.0933713	Positive
PAQR4	COAGULATION	0.0856117	0.0849113	Positive
HIST2H2AC	E2F_TARGETS	0.0856698	0.0846994	Positive
HIST1H1C	G2M_CHECKPOINT	0.0867025	0.0810011	Positive
CYP1B1	WNT_BETA_CATENIN_SIGNALING	0.0902069	0.0694136	Positive
HIST2H2AC	OXIDATIVE_PHOSPHORYLATION	0.0905159	0.0684604	Positive
KRT14	MYOGENESIS	0.0912375	0.0662766	Positive
DHCR24	DNA_REPAIR	0.0915244	0.0654242	Positive
CYP1B1	INTERFERON_ALPHA_RESPONSE	0.092288	0.0631995	Positive
CYP1B1	MITOTIC_SPINDLE	0.0932416	0.0605094	Positive
FASN	GLYCOLYSIS	0.0946478	0.0567152	Positive
ANLN	ESTROGEN_RESPONSE_EARLY	0.0973713	0.0499269	Positive
KRT14	DNA_REPAIR	0.0981005	0.0482293	Positive
PAQR4	ESTROGEN_RESPONSE_EARLY	0.0985538	0.0471985	Positive
FASN	ANDROGEN_RESPONSE	0.0996898	0.0446961	Positive
KRT14	SPERMATOGENESIS	0.100709	0.0425465	Positive
ID2	FATTY_ACID_METABOLISM	0.103547	0.0370149	Positive
LPPR4	MITOTIC_SPINDLE	0.103952	0.0362788	Positive
EGR2	PROTEIN_SECRETION	0.104335	0.0355922	Positive
LGALS4	HEME_METABOLISM	0.105503	0.0335701	Positive
DHCR24	IL2_STAT5_SIGNALING	0.105943	0.0328334	Positive
CYP1B1	TGF_BETA_SIGNALING	0.10726	0.0307103	Positive
HIST2H2AC	MYC_TARGETS_V2	0.108249	0.0291953	Positive
DHCR24	P53_PATHWAY	0.108671	0.0285687	Positive
LPPR4	PI3K_AKT_MTOR_SIGNALING	0.109045	0.028022	Positive
LPPR4	ESTROGEN_RESPONSE_LATE	0.109594	0.0272365	Positive
CYP1B1	PROTEIN_SECRETION	0.109899	0.0268088	Positive
DHCR24	KRAS_SIGNALING_UP	0.109986	0.0266876	Positive
DHCR24	UV_RESPONSE_DN	0.110066	0.0265767	Positive
CYP1B1	ADIPOGENESIS	0.110399	0.0261205	Positive
EGR2	BILE_ACID_METABOLISM	0.110542	0.0259263	Positive
HIST1H1C	DNA_REPAIR	0.110953	0.0253746	Positive
DHCR24	TNFA_SIGNALING_VIA_NFKB	0.111441	0.0247327	Positive
KRT14	ESTROGEN_RESPONSE_EARLY	0.112834	0.0229777	Positive
LGALS4	OXIDATIVE_PHOSPHORYLATION	0.113231	0.0224987	Positive
DHCR24	HEDGEHOG_SIGNALING	0.114765	0.0207244	Positive
DHCR24	INTERFERON_ALPHA_RESPONSE	0.117647	0.0177185	Positive
PAQR4	KRAS_SIGNALING_UP	0.120296	0.0152981	Positive
LPPR4	BILE_ACID_METABOLISM	0.120487	0.0151355	Positive
ID2	OXIDATIVE_PHOSPHORYLATION	0.121037	0.0146756	Positive
DUSP2	FATTY_ACID_METABOLISM	0.121651	0.0141764	Positive
ANLN	REACTIVE_OXYGEN_SPECIES_PATHWAY	0.121694	0.0141418	Positive
CYP1B1	ESTROGEN_RESPONSE_EARLY	0.121896	0.0139819	Positive
HIST2H2AC	DNA_REPAIR	0.123086	0.0130678	Positive
DUSP2	BILE_ACID_METABOLISM	0.123506	0.0127583	Positive
DUSP2	OXIDATIVE_PHOSPHORYLATION	0.123788	0.0125537	Positive
LPPR4	XENOBIOTIC_METABOLISM	0.124709	0.0119066	Positive
HIST1H1C	E2F_TARGETS	0.12609	0.0109917	Positive
DHCR24	ALLOGRAFT_REJECTION	0.126789	0.0105523	Positive
DHCR24	APICAL_JUNCTION	0.127462	0.0101445	Positive
ANLN	ANGIOGENESIS	0.127973	0.00984431	Positive
EGR2	MTORC1_SIGNALING	0.128157	0.0097381	Positive
PAQR4	TNFA_SIGNALING_VIA_NFKB	0.128243	0.00968883	Positive
PAQR4	ANDROGEN_RESPONSE	0.128366	0.00961864	Positive
PAQR4	REACTIVE_OXYGEN_SPECIES_PATHWAY	0.130351	0.00854797	Positive
LGALS4	P53_PATHWAY	0.131072	0.00818579	Positive
CYP1B1	SPERMATOGENESIS	0.131465	0.00799434	Positive
LPPR4	INTERFERON_GAMMA_RESPONSE	0.132587	0.00746984	Positive
CYP1B1	ESTROGEN_RESPONSE_LATE	0.132888	0.00733463	Positive
CYP1B1	CHOLESTEROL_HOMEOSTASIS	0.132989	0.00728944	Positive
KRT14	HEME_METABOLISM	0.13402	0.00684466	Positive
DUSP2	PEROXISOME	0.137687	0.00545246	Positive
PAQR4	CHOLESTEROL_HOMEOSTASIS	0.139004	0.0050185	Positive
DHCR24	INTERFERON_GAMMA_RESPONSE	0.144389	0.00354911	Positive
ATOH8	PEROXISOME	0.147662	0.00285906	Positive
PAQR4	PANCREAS_BETA_CELLS	0.148216	0.00275508	Positive
KRT14	UV_RESPONSE_DN	0.149295	0.00256256	Positive
ANLN	KRAS_SIGNALING_UP	0.149485	0.00253002	Positive
EGR2	P53_PATHWAY	0.149517	0.00252452	Positive
LPPR4	PROTEIN_SECRETION	0.151246	0.00224519	Positive
HIST1H1C	CHOLESTEROL_HOMEOSTASIS	0.151876	0.0021506	Positive
PAQR4	IL2_STAT5_SIGNALING	0.152359	0.00208064	Positive
LPPR4	HYPOXIA	0.154735	0.00176556	Positive
FASN	OXIDATIVE_PHOSPHORYLATION	0.154835	0.00175338	Positive
PAQR4	EPITHELIAL_MESENCHYMAL_TRANSITION	0.155391	0.00168667	Positive
CYP1B1	NOTCH_SIGNALING	0.155419	0.00168338	Positive
PAQR4	APICAL_SURFACE	0.157457	0.00145875	Positive
LPPR4	UV_RESPONSE_UP	0.158859	0.00132062	Positive
LGALS4	ESTROGEN_RESPONSE_LATE	0.160736	0.0011544	Positive
HIST1H1C	SPERMATOGENESIS	0.160821	0.00114737	Positive
CYP1B1	KRAS_SIGNALING_DN	0.161964	0.00105638	Positive
DHCR24	HYPOXIA	0.163001	0.000979615	Positive
DHCR24	BILE_ACID_METABOLISM	0.164924	0.000850666	Positive
ATOH8	OXIDATIVE_PHOSPHORYLATION	0.166542	0.000754583	Positive
PAQR4	APOPTOSIS	0.166627	0.000749819	Positive
DHCR24	REACTIVE_OXYGEN_SPECIES_PATHWAY	0.166916	0.00073383	Positive
DHCR24	XENOBIOTIC_METABOLISM	0.167681	0.000693042	Positive
DHCR24	INFLAMMATORY_RESPONSE	0.167926	0.000680463	Positive
EGR2	REACTIVE_OXYGEN_SPECIES_PATHWAY	0.168318	0.000660687	Positive
DHCR24	APOPTOSIS	0.168709	0.000641571	Positive
FASN	PI3K_AKT_MTOR_SIGNALING	0.169243	0.000616201	Positive
DHCR24	IL6_JAK_STAT3_SIGNALING	0.171086	0.000535756	Positive
PAQR4	HYPOXIA	0.171758	0.000508904	Positive
FASN	BILE_ACID_METABOLISM	0.172569	0.00047817	Positive
KRT14	ANDROGEN_RESPONSE	0.173644	0.000440128	Positive
LPPR4	TNFA_SIGNALING_VIA_NFKB	0.176865	0.000342264	Positive
KRT14	WNT_BETA_CATENIN_SIGNALING	0.178279	0.000306058	Positive
CRTAC1	PEROXISOME	0.178892	0.00029151	Positive
LGALS4	ADIPOGENESIS	0.179114	0.000286406	Positive
EGR2	SPERMATOGENESIS	0.179899	0.000268995	Positive
LPPR4	ALLOGRAFT_REJECTION	0.18023	0.000261972	Positive
DHCR24	ADIPOGENESIS	0.181191	0.000242488	Positive
ANLN	TGF_BETA_SIGNALING	0.181456	0.000237373	Positive
CYP1B1	ANDROGEN_RESPONSE	0.183667	0.000198365	Positive
KRT14	TGF_BETA_SIGNALING	0.185206	0.000174858	Positive
ANLN	EPITHELIAL_MESENCHYMAL_TRANSITION	0.185306	0.000173426	Positive
EGR2	MITOTIC_SPINDLE	0.185662	0.000168411	Positive
LPPR4	ESTROGEN_RESPONSE_EARLY	0.187535	0.000144205	Positive
ID2	PEROXISOME	0.189568	0.000121632	Positive
LPPR4	IL6_JAK_STAT3_SIGNALING	0.189672	0.000120575	Positive
ANLN	APICAL_SURFACE	0.189802	0.000119258	Positive
ANLN	IL2_STAT5_SIGNALING	0.190447	0.000112944	Positive
LGALS4	ESTROGEN_RESPONSE_EARLY	0.190789	0.000109719	Positive
LPPR4	INFLAMMATORY_RESPONSE	0.191676	0.000101767	Positive
DHCR24	COMPLEMENT	0.192923	9.15e-05	Positive
ANLN	ALLOGRAFT_REJECTION	0.19489	7.72e-05	Positive
EGR2	UNFOLDED_PROTEIN_RESPONSE	0.196442	6.75e-05	Positive
FASN	MYC_TARGETS_V2	0.197511	6.15e-05	Positive
CYP1B1	INTERFERON_GAMMA_RESPONSE	0.198125	5.83e-05	Positive
ANLN	TNFA_SIGNALING_VIA_NFKB	0.198496	5.64e-05	Positive
LGALS4	FATTY_ACID_METABOLISM	0.198823	5.48e-05	Positive
PAQR4	INFLAMMATORY_RESPONSE	0.199869	5e-05	Positive
ID2	BILE_ACID_METABOLISM	0.200132	4.88e-05	Positive
LGALS4	XENOBIOTIC_METABOLISM	0.201124	4.47e-05	Positive
PAQR4	ALLOGRAFT_REJECTION	0.20132	4.39e-05	Positive
ANLN	UV_RESPONSE_DN	0.2019	4.17e-05	Positive
ANLN	INTERFERON_ALPHA_RESPONSE	0.20501	3.15e-05	Positive
PAQR4	IL6_JAK_STAT3_SIGNALING	0.205459	3.02e-05	Positive
PAQR4	HEDGEHOG_SIGNALING	0.205874	2.91e-05	Positive
CRTAC1	OXIDATIVE_PHOSPHORYLATION	0.207307	2.55e-05	Positive
CYP1B1	TNFA_SIGNALING_VIA_NFKB	0.207735	2.45e-05	Positive
KRT14	KRAS_SIGNALING_DN	0.210083	1.97e-05	Positive
PAQR4	MYC_TARGETS_V2	0.213606	1.42e-05	Positive
DHCR24	APICAL_SURFACE	0.214405	1.32e-05	Positive
DHCR24	MYC_TARGETS_V1	0.214573	1.29e-05	Positive
EGR2	PI3K_AKT_MTOR_SIGNALING	0.216293	1.1e-05	Positive
CYP1B1	HEME_METABOLISM	0.217204	1.01e-05	Positive
FASN	E2F_TARGETS	0.217244	1e-05	Positive
PAQR4	INTERFERON_ALPHA_RESPONSE	0.217987	9.33e-06	Positive
CYP1B1	UV_RESPONSE_UP	0.218211	9.13e-06	Positive
PAQR4	HEME_METABOLISM	0.219444	8.1e-06	Positive
ANLN	INTERFERON_GAMMA_RESPONSE	0.219882	7.76e-06	Positive
FASN	MITOTIC_SPINDLE	0.221626	6.54e-06	Positive
LPPR4	KRAS_SIGNALING_DN	0.222249	6.15e-06	Positive
ANLN	APICAL_JUNCTION	0.222399	6.06e-06	Positive
PAQR4	APICAL_JUNCTION	0.222966	5.73e-06	Positive
ANLN	ESTROGEN_RESPONSE_LATE	0.22321	5.6e-06	Positive
FASN	SPERMATOGENESIS	0.223693	5.33e-06	Positive
PAQR4	INTERFERON_GAMMA_RESPONSE	0.223797	5.28e-06	Positive
CYP1B1	HYPOXIA	0.223915	5.22e-06	Positive
PAQR4	COMPLEMENT	0.223949	5.2e-06	Positive
LPPR4	HEME_METABOLISM	0.224386	4.98e-06	Positive
ANLN	APOPTOSIS	0.224516	4.92e-06	Positive
EGR2	XENOBIOTIC_METABOLISM	0.224566	4.89e-06	Positive
PAQR4	KRAS_SIGNALING_DN	0.224878	4.74e-06	Positive
CYP1B1	BILE_ACID_METABOLISM	0.22951	2.97e-06	Positive
FASN	PROTEIN_SECRETION	0.230559	2.67e-06	Positive
LPPR4	ANDROGEN_RESPONSE	0.230786	2.61e-06	Positive
KRT14	ESTROGEN_RESPONSE_LATE	0.231322	2.47e-06	Positive
LPPR4	COMPLEMENT	0.231507	2.42e-06	Positive
DHCR24	PEROXISOME	0.232509	2.18e-06	Positive
FASN	MTORC1_SIGNALING	0.233107	2.05e-06	Positive
CYP1B1	XENOBIOTIC_METABOLISM	0.234455	1.79e-06	Positive
EGR2	CHOLESTEROL_HOMEOSTASIS	0.237961	1.24e-06	Positive
FASN	G2M_CHECKPOINT	0.238374	1.18e-06	Positive
ANLN	IL6_JAK_STAT3_SIGNALING	0.239179	1.09e-06	Positive
DHCR24	FATTY_ACID_METABOLISM	0.239885	1.01e-06	Positive
ANLN	COMPLEMENT	0.242176	7.88e-07	Positive
KRT14	PI3K_AKT_MTOR_SIGNALING	0.24474	5.97e-07	Positive
ANLN	INFLAMMATORY_RESPONSE	0.248948	3.76e-07	Positive
EGR2	INTERFERON_ALPHA_RESPONSE	0.254558	2e-07	Positive
ANLN	DNA_REPAIR	0.256639	1.58e-07	Positive
LGALS4	BILE_ACID_METABOLISM	0.258448	1.28e-07	Positive
FASN	MYC_TARGETS_V1	0.258937	1.21e-07	Positive
EGR2	ESTROGEN_RESPONSE_EARLY	0.259848	1.09e-07	Positive
KRT14	REACTIVE_OXYGEN_SPECIES_PATHWAY	0.259902	1.08e-07	Positive
FASN	FATTY_ACID_METABOLISM	0.260437	1.02e-07	Positive
ANLN	HEDGEHOG_SIGNALING	0.261719	8.76e-08	Positive
LPPR4	COAGULATION	0.264455	6.35e-08	Positive
DHCR24	KRAS_SIGNALING_DN	0.26509	5.89e-08	Positive
KRT14	UNFOLDED_PROTEIN_RESPONSE	0.265146	5.85e-08	Positive
PAQR4	ESTROGEN_RESPONSE_LATE	0.267213	4.57e-08	Positive
LPPR4	APICAL_SURFACE	0.267402	4.47e-08	Positive
EGR2	ESTROGEN_RESPONSE_LATE	0.269006	3.68e-08	Positive
KRT14	MYC_TARGETS_V1	0.269299	3.55e-08	Positive
ANLN	HYPOXIA	0.272616	2.37e-08	Positive
KRT14	E2F_TARGETS	0.274833	1.81e-08	Positive
LPPR4	IL2_STAT5_SIGNALING	0.275434	1.68e-08	Positive
KRT14	COAGULATION	0.27746	1.3e-08	Positive
LPPR4	PANCREAS_BETA_CELLS	0.2781	1.2e-08	Positive
CYP1B1	HEDGEHOG_SIGNALING	0.279405	1.02e-08	Positive
CYP1B1	APICAL_SURFACE	0.280495	8.91e-09	Positive
LPPR4	NOTCH_SIGNALING	0.281064	8.29e-09	Positive
KRT14	ANGIOGENESIS	0.282016	7.35e-09	Positive
DHCR24	ESTROGEN_RESPONSE_EARLY	0.282414	6.99e-09	Positive
CYP1B1	APOPTOSIS	0.285442	4.74e-09	Positive
PAQR4	PI3K_AKT_MTOR_SIGNALING	0.28624	4.28e-09	Positive
KRT14	UV_RESPONSE_UP	0.287161	3.8e-09	Positive
FASN	ADIPOGENESIS	0.292226	1.95e-09	Positive
KRT14	APICAL_SURFACE	0.293103	1.74e-09	Positive
LPPR4	APOPTOSIS	0.293476	1.66e-09	Positive
LPPR4	TGF_BETA_SIGNALING	0.294297	1.48e-09	Positive
LGALS4	PEROXISOME	0.297631	9.49e-10	Positive
KRT14	KRAS_SIGNALING_UP	0.298592	8.33e-10	Positive
DHCR24	UNFOLDED_PROTEIN_RESPONSE	0.299662	7.2e-10	Positive
ANLN	HEME_METABOLISM	0.300075	6.81e-10	Positive
DHCR24	PROTEIN_SECRETION	0.300139	6.75e-10	Positive
KRT14	HEDGEHOG_SIGNALING	0.301305	5.75e-10	Positive
CYP1B1	IL6_JAK_STAT3_SIGNALING	0.301828	5.36e-10	Positive
CYP1B1	INFLAMMATORY_RESPONSE	0.30228	5.03e-10	Positive
FASN	UNFOLDED_PROTEIN_RESPONSE	0.302484	4.89e-10	Positive
KRT14	MYC_TARGETS_V2	0.304951	3.48e-10	Positive
KRT14	EPITHELIAL_MESENCHYMAL_TRANSITION	0.306429	2.83e-10	Positive
ANLN	CHOLESTEROL_HOMEOSTASIS	0.306625	2.76e-10	Positive
EGR2	NOTCH_SIGNALING	0.308173	2.22e-10	Positive
KRT14	MITOTIC_SPINDLE	0.30825	2.19e-10	Positive
CYP1B1	ALLOGRAFT_REJECTION	0.309309	1.89e-10	Positive
PAQR4	UNFOLDED_PROTEIN_RESPONSE	0.316555	6.69e-11	Positive
KRT14	IL2_STAT5_SIGNALING	0.317934	5.48e-11	Positive
KRT14	APOPTOSIS	0.318076	5.37e-11	Positive
EGR2	HEME_METABOLISM	0.320128	3.97e-11	Positive
LPPR4	APICAL_JUNCTION	0.325842	1.7e-11	Positive
EGR2	TGF_BETA_SIGNALING	0.326036	1.65e-11	Positive
KRT14	G2M_CHECKPOINT	0.327825	1.26e-11	Positive
CYP1B1	COAGULATION	0.32935	9.99e-12	Positive
LPPR4	MYOGENESIS	0.329518	9.74e-12	Positive
CYP1B1	APICAL_JUNCTION	0.330175	8.81e-12	Positive
CYP1B1	COMPLEMENT	0.333376	5.39e-12	Positive
LPPR4	KRAS_SIGNALING_UP	0.333882	4.99e-12	Positive
DHCR24	UV_RESPONSE_UP	0.334449	4.57e-12	Positive
KRT14	P53_PATHWAY	0.334979	4.21e-12	Positive
DHCR24	HEME_METABOLISM	0.335647	3.79e-12	Positive
PAQR4	DNA_REPAIR	0.337569	2.81e-12	Positive
EGR2	WNT_BETA_CATENIN_SIGNALING	0.341154	1.6e-12	Positive
DHCR24	ANDROGEN_RESPONSE	0.342042	1.39e-12	Positive
KRT14	APICAL_JUNCTION	0.342344	1.32e-12	Positive
CYP1B1	ANGIOGENESIS	0.347086	6.16e-13	Positive
ANLN	MYC_TARGETS_V2	0.348562	4.84e-13	Positive
CYP1B1	MYOGENESIS	0.349967	3.85e-13	Positive
CYP1B1	IL2_STAT5_SIGNALING	0.353164	2.27e-13	Positive
CYP1B1	KRAS_SIGNALING_UP	0.353517	2.14e-13	Positive
CYP1B1	UV_RESPONSE_DN	0.357199	1.16e-13	Positive
LPPR4	WNT_BETA_CATENIN_SIGNALING	0.358618	9.13e-14	Positive
LPPR4	EPITHELIAL_MESENCHYMAL_TRANSITION	0.359516	7.84e-14	Positive
EGR2	ANDROGEN_RESPONSE	0.35972	7.57e-14	Positive
DHCR24	ESTROGEN_RESPONSE_LATE	0.359775	7.51e-14	Positive
LPPR4	ANGIOGENESIS	0.360448	6.71e-14	Positive
DHCR24	MITOTIC_SPINDLE	0.361098	6e-14	Positive
DHCR24	SPERMATOGENESIS	0.361924	5.2e-14	Positive
ANLN	ANDROGEN_RESPONSE	0.364943	3.11e-14	Positive
KRT14	INTERFERON_ALPHA_RESPONSE	0.367584	1.95e-14	Positive
KRT14	ALLOGRAFT_REJECTION	0.372739	7.99e-15	Positive
DHCR24	E2F_TARGETS	0.373418	7.11e-15	Positive
CYP1B1	PANCREAS_BETA_CELLS	0.37375	6.66e-15	Positive
KRT14	GLYCOLYSIS	0.374048	6.22e-15	Positive
KRT14	COMPLEMENT	0.379056	2.66e-15	Positive
KRT14	HYPOXIA	0.379531	2.22e-15	Positive
DHCR24	PI3K_AKT_MTOR_SIGNALING	0.385217	8.88e-16	Positive
CYP1B1	EPITHELIAL_MESENCHYMAL_TRANSITION	0.387066	4.44e-16	Positive
DHCR24	G2M_CHECKPOINT	0.387196	4.44e-16	Positive
PAQR4	MYC_TARGETS_V1	0.388221	4.44e-16	Positive
FASN	PEROXISOME	0.390378	4.44e-16	Positive
FASN	CHOLESTEROL_HOMEOSTASIS	0.391496	2.22e-16	Positive
KRT14	INTERFERON_GAMMA_RESPONSE	0.392384	2.22e-16	Positive
EGR2	INTERFERON_GAMMA_RESPONSE	0.395624	<2E-16	Positive
KRT14	IL6_JAK_STAT3_SIGNALING	0.397777	<2E-16	Positive
LPPR4	HEDGEHOG_SIGNALING	0.399667	<2E-16	Positive
EGR2	KRAS_SIGNALING_DN	0.404694	<2E-16	Positive
KRT14	MTORC1_SIGNALING	0.408397	<2E-16	Positive
ANLN	UV_RESPONSE_UP	0.408871	<2E-16	Positive
PAQR4	UV_RESPONSE_UP	0.412643	<2E-16	Positive
ANLN	PROTEIN_SECRETION	0.415287	<2E-16	Positive
KRT14	TNFA_SIGNALING_VIA_NFKB	0.418781	<2E-16	Positive
PAQR4	GLYCOLYSIS	0.419166	<2E-16	Positive
KRT14	INFLAMMATORY_RESPONSE	0.429729	<2E-16	Positive
DHCR24	GLYCOLYSIS	0.443546	<2E-16	Positive
PAQR4	MTORC1_SIGNALING	0.443557	<2E-16	Positive
LPPR4	UV_RESPONSE_DN	0.446061	<2E-16	Positive
EGR2	APICAL_SURFACE	0.451542	<2E-16	Positive
EGR2	UV_RESPONSE_UP	0.470197	<2E-16	Positive
DHCR24	CHOLESTEROL_HOMEOSTASIS	0.471193	<2E-16	Positive
EGR2	HYPOXIA	0.477692	<2E-16	Positive
EGR2	PANCREAS_BETA_CELLS	0.501143	<2E-16	Positive
EGR2	ALLOGRAFT_REJECTION	0.502115	<2E-16	Positive
ANLN	GLYCOLYSIS	0.505921	<2E-16	Positive
DHCR24	MTORC1_SIGNALING	0.507187	<2E-16	Positive
PAQR4	MITOTIC_SPINDLE	0.508135	<2E-16	Positive
ANLN	PI3K_AKT_MTOR_SIGNALING	0.514103	<2E-16	Positive
PAQR4	SPERMATOGENESIS	0.52141	<2E-16	Positive
EGR2	IL6_JAK_STAT3_SIGNALING	0.52267	<2E-16	Positive
EGR2	INFLAMMATORY_RESPONSE	0.535166	<2E-16	Positive
EGR2	COAGULATION	0.551503	<2E-16	Positive
EGR2	UV_RESPONSE_DN	0.551983	<2E-16	Positive
EGR2	TNFA_SIGNALING_VIA_NFKB	0.552451	<2E-16	Positive
EGR2	HEDGEHOG_SIGNALING	0.559965	<2E-16	Positive
EGR2	APOPTOSIS	0.562417	<2E-16	Positive
ANLN	MYC_TARGETS_V1	0.569822	<2E-16	Positive
EGR2	MYOGENESIS	0.570827	<2E-16	Positive
EGR2	ANGIOGENESIS	0.572152	<2E-16	Positive
EGR2	APICAL_JUNCTION	0.57279	<2E-16	Positive
EGR2	COMPLEMENT	0.574578	<2E-16	Positive
EGR2	IL2_STAT5_SIGNALING	0.586095	<2E-16	Positive
PAQR4	G2M_CHECKPOINT	0.596852	<2E-16	Positive
EGR2	KRAS_SIGNALING_UP	0.606118	<2E-16	Positive
ANLN	SPERMATOGENESIS	0.611943	<2E-16	Positive
ANLN	UNFOLDED_PROTEIN_RESPONSE	0.621449	<2E-16	Positive
PAQR4	E2F_TARGETS	0.623025	<2E-16	Positive
EGR2	EPITHELIAL_MESENCHYMAL_TRANSITION	0.634431	<2E-16	Positive
ANLN	MTORC1_SIGNALING	0.721895	<2E-16	Positive
ANLN	E2F_TARGETS	0.749227	<2E-16	Positive
ANLN	MITOTIC_SPINDLE	0.762772	<2E-16	Positive
ANLN	G2M_CHECKPOINT	0.793085	<2E-16	Positive

## Sheet: Table S2
Table S2. Correlation between prognosis-related genes and CC, MF.
Cell Components						Molecular Functions
Gene	CC(Cell Component)	PCC	Pvalue	CC Category	Correlation	Gene	MF(Molecular Function)	PCC	Pvalue	MF category	Correlation
ANLN	GO_BASEMENT_MEMBRANE	0.136044	0.00597912	CC46	Positive	ANLN	GO_GLUTATHIONE_TRANSFERASE_ACTIVITY	-0.451434	<2E-16	MF345	Negative
ANLN	GO_ADA2_GCN5_ADA3_TRANSCRIPTION_ACTIVATOR_COMPLEX	0.444941	<2E-16	CC13	Positive	ANLN	GO_OXIDOREDUCTASE_ACTIVITY_ACTING_ON_A_HEME_GROUP_OF_DONORS	-0.418963	<2E-16	MF616	Negative
ANLN	GO_PSEUDOPODIUM	0.226419	3.95e-06	CC495	Positive	ANLN	GO_MONOOXYGENASE_ACTIVITY	-0.397422	<2E-16	MF531	Negative
ANLN	GO_CHOLINERGIC_SYNAPSE	0.0582652	0.240861	CC84	Positive	ANLN	GO_TETRAPYRROLE_BINDING	-0.393629	<2E-16	MF934	Negative
ANLN	GO_NUCLEOID	0.111079	0.0250275	CC405	Positive	ANLN	GO_INTRAMOLECULAR_TRANSFERASE_ACTIVITY_PHOSPHOTRANSFERASES	0.394085	<2E-16	MF426	Positive
ANLN	GO_MELANOSOME_MEMBRANE	0.117923	0.0173129	CC325	Positive	ANLN	GO_ENDONUCLEASE_ACTIVITY	0.397269	<2E-16	MF270	Positive
ANLN	GO_NUCLEAR_PORE_NUCLEAR_BASKET	0.612479	<2E-16	CC398	Positive	ANLN	GO_TAU_PROTEIN_BINDING	0.405768	<2E-16	MF929	Positive
ANLN	GO_DNA_REPLICATION_FACTOR_A_COMPLEX	0.487714	<2E-16	CC170	Positive	ANLN	GO_ENDODEOXYRIBONUCLEASE_ACTIVITY_PRODUCING_5_PHOSPHOMONOESTERS	0.409659	<2E-16	MF269	Positive
ANLN	GO_CUL4_RING_E3_UBIQUITIN_LIGASE_COMPLEX	0.21728	9.74e-06	CC140	Positive	ANLN	GO_INTRAMOLECULAR_TRANSFERASE_ACTIVITY	0.409823	<2E-16	MF425	Positive
ANLN	GO_GAMMA_TUBULIN_COMPLEX	0.402754	<2E-16	CC231	Positive	ANLN	GO_UBIQUITIN_LIKE_PROTEIN_TRANSFERASE_ACTIVITY	0.409896	<2E-16	MF998	Positive
ANLN	GO_EXTRINSIC_COMPONENT_OF_ENDOSOME_MEMBRANE	0.325301	1.74e-11	CC212	Positive	ANLN	GO_PROTEIN_C_TERMINUS_BINDING	0.421466	<2E-16	MF746	Positive
ANLN	GO_LATERAL_PLASMA_MEMBRANE	0.26548	5.41e-08	CC310	Positive	ANLN	GO_FOLIC_ACID_BINDING	0.423734	<2E-16	MF311	Positive
ANLN	GO_CONDENSED_CHROMOSOME_CENTROMERIC_REGION	0.751695	<2E-16	CC120	Positive	ANLN	GO_UNFOLDED_PROTEIN_BINDING	0.425921	<2E-16	MF1004	Positive
ANLN	GO_HOST_CELL_CYTOPLASM	0.256595	1.53e-07	CC258	Positive	ANLN	GO_EXONUCLEASE_ACTIVITY	0.42962	<2E-16	MF287	Positive
ANLN	GO_TRANS_GOLGI_NETWORK_MEMBRANE	0.161628	0.00106698	CC594	Positive	ANLN	GO_TRANSLATION_INITIATION_FACTOR_BINDING	0.435323	<2E-16	MF966	Positive
ANLN	GO_CELL_LEADING_EDGE	0.262223	7.96e-08	CC75	Positive	ANLN	GO_NUCLEASE_ACTIVITY	0.436926	<2E-16	MF580	Positive
ANLN	GO_SPINDLE_MICROTUBULE	0.782137	<2E-16	CC564	Positive	ANLN	GO_UBIQUITIN_LIKE_PROTEIN_CONJUGATING_ENZYME_ACTIVITY	0.440014	<2E-16	MF993	Positive
ANLN	GO_ISWI_TYPE_COMPLEX	0.302949	4.37e-10	CC296	Positive	ANLN	GO_SINGLE_STRANDED_RNA_BINDING	0.442002	<2E-16	MF869	Positive
ANLN	GO_SODIUM_POTASSIUM_EXCHANGING_ATPASE_COMPLEX	-0.223658	5.21e-06	CC555	Negative	ANLN	GO_MISMATCHED_DNA_BINDING	0.442189	<2E-16	MF520	Positive
ANLN	GO_H4_H2A_HISTONE_ACETYLTRANSFERASE_COMPLEX	0.364934	2.89e-14	CC247	Positive	ANLN	GO_EPIDERMAL_GROWTH_FACTOR_RECEPTOR_BINDING	0.443913	<2E-16	MF280	Positive
ANLN	GO_M_BAND	-0.010578	0.83152	CC317	Negative	ANLN	GO_UBIQUITIN_LIKE_PROTEIN_SPECIFIC_PROTEASE_ACTIVITY	0.444435	<2E-16	MF997	Positive
ANLN	GO_CYTOPLASMIC_EXOSOME_RNASE_COMPLEX	0.122499	0.0133969	CC146	Positive	ANLN	GO_RNA_HELICASE_ACTIVITY	0.447161	<2E-16	MF827	Positive
ANLN	GO_INTRINSIC_COMPONENT_OF_GOLGI_MEMBRANE	0.167409	0.000696569	CC281	Positive	ANLN	GO_CHAPERONE_BINDING	0.447966	<2E-16	MF169	Positive
ANLN	GO_AXONAL_GROWTH_CONE	0.248436	3.85e-07	CC39	Positive	ANLN	GO_NUCLEOTIDASE_ACTIVITY	0.453439	<2E-16	MF591	Positive
ANLN	GO_BLOC_1_COMPLEX	-0.293287	1.62e-09	CC50	Negative	ANLN	GO_GDP_BINDING	0.456241	<2E-16	MF332	Positive
ANLN	GO_SWR1_COMPLEX	0.187976	0.000136368	CC574	Positive	ANLN	GO_SUMO_BINDING	0.458761	<2E-16	MF920	Positive
ANLN	GO_TRIGLYCERIDE_RICH_PLASMA_LIPOPROTEIN_PARTICLE	-0.0377218	0.44789	CC612	Negative	ANLN	GO_METHYL_CPG_BINDING	0.460522	<2E-16	MF506	Positive
ANLN	GO_NUCLEAR_PERIPHERY	0.627552	<2E-16	CC396	Positive	ANLN	GO_PROTEIN_HETERODIMERIZATION_ACTIVITY	0.462192	<2E-16	MF751	Positive
ANLN	GO_NON_MOTILE_CILIUM	0.165333	0.000813144	CC382	Positive	ANLN	GO_RIBONUCLEOPROTEIN_COMPLEX_BINDING	0.479175	<2E-16	MF820	Positive
ANLN	GO_ENDOPLASMIC_RETICULUM_LUMEN	0.123584	0.0125913	CC188	Positive	ANLN	GO_UBIQUITIN_LIKE_PROTEIN_LIGASE_BINDING	0.489427	<2E-16	MF996	Positive
ANLN	GO_INTRINSIC_COMPONENT_OF_ENDOPLASMIC_RETICULUM_MEMBRANE	0.273846	1.96e-08	CC279	Positive	ANLN	GO_GAMMA_TUBULIN_BINDING	0.494303	<2E-16	MF329	Positive
ANLN	GO_CHAPERONE_COMPLEX	0.511799	<2E-16	CC81	Positive	ANLN	GO_DNA_BINDING_BENDING	0.498353	<2E-16	MF241	Positive
ANLN	GO_SPINDLE_POLE	0.790253	<2E-16	CC566	Positive	ANLN	GO_ATP_DEPENDENT_MICROTUBULE_MOTOR_ACTIVITY	0.50315	<2E-16	MF83	Positive
ANLN	GO_TRANSCRIPTIONAL_REPRESSOR_COMPLEX	0.34619	6.67e-13	CC603	Positive	ANLN	GO_KINASE_REGULATOR_ACTIVITY	0.504771	<2E-16	MF442	Positive
ANLN	GO_CLATHRIN_COAT_OF_COATED_PIT	0.426585	<2E-16	CC101	Positive	ANLN	GO_HEAT_SHOCK_PROTEIN_BINDING	0.505972	<2E-16	MF362	Positive
ANLN	GO_TRANSCRIPTION_EXPORT_COMPLEX	-0.0172609	0.728456	CC598	Negative	ANLN	GO_PROTEIN_N_TERMINUS_BINDING	0.512172	<2E-16	MF762	Positive
ANLN	GO_CELL_CORTEX_REGION	0.506853	<2E-16	CC73	Positive	ANLN	GO_HISTONE_BINDING	0.518617	<2E-16	MF373	Positive
ANLN	GO_PLATELET_DENSE_GRANULE_LUMEN	-0.0956704	0.0537845	CC447	Negative	ANLN	GO_KINASE_ACTIVATOR_ACTIVITY	0.526656	<2E-16	MF440	Positive
ANLN	GO_EUCHROMATIN	0.510917	<2E-16	CC201	Positive	ANLN	GO_UBIQUITIN_LIKE_PROTEIN_BINDING	0.530168	<2E-16	MF992	Positive
ANLN	GO_NBAF_COMPLEX	-0.0211619	0.670356	CC372	Negative	ANLN	GO_STRUCTURAL_CONSTITUENT_OF_CYTOSKELETON	0.530908	<2E-16	MF903	Positive
ANLN	GO_PLASMA_MEMBRANE_RAFT	0.217898	9.17e-06	CC441	Positive	ANLN	GO_TELOMERASE_RNA_BINDING	0.541537	<2E-16	MF932	Positive
ANLN	GO_RESPIRATORY_CHAIN_COMPLEX	-0.397805	<2E-16	CC503	Negative	ANLN	GO_5_3_EXONUCLEASE_ACTIVITY	0.560116	<2E-16	MF13	Positive
ANLN	GO_SPANNING_COMPONENT_OF_MEMBRANE	-0.125609	0.0112021	CC556	Negative	ANLN	GO_KINESIN_BINDING	0.56141	<2E-16	MF443	Positive
ANLN	GO_MULTIMERIC_RIBONUCLEASE_P_COMPLEX	-0.0378272	0.446621	CC360	Negative	ANLN	GO_PROTEIN_SERINE_THREONINE_KINASE_ACTIVITY	0.562335	<2E-16	MF770	Positive
ANLN	GO_U1_SNRNP	-0.063771	0.199183	CC613	Negative	ANLN	GO_DNA_DIRECTED_DNA_POLYMERASE_ACTIVITY	0.570439	<2E-16	MF246	Positive
ANLN	GO_CUL4A_RING_E3_UBIQUITIN_LIGASE_COMPLEX	0.260415	9.83e-08	CC141	Positive	ANLN	GO_GDP_DISSOCIATION_INHIBITOR_ACTIVITY	0.572149	<2E-16	MF333	Positive
ANLN	GO_INTEGRAL_COMPONENT_OF_PRESYNAPTIC_ACTIVE_ZONE_MEMBRANE	0.1221	0.0137044	CC270	Positive	ANLN	GO_CYCLIN_DEPENDENT_PROTEIN_SERINE_THREONINE_KINASE_REGULATOR_ACTIVITY	0.572288	<2E-16	MF206	Positive
ANLN	GO_PRESPLICEOSOME	-0.126987	0.0103361	CC470	Negative	ANLN	GO_CYCLIN_DEPENDENT_PROTEIN_KINASE_ACTIVITY	0.573033	<2E-16	MF204	Positive
ANLN	GO_EXOCYTIC_VESICLE	-0.0232793	0.639598	CC207	Negative	ANLN	GO_DOUBLE_STRANDED_RNA_BINDING	0.573124	<2E-16	MF256	Positive
ANLN	GO_GOLGI_TRANSPORT_COMPLEX	-0.0943477	0.0571996	CC245	Negative	ANLN	GO_MOTOR_ACTIVITY	0.579691	<2E-16	MF534	Positive
ANLN	GO_CENTRIOLAR_SATELLITE	0.590018	<2E-16	CC79	Positive	ANLN	GO_SIGNAL_SEQUENCE_BINDING	0.584601	<2E-16	MF865	Positive
ANLN	GO_SEX_CHROMOSOME	0.5021	<2E-16	CC539	Positive	ANLN	GO_DNA_POLYMERASE_ACTIVITY	0.600421	<2E-16	MF249	Positive
ANLN	GO_ACTIN_CYTOSKELETON	0.238015	1.19e-06	CC9	Positive	ANLN	GO_NUCLEAR_LOCALIZATION_SEQUENCE_BINDING	0.606377	<2E-16	MF577	Positive
ANLN	GO_BRUSH_BORDER_MEMBRANE	0.232033	2.23e-06	CC55	Positive	ANLN	GO_ADP_BINDING	0.612935	<2E-16	MF40	Positive
ANLN	GO_CLATHRIN_VESICLE_COAT	0.309968	1.63e-10	CC109	Positive	ANLN	GO_RAN_GTPASE_BINDING	0.622069	<2E-16	MF801	Positive
ANLN	GO_FIBRILLAR_CENTER	0.27919	1.01e-08	CC219	Positive	ANLN	GO_DAMAGED_DNA_BINDING	0.626351	<2E-16	MF222	Positive
ANLN	GO_CILIARY_TRANSITION_ZONE	0.15194	0.00211418	CC97	Positive	ANLN	GO_FOUR_WAY_JUNCTION_DNA_BINDING	0.633303	<2E-16	MF312	Positive
ANLN	GO_CHROMOSOMAL_REGION	0.743715	<2E-16	CC87	Positive	ANLN	GO_PROTEASOME_BINDING	0.634448	<2E-16	MF742	Positive
ANLN	GO_CHLORIDE_CHANNEL_COMPLEX	0.213421	1.41e-05	CC83	Positive	ANLN	GO_HELICASE_ACTIVITY	0.640273	<2E-16	MF363	Positive
ANLN	GO_FLEMMING_BODY	0.569447	<2E-16	CC227	Positive	ANLN	GO_MAGNESIUM_ION_BINDING	0.642388	<2E-16	MF485	Positive
ANLN	GO_CAVEOLA	0.202907	3.73e-05	CC66	Positive	ANLN	GO_MICROTUBULE_MOTOR_ACTIVITY	0.644598	<2E-16	MF515	Positive
ANLN	GO_ASTER	0.580555	<2E-16	CC30	Positive	ANLN	GO_DNA_SECONDARY_STRUCTURE_BINDING	0.653387	<2E-16	MF252	Positive
ANLN	GO_PROTON_TRANSPORTING_TWO_SECTOR_ATPASE_COMPLEX_CATALYTIC_DOMAIN	0.110892	0.0252738	CC490	Positive	ANLN	GO_SINGLE_STRANDED_DNA_BINDING	0.668688	<2E-16	MF867	Positive
ANLN	GO_POST_MRNA_RELEASE_SPLICEOSOMAL_COMPLEX	0.120743	0.0147961	CC455	Positive	ANLN	GO_DNA_DEPENDENT_ATPASE_ACTIVITY	0.680384	<2E-16	MF245	Positive
ANLN	GO_POSTSYNAPTIC_MEMBRANE	0.102146	0.0394203	CC461	Positive	ANLN	GO_TUBULIN_BINDING	0.683339	<2E-16	MF985	Positive
ANLN	GO_PLATELET_DENSE_TUBULAR_NETWORK	0.278311	1.13e-08	CC448	Positive	ANLN	GO_PROTEIN_SERINE_THREONINE_KINASE_ACTIVATOR_ACTIVITY	0.68409	<2E-16	MF769	Positive
ANLN	GO_CYCLIN_DEPENDENT_PROTEIN_KINASE_HOLOENZYME_COMPLEX	0.738618	<2E-16	CC143	Positive	ANLN	GO_ATPASE_ACTIVITY_COUPLED	0.688357	<2E-16	MF89	Positive
ANLN	GO_EXON_EXON_JUNCTION_COMPLEX	0.249349	3.48e-07	CC208	Positive	ANLN	GO_STRUCTURAL_CONSTITUENT_OF_NUCLEAR_PORE	0.691301	<2E-16	MF907	Positive
ANLN	GO_CATION_CHANNEL_COMPLEX	-0.144647	0.00344934	CC64	Negative	ANLN	GO_ANNEALING_ACTIVITY	0.691519	<2E-16	MF72	Positive
ANLN	GO_SCHAFFER_COLLATERAL_CA1_SYNAPSE	0.102167	0.0393805	CC531	Positive	ANLN	GO_MICROTUBULE_BINDING	0.705072	<2E-16	MF513	Positive
ANLN	GO_ORGANELLE_INNER_MEMBRANE	-0.152146	0.00208444	CC411	Negative	ANLN	GO_3_5_DNA_HELICASE_ACTIVITY	0.708719	<2E-16	MF9	Positive
ANLN	GO_CCR4_NOT_COMPLEX	0.106436	0.031812	CC67	Positive	ANLN	GO_PHOSPHATIDYLINOSITOL_PHOSPHATE_KINASE_ACTIVITY	0.392666	2.22e-16	MF696	Positive
ANLN	GO_SIN3_TYPE_COMPLEX	0.18747	0.000142253	CC541	Positive	ANLN	GO_RECEPTOR_SERINE_THREONINE_KINASE_BINDING	-0.387837	4.44e-16	MF805	Negative
ANLN	GO_SWI_SNF_COMPLEX	-0.0218418	0.660416	CC573	Negative	ANLN	GO_FATTY_ACID_LIGASE_ACTIVITY	-0.387745	4.44e-16	MF300	Negative
ANLN	GO_PROTEASOME_CORE_COMPLEX	0.298542	7.99e-10	CC479	Positive	ANLN	GO_GLUTATHIONE_PEROXIDASE_ACTIVITY	-0.386699	4.44e-16	MF344	Negative
ANLN	GO_PRP19_COMPLEX	0.170141	0.000566711	CC494	Positive	ANLN	GO_MICROFILAMENT_MOTOR_ACTIVITY	0.387878	4.44e-16	MF512	Positive
ANLN	GO_SYNAPTONEMAL_STRUCTURE	0.426814	<2E-16	CC579	Positive	ANLN	GO_PHOSPHOPROTEIN_BINDING	0.383892	8.88e-16	MF708	Positive
ANLN	GO_PRESYNAPTIC_CYTOSOL	0.42859	<2E-16	CC475	Positive	ANLN	GO_GTPASE_ACTIVITY	0.384587	8.88e-16	MF355	Positive
ANLN	GO_INTRINSIC_COMPONENT_OF_MITOCHONDRIAL_OUTER_MEMBRANE	-0.00562664	0.9099	CC284	Negative	ANLN	GO_RIBONUCLEASE_ACTIVITY	0.38535	8.88e-16	MF818	Positive
ANLN	GO_PARALLEL_FIBER_TO_PURKINJE_CELL_SYNAPSE	0.0213968	0.666915	CC419	Positive	ANLN	GO_APOLIPOPROTEIN_BINDING	0.383059	1.11e-15	MF76	Positive
ANLN	GO_ER_TO_GOLGI_TRANSPORT_VESICLE_MEMBRANE	0.348912	4.28e-13	CC196	Positive	ANLN	GO_L_AMINO_ACID_TRANSMEMBRANE_TRANSPORTER_ACTIVITY	0.383094	1.11e-15	MF444	Positive
ANLN	GO_FICOLIN_1_RICH_GRANULE	0.484394	<2E-16	CC221	Positive	ANLN	GO_CYSTEINE_TYPE_PEPTIDASE_ACTIVITY	0.382401	1.33e-15	MF215	Positive
ANLN	GO_NUCLEAR_MEMBRANE	0.658633	<2E-16	CC394	Positive	ANLN	GO_OXIDOREDUCTASE_ACTIVITY_ACTING_ON_NAD_P_H	-0.38123	1.55e-15	MF622	Negative
ANLN	GO_ENDOPLASMIC_RETICULUM_TUBULAR_NETWORK	0.228975	3.05e-06	CC191	Positive	ANLN	GO_CARBOHYDRATE_KINASE_ACTIVITY	0.380341	1.78e-15	MF137	Positive
ANLN	GO_BLOC_COMPLEX	-0.211278	1.72e-05	CC51	Negative	ANLN	GO_LAMIN_BINDING	0.376653	3.55e-15	MF447	Positive
ANLN	GO_OXIDOREDUCTASE_COMPLEX	-0.294031	1.47e-09	CC416	Negative	ANLN	GO_PHOSPHOLIPASE_BINDING	0.373845	6e-15	MF702	Positive
ANLN	GO_MKS_COMPLEX	-0.0127067	0.798284	CC354	Negative	ANLN	GO_P53_BINDING	0.37279	7.11e-15	MF643	Positive
ANLN	GO_RIBBON_SYNAPSE	0.0638564	0.198581	CC507	Positive	ANLN	GO_TRANSLATION_REPRESSOR_ACTIVITY	0.370708	1.07e-14	MF969	Positive
ANLN	GO_CILIARY_BASAL_BODY	0.303174	4.24e-10	CC91	Positive	ANLN	GO_NADPH_BINDING	0.366927	2.04e-14	MF553	Positive
ANLN	GO_JUXTAPARANODE_REGION_OF_AXON	-0.0763296	0.124195	CC297	Negative	ANLN	GO_TRANSLATION_REGULATOR_ACTIVITY	0.366791	2.09e-14	MF967	Positive
ANLN	GO_VACUOLAR_PROTON_TRANSPORTING_V_TYPE_ATPASE_COMPLEX	0.118995	0.0163147	CC624	Positive	ANLN	GO_GUANYL_NUCLEOTIDE_BINDING	0.366104	2.35e-14	MF358	Positive
ANLN	GO_PROTEIN_DNA_COMPLEX	0.627609	<2E-16	CC484	Positive	ANLN	GO_PROTEIN_PHOSPHATASE_BINDING	0.364625	3.04e-14	MF766	Positive
ANLN	GO_TRANSPORT_VESICLE	0.167303	0.000702107	CC607	Positive	ANLN	GO_PROTEIN_TYROSINE_PHOSPHATASE_ACTIVITY	0.363629	3.6e-14	MF778	Positive
ANLN	GO_PRERIBOSOME_SMALL_SUBUNIT_PRECURSOR	0.336972	2.9e-12	CC469	Positive	ANLN	GO_LYSOPHOSPHOLIPASE_ACTIVITY	-0.363597	3.64e-14	MF481	Negative
ANLN	GO_EXTRINSIC_COMPONENT_OF_MITOCHONDRIAL_INNER_MEMBRANE	-0.199378	5.11e-05	CC214	Negative	ANLN	GO_LOW_DENSITY_LIPOPROTEIN_PARTICLE_RECEPTOR_BINDING	0.361861	4.88e-14	MF474	Positive
ANLN	GO_NUCLEAR_CYCLIN_DEPENDENT_PROTEIN_KINASE_HOLOENZYME_COMPLEX	0.356802	1.15e-13	CC385	Positive	ANLN	GO_RHO_GTPASE_BINDING	0.357875	9.64e-14	MF816	Positive
ANLN	GO_CELL_DIVISION_SITE	0.659443	<2E-16	CC74	Positive	ANLN	GO_CORE_PROMOTER_BINDING	0.356838	1.15e-13	MF193	Positive
ANLN	GO_VOLTAGE_GATED_CALCIUM_CHANNEL_COMPLEX	-0.385878	6.66e-16	CC628	Negative	ANLN	GO_PRENYLTRANSFERASE_ACTIVITY	0.355052	1.55e-13	MF735	Positive
ANLN	GO_GAP_JUNCTION	0.0676754	0.172989	CC232	Positive	ANLN	GO_RAC_GTPASE_BINDING	0.354841	1.61e-13	MF795	Positive
ANLN	GO_POSTSYNAPTIC_DENSITY_MEMBRANE	-0.0389397	0.433357	CC458	Negative	ANLN	GO_ACTIN_DEPENDENT_ATPASE_ACTIVITY	0.353659	1.96e-13	MF25	Positive
ANLN	GO_ENDOSOME_LUMEN	0.0864146	0.0816404	CC193	Positive	ANLN	GO_GTPASE_ACTIVATING_PROTEIN_BINDING	0.352558	2.35e-13	MF354	Positive
ANLN	GO_NEURON_TO_NEURON_SYNAPSE	0.12544	0.0113126	CC378	Positive	ANLN	GO_PHOSPHATIDYLINOSITOL_3_KINASE_ACTIVITY	0.349984	3.59e-13	MF680	Positive
ANLN	GO_GOLGI_CISTERNA	0.08848	0.0745821	CC241	Positive	ANLN	GO_OXIDOREDUCTASE_ACTIVITY_ACTING_ON_PEROXIDE_AS_ACCEPTOR	-0.349301	4.02e-13	MF629	Negative
ANLN	GO_MICROBODY	-0.212119	1.59e-05	CC332	Negative	ANLN	GO_LIPASE_INHIBITOR_ACTIVITY	0.34339	1.05e-12	MF462	Positive
ANLN	GO_SMN_COMPLEX	0.245998	5.03e-07	CC550	Positive	ANLN	GO_PHOSPHOLIPASE_INHIBITOR_ACTIVITY	0.341518	1.41e-12	MF704	Positive
ANLN	GO_COSTAMERE	0.272116	2.43e-08	CC137	Positive	ANLN	GO_POLY_PURINE_TRACT_BINDING	0.340142	1.76e-12	MF721	Positive
ANLN	GO_GEMINI_OF_COILED_BODIES	0.193276	8.7e-05	CC233	Positive	ANLN	GO_RNA_POLYMERASE_II_CORE_PROMOTER_SEQUENCE_SPECIFIC_DNA_BINDING	0.338786	2.18e-12	MF835	Positive
ANLN	GO_CHROMOSOME_CENTROMERIC_REGION	0.781636	<2E-16	CC88	Positive	ANLN	GO_NUCLEOSOME_BINDING	0.337534	2.65e-12	MF590	Positive
ANLN	GO_L_TYPE_VOLTAGE_GATED_CALCIUM_CHANNEL_COMPLEX	-0.178503	0.000295517	CC301	Negative	ANLN	GO_AMIDE_BINDING	0.337083	2.85e-12	MF54	Positive
ANLN	GO_INTRINSIC_COMPONENT_OF_NUCLEAR_INNER_MEMBRANE	0.21172	1.65e-05	CC285	Positive	ANLN	GO_CHROMATIN_DNA_BINDING	0.336286	3.23e-12	MF180	Positive
ANLN	GO_ORGANELLAR_RIBOSOME	-0.0851316	0.0862906	CC409	Negative	ANLN	GO_HSP70_PROTEIN_BINDING	0.333334	5.11e-12	MF387	Positive
ANLN	GO_COPII_VESICLE_COAT	0.344663	8.54e-13	CC133	Positive	ANLN	GO_ENDONUCLEASE_ACTIVITY_ACTIVE_WITH_EITHER_RIBO_OR_DEOXYRIBONUCLEIC_ACIDS_AND_PRODUCING_5_PHOSPHOMONOESTERS	0.333095	5.3e-12	MF272	Positive
ANLN	GO_9PLUS2_MOTILE_CILIUM	-0.200153	4.77e-05	CC3	Negative	ANLN	GO_TRANSITION_METAL_ION_TRANSMEMBRANE_TRANSPORTER_ACTIVITY	0.333021	5.36e-12	MF961	Positive
ANLN	GO_ACROSOMAL_VESICLE	0.156911	0.00149572	CC7	Positive	ANLN	GO_OXIDOREDUCTASE_ACTIVITY_ACTING_ON_THE_CH_NH_GROUP_OF_DONORS_NAD_OR_NADP_AS_ACCEPTOR	0.331909	6.37e-12	MF636	Positive
ANLN	GO_CONDENSED_NUCLEAR_CHROMOSOME_CENTROMERIC_REGION	0.696268	<2E-16	CC123	Positive	ANLN	GO_PHOTORECEPTOR_ACTIVITY	0.330184	8.3e-12	MF716	Positive
ANLN	GO_NUCLEAR_SPECK	0.310908	1.43e-10	CC401	Positive	ANLN	GO_PROTEASE_BINDING	0.329765	8.85e-12	MF741	Positive
ANLN	GO_COPI_VESICLE_COAT	0.289408	2.71e-09	CC131	Positive	ANLN	GO_RNA_CAP_BINDING	0.328654	1.05e-11	MF826	Positive
ANLN	GO_GABA_RECEPTOR_COMPLEX	-0.0477488	0.336612	CC230	Negative	ANLN	GO_STEROID_HYDROXYLASE_ACTIVITY	-0.328304	1.11e-11	MF899	Negative
ANLN	GO_MULTIVESICULAR_BODY_MEMBRANE	-0.00415471	0.933406	CC362	Negative	ANLN	GO_MISFOLDED_PROTEIN_BINDING	0.328273	1.11e-11	MF518	Positive
ANLN	GO_SODIUM_CHANNEL_COMPLEX	-0.2914	2.08e-09	CC554	Negative	ANLN	GO_STEROID_HORMONE_RECEPTOR_ACTIVITY	-0.327401	1.27e-11	MF897	Negative
ANLN	GO_PRESYNAPTIC_ACTIVE_ZONE	0.157143	0.00147138	CC472	Positive	ANLN	GO_CARBON_NITROGEN_LIGASE_ACTIVITY_WITH_GLUTAMINE_AS_AMIDO_N_DONOR	0.325673	1.65e-11	MF141	Positive
ANLN	GO_EXORIBONUCLEASE_COMPLEX	0.114682	0.0206594	CC209	Positive	ANLN	GO_WATER_TRANSMEMBRANE_TRANSPORTER_ACTIVITY	-0.324075	2.09e-11	MF1021	Negative
ANLN	GO_INTERSTITIAL_MATRIX	0.141386	0.00426392	CC276	Positive	ANLN	GO_WIDE_PORE_CHANNEL_ACTIVITY	0.323952	2.13e-11	MF1022	Positive
ANLN	GO_SYNAPTIC_VESICLE_MEMBRANE	-0.112721	0.0229464	CC578	Negative	ANLN	GO_PROLINE_RICH_REGION_BINDING	0.323316	2.34e-11	MF738	Positive
ANLN	GO_SPECIFIC_GRANULE_LUMEN	0.210572	1.84e-05	CC558	Positive	ANLN	GO_PHOSPHATIDYLINOSITOL_KINASE_ACTIVITY	0.323116	2.41e-11	MF692	Positive
ANLN	GO_MLL1_2_COMPLEX	0.447964	<2E-16	CC355	Positive	ANLN	GO_QUINONE_BINDING	-0.321904	2.89e-11	MF791	Negative
ANLN	GO_SMALL_NUCLEOLAR_RIBONUCLEOPROTEIN_COMPLEX	0.140894	0.00440083	CC547	Positive	ANLN	GO_DEOXYRIBONUCLEASE_ACTIVITY	0.321598	3.02e-11	MF230	Positive
ANLN	GO_AXONEMAL_DYNEIN_COMPLEX	0.0575378	0.246795	CC40	Positive	ANLN	GO_3_5_EXONUCLEASE_ACTIVITY	0.321351	3.14e-11	MF11	Positive
ANLN	GO_PROTON_TRANSPORTING_TWO_SECTOR_ATPASE_COMPLEX_PROTON_TRANSPORTING_DOMAIN	-0.037218	0.45398	CC491	Negative	ANLN	GO_TRANSLATION_REGULATOR_ACTIVITY_NUCLEIC_ACID_BINDING	0.321282	3.17e-11	MF968	Positive
ANLN	GO_TRANS_GOLGI_NETWORK	0.250827	2.95e-07	CC593	Positive	ANLN	GO_AMINO_ACID_TRANSMEMBRANE_TRANSPORTER_ACTIVITY	0.321177	3.22e-11	MF60	Positive
ANLN	GO_PRERIBOSOME	0.237874	1.21e-06	CC467	Positive	ANLN	GO_PHOSPHATASE_BINDING	0.319001	4.44e-11	MF668	Positive
ANLN	GO_ORGANELLE_SUBCOMPARTMENT	0.226621	3.87e-06	CC413	Positive	ANLN	GO_THREONINE_TYPE_PEPTIDASE_ACTIVITY	0.318476	4.79e-11	MF938	Positive
ANLN	GO_ENDONUCLEASE_COMPLEX	0.188498	0.000130532	CC182	Positive	ANLN	GO_CHANNEL_INHIBITOR_ACTIVITY	0.318338	4.89e-11	MF167	Positive
ANLN	GO_NUCLEAR_INNER_MEMBRANE	0.553087	<2E-16	CC391	Positive	ANLN	GO_METHYLATED_HISTONE_BINDING	0.318057	5.09e-11	MF507	Positive
ANLN	GO_TRANSFERASE_COMPLEX_TRANSFERRING_PHOSPHORUS_CONTAINING_GROUPS	0.626876	<2E-16	CC605	Positive	ANLN	GO_DIVALENT_INORGANIC_CATION_TRANSMEMBRANE_TRANSPORTER_ACTIVITY	0.317183	5.79e-11	MF239	Positive
ANLN	GO_PRESYNAPTIC_MEMBRANE	0.150509	0.00233118	CC476	Positive	ANLN	GO_MHC_CLASS_I_PROTEIN_BINDING	0.316145	6.73e-11	MF508	Positive
ANLN	GO_RNA_POLYMERASE_III_TRANSCRIPTION_FACTOR_COMPLEX	0.337991	2.47e-12	CC519	Positive	ANLN	GO_SOLUTE_PROTON_ANTIPORTER_ACTIVITY	0.315859	7.02e-11	MF889	Positive
ANLN	GO_CYTOPLASMIC_STRESS_GRANULE	0.337187	2.8e-12	CC151	Positive	ANLN	GO_ENDORIBONUCLEASE_ACTIVITY_PRODUCING_5_PHOSPHOMONOESTERS	0.315841	7.04e-11	MF276	Positive
ANLN	GO_TRANS_GOLGI_NETWORK_TRANSPORT_VESICLE_MEMBRANE	0.124797	0.0117424	CC596	Positive	ANLN	GO_STEROID_HORMONE_RECEPTOR_BINDING	0.315521	7.37e-11	MF898	Positive
ANLN	GO_REPLICATION_FORK	0.716839	<2E-16	CC500	Positive	ANLN	GO_ESTROGEN_RECEPTOR_BINDING	0.314536	8.5e-11	MF282	Positive
ANLN	GO_LIPID_DROPLET	0.0919052	0.0639775	CC312	Positive	ANLN	GO_POTASSIUM_ION_BINDING	0.312315	1.17e-10	MF730	Positive
ANLN	GO_MITOTIC_SPINDLE_POLE	0.736454	<2E-16	CC353	Positive	ANLN	GO_ADENYLYLTRANSFERASE_ACTIVITY	0.311699	1.28e-10	MF39	Positive
ANLN	GO_EARLY_ENDOSOME_MEMBRANE	0.265732	5.25e-08	CC174	Positive	ANLN	GO_PROTEIN_SERINE_THREONINE_PHOSPHATASE_ACTIVITY	0.311158	1.38e-10	MF772	Positive
ANLN	GO_RNA_POLYMERASE_COMPLEX	0.371662	8.88e-15	CC513	Positive	ANLN	GO_HISTONE_DEACETYLASE_BINDING	0.311113	1.39e-10	MF375	Positive
ANLN	GO_HETEROTRIMERIC_G_PROTEIN_COMPLEX	0.272909	2.2e-08	CC252	Positive	ANLN	GO_PEPTIDASE_ACTIVATOR_ACTIVITY	0.31104	1.4e-10	MF650	Positive
ANLN	GO_PIGMENT_GRANULE	0.483687	<2E-16	CC439	Positive	ANLN	GO_PROTEIN_SELF_ASSOCIATION	0.309473	1.75e-10	MF768	Positive
ANLN	GO_RESPIRASOME	-0.415451	<2E-16	CC502	Negative	ANLN	GO_PROTEIN_SERINE_THREONINE_TYROSINE_KINASE_ACTIVITY	0.309406	1.77e-10	MF774	Positive
ANLN	GO_BASAL_PLASMA_MEMBRANE	-0.0586641	0.23765	CC45	Negative	ANLN	GO_INSULIN_RECEPTOR_SUBSTRATE_BINDING	0.308833	1.92e-10	MF416	Positive
ANLN	GO_CYTOPLASMIC_SIDE_OF_MEMBRANE	0.22443	4.83e-06	CC150	Positive	ANLN	GO_STRUCTURAL_CONSTITUENT_OF_RIBOSOME	-0.308497	2.01e-10	MF909	Negative
ANLN	GO_CD40_RECEPTOR_COMPLEX	0.282845	6.34e-09	CC68	Positive	ANLN	GO_VITAMIN_D_RECEPTOR_BINDING	0.308336	2.06e-10	MF1010	Positive
ANLN	GO_MICROBODY_LUMEN	-0.356868	1.14e-13	CC333	Negative	ANLN	GO_LIPOPROTEIN_PARTICLE_RECEPTOR_BINDING	0.305764	2.95e-10	MF468	Positive
ANLN	GO_CLATHRIN_SCULPTED_VESICLE	0.128165	0.00964316	CC108	Positive	ANLN	GO_QUATERNARY_AMMONIUM_GROUP_BINDING	0.30497	3.3e-10	MF789	Positive
ANLN	GO_HAPTOGLOBIN_HEMOGLOBIN_COMPLEX	-0.149301	0.00253007	CC249	Negative	ANLN	GO_CARBOXYLIC_ESTER_HYDROLASE_ACTIVITY	-0.303683	3.95e-10	MF146	Negative
ANLN	GO_CILIARY_ROOTLET	0.1999	4.88e-05	CC95	Positive	ANLN	GO_TELOMERIC_DNA_BINDING	0.303669	3.96e-10	MF933	Positive
ANLN	GO_MITOCHONDRIAL_SMALL_RIBOSOMAL_SUBUNIT	-0.0315297	0.525893	CC350	Negative	ANLN	GO_HYDROLASE_ACTIVITY_ACTING_ON_CARBON_NITROGEN_BUT_NOT_PEPTIDE_BONDS_IN_LINEAR_AMIDES	-0.301413	5.4e-10	MF395	Negative
ANLN	GO_PRECATALYTIC_SPLICEOSOME	0.259073	1.15e-07	CC466	Positive	ANLN	GO_SNAP_RECEPTOR_ACTIVITY	0.300467	6.15e-10	MF874	Positive
ANLN	GO_NUCLEAR_LAMINA	0.450594	<2E-16	CC392	Positive	ANLN	GO_G_PROTEIN_ALPHA_SUBUNIT_BINDING	0.295823	1.15e-09	MF315	Positive
ANLN	GO_CORTICAL_ACTIN_CYTOSKELETON	0.133619	0.00694459	CC135	Positive	ANLN	GO_N_ACYLTRANSFERASE_ACTIVITY	0.295117	1.27e-09	MF546	Positive
ANLN	GO_LAMININ_COMPLEX	0.158116	0.00137328	CC305	Positive	ANLN	GO_OXYGEN_BINDING	-0.294068	1.46e-09	MF641	Negative
ANLN	GO_EUKARYOTIC_48S_PREINITIATION_COMPLEX	0.119691	0.0156946	CC202	Positive	ANLN	GO_UBIQUITIN_LIKE_PROTEIN_LIGASE_ACTIVITY	0.293758	1.52e-09	MF995	Positive
ANLN	GO_TERTIARY_GRANULE	0.205937	2.83e-05	CC585	Positive	ANLN	GO_CYSTEINE_TYPE_ENDOPEPTIDASE_ACTIVITY	0.293721	1.53e-09	MF209	Positive
ANLN	GO_ACETYLCHOLINE_GATED_CHANNEL_COMPLEX	0.166312	0.000756085	CC5	Positive	ANLN	GO_ALKALI_METAL_ION_BINDING	0.293611	1.55e-09	MF50	Positive
ANLN	GO_MITOCHONDRIA_ASSOCIATED_ENDOPLASMIC_RETICULUM_MEMBRANE	0.338882	2.15e-12	CC345	Positive	ANLN	GO_GLUCOSIDASE_ACTIVITY	0.291173	2.15e-09	MF338	Positive
ANLN	GO_PLATELET_ALPHA_GRANULE_MEMBRANE	0.195095	7.44e-05	CC445	Positive	ANLN	GO_CALMODULIN_BINDING	0.291084	2.17e-09	MF129	Positive
ANLN	GO_HISTONE_METHYLTRANSFERASE_COMPLEX	0.357401	1.04e-13	CC256	Positive	ANLN	GO_TRANSLATION_INITIATION_FACTOR_ACTIVITY	0.29053	2.34e-09	MF965	Positive
ANLN	GO_RESPIRATORY_CHAIN_COMPLEX_III	-0.306657	2.61e-10	CC504	Negative	ANLN	GO_FATTY_ACID_BINDING	-0.28969	2.61e-09	MF298	Negative
ANLN	GO_SECONDARY_LYSOSOME	0.164508	0.000864295	CC533	Positive	ANLN	GO_SPECTRIN_BINDING	0.287572	3.44e-09	MF892	Positive
ANLN	GO_RUFFLE	0.296393	1.07e-09	CC523	Positive	ANLN	GO_MAP_KINASE_ACTIVITY	0.287193	3.62e-09	MF491	Positive
ANLN	GO_COP9_SIGNALOSOME	0.352695	2.3e-13	CC128	Positive	ANLN	GO_PROTEIN_PHOSPHORYLATED_AMINO_ACID_BINDING	0.286442	3.99e-09	MF767	Positive
ANLN	GO_TERTIARY_GRANULE_LUMEN	0.106467	0.0317628	CC586	Positive	ANLN	GO_RETINOIC_ACID_RECEPTOR_BINDING	0.286336	4.04e-09	MF812	Positive
ANLN	GO_COMPLEX_OF_COLLAGEN_TRIMERS	0.184123	0.000187649	CC118	Positive	ANLN	GO_PEPTIDE_N_ACETYLTRANSFERASE_ACTIVITY	0.28426	5.28e-09	MF659	Positive
ANLN	GO_ANCHORED_COMPONENT_OF_MEMBRANE	-0.0292313	0.556511	CC19	Negative	ANLN	GO_MAP_KINASE_KINASE_ACTIVITY	0.281231	7.78e-09	MF492	Positive
ANLN	GO_CALCIUM_CHANNEL_COMPLEX	-0.300051	6.51e-10	CC57	Negative	ANLN	GO_CATECHOLAMINE_BINDING	-0.280886	8.13e-09	MF158	Negative
ANLN	GO_ENDOCYTIC_VESICLE_LUMEN	0.217354	9.67e-06	CC178	Positive	ANLN	GO_BETA_TUBULIN_BINDING	0.279052	1.03e-08	MF100	Positive
ANLN	GO_PROTEIN_ACETYLTRANSFERASE_COMPLEX	0.333204	5.21e-12	CC482	Positive	ANLN	GO_ACETYLTRANSFERASE_ACTIVITY	0.278451	1.11e-08	MF21	Positive
ANLN	GO_TRICARBOXYLIC_ACID_CYCLE_ENZYME_COMPLEX	0.193183	8.77e-05	CC611	Positive	ANLN	GO_MAP_KINASE_KINASE_KINASE_ACTIVITY	0.277888	1.19e-08	MF493	Positive
ANLN	GO_VACUOLAR_MEMBRANE	0.164761	0.000848325	CC623	Positive	ANLN	GO_TRANSLATION_FACTOR_ACTIVITY_RNA_BINDING	0.277727	1.21e-08	MF964	Positive
ANLN	GO_SYNAPTIC_CLEFT	-0.065351	0.188255	CC576	Negative	ANLN	GO_PEPTIDOGLYCAN_BINDING	0.277477	1.25e-08	MF662	Positive
ANLN	GO_CLUSTER_OF_ACTIN_BASED_CELL_PROJECTIONS	0.232743	2.07e-06	CC111	Positive	ANLN	GO_PROTEIN_TYROSINE_SERINE_THREONINE_PHOSPHATASE_ACTIVITY	0.276298	1.45e-08	MF779	Positive
ANLN	GO_DISTAL_AXON	0.270804	2.85e-08	CC165	Positive	ANLN	GO_PHOSPHATIDYLINOSITOL_BINDING	0.276096	1.48e-08	MF689	Positive
ANLN	GO_RUFFLE_MEMBRANE	0.0892684	0.0720224	CC524	Positive	ANLN	GO_LIGASE_ACTIVITY_FORMING_CARBON_NITROGEN_BONDS	0.276144	1.48e-08	MF457	Positive
ANLN	GO_PROTEIN_LIPID_COMPLEX	0.088417	0.0747899	CC486	Positive	ANLN	GO_GROWTH_FACTOR_RECEPTOR_BINDING	0.275925	1.52e-08	MF351	Positive
ANLN	GO_CONDENSED_NUCLEAR_CHROMOSOME	0.697214	<2E-16	CC122	Positive	ANLN	GO_CYTOSKELETAL_ADAPTOR_ACTIVITY	0.272649	2.27e-08	MF221	Positive
ANLN	GO_PROTEIN_KINASE_COMPLEX	0.622645	<2E-16	CC485	Positive	ANLN	GO_HORMONE_RECEPTOR_BINDING	0.271026	2.77e-08	MF386	Positive
ANLN	GO_PLATELET_ALPHA_GRANULE	0.145346	0.00329427	CC443	Positive	ANLN	GO_SOLUTE_CATION_ANTIPORTER_ACTIVITY	0.26844	3.79e-08	MF887	Positive
ANLN	GO_ENDOCYTIC_VESICLE	0.224118	4.98e-06	CC177	Positive	ANLN	GO_14_3_3_PROTEIN_BINDING	0.26785	4.07e-08	MF4	Positive
ANLN	GO_PODOSOME	0.270465	2.97e-08	CC450	Positive	ANLN	GO_SH3_DOMAIN_BINDING	0.267814	4.09e-08	MF861	Positive
ANLN	GO_TIGHT_JUNCTION	0.164831	0.000843935	CC589	Positive	ANLN	GO_RAGE_RECEPTOR_BINDING	0.267036	4.49e-08	MF799	Positive
ANLN	GO_CILIARY_MEMBRANE	0.0402988	0.417466	CC93	Positive	ANLN	GO_NUCLEOSOMAL_DNA_BINDING	0.266943	4.54e-08	MF589	Positive
ANLN	GO_REGION_OF_CYTOSOL	0.563625	<2E-16	CC499	Positive	ANLN	GO_VOLTAGE_GATED_ANION_CHANNEL_ACTIVITY	0.266851	4.59e-08	MF1012	Positive
ANLN	GO_LUMENAL_SIDE_OF_ENDOPLASMIC_RETICULUM_MEMBRANE	0.0768812	0.121492	CC314	Positive	ANLN	GO_NAD_DEPENDENT_PROTEIN_DEACETYLASE_ACTIVITY	-0.266433	4.83e-08	MF549	Negative
ANLN	GO_EXTRINSIC_COMPONENT_OF_SYNAPTIC_MEMBRANE	0.341663	1.38e-12	CC217	Positive	ANLN	GO_ATPASE_REGULATOR_ACTIVITY	0.263906	6.52e-08	MF94	Positive
ANLN	GO_SAGA_TYPE_COMPLEX	0.174517	0.000404553	CC526	Positive	ANLN	GO_MODIFIED_AMINO_ACID_BINDING	0.262336	7.85e-08	MF525	Positive
ANLN	GO_VESICLE_LUMEN	0.311867	1.25e-10	CC626	Positive	ANLN	GO_CLATHRIN_BINDING	0.258263	1.26e-07	MF183	Positive
ANLN	GO_BETA_CATENIN_TCF_COMPLEX	0.0106235	0.830807	CC49	Positive	ANLN	GO_ENDORIBONUCLEASE_ACTIVITY	0.257388	1.4e-07	MF275	Positive
ANLN	GO_EUKARYOTIC_TRANSLATION_INITIATION_FACTOR_4F_COMPLEX	0.325336	1.73e-11	CC204	Positive	ANLN	GO_NITRIC_OXIDE_SYNTHASE_BINDING	0.255621	1.71e-07	MF571	Positive
ANLN	GO_POLYSOMAL_RIBOSOME	-0.260596	9.63e-08	CC452	Negative	ANLN	GO_ESTRADIOL_17_BETA_DEHYDROGENASE_ACTIVITY	-0.254723	1.9e-07	MF281	Negative
ANLN	GO_IMMUNOGLOBULIN_COMPLEX_CIRCULATING	0.0182451	0.713634	CC263	Positive	ANLN	GO_DEACETYLASE_ACTIVITY	-0.254606	1.92e-07	MF223	Negative
ANLN	GO_CLATHRIN_ADAPTOR_COMPLEX	0.0504387	0.310069	CC99	Positive	ANLN	GO_CXCR_CHEMOKINE_RECEPTOR_BINDING	0.251527	2.72e-07	MF197	Positive
ANLN	GO_AUTOPHAGOSOME_MEMBRANE	0.122989	0.0130275	CC35	Positive	ANLN	GO_LIPOPROTEIN_PARTICLE_RECEPTOR_ACTIVITY	0.251217	2.82e-07	MF467	Positive
ANLN	GO_PROTON_TRANSPORTING_V_TYPE_ATPASE_V0_DOMAIN	0.0077066	0.876822	CC493	Positive	ANLN	GO_INTRAMOLECULAR_OXIDOREDUCTASE_ACTIVITY	0.249844	3.29e-07	MF423	Positive
ANLN	GO_STEREOCILIUM_BUNDLE	-0.17278	0.000462903	CC571	Negative	ANLN	GO_SUMO_TRANSFERASE_ACTIVITY	0.249409	3.45e-07	MF921	Positive
ANLN	GO_GOLGI_LUMEN	0.0221352	0.656144	CC243	Positive	ANLN	GO_MHC_PROTEIN_BINDING	0.248821	3.69e-07	MF510	Positive
ANLN	GO_EARLY_PHAGOSOME	0.0879836	0.0762314	CC175	Positive	ANLN	GO_PHOSPHOLIPASE_A2_ACTIVITY	-0.248167	3.96e-07	MF699	Negative
ANLN	GO_FILOPODIUM_TIP	0.263406	6.92e-08	CC226	Positive	ANLN	GO_GLUCOSE_BINDING	0.247593	4.22e-07	MF337	Positive
ANLN	GO_NUCLEAR_TRANSCRIPTION_FACTOR_COMPLEX	0.441953	<2E-16	CC402	Positive	ANLN	GO_OXIDOREDUCTASE_ACTIVITY_ACTING_ON_THE_CH_CH_GROUP_OF_DONORS	-0.247409	4.31e-07	MF633	Negative
ANLN	GO_INTRINSIC_COMPONENT_OF_POSTSYNAPTIC_MEMBRANE	0.00899549	0.856428	CC289	Positive	ANLN	GO_PHOSPHOLIPID_BINDING	0.246618	4.7e-07	MF705	Positive
ANLN	GO_ENDOCYTIC_PATCH	0.312793	1.09e-10	CC176	Positive	ANLN	GO_PHOSPHATE_ION_BINDING	0.246135	4.96e-07	MF671	Positive
ANLN	GO_SNARE_COMPLEX	0.248232	3.93e-07	CC553	Positive	ANLN	GO_PHOSPHORIC_ESTER_HYDROLASE_ACTIVITY	0.24495	5.65e-07	MF711	Positive
ANLN	GO_VOLTAGE_GATED_SODIUM_CHANNEL_COMPLEX	-0.164716	0.000851117	CC629	Negative	ANLN	GO_CGMP_BINDING	-0.243679	6.49e-07	MF166	Negative
ANLN	GO_ACTIN_BASED_CELL_PROJECTION	0.199511	5.05e-05	CC8	Positive	ANLN	GO_SCAFFOLD_PROTEIN_BINDING	0.242925	7.04e-07	MF850	Positive
ANLN	GO_FASCIA_ADHERENS	0.287812	3.34e-09	CC218	Positive	ANLN	GO_METALLOENDOPEPTIDASE_ACTIVITY	0.242657	7.25e-07	MF502	Positive
ANLN	GO_9PLUS0_NON_MOTILE_CILIUM	0.178513	0.000295295	CC2	Positive	ANLN	GO_INTERMEDIATE_FILAMENT_BINDING	0.242547	7.33e-07	MF419	Positive
ANLN	GO_SITE_OF_POLARIZED_GROWTH	0.322803	2.53e-11	CC544	Positive	ANLN	GO_THIOLESTER_HYDROLASE_ACTIVITY	-0.242277	7.55e-07	MF937	Negative
ANLN	GO_A_BAND	-0.00149054	0.976085	CC4	Negative	ANLN	GO_GLUTAMATE_RECEPTOR_BINDING	0.2422	7.61e-07	MF343	Positive
ANLN	GO_POSTSYNAPTIC_DENSITY_INTRACELLULAR_COMPONENT	0.0771698	0.120095	CC457	Positive	ANLN	GO_GTP_RHO_BINDING	0.241465	8.24e-07	MF353	Positive
ANLN	GO_U4_SNRNP	-0.0606561	0.222066	CC618	Negative	ANLN	GO_PEROXISOME_PROLIFERATOR_ACTIVATED_RECEPTOR_BINDING	0.241172	8.51e-07	MF665	Positive
ANLN	GO_CELL_TRAILING_EDGE	0.000252098	0.995955	CC78	Positive	ANLN	GO_ENDOPEPTIDASE_ACTIVITY	0.240781	8.87e-07	MF273	Positive
ANLN	GO_MICROTUBULE_PLUS_END	0.655407	<2E-16	CC340	Positive	ANLN	GO_CYCLIN_BINDING	0.239896	9.75e-07	MF203	Positive
ANLN	GO_PHAGOCYTIC_VESICLE_MEMBRANE	0.290454	2.36e-09	CC429	Positive	ANLN	GO_ANDROGEN_RECEPTOR_BINDING	0.239398	1.03e-06	MF66	Positive
ANLN	GO_ACTOMYOSIN	0.14041	0.00453922	CC12	Positive	ANLN	GO_RRNA_BINDING	-0.238564	1.12e-06	MF846	Negative
ANLN	GO_FILAMENTOUS_ACTIN	0.178443	0.000296939	CC223	Positive	ANLN	GO_LIPOPOLYSACCHARIDE_BINDING	0.236417	1.41e-06	MF466	Positive
ANLN	GO_CYTOSOLIC_LARGE_RIBOSOMAL_SUBUNIT	-0.38877	4.44e-16	CC153	Negative	ANLN	GO_ACTIN_BINDING	0.235126	1.62e-06	MF24	Positive
ANLN	GO_AXON_CYTOPLASM	0.230608	2.58e-06	CC37	Positive	ANLN	GO_RNA_POLYMERASE_BINDING	0.235041	1.63e-06	MF830	Positive
ANLN	GO_DNA_HELICASE_COMPLEX	0.0463811	0.35065	CC166	Positive	ANLN	GO_G_PROTEIN_BETA_GAMMA_SUBUNIT_COMPLEX_BINDING	0.232713	2.08e-06	MF316	Positive
ANLN	GO_ENDOPLASMIC_RETICULUM_SUBCOMPARTMENT	0.159588	0.0012362	CC190	Positive	ANLN	GO_ENZYME_INHIBITOR_ACTIVITY	0.232265	2.18e-06	MF277	Positive
ANLN	GO_LEADING_EDGE_MEMBRANE	0.159703	0.00122606	CC311	Positive	ANLN	GO_METAL_CLUSTER_BINDING	0.231181	2.43e-06	MF497	Positive
ANLN	GO_FILOPODIUM	0.325746	1.63e-11	CC224	Positive	ANLN	GO_TRNA_BINDING	0.23106	2.46e-06	MF980	Positive
ANLN	GO_METHYLTRANSFERASE_COMPLEX	0.35496	1.57e-13	CC329	Positive	ANLN	GO_POLY_PYRIMIDINE_TRACT_BINDING	0.230836	2.52e-06	MF722	Positive
ANLN	GO_CATENIN_COMPLEX	0.190766	0.000107791	CC63	Positive	ANLN	GO_NUCLEOSIDE_TRIPHOSPHATASE_REGULATOR_ACTIVITY	0.230602	2.58e-06	MF587	Positive
ANLN	GO_TERMINAL_BOUTON	0.138657	0.00507499	CC584	Positive	ANLN	GO_RAL_GTPASE_BINDING	0.229995	2.75e-06	MF800	Positive
ANLN	GO_POSTSYNAPTIC_ENDOCYTIC_ZONE	0.0947502	0.0561419	CC459	Positive	ANLN	GO_HISTONE_LYSINE_N_METHYLTRANSFERASE_ACTIVITY	0.229501	2.89e-06	MF379	Positive
ANLN	GO_GUANYL_NUCLEOTIDE_EXCHANGE_FACTOR_COMPLEX	0.293343	1.61e-09	CC246	Positive	ANLN	GO_DISULFIDE_OXIDOREDUCTASE_ACTIVITY	0.228273	3.28e-06	MF238	Positive
ANLN	GO_INTRINSIC_COMPONENT_OF_PRESYNAPTIC_MEMBRANE	0.0212273	0.669398	CC292	Positive	ANLN	GO_HISTONE_ACETYLTRANSFERASE_BINDING	0.228207	3.3e-06	MF372	Positive
ANLN	GO_PRC1_COMPLEX	-0.0932995	0.0600317	CC465	Negative	ANLN	GO_UBIQUITIN_SPECIFIC_PROTEASE_BINDING	0.227524	3.54e-06	MF1000	Positive
ANLN	GO_SCF_UBIQUITIN_LIGASE_COMPLEX	0.182815	0.000208815	CC530	Positive	ANLN	GO_GLUCOCORTICOID_RECEPTOR_BINDING	0.22718	3.66e-06	MF336	Positive
ANLN	GO_LAMELLAR_BODY	0.166625	0.000738646	CC302	Positive	ANLN	GO_GALACTOSYLTRANSFERASE_ACTIVITY	0.226853	3.78e-06	MF327	Positive
ANLN	GO_H4_HISTONE_ACETYLTRANSFERASE_COMPLEX	0.307269	2.39e-10	CC248	Positive	ANLN	GO_PHOSPHATASE_ACTIVATOR_ACTIVITY	0.226648	3.86e-06	MF666	Positive
ANLN	GO_CYTOSOLIC_SMALL_RIBOSOMAL_SUBUNIT	-0.367459	1.87e-14	CC155	Negative	ANLN	GO_ACTIN_FILAMENT_BINDING	0.225351	4.4e-06	MF26	Positive
ANLN	GO_MANCHETTE	0.0301531	0.544128	CC320	Positive	ANLN	GO_CHEMOREPELLENT_ACTIVITY	-0.224911	4.6e-06	MF174	Negative
ANLN	GO_NODE_OF_RANVIER	0.132986	0.00721883	CC381	Positive	ANLN	GO_PROTEIN_PHOSPHATASE_1_BINDING	0.224712	4.69e-06	MF763	Positive
ANLN	GO_ENDOPLASMIC_RETICULUM_CHAPERONE_COMPLEX	0.341565	1.4e-12	CC184	Positive	ANLN	GO_GTPASE_INHIBITOR_ACTIVITY	0.224715	4.69e-06	MF356	Positive
ANLN	GO_TRANSPORT_VESICLE_MEMBRANE	0.157232	0.00146216	CC608	Positive	ANLN	GO_ENDODEOXYRIBONUCLEASE_ACTIVITY	0.224182	4.95e-06	MF267	Positive
ANLN	GO_REPLISOME	0.622286	<2E-16	CC501	Positive	ANLN	GO_COMPLEMENT_BINDING	0.223681	5.2e-06	MF191	Positive
ANLN	GO_ATPASE_COMPLEX	0.212197	1.58e-05	CC32	Positive	ANLN	GO_VOLTAGE_GATED_CHLORIDE_CHANNEL_ACTIVITY	0.221764	6.29e-06	MF1015	Positive
ANLN	GO_MAST_CELL_GRANULE	0.20451	3.22e-05	CC321	Positive	ANLN	GO_CYSTEINE_TYPE_ENDOPEPTIDASE_INHIBITOR_ACTIVITY_INVOLVED_IN_APOPTOTIC_PROCESS	0.221195	6.65e-06	MF213	Positive
ANLN	GO_AMPA_GLUTAMATE_RECEPTOR_COMPLEX	-0.0703198	0.156764	CC16	Negative	ANLN	GO_CALCIUM_DEPENDENT_PROTEIN_KINASE_ACTIVITY	0.220061	7.43e-06	MF125	Positive
ANLN	GO_AZUROPHIL_GRANULE	0.260746	9.46e-08	CC41	Positive	ANLN	GO_TOXIC_SUBSTANCE_BINDING	-0.219032	8.22e-06	MF942	Negative
ANLN	GO_MLL3_4_COMPLEX	0.296217	1.1e-09	CC356	Positive	ANLN	GO_NEUROPEPTIDE_HORMONE_ACTIVITY	-0.21902	8.23e-06	MF560	Negative
ANLN	GO_NUCLEAR_TRANSCRIPTIONAL_REPRESSOR_COMPLEX	0.275131	1.67e-08	CC403	Positive	ANLN	GO_DIPEPTIDASE_ACTIVITY	-0.218235	8.88e-06	MF235	Negative
ANLN	GO_ESCRT_III_COMPLEX	-0.289968	2.52e-09	CC200	Negative	ANLN	GO_AMIDE_TRANSMEMBRANE_TRANSPORTER_ACTIVITY	0.217748	9.31e-06	MF55	Positive
ANLN	GO_CILIARY_BASE	0.255209	1.79e-07	CC92	Positive	ANLN	GO_O_METHYLTRANSFERASE_ACTIVITY	-0.215045	1.21e-05	MF598	Negative
ANLN	GO_PLATELET_ALPHA_GRANULE_LUMEN	0.106203	0.032191	CC444	Positive	ANLN	GO_NEUREXIN_FAMILY_PROTEIN_BINDING	-0.214992	1.21e-05	MF558	Negative
ANLN	GO_IMMUNOLOGICAL_SYNAPSE	0.205223	3.02e-05	CC264	Positive	ANLN	GO_OLIGOPEPTIDE_BINDING	-0.214531	1.27e-05	MF601	Negative
ANLN	GO_INTRINSIC_COMPONENT_OF_PRESYNAPTIC_ACTIVE_ZONE_MEMBRANE	0.0529442	0.286617	CC291	Positive	ANLN	GO_POTASSIUM_CHANNEL_REGULATOR_ACTIVITY	0.213293	1.43e-05	MF728	Positive
ANLN	GO_PROTEASOME_CORE_COMPLEX_BETA_SUBUNIT_COMPLEX	0.24009	9.55e-07	CC480	Positive	ANLN	GO_DIOXYGENASE_ACTIVITY	0.212391	1.55e-05	MF234	Positive
ANLN	GO_SECRETORY_GRANULE_MEMBRANE	0.226149	4.06e-06	CC534	Positive	ANLN	GO_ADENOSINE_DEAMINASE_ACTIVITY	0.211739	1.65e-05	MF36	Positive
ANLN	GO_MICROTUBULE	0.711126	<2E-16	CC336	Positive	ANLN	GO_MIRNA_BINDING	0.21158	1.68e-05	MF517	Positive
ANLN	GO_PRONUCLEUS	0.689224	<2E-16	CC477	Positive	ANLN	GO_DEMETHYLASE_ACTIVITY	0.211523	1.69e-05	MF229	Positive
ANLN	GO_GLIAL_CELL_PROJECTION	0.3474	5.48e-13	CC235	Positive	ANLN	GO_CALCIUM_ACTIVATED_CATION_CHANNEL_ACTIVITY	-0.210468	1.86e-05	MF116	Negative
ANLN	GO_KINETOCHORE	0.760438	<2E-16	CC300	Positive	ANLN	GO_POLY_A_BINDING	0.210442	1.86e-05	MF719	Positive
ANLN	GO_ORGANELLE_ENVELOPE_LUMEN	0.125131	0.0115175	CC410	Positive	ANLN	GO_UBIQUITIN_LIKE_PROTEIN_CONJUGATING_ENZYME_BINDING	0.210402	1.87e-05	MF994	Positive
ANLN	GO_INTERCELLULAR_BRIDGE	0.456876	<2E-16	CC274	Positive	ANLN	GO_PEPTIDASE_REGULATOR_ACTIVITY	0.209635	2.01e-05	MF652	Positive
ANLN	GO_MYOFILAMENT	0.118026	0.0172146	CC365	Positive	ANLN	GO_PHOSPHATIDYLINOSITOL_3_KINASE_BINDING	0.207895	2.36e-05	MF681	Positive
ANLN	GO_RIBOSOME	-0.250138	3.18e-07	CC511	Negative	ANLN	GO_ANION_CHANNEL_ACTIVITY	0.207816	2.38e-05	MF68	Positive
ANLN	GO_EXTRINSIC_COMPONENT_OF_CYTOPLASMIC_SIDE_OF_PLASMA_MEMBRANE	0.256638	1.52e-07	CC211	Positive	ANLN	GO_HISTONE_DEMETHYLASE_ACTIVITY	0.207571	2.43e-05	MF376	Positive
ANLN	GO_MRNA_CLEAVAGE_AND_POLYADENYLATION_SPECIFICITY_FACTOR_COMPLEX	0.46041	<2E-16	CC358	Positive	ANLN	GO_TRANSFERASE_ACTIVITY_TRANSFERRING_SULFUR_CONTAINING_GROUPS	-0.204436	3.24e-05	MF956	Negative
ANLN	GO_NUCLEAR_INCLUSION_BODY	0.40148	<2E-16	CC390	Positive	ANLN	GO_MHC_PROTEIN_COMPLEX_BINDING	0.203909	3.4e-05	MF511	Positive
ANLN	GO_COPII_COATED_ER_TO_GOLGI_TRANSPORT_VESICLE	0.404729	<2E-16	CC132	Positive	ANLN	GO_SMAD_BINDING	0.203507	3.53e-05	MF871	Positive
ANLN	GO_PROTEIN_PHOSPHATASE_TYPE_1_COMPLEX	0.234166	1.79e-06	CC487	Positive	ANLN	GO_TRANSFERASE_ACTIVITY_TRANSFERRING_ACYL_GROUPS	0.203057	3.68e-05	MF948	Positive
ANLN	GO_BASAL_PART_OF_CELL	0.0912797	0.0658157	CC44	Positive	ANLN	GO_BASAL_TRANSCRIPTION_MACHINERY_BINDING	0.202709	3.79e-05	MF96	Positive
ANLN	GO_PRERIBOSOME_LARGE_SUBUNIT_PRECURSOR	0.202246	3.95e-05	CC468	Positive	ANLN	GO_OXIDOREDUCTASE_ACTIVITY_OXIDIZING_METAL_IONS	0.20243	3.89e-05	MF639	Positive
ANLN	GO_MAIN_AXON	0.112911	0.0227164	CC318	Positive	ANLN	GO_CHEMOKINE_RECEPTOR_BINDING	0.201871	4.09e-05	MF173	Positive
ANLN	GO_PEPTIDASE_COMPLEX	0.523599	<2E-16	CC422	Positive	ANLN	GO_CYCLIC_NUCLEOTIDE_GATED_ION_CHANNEL_ACTIVITY	-0.201644	4.17e-05	MF201	Negative
ANLN	GO_VESICLE_COAT	0.385664	6.66e-16	CC625	Positive	ANLN	GO_ANION_CATION_SYMPORTER_ACTIVITY	0.200588	4.59e-05	MF67	Positive
ANLN	GO_INTRINSIC_COMPONENT_OF_POSTSYNAPTIC_SPECIALIZATION_MEMBRANE	-0.046127	0.353299	CC290	Negative	ANLN	GO_DOPAMINE_BINDING	-0.200246	4.73e-05	MF253	Negative
ANLN	GO_GOLGI_STACK	0.112015	0.0238224	CC244	Positive	ANLN	GO_VOLTAGE_GATED_SODIUM_CHANNEL_ACTIVITY	-0.198662	5.44e-05	MF1020	Negative
ANLN	GO_MALE_GERM_CELL_NUCLEUS	0.528053	<2E-16	CC319	Positive	ANLN	GO_STEROID_DEHYDROGENASE_ACTIVITY	-0.197999	5.77e-05	MF896	Negative
ANLN	GO_INTRINSIC_COMPONENT_OF_PEROXISOMAL_MEMBRANE	-0.195873	6.95e-05	CC287	Negative	ANLN	GO_PHOSPHATIDYLSERINE_BINDING	0.197803	5.87e-05	MF698	Positive
ANLN	GO_SERINE_THREONINE_PROTEIN_KINASE_COMPLEX	0.677281	<2E-16	CC537	Positive	ANLN	GO_DIACYLGLYCEROL_KINASE_ACTIVITY	-0.196968	6.31e-05	MF232	Negative
ANLN	GO_U2_TYPE_CATALYTIC_STEP_2_SPLICEOSOME	0.277157	1.3e-08	CC616	Positive	ANLN	GO_L_ASCORBIC_ACID_BINDING	0.196772	6.42e-05	MF445	Positive
ANLN	GO_SM_LIKE_PROTEIN_FAMILY_COMPLEX	0.173979	0.00042185	CC545	Positive	ANLN	GO_ION_CHANNEL_BINDING	0.196566	6.54e-05	MF429	Positive
ANLN	GO_SPERM_HEAD	0.0588091	0.236491	CC560	Positive	ANLN	GO_PROTEIN_TYROSINE_KINASE_BINDING	0.196029	6.85e-05	MF777	Positive
ANLN	GO_G_PROTEIN_BETA_GAMMA_SUBUNIT_COMPLEX	0.200965	4.43e-05	CC228	Positive	ANLN	GO_ALPHA_TUBULIN_BINDING	0.195978	6.89e-05	MF53	Positive
ANLN	GO_COPI_COATED_VESICLE_MEMBRANE	0.334945	3.98e-12	CC130	Positive	ANLN	GO_NUCLEOSIDE_DIPHOSPHATASE_ACTIVITY	-0.195959	6.9e-05	MF584	Negative
ANLN	GO_OLIGOSACCHARYLTRANSFERASE_COMPLEX	0.185962	0.000161252	CC408	Positive	ANLN	GO_TRANSFORMING_GROWTH_FACTOR_BETA_RECEPTOR_BINDING	-0.194966	7.52e-05	MF959	Negative
ANLN	GO_SPERM_MIDPIECE	-0.257252	1.42e-07	CC561	Negative	ANLN	GO_H4_HISTONE_ACETYLTRANSFERASE_ACTIVITY	0.194587	7.77e-05	MF360	Positive
ANLN	GO_HEMOGLOBIN_COMPLEX	-0.17119	0.000523109	CC250	Negative	ANLN	GO_MYOSIN_HEAVY_CHAIN_BINDING	-0.193948	8.21e-05	MF541	Negative
ANLN	GO_SPECIFIC_GRANULE_MEMBRANE	0.151442	0.00218747	CC559	Positive	ANLN	GO_ISOPRENOID_BINDING	-0.19375	8.35e-05	MF438	Negative
ANLN	GO_SET1C_COMPASS_COMPLEX	0.14519	0.00332841	CC538	Positive	ANLN	GO_GLUCURONOSYLTRANSFERASE_ACTIVITY	-0.193361	8.64e-05	MF340	Negative
ANLN	GO_RECYCLING_ENDOSOME_MEMBRANE	0.00646117	0.896606	CC498	Positive	ANLN	GO_TRANSCRIPTION_COREPRESSOR_ACTIVITY	0.191648	0.000100006	MF946	Positive
ANLN	GO_INNER_MITOCHONDRIAL_MEMBRANE_PROTEIN_COMPLEX	-0.341596	1.4e-12	CC268	Negative	ANLN	GO_PHOSPHATIDYLINOSITOL_PHOSPHATE_BINDING	0.191477	0.000101468	MF695	Positive
ANLN	GO_BETA_CATENIN_DESTRUCTION_COMPLEX	0.406174	<2E-16	CC48	Positive	ANLN	GO_ACETYLGALACTOSAMINYLTRANSFERASE_ACTIVITY	0.191146	0.000104368	MF19	Positive
ANLN	GO_AZUROPHIL_GRANULE_MEMBRANE	0.189494	0.00012004	CC43	Positive	ANLN	GO_OMEGA_PEPTIDASE_ACTIVITY	-0.19047	0.000110532	MF604	Negative
ANLN	GO_OUTER_MEMBRANE	0.204612	3.19e-05	CC414	Positive	ANLN	GO_ALDO_KETO_REDUCTASE_NADP_ACTIVITY	-0.190099	0.000114065	MF49	Negative
ANLN	GO_EARLY_ENDOSOME	0.311793	1.26e-10	CC173	Positive	ANLN	GO_CATION_CATION_ANTIPORTER_ACTIVITY	0.189189	0.000123166	MF159	Positive
ANLN	GO_HOST_CELLULAR_COMPONENT	0.709065	<2E-16	CC260	Positive	ANLN	GO_PROTEIN_LIPID_COMPLEX_BINDING	0.188825	0.000126992	MF759	Positive
ANLN	GO_MISMATCH_REPAIR_COMPLEX	0.386098	6.66e-16	CC344	Positive	ANLN	GO_LYSINE_ACETYLATED_HISTONE_BINDING	0.188518	0.000130317	MF479	Positive
ANLN	GO_CHYLOMICRON	-0.063887	0.198365	CC90	Negative	ANLN	GO_HYALURONIC_ACID_BINDING	0.187364	0.000143514	MF389	Positive
ANLN	GO_FIBRILLAR_COLLAGEN_TRIMER	0.203906	3.4e-05	CC220	Positive	ANLN	GO_FIBRONECTIN_BINDING	0.186848	0.000149824	MF307	Positive
ANLN	GO_INTRINSIC_COMPONENT_OF_ORGANELLE_MEMBRANE	0.187123	0.000146436	CC286	Positive	ANLN	GO_TRANSFERASE_ACTIVITY_TRANSFERRING_GLYCOSYL_GROUPS	0.186541	0.000153689	MF951	Positive
ANLN	GO_PHAGOCYTIC_CUP	0.120323	0.0151495	CC427	Positive	ANLN	GO_METALLOPEPTIDASE_ACTIVITY	0.18607	0.000159811	MF505	Positive
ANLN	GO_PRESYNAPSE	0.154737	0.00174222	CC471	Positive	ANLN	GO_BICARBONATE_TRANSMEMBRANE_TRANSPORTER_ACTIVITY	-0.185869	0.000162494	MF103	Negative
ANLN	GO_U2_SNRNP	0.18953	0.000119677	CC615	Positive	ANLN	GO_RIBOSOMAL_SMALL_SUBUNIT_BINDING	0.185706	0.000164702	MF822	Positive
ANLN	GO_MITOTIC_SPINDLE_MIDZONE	0.646704	<2E-16	CC352	Positive	ANLN	GO_PROTEIN_DEACETYLASE_ACTIVITY	-0.184481	0.0001822	MF747	Negative
ANLN	GO_GOLGI_ASSOCIATED_VESICLE_MEMBRANE	0.36465	3.02e-14	CC239	Positive	ANLN	GO_LOW_DENSITY_LIPOPROTEIN_PARTICLE_BINDING	0.18341	0.000198924	MF472	Positive
ANLN	GO_ENDOSOME_MEMBRANE	0.170758	0.000540645	CC194	Positive	ANLN	GO_TRANSFERASE_ACTIVITY_TRANSFERRING_AMINO_ACYL_GROUPS	-0.183226	0.000201926	MF950	Negative
ANLN	GO_COHESIN_COMPLEX	0.628518	<2E-16	CC114	Positive	ANLN	GO_3_5_CYCLIC_GMP_PHOSPHODIESTERASE_ACTIVITY	-0.182311	0.000217549	MF8	Negative
ANLN	GO_NMDA_SELECTIVE_GLUTAMATE_RECEPTOR_COMPLEX	0.0670563	0.176962	CC380	Positive	ANLN	GO_SECONDARY_ACTIVE_TRANSMEMBRANE_TRANSPORTER_ACTIVITY	0.182038	0.000222432	MF853	Positive
ANLN	GO_ATPASE_DEPENDENT_TRANSMEMBRANE_TRANSPORT_COMPLEX	-0.292677	1.76e-09	CC33	Negative	ANLN	GO_S100_PROTEIN_BINDING	0.181522	0.000231933	MF849	Positive
ANLN	GO_ENDOLYSOSOME_MEMBRANE	0.398742	<2E-16	CC181	Positive	ANLN	GO_MITOGEN_ACTIVATED_PROTEIN_KINASE_BINDING	0.18005	0.000261137	MF521	Positive
ANLN	GO_APICAL_PLASMA_MEMBRANE	0.0873828	0.0782673	CC27	Positive	ANLN	GO_NUCLEOBASE_CONTAINING_COMPOUND_TRANSMEMBRANE_TRANSPORTER_ACTIVITY	0.17913	0.000281102	MF582	Positive
ANLN	GO_T_TUBULE	0.0187677	0.705808	CC581	Positive	ANLN	GO_OXIDOREDUCTASE_ACTIVITY_ACTING_ON_A_SULFUR_GROUP_OF_DONORS	0.176865	0.000336501	MF617	Positive
ANLN	GO_BLOOD_MICROPARTICLE	0.0603499	0.224413	CC52	Positive	ANLN	GO_OXIDOREDUCTASE_ACTIVITY_ACTING_ON_CH_OH_GROUP_OF_DONORS	-0.176511	0.000346035	MF619	Negative
ANLN	GO_PHAGOCYTIC_VESICLE	0.241132	8.54e-07	CC428	Positive	ANLN	GO_HSP90_PROTEIN_BINDING	0.175739	0.00036768	MF388	Positive
ANLN	GO_MITOCHONDRIAL_MATRIX	-0.123818	0.0124238	CC347	Negative	ANLN	GO_PROTEIN_KINASE_C_ACTIVITY	0.175682	0.000369331	MF757	Positive
ANLN	GO_NEURON_SPINE	0.262318	7.87e-08	CC377	Positive	ANLN	GO_NEUROTRANSMITTER_SODIUM_SYMPORTER_ACTIVITY	0.17522	0.000382944	MF567	Positive
ANLN	GO_NEURON_PROJECTION_TERMINUS	0.170505	0.000551183	CC376	Positive	ANLN	GO_INTEGRIN_BINDING	0.174288	0.000411831	MF417	Positive
ANLN	GO_STAGA_COMPLEX	-0.136897	0.00566912	CC570	Negative	ANLN	GO_CHEMOKINE_ACTIVITY	0.174209	0.000414353	MF171	Positive
ANLN	GO_PHAGOPHORE_ASSEMBLY_SITE	0.199761	4.94e-05	CC430	Positive	ANLN	GO_MODIFIED_AMINO_ACID_TRANSMEMBRANE_TRANSPORTER_ACTIVITY	0.174049	0.00041956	MF526	Positive
ANLN	GO_TETRASPANIN_ENRICHED_MICRODOMAIN	-0.173047	0.000453435	CC588	Negative	ANLN	GO_PROTEOGLYCAN_BINDING	0.173815	0.000427264	MF780	Positive
ANLN	GO_ZYMOGEN_GRANULE	0.163522	0.000929294	CC632	Positive	ANLN	GO_TRANSFERASE_ACTIVITY_TRANSFERRING_NITROGENOUS_GROUPS	-0.173151	0.000449831	MF953	Negative
ANLN	GO_ANAPHASE_PROMOTING_COMPLEX	0.332765	5.58e-12	CC17	Positive	ANLN	GO_MRNA_BINDING	0.171769	0.000500365	MF537	Positive
ANLN	GO_KERATIN_FILAMENT	0.0741441	0.13537	CC298	Positive	ANLN	GO_SODIUM_INDEPENDENT_ORGANIC_ANION_TRANSMEMBRANE_TRANSPORTER_ACTIVITY	0.170909	0.000534442	MF881	Positive
ANLN	GO_SITE_OF_DNA_DAMAGE	0.687109	<2E-16	CC542	Positive	ANLN	GO_I_SMAD_BINDING	0.17071	0.000542635	MF401	Positive
ANLN	GO_ROUGH_ENDOPLASMIC_RETICULUM_MEMBRANE	0.0148608	0.765016	CC522	Positive	ANLN	GO_GLUCOSYLTRANSFERASE_ACTIVITY	0.170416	0.000554963	MF339	Positive
ANLN	GO_INTRINSIC_COMPONENT_OF_EXTERNAL_SIDE_OF_PLASMA_MEMBRANE	0.115988	0.0192484	CC280	Positive	ANLN	GO_ORGANIC_CATION_TRANSMEMBRANE_TRANSPORTER_ACTIVITY	-0.1692	0.000608649	MF610	Negative
ANLN	GO_UNCONVENTIONAL_MYOSIN_COMPLEX	0.145402	0.00328217	CC621	Positive	ANLN	GO_LIPASE_ACTIVATOR_ACTIVITY	0.168807	0.000627021	MF460	Positive
ANLN	GO_CILIARY_TIP	0.039861	0.422547	CC96	Positive	ANLN	GO_LIPASE_ACTIVITY	-0.168727	0.000630809	MF461	Negative
ANLN	GO_TERTIARY_GRANULE_MEMBRANE	0.219135	8.13e-06	CC587	Positive	ANLN	GO_RAB_GTPASE_BINDING	0.167746	0.0006792	MF793	Positive
ANLN	GO_LAMELLIPODIUM_MEMBRANE	0.362199	4.62e-14	CC304	Positive	ANLN	GO_TRANSFERASE_ACTIVITY_TRANSFERRING_HEXOSYL_GROUPS	0.166836	0.000727094	MF952	Positive
ANLN	GO_INTERCALATED_DISC	0.253301	2.23e-07	CC273	Positive	ANLN	GO_TROPOMYOSIN_BINDING	0.165787	0.000786228	MF984	Positive
ANLN	GO_MEDIATOR_COMPLEX	0.339534	1.94e-12	CC323	Positive	ANLN	GO_ION_TRANSMEMBRANE_TRANSPORTER_ACTIVITY_PHOSPHORYLATIVE_MECHANISM	0.165148	0.000824376	MF432	Positive
ANLN	GO_AXOLEMMA	0.155175	0.00168979	CC36	Positive	ANLN	GO_LONG_CHAIN_FATTY_ACID_COA_LIGASE_ACTIVITY	-0.165148	0.000824383	MF470	Negative
ANLN	GO_EXTRINSIC_COMPONENT_OF_MEMBRANE	0.289937	2.53e-09	CC213	Positive	ANLN	GO_MANGANESE_ION_BINDING	0.165009	0.000832863	MF487	Positive
ANLN	GO_INTRINSIC_COMPONENT_OF_MITOCHONDRIAL_MEMBRANE	0.0189697	0.702791	CC283	Positive	ANLN	GO_ALPHA_ACTININ_BINDING	-0.164208	0.000883606	MF51	Negative
ANLN	GO_RECEPTOR_COMPLEX	0.123709	0.0125014	CC496	Positive	ANLN	GO_AU_RICH_ELEMENT_BINDING	0.164154	0.00088714	MF95	Positive
ANLN	GO_LUMENAL_SIDE_OF_MEMBRANE	0.0843977	0.0890449	CC315	Positive	ANLN	GO_RECEPTOR_SIGNALING_COMPLEX_ADAPTOR_ACTIVITY	0.164141	0.000887975	MF806	Positive
ANLN	GO_POLE_PLASM	0.245673	5.22e-07	CC451	Positive	ANLN	GO_ACTININ_BINDING	-0.163169	0.000953661	MF28	Negative
ANLN	GO_PHAGOPHORE_ASSEMBLY_SITE_MEMBRANE	0.213201	1.44e-05	CC431	Positive	ANLN	GO_RNA_POLYMERASE_CORE_ENZYME_BINDING	0.162879	0.00097412	MF831	Positive
ANLN	GO_RNA_POLYMERASE_III_COMPLEX	-0.0210537	0.671943	CC518	Negative	ANLN	GO_IGG_BINDING	0.16217	0.00102581	MF403	Positive
ANLN	GO_CHROMOCENTER	0.673582	<2E-16	CC86	Positive	ANLN	GO_RETINOIC_ACID_BINDING	-0.162141	0.00102794	MF811	Negative
ANLN	GO_BRUSH_BORDER	0.349789	3.71e-13	CC54	Positive	ANLN	GO_TRIGLYCERIDE_LIPASE_ACTIVITY	-0.161479	0.00107862	MF979	Negative
ANLN	GO_SPINDLE	0.792691	<2E-16	CC563	Positive	ANLN	GO_C2H2_ZINC_FINGER_DOMAIN_BINDING	0.158918	0.00129697	MF112	Positive
ANLN	GO_CELL_PROJECTION_MEMBRANE	0.19219	9.55e-05	CC76	Positive	ANLN	GO_MHC_CLASS_II_PROTEIN_COMPLEX_BINDING	0.158704	0.00131694	MF509	Positive
ANLN	GO_ASTROCYTE_PROJECTION	0.431134	<2E-16	CC31	Positive	ANLN	GO_AMINO_ACID_BINDING	0.158611	0.00132569	MF57	Positive
ANLN	GO_INTRINSIC_COMPONENT_OF_POSTSYNAPTIC_DENSITY_MEMBRANE	-0.0749182	0.131327	CC288	Negative	ANLN	GO_NF_KAPPAB_BINDING	0.157773	0.00140719	MF570	Positive
ANLN	GO_ENDOLYSOSOME	0.312321	1.17e-10	CC180	Positive	ANLN	GO_FAD_BINDING	0.15618	0.0015748	MF297	Positive
ANLN	GO_INTRINSIC_COMPONENT_OF_SYNAPTIC_VESICLE_MEMBRANE	-0.204955	3.09e-05	CC294	Negative	ANLN	GO_INTRACELLULAR_CALCIUM_ACTIVATED_CHLORIDE_CHANNEL_ACTIVITY	-0.155619	0.001638	MF420	Negative
ANLN	GO_HETEROCHROMATIN	0.633354	<2E-16	CC251	Positive	ANLN	GO_PROTEIN_TYROSINE_KINASE_ACTIVITY	0.155038	0.00170598	MF776	Positive
ANLN	GO_RETROMER_COMPLEX	0.350281	3.42e-13	CC506	Positive	ANLN	GO_COLLAGEN_BINDING	0.154938	0.00171798	MF190	Positive
ANLN	GO_NADH_DEHYDROGENASE_COMPLEX	-0.433524	<2E-16	CC370	Negative	ANLN	GO_CYCLIC_NUCLEOTIDE_PHOSPHODIESTERASE_ACTIVITY	-0.154868	0.00172634	MF202	Negative
ANLN	GO_CONDENSED_CHROMOSOME_OUTER_KINETOCHORE	0.764839	<2E-16	CC121	Positive	ANLN	GO_ATPASE_ACTIVATOR_ACTIVITY	0.15421	0.00180735	MF87	Positive
ANLN	GO_CATION_TRANSPORTING_ATPASE_COMPLEX	-0.195354	7.27e-05	CC65	Negative	ANLN	GO_GLYCOLIPID_BINDING	0.153998	0.0018342	MF347	Positive
ANLN	GO_DENDRITE_CYTOPLASM	0.170767	0.000540265	CC156	Positive	ANLN	GO_LRR_DOMAIN_BINDING	0.153102	0.00195158	MF475	Positive
ANLN	GO_90S_PRERIBOSOME	0.23489	1.66e-06	CC1	Positive	ANLN	GO_SH2_DOMAIN_BINDING	0.152783	0.00199502	MF860	Positive
ANLN	GO_INTRINSIC_COMPONENT_OF_MITOCHONDRIAL_INNER_MEMBRANE	0.0751619	0.130073	CC282	Positive	ANLN	GO_INTRAMOLECULAR_OXIDOREDUCTASE_ACTIVITY_TRANSPOSING_C_C_BONDS	-0.152266	0.00206727	MF424	Negative
ANLN	GO_PROTEIN_COMPLEX_INVOLVED_IN_CELL_ADHESION	0.241551	8.17e-07	CC483	Positive	ANLN	GO_TRANSCRIPTION_COFACTOR_BINDING	0.149682	0.00246584	MF945	Positive
ANLN	GO_TIM23_MITOCHONDRIAL_IMPORT_INNER_MEMBRANE_TRANSLOCASE_COMPLEX	-0.111717	0.0242009	CC590	Negative	ANLN	GO_OXIDOREDUCTASE_ACTIVITY_ACTING_ON_PAIRED_DONORS_WITH_INCORPORATION_OR_REDUCTION_OF_MOLECULAR_OXYGEN	-0.149181	0.00255078	MF626	Negative
ANLN	GO_NUCLEAR_PORE	0.695231	<2E-16	CC397	Positive	ANLN	GO_KINASE_INHIBITOR_ACTIVITY	0.147905	0.00277913	MF441	Positive
ANLN	GO_SIN3_COMPLEX	0.0413785	0.405088	CC540	Positive	ANLN	GO_RETINOL_DEHYDROGENASE_ACTIVITY	-0.147811	0.00279668	MF815	Negative
ANLN	GO_CYTOPLASMIC_SIDE_OF_ENDOPLASMIC_RETICULUM_MEMBRANE	-0.271029	2.77e-08	CC149	Negative	ANLN	GO_STEROL_BINDING	0.147571	0.0028419	MF900	Positive
ANLN	GO_ADHERENS_JUNCTION	0.175863	0.000364129	CC14	Positive	ANLN	GO_POLYPEPTIDE_N_ACETYLGALACTOSAMINYLTRANSFERASE_ACTIVITY	0.147024	0.00294755	MF723	Positive
ANLN	GO_STEREOCILIUM_TIP	-0.0789033	0.111971	CC572	Negative	ANLN	GO_PLATELET_DERIVED_GROWTH_FACTOR_BINDING	0.146139	0.00312605	MF717	Positive
ANLN	GO_MICROVILLUS_MEMBRANE	0.134117	0.00673574	CC342	Positive	ANLN	GO_SULFOTRANSFERASE_ACTIVITY	-0.145013	0.00336736	MF915	Negative
ANLN	GO_U12_TYPE_SPLICEOSOMAL_COMPLEX	0.0370702	0.455777	CC614	Positive	ANLN	GO_ACTIN_MONOMER_BINDING	0.144871	0.00339904	MF27	Positive
ANLN	GO_MYELIN_SHEATH	0.236045	1.47e-06	CC364	Positive	ANLN	GO_PROTEIN_METHYLTRANSFERASE_ACTIVITY	0.144563	0.00346838	MF761	Positive
ANLN	GO_POSTSYNAPTIC_SPECIALIZATION_MEMBRANE	0.00780522	0.875259	CC463	Positive	ANLN	GO_C_ACYLTRANSFERASE_ACTIVITY	-0.142948	0.00385435	MF110	Negative
ANLN	GO_CHROMATOID_BODY	0.418506	<2E-16	CC85	Positive	ANLN	GO_3_5_CYCLIC_AMP_PHOSPHODIESTERASE_ACTIVITY	-0.142542	0.00395706	MF7	Negative
ANLN	GO_PRESYNAPTIC_ACTIVE_ZONE_CYTOPLASMIC_COMPONENT	0.181356	0.000235063	CC473	Positive	ANLN	GO_CAMP_RESPONSE_ELEMENT_BINDING	0.142432	0.00398554	MF133	Positive
ANLN	GO_PRESYNAPTIC_ACTIVE_ZONE_MEMBRANE	0.138879	0.00500402	CC474	Positive	ANLN	GO_VITAMIN_BINDING	0.141911	0.004122	MF1009	Positive
ANLN	GO_POSTSYNAPTIC_CYTOSOL	0.613044	<2E-16	CC456	Positive	ANLN	GO_ACYLGLYCEROL_O_ACYLTRANSFERASE_ACTIVITY	-0.141506	0.00423115	MF35	Negative
ANLN	GO_CORTICAL_CYTOSKELETON	0.181415	0.000233939	CC136	Positive	ANLN	GO_ACTIVE_TRANSMEMBRANE_TRANSPORTER_ACTIVITY	0.141275	0.00429447	MF31	Positive
ANLN	GO_NPBAF_COMPLEX	0.0111053	0.823256	CC383	Positive	ANLN	GO_FRIZZLED_BINDING	0.139109	0.00493169	MF313	Positive
ANLN	GO_CILIARY_PLASM	0.278209	1.14e-08	CC94	Positive	ANLN	GO_ALCOHOL_BINDING	0.139051	0.00494987	MF43	Positive
ANLN	GO_PHOTORECEPTOR_INNER_SEGMENT	0.165229	0.000819433	CC436	Positive	ANLN	GO_PEPTIDE_ANTIGEN_BINDING	0.138379	0.00516495	MF654	Positive
ANLN	GO_ACROSOMAL_MEMBRANE	-0.0181732	0.714713	CC6	Negative	ANLN	GO_TUMOR_NECROSIS_FACTOR_RECEPTOR_BINDING	0.137768	0.00536747	MF986	Positive
ANLN	GO_CONDENSED_NUCLEAR_CHROMOSOME_KINETOCHORE	0.705741	<2E-16	CC124	Positive	ANLN	GO_RACEMASE_AND_EPIMERASE_ACTIVITY	0.137048	0.00561581	MF797	Positive
ANLN	GO_ENDOCYTIC_VESICLE_MEMBRANE	0.237677	1.24e-06	CC179	Positive	ANLN	GO_RAS_GUANYL_NUCLEOTIDE_EXCHANGE_FACTOR_ACTIVITY	0.137002	0.00563183	MF802	Positive
ANLN	GO_MICROBODY_MEMBRANE	-0.130572	0.0083545	CC334	Negative	ANLN	GO_CORECEPTOR_ACTIVITY	0.136942	0.00565305	MF195	Positive
ANLN	GO_EXTERNAL_SIDE_OF_PLASMA_MEMBRANE	0.0970746	0.0503466	CC210	Positive	ANLN	GO_NADP_BINDING	0.136112	0.00595369	MF551	Positive
ANLN	GO_ENDOPLASMIC_RETICULUM_QUALITY_CONTROL_COMPARTMENT	0.160301	0.00117447	CC189	Positive	ANLN	GO_BILE_ACID_TRANSMEMBRANE_TRANSPORTER_ACTIVITY	0.13578	0.00607782	MF105	Positive
ANLN	GO_AZUROPHIL_GRANULE_LUMEN	0.330278	8.18e-12	CC42	Positive	ANLN	GO_EXTRACELLULAR_MATRIX_BINDING	0.135504	0.00618294	MF292	Positive
ANLN	GO_POTASSIUM_CHANNEL_COMPLEX	-0.0118788	0.81117	CC464	Negative	ANLN	GO_SYMPORTER_ACTIVITY	0.134197	0.00670246	MF924	Positive
ANLN	GO_CORNIFIED_ENVELOPE	0.381755	1.33e-15	CC134	Positive	ANLN	GO_INORGANIC_ANION_TRANSMEMBRANE_TRANSPORTER_ACTIVITY	0.133561	0.00696941	MF409	Positive
ANLN	GO_GOLGI_CIS_CISTERNA	-0.167758	0.000678591	CC240	Negative	ANLN	GO_ANION_TRANSMEMBRANE_TRANSPORTER_ACTIVITY	0.133475	0.00700622	MF70	Positive
ANLN	GO_NUCLEAR_MATRIX	0.602842	<2E-16	CC393	Positive	ANLN	GO_HEPARAN_SULFATE_SULFOTRANSFERASE_ACTIVITY	-0.132928	0.00724436	MF365	Negative
ANLN	GO_COATED_VESICLE_MEMBRANE	0.37625	4e-15	CC113	Positive	ANLN	GO_ADRENERGIC_RECEPTOR_ACTIVITY	-0.132905	0.00725436	MF41	Negative
ANLN	GO_EUKARYOTIC_TRANSLATION_INITIATION_FACTOR_3_COMPLEX	0.0888952	0.073225	CC203	Positive	ANLN	GO_1_PHOSPHATIDYLINOSITOL_BINDING	0.132366	0.00749651	MF3	Positive
ANLN	GO_GERM_CELL_NUCLEUS	0.605842	<2E-16	CC234	Positive	ANLN	GO_CARBOHYDRATE_BINDING	0.132014	0.00765849	MF134	Positive
ANLN	GO_SPLICEOSOMAL_TRI_SNRNP_COMPLEX	0.155685	0.00163054	CC569	Positive	ANLN	GO_ORGANIC_ACID_TRANSMEMBRANE_TRANSPORTER_ACTIVITY	0.131617	0.00784454	MF608	Positive
ANLN	GO_HOST_CELL_PART	0.409832	<2E-16	CC259	Positive	ANLN	GO_ACTIVE_ION_TRANSMEMBRANE_TRANSPORTER_ACTIVITY	0.130719	0.00828125	MF30	Positive
ANLN	GO_MITOCHONDRIAL_LARGE_RIBOSOMAL_SUBUNIT	-0.0691468	0.163813	CC346	Negative	ANLN	GO_MACROMOLECULE_TRANSMEMBRANE_TRANSPORTER_ACTIVITY	0.130467	0.00840772	MF483	Positive
ANLN	GO_MITOCHONDRIAL_RESPIRATORY_CHAIN_COMPLEX_IV	-0.411826	<2E-16	CC349	Negative	ANLN	GO_HYDROLASE_ACTIVITY_ACTING_ON_CARBON_NITROGEN_BUT_NOT_PEPTIDE_BONDS_IN_CYCLIC_AMIDINES	0.129038	0.00915686	MF394	Positive
ANLN	GO_SEH1_ASSOCIATED_COMPLEX	-0.295771	1.16e-09	CC535	Negative	ANLN	GO_CHANNEL_REGULATOR_ACTIVITY	0.128977	0.00919023	MF168	Positive
ANLN	GO_SYMMETRIC_SYNAPSE	-0.190717	0.000108243	CC575	Negative	ANLN	GO_LIGAND_GATED_CALCIUM_CHANNEL_ACTIVITY	0.128341	0.00954341	MF452	Positive
ANLN	GO_DENDRITE_MEMBRANE	-0.0289163	0.560774	CC157	Negative	ANLN	GO_SODIUM_CHANNEL_REGULATOR_ACTIVITY	0.12815	0.00965172	MF879	Positive
ANLN	GO_TRANSPORTER_COMPLEX	-0.0850007	0.0867766	CC609	Negative	ANLN	GO_SNRNA_BINDING	0.128072	0.00969665	MF877	Positive
ANLN	GO_TELOMERE_CAP_COMPLEX	0.110815	0.0253764	CC583	Positive	ANLN	GO_TYPE_I_INTERFERON_RECEPTOR_BINDING	0.127958	0.00976175	MF988	Positive
ANLN	GO_NUCLEAR_EXOSOME_RNASE_COMPLEX	0.124164	0.0121787	CC388	Positive	ANLN	GO_BITTER_TASTE_RECEPTOR_ACTIVITY	0.127879	0.00980757	MF107	Positive
ANLN	GO_TORC2_COMPLEX	0.113233	0.0223289	CC592	Positive	ANLN	GO_PROTEIN_HORMONE_RECEPTOR_ACTIVITY	0.126895	0.010392	MF752	Positive
ANLN	GO_MICROTUBULE_ASSOCIATED_COMPLEX	0.682485	<2E-16	CC337	Positive	ANLN	GO_LEUCINE_ZIPPER_DOMAIN_BINDING	0.12687	0.0104071	MF449	Positive
ANLN	GO_MICROVILLUS	0.121706	0.0140138	CC341	Positive	ANLN	GO_CCR_CHEMOKINE_RECEPTOR_BINDING	0.126403	0.0106955	MF162	Positive
ANLN	GO_CYTOSOLIC_RIBOSOME	-0.380409	1.78e-15	CC154	Negative	ANLN	GO_PROTEIN_KINASE_A_BINDING	0.12516	0.011498	MF753	Positive
ANLN	GO_PHOTORECEPTOR_OUTER_SEGMENT_MEMBRANE	-0.24782	4.12e-07	CC438	Negative	ANLN	GO_INTERLEUKIN_1_RECEPTOR_BINDING	0.124699	0.0118088	MF418	Positive
ANLN	GO_N_TERMINAL_PROTEIN_ACETYLTRANSFERASE_COMPLEX	0.405642	<2E-16	CC369	Positive	ANLN	GO_LONG_CHAIN_FATTY_ACID_BINDING	-0.124077	0.0122401	MF469	Negative
ANLN	GO_LOW_DENSITY_LIPOPROTEIN_PARTICLE	0.11659	0.018627	CC313	Positive	ANLN	GO_TASTE_RECEPTOR_ACTIVITY	0.123818	0.0124236	MF927	Positive
ANLN	GO_CELL_BODY_MEMBRANE	-0.0968513	0.0508807	CC69	Negative	ANLN	GO_S_ADENOSYLMETHIONINE_DEPENDENT_METHYLTRANSFERASE_ACTIVITY	0.123079	0.0129606	MF848	Positive
ANLN	GO_PCG_PROTEIN_COMPLEX	0.338067	2.44e-12	CC421	Positive	ANLN	GO_ORGANIC_HYDROXY_COMPOUND_TRANSMEMBRANE_TRANSPORTER_ACTIVITY	0.12303	0.0129975	MF611	Positive
ANLN	GO_CHROMOSOME_TELOMERIC_REGION	0.629193	<2E-16	CC89	Positive	ANLN	GO_VOLTAGE_GATED_CATION_CHANNEL_ACTIVITY	-0.123001	0.0130188	MF1014	Negative
ANLN	GO_EXOCYST	-0.000925925	0.985142	CC206	Negative	ANLN	GO_CYTOKINE_RECEPTOR_ACTIVITY	0.122939	0.0130648	MF219	Positive
ANLN	GO_CYTOPLASMIC_DYNEIN_COMPLEX	0.307425	2.34e-10	CC145	Positive	ANLN	GO_AMMONIUM_TRANSMEMBRANE_TRANSPORTER_ACTIVITY	-0.1221	0.0137043	MF63	Negative
ANLN	GO_SMALL_RIBOSOMAL_SUBUNIT	-0.271896	2.49e-08	CC548	Negative	ANLN	GO_INTRONIC_TRANSCRIPTION_REGULATORY_REGION_DNA_BINDING	-0.122096	0.0137072	MF427	Negative
ANLN	GO_HOPS_COMPLEX	-0.0541462	0.275802	CC257	Negative	ANLN	GO_MITOGEN_ACTIVATED_PROTEIN_KINASE_KINASE_KINASE_BINDING	0.121897	0.013863	MF523	Positive
ANLN	GO_GLYCOPROTEIN_COMPLEX	0.00718683	0.88507	CC237	Positive	ANLN	GO_GTP_DEPENDENT_PROTEIN_BINDING	0.119045	0.0162694	MF352	Positive
ANLN	GO_MICROTUBULE_ORGANIZING_CENTER_ATTACHMENT_SITE	0.101482	0.0407252	CC339	Positive	ANLN	GO_ORGANOPHOSPHATE_ESTER_TRANSMEMBRANE_TRANSPORTER_ACTIVITY	-0.11839	0.0168719	MF612	Negative
ANLN	GO_CLATHRIN_COAT	0.323719	2.21e-11	CC100	Positive	ANLN	GO_GLYCINE_BINDING	0.11827	0.0169843	MF346	Positive
ANLN	GO_MHC_PROTEIN_COMPLEX	0.063434	0.201573	CC331	Positive	ANLN	GO_COFACTOR_BINDING	-0.117961	0.0172764	MF188	Negative
ANLN	GO_VESICLE_TETHERING_COMPLEX	-0.0498958	0.315311	CC627	Negative	ANLN	GO_IRON_ION_BINDING	-0.116558	0.0186599	MF435	Negative
ANLN	GO_MYOSIN_FILAMENT	0.0763786	0.123953	CC367	Positive	ANLN	GO_PHOSPHATIDIC_ACID_BINDING	0.116351	0.0188718	MF673	Positive
ANLN	GO_CELL_CELL_JUNCTION	0.259074	1.15e-07	CC71	Positive	ANLN	GO_NON_MEMBRANE_SPANNING_PROTEIN_TYROSINE_KINASE_ACTIVITY	0.115896	0.019345	MF572	Positive
ANLN	GO_PALMITOYLTRANSFERASE_COMPLEX	-0.00371205	0.940487	CC418	Negative	ANLN	GO_LAMININ_BINDING	0.115858	0.0193853	MF448	Positive
ANLN	GO_MULTIVESICULAR_BODY	-0.0342975	0.490193	CC361	Negative	ANLN	GO_REPRESSING_TRANSCRIPTION_FACTOR_BINDING	0.114306	0.0210823	MF809	Positive
ANLN	GO_CATALYTIC_STEP_2_SPLICEOSOME	0.297203	9.59e-10	CC62	Positive	ANLN	GO_PSEUDOURIDINE_SYNTHASE_ACTIVITY	0.113465	0.0220544	MF784	Positive
ANLN	GO_ORGANELLE_MEMBRANE_CONTACT_SITE	0.410504	<2E-16	CC412	Positive	ANLN	GO_CYTOKINE_BINDING	0.113166	0.02241	MF218	Positive
ANLN	GO_BOX_H_ACA_RNP_COMPLEX	0.151224	0.0022203	CC53	Positive	ANLN	GO_PROTEIN_KINASE_A_CATALYTIC_SUBUNIT_BINDING	0.111564	0.0243968	MF754	Positive
ANLN	GO_SARCOPLASMIC_RETICULUM_MEMBRANE	0.144236	0.00354371	CC529	Positive	ANLN	GO_MAP_KINASE_PHOSPHATASE_ACTIVITY	0.109077	0.0277828	MF494	Positive
ANLN	GO_CLATHRIN_COATED_VESICLE	0.247882	4.09e-07	CC106	Positive	ANLN	GO_SUGAR_TRANSMEMBRANE_TRANSPORTER_ACTIVITY	-0.108294	0.0289288	MF913	Negative
ANLN	GO_AP_TYPE_MEMBRANE_COAT_ADAPTOR_COMPLEX	0.185292	0.00017043	CC23	Positive	ANLN	GO_WW_DOMAIN_BINDING	-0.107703	0.0298206	MF1025	Negative
ANLN	GO_CLATHRIN_COATED_ENDOCYTIC_VESICLE	0.218536	8.62e-06	CC103	Positive	ANLN	GO_GUANYL_NUCLEOTIDE_EXCHANGE_FACTOR_ACTIVITY	0.106304	0.032026	MF359	Positive
ANLN	GO_GLUTAMATERGIC_SYNAPSE	0.216638	1.04e-05	CC236	Positive	ANLN	GO_SERINE_TYPE_ENDOPEPTIDASE_INHIBITOR_ACTIVITY	0.10398	0.0359976	MF858	Positive
ANLN	GO_INTRACILIARY_TRANSPORT_PARTICLE	-0.081181	0.101959	CC277	Negative	ANLN	GO_MYOSIN_V_BINDING	0.102822	0.0381276	MF543	Positive
ANLN	GO_TRANSCRIPTION_FACTOR_TFIIH_HOLO_COMPLEX	0.261125	9.05e-08	CC601	Positive	ANLN	GO_DIPEPTIDYL_PEPTIDASE_ACTIVITY	-0.101076	0.0415418	MF236	Negative
ANLN	GO_PERICENTRIC_HETEROCHROMATIN	0.749206	<2E-16	CC423	Positive	ANLN	GO_PHOSPHATIDYLINOSITOL_MONOPHOSPHATE_PHOSPHATASE_ACTIVITY	0.100537	0.042646	MF693	Positive
ANLN	GO_METHYLOSOME	0.113328	0.022217	CC328	Positive	ANLN	GO_HYDROLASE_ACTIVITY_HYDROLYZING_N_GLYCOSYL_COMPOUNDS	0.100063	0.0436381	MF399	Positive
ANLN	GO_POSTSYNAPTIC_ENDOSOME	-0.367032	2e-14	CC460	Negative	ANLN	GO_HYDROLASE_ACTIVITY_ACTING_ON_CARBON_NITROGEN_BUT_NOT_PEPTIDE_BONDS_IN_LINEAR_AMIDINES	-0.0999336	0.043912	MF396	Negative
ANLN	GO_COPI_COATED_VESICLE	0.3135	9.87e-11	CC129	Positive	ANLN	GO_METALLOCARBOXYPEPTIDASE_ACTIVITY	0.0991771	0.0455434	MF501	Positive
ANLN	GO_MUSCLE_MYOSIN_COMPLEX	-0.17015	0.000566311	CC363	Negative	ANLN	GO_CALMODULIN_DEPENDENT_PROTEIN_KINASE_ACTIVITY	0.099137	0.0456312	MF130	Positive
ANLN	GO_DIHYDROLIPOYL_DEHYDROGENASE_COMPLEX	0.166489	0.000746207	CC164	Positive	ANLN	GO_PHOSPHOTRANSFERASE_ACTIVITY_PHOSPHATE_GROUP_AS_ACCEPTOR	-0.0990154	0.0458987	MF714	Negative
ANLN	GO_CLATHRIN_COATED_VESICLE_MEMBRANE	0.264191	6.31e-08	CC107	Positive	ANLN	GO_E_BOX_BINDING	0.0979688	0.0482545	MF264	Positive
ANLN	GO_RIBONUCLEOPROTEIN_GRANULE	0.371652	8.88e-15	CC509	Positive	ANLN	GO_GATED_CHANNEL_ACTIVITY	-0.0973111	0.0497861	MF331	Negative
ANLN	GO_ESCRT_COMPLEX	-0.270159	3.08e-08	CC198	Negative	ANLN	GO_LIGASE_ACTIVITY_FORMING_CARBON_SULFUR_BONDS	-0.0966999	0.0512456	MF459	Negative
ANLN	GO_RECYCLING_ENDOSOME	0.1477	0.00281757	CC497	Positive	ANLN	GO_CARGO_RECEPTOR_ACTIVITY	0.0966028	0.0514808	MF151	Positive
ANLN	GO_SYNAPTIC_MEMBRANE	0.133786	0.006874	CC577	Positive	ANLN	GO_LYASE_ACTIVITY	0.0961161	0.0526728	MF476	Positive
ANLN	GO_MICROTUBULE_END	0.655714	<2E-16	CC338	Positive	ANLN	GO_ACID_AMINO_ACID_LIGASE_ACTIVITY	-0.09493	0.0556745	MF22	Negative
ANLN	GO_GOLGI_CISTERNA_MEMBRANE	0.0934234	0.059691	CC242	Positive	ANLN	GO_SOLUTE_CATION_SYMPORTER_ACTIVITY	0.0949052	0.0557389	MF888	Positive
ANLN	GO_INO80_TYPE_COMPLEX	0.0800464	0.106854	CC269	Positive	ANLN	GO_FUCOSYLTRANSFERASE_ACTIVITY	0.0947528	0.0561351	MF314	Positive
ANLN	GO_CATALYTIC_STEP_1_SPLICEOSOME	0.330159	8.33e-12	CC61	Positive	ANLN	GO_SEROTONIN_RECEPTOR_ACTIVITY	0.0946454	0.0564156	MF859	Positive
ANLN	GO_BASOLATERAL_PLASMA_MEMBRANE	0.134037	0.00676902	CC47	Positive	ANLN	GO_WNT_ACTIVATED_RECEPTOR_ACTIVITY	0.093738	0.0588331	MF1023	Positive
ANLN	GO_TOR_COMPLEX	0.152598	0.00202063	CC591	Positive	ANLN	GO_INOSITOL_PHOSPHATE_PHOSPHATASE_ACTIVITY	0.0935313	0.0593955	MF411	Positive
ANLN	GO_CULLIN_RING_UBIQUITIN_LIGASE_COMPLEX	0.309315	1.79e-10	CC142	Positive	ANLN	GO_ANTIPORTER_ACTIVITY	0.0934388	0.0596488	MF75	Positive
ANLN	GO_RNA_POLYMERASE_I_COMPLEX	0.0775966	0.118054	CC514	Positive	ANLN	GO_SNARE_BINDING	0.0933666	0.0598469	MF875	Positive
ANLN	GO_COATED_VESICLE	0.362397	4.46e-14	CC112	Positive	ANLN	GO_WNT_PROTEIN_BINDING	0.0932849	0.0600719	MF1024	Positive
ANLN	GO_MEMBRANE_REGION	0.256485	1.55e-07	CC327	Positive	ANLN	GO_INSULIN_LIKE_GROWTH_FACTOR_BINDING	0.0931276	0.0605069	MF412	Positive
ANLN	GO_PHOSPHATASE_COMPLEX	0.364313	3.2e-14	CC432	Positive	ANLN	GO_TRANSMEMBRANE_RECEPTOR_PROTEIN_TYROSINE_KINASE_ACTIVITY	0.0914971	0.0651719	MF976	Positive
ANLN	GO_TRANSCRIPTIONALLY_ACTIVE_CHROMATIN	0.336347	3.2e-12	CC604	Positive	ANLN	GO_ADRENERGIC_RECEPTOR_BINDING	0.091192	0.0660767	MF42	Positive
ANLN	GO_PLASMA_MEMBRANE_SIGNALING_RECEPTOR_COMPLEX	0.131966	0.00768083	CC442	Positive	ANLN	GO_CHEMOATTRACTANT_ACTIVITY	0.0908426	0.0671258	MF170	Positive
ANLN	GO_ENDOPLASMIC_RETICULUM_EXIT_SITE	0.330901	7.43e-12	CC185	Positive	ANLN	GO_NEUROPEPTIDE_RECEPTOR_ACTIVITY	0.0905667	0.0679635	MF561	Positive
ANLN	GO_CYTOPLASMIC_MICROTUBULE	0.523296	<2E-16	CC147	Positive	ANLN	GO_RNA_METHYLTRANSFERASE_ACTIVITY	0.0905423	0.0680383	MF828	Positive
ANLN	GO_LARGE_RIBOSOMAL_SUBUNIT	-0.283841	5.58e-09	CC306	Negative	ANLN	GO_CAMP_BINDING	0.0902015	0.0690859	MF131	Positive
ANLN	GO_I_BAND	0.047231	0.341884	CC261	Positive	ANLN	GO_SIGNALING_ADAPTOR_ACTIVITY	0.0900633	0.0695146	MF866	Positive
ANLN	GO_PHOTORECEPTOR_CONNECTING_CILIUM	0.080994	0.102754	CC434	Positive	ANLN	GO_NUCLEOTIDE_TRANSMEMBRANE_TRANSPORTER_ACTIVITY	0.0891732	0.0723276	MF595	Positive
ANLN	GO_SPINDLE_MIDZONE	0.741154	<2E-16	CC565	Positive	ANLN	GO_S_ACYLTRANSFERASE_ACTIVITY	0.0890303	0.0727877	MF847	Positive
ANLN	GO_INTEGRAL_COMPONENT_OF_SYNAPTIC_VESICLE_MEMBRANE	-0.126398	0.010699	CC271	Negative	ANLN	GO_CHEMOKINE_BINDING	0.0886104	0.0741537	MF172	Positive
ANLN	GO_HISTONE_DEACETYLASE_COMPLEX	0.109746	0.0268344	CC255	Positive	ANLN	GO_TRANSCRIPTION_COACTIVATOR_BINDING	0.0884626	0.0746394	MF944	Positive
ANLN	GO_MEMBRANE_COAT	0.39593	<2E-16	CC326	Positive	ANLN	GO_BETA_CATENIN_BINDING	0.0871581	0.07904	MF99	Positive
ANLN	GO_UBIQUITIN_LIGASE_COMPLEX	0.403438	<2E-16	CC620	Positive	ANLN	GO_TRANSMEMBRANE_RECEPTOR_PROTEIN_KINASE_ACTIVITY	0.085524	0.0848464	MF972	Positive
ANLN	GO_CENTRIOLE	0.62767	<2E-16	CC80	Positive	ANLN	GO_MONOVALENT_INORGANIC_CATION_TRANSMEMBRANE_TRANSPORTER_ACTIVITY	-0.0853822	0.085366	MF533	Negative
ANLN	GO_POLYSOME	0.0174076	0.726239	CC453	Positive	ANLN	GO_TRANSFERASE_ACTIVITY_TRANSFERRING_ONE_CARBON_GROUPS	0.0853468	0.0854959	MF954	Positive
ANLN	GO_COLLAGEN_TRIMER	0.0932386	0.0601996	CC116	Positive	ANLN	GO_PHOSPHOLIPID_TRANSPORTER_ACTIVITY	0.084736	0.0877666	MF707	Positive
ANLN	GO_APICAL_PART_OF_CELL	0.180475	0.000252365	CC26	Positive	ANLN	GO_PHOSPHATIDYLINOSITOL_BISPHOSPHATE_BINDING	0.0845097	0.0886199	MF690	Positive
ANLN	GO_CHAPERONIN_CONTAINING_T_COMPLEX	0.45327	<2E-16	CC82	Positive	ANLN	GO_MITOGEN_ACTIVATED_PROTEIN_KINASE_KINASE_BINDING	-0.0828417	0.0951177	MF522	Negative
ANLN	GO_LATERAL_ELEMENT	0.639877	<2E-16	CC309	Positive	ANLN	GO_TRANSMITTER_GATED_CHANNEL_ACTIVITY	0.082533	0.0963612	MF978	Positive
ANLN	GO_U2_TYPE_SPLICEOSOMAL_COMPLEX	0.211552	1.68e-05	CC617	Positive	ANLN	GO_ATPASE_BINDING	0.0819183	0.0988752	MF91	Positive
ANLN	GO_APICAL_JUNCTION_COMPLEX	0.153363	0.00191672	CC25	Positive	ANLN	GO_HORMONE_BINDING	0.0814999	0.100616	MF385	Positive
ANLN	GO_EXTRINSIC_COMPONENT_OF_ORGANELLE_MEMBRANE	-0.139829	0.00471105	CC215	Negative	ANLN	GO_ORGANIC_ACID_SODIUM_SYMPORTER_ACTIVITY	0.08087	0.103283	MF607	Positive
ANLN	GO_NUCLEAR_OUTER_MEMBRANE	0.293112	1.66e-09	CC395	Positive	ANLN	GO_PHOSPHORIC_DIESTER_HYDROLASE_ACTIVITY	-0.080648	0.104236	MF710	Negative
ANLN	GO_NUCLEAR_ENVELOPE	0.691074	<2E-16	CC386	Positive	ANLN	GO_RAC_GUANYL_NUCLEOTIDE_EXCHANGE_FACTOR_ACTIVITY	-0.080291	0.105783	MF796	Negative
ANLN	GO_DENDRITIC_SPINE_MEMBRANE	0.0242104	0.626261	CC161	Positive	ANLN	GO_OXIDOREDUCTASE_ACTIVITY_ACTING_ON_THE_ALDEHYDE_OR_OXO_GROUP_OF_DONORS	0.0800469	0.106851	MF631	Positive
ANLN	GO_TELOMERASE_HOLOENZYME_COMPLEX	0.495462	<2E-16	CC582	Positive	ANLN	GO_SULFUR_COMPOUND_TRANSMEMBRANE_TRANSPORTER_ACTIVITY	-0.0799564	0.10725	MF917	Negative
ANLN	GO_POSTSYNAPTIC_SPECIALIZATION_INTRACELLULAR_COMPONENT	0.164143	0.000887875	CC462	Positive	ANLN	GO_O_ACYLTRANSFERASE_ACTIVITY	-0.0797131	0.108326	MF597	Negative
ANLN	GO_TRANSCRIPTION_FACTOR_TFTC_COMPLEX	0.303376	4.12e-10	CC602	Positive	ANLN	GO_AMINOPEPTIDASE_ACTIVITY	-0.078976	0.11164	MF61	Negative
ANLN	GO_RNA_POLYMERASE_II_HOLOENZYME	0.283139	6.1e-09	CC516	Positive	ANLN	GO_GLYCOSAMINOGLYCAN_BINDING	0.0789038	0.111969	MF348	Positive
ANLN	GO_SPLICEOSOMAL_COMPLEX	0.23422	1.78e-06	CC568	Positive	ANLN	GO_CARBON_CARBON_LYASE_ACTIVITY	-0.0786943	0.112927	MF140	Negative
ANLN	GO_ESCRT_I_COMPLEX	-0.337996	2.47e-12	CC199	Negative	ANLN	GO_EXTRACELLULAR_MATRIX_STRUCTURAL_CONSTITUENT	0.0785163	0.113746	MF294	Positive
ANLN	GO_SMALL_SUBUNIT_PROCESSOME	0.235267	1.59e-06	CC549	Positive	ANLN	GO_STRUCTURAL_CONSTITUENT_OF_MUSCLE	-0.077248	0.11972	MF905	Negative
ANLN	GO_HIPPOCAMPAL_MOSSY_FIBER_TO_CA3_SYNAPSE	0.15036	0.00235491	CC254	Positive	ANLN	GO_ORGANIC_ACID_BINDING	0.0761099	0.125286	MF606	Positive
ANLN	GO_RNAI_EFFECTOR_COMPLEX	0.332849	5.51e-12	CC520	Positive	ANLN	GO_PASSIVE_TRANSMEMBRANE_TRANSPORTER_ACTIVITY	-0.0758579	0.126545	MF647	Negative
ANLN	GO_CYTOPLASMIC_UBIQUITIN_LIGASE_COMPLEX	0.18779	0.0001385	CC152	Positive	ANLN	GO_MANNOSYLTRANSFERASE_ACTIVITY	0.0751319	0.130227	MF490	Positive
ANLN	GO_PLATELET_DENSE_GRANULE	-0.0911462	0.0662136	CC446	Negative	ANLN	GO_INTRACELLULAR_LIGAND_GATED_ION_CHANNEL_ACTIVITY	0.0748871	0.131487	MF421	Positive
ANLN	GO_PLASMA_MEMBRANE_BOUNDED_CELL_PROJECTION_CYTOPLASM	0.318561	4.73e-11	CC440	Positive	ANLN	GO_CIS_TRANS_ISOMERASE_ACTIVITY	0.0744901	0.133551	MF181	Positive
ANLN	GO_MIDBODY	0.742262	<2E-16	CC343	Positive	ANLN	GO_ANKYRIN_BINDING	0.0744662	0.133676	MF71	Positive
ANLN	GO_ROUGH_ENDOPLASMIC_RETICULUM	0.223746	5.17e-06	CC521	Positive	ANLN	GO_COPPER_ION_BINDING	-0.0741113	0.135544	MF192	Negative
ANLN	GO_NEUROTRANSMITTER_RECEPTOR_COMPLEX	-0.0415463	0.403184	CC379	Negative	ANLN	GO_INORGANIC_ANION_EXCHANGER_ACTIVITY	-0.0737759	0.137327	MF408	Negative
ANLN	GO_SPECIFIC_GRANULE	0.155097	0.00169906	CC557	Positive	ANLN	GO_DEATH_RECEPTOR_BINDING	0.073316	0.139801	MF227	Positive
ANLN	GO_ENDOPLASMIC_RETICULUM_GOLGI_INTERMEDIATE_COMPARTMENT_MEMBRANE	0.341135	1.5e-12	CC187	Positive	ANLN	GO_PHOSPHATIDYLINOSITOL_PHOSPHATE_5_PHOSPHATASE_ACTIVITY	0.0728395	0.1424	MF694	Positive
ANLN	GO_LAMELLIPODIUM	0.286633	3.89e-09	CC303	Positive	ANLN	GO_TRANSLATION_ELONGATION_FACTOR_ACTIVITY	0.0724316	0.144655	MF963	Positive
ANLN	GO_SMALL_NUCLEAR_RIBONUCLEOPROTEIN_COMPLEX	0.169045	0.00061583	CC546	Positive	ANLN	GO_ACETYLCHOLINE_BINDING	0.0723184	0.145285	MF15	Positive
ANLN	GO_PML_BODY	0.46482	<2E-16	CC449	Positive	ANLN	GO_CYCLASE_ACTIVITY	0.0722845	0.145474	MF198	Positive
ANLN	GO_ZYMOGEN_GRANULE_MEMBRANE	-0.0175755	0.723707	CC633	Negative	ANLN	GO_FLAVIN_ADENINE_DINUCLEOTIDE_BINDING	-0.0708113	0.15388	MF309	Negative
ANLN	GO_ANCHORED_COMPONENT_OF_SYNAPTIC_VESICLE_MEMBRANE	-0.259735	1.06e-07	CC22	Negative	ANLN	GO_POLYSACCHARIDE_BINDING	-0.0703831	0.156391	MF724	Negative
ANLN	GO_NUCLEAR_CHROMOSOME_TELOMERIC_REGION	0.587044	<2E-16	CC384	Positive	ANLN	GO_SULFUR_COMPOUND_BINDING	0.0702659	0.157083	MF916	Positive
ANLN	GO_NEURON_PROJECTION_CYTOPLASM	0.246026	5.02e-07	CC374	Positive	ANLN	GO_DIACYLGLYCEROL_BINDING	-0.068772	0.166115	MF231	Negative
ANLN	GO_LATE_ENDOSOME	0.121214	0.0144091	CC307	Positive	ANLN	GO_GABA_RECEPTOR_ACTIVITY	0.0680963	0.170326	MF325	Positive
ANLN	GO_HIGH_DENSITY_LIPOPROTEIN_PARTICLE	-0.0537415	0.279412	CC253	Negative	ANLN	GO_PDZ_DOMAIN_BINDING	0.0667757	0.178784	MF649	Positive
ANLN	GO_NURD_COMPLEX	0.084595	0.0882976	CC407	Positive	ANLN	GO_CARBONATE_DEHYDRATASE_ACTIVITY	-0.065614	0.18648	MF144	Negative
ANLN	GO_CARBOXY_TERMINAL_DOMAIN_PROTEIN_KINASE_COMPLEX	0.348944	4.26e-13	CC60	Positive	ANLN	GO_N_METHYLTRANSFERASE_ACTIVITY	0.0655389	0.186985	MF547	Positive
ANLN	GO_AUTOPHAGOSOME	0.239012	1.07e-06	CC34	Positive	ANLN	GO_PALMITOYLTRANSFERASE_ACTIVITY	0.06447	0.194293	MF646	Positive
ANLN	GO_CYTOPLASMIC_REGION	0.399461	<2E-16	CC148	Positive	ANLN	GO_IMMUNOGLOBULIN_BINDING	0.0644149	0.194675	MF405	Positive
ANLN	GO_TRANS_GOLGI_NETWORK_TRANSPORT_VESICLE	0.241789	7.96e-07	CC595	Positive	ANLN	GO_PROTEIN_SERINE_THREONINE_KINASE_INHIBITOR_ACTIVITY	0.0642443	0.195862	MF771	Positive
ANLN	GO_AGGRESOME	0.366846	2.07e-14	CC15	Positive	ANLN	GO_HEPARIN_BINDING	0.0639917	0.197629	MF366	Positive
ANLN	GO_INHIBITORY_SYNAPSE	-0.0926505	0.0618426	CC267	Negative	ANLN	GO_RETINOID_X_RECEPTOR_BINDING	0.0627861	0.206225	MF813	Positive
ANLN	GO_RIBOSOMAL_SUBUNIT	-0.287794	3.34e-09	CC510	Negative	ANLN	GO_ICOSANOID_RECEPTOR_ACTIVITY	-0.0616477	0.214587	MF402	Negative
ANLN	GO_CUL2_RING_UBIQUITIN_LIGASE_COMPLEX	-0.0219058	0.659484	CC138	Negative	ANLN	GO_POTASSIUM_CHANNEL_ACTIVITY	-0.0601073	0.226285	MF727	Negative
ANLN	GO_CONTRACTILE_FIBER	0.12593	0.0109949	CC126	Positive	ANLN	GO_PEPTIDE_HORMONE_BINDING	-0.0599247	0.227702	MF657	Negative
ANLN	GO_CUL3_RING_UBIQUITIN_LIGASE_COMPLEX	0.0763753	0.12397	CC139	Positive	ANLN	GO_DICARBOXYLIC_ACID_TRANSMEMBRANE_TRANSPORTER_ACTIVITY	0.0597835	0.2288	MF233	Positive
ANLN	GO_XY_BODY	0.419399	<2E-16	CC631	Positive	ANLN	GO_VOLTAGE_GATED_ION_CHANNEL_ACTIVITY	-0.0586993	0.237368	MF1016	Negative
ANLN	GO_NEUROMUSCULAR_JUNCTION	0.133826	0.00685705	CC373	Positive	ANLN	GO_PHOSPHATIDYLINOSITOL_3_PHOSPHATE_BINDING	0.0585791	0.238332	MF684	Positive
ANLN	GO_OUTER_MITOCHONDRIAL_MEMBRANE_PROTEIN_COMPLEX	0.135371	0.00623405	CC415	Positive	ANLN	GO_OXIDOREDUCTASE_ACTIVITY_ACTING_ON_NAD_P_H_OXYGEN_AS_ACCEPTOR	0.0578923	0.24389	MF624	Positive
ANLN	GO_APICOLATERAL_PLASMA_MEMBRANE	-0.0390296	0.432296	CC28	Negative	ANLN	GO_PHOSPHATIDYLINOSITOL_3_4_BISPHOSPHATE_BINDING	0.0570918	0.250482	MF678	Positive
ANLN	GO_CALYX_OF_HELD	0.180132	0.000259429	CC58	Positive	ANLN	GO_CALCIUM_ION_TRANSMEMBRANE_TRANSPORTER_ACTIVITY	-0.0564498	0.255858	MF126	Negative
ANLN	GO_DENSE_CORE_GRANULE	-0.169638	0.000588759	CC162	Negative	ANLN	GO_FERROUS_IRON_BINDING	0.0558583	0.260881	MF304	Positive
ANLN	GO_INFLAMMASOME_COMPLEX	0.0291406	0.557737	CC266	Positive	ANLN	GO_ANTIGEN_BINDING	0.0558275	0.261144	MF73	Positive
ANLN	GO_RIBONUCLEASE_P_COMPLEX	-0.0340006	0.49396	CC508	Negative	ANLN	GO_MYOSIN_BINDING	0.0556691	0.262502	MF540	Positive
ANLN	GO_ENDORIBONUCLEASE_COMPLEX	0.139862	0.0047009	CC192	Positive	ANLN	GO_OXIDOREDUCTASE_ACTIVITY_ACTING_ON_SINGLE_DONORS_WITH_INCORPORATION_OF_MOLECULAR_OXYGEN	0.0550653	0.267722	MF630	Positive
ANLN	GO_ACTIN_FILAMENT	0.231101	2.45e-06	CC10	Positive	ANLN	GO_STEROL_TRANSPORTER_ACTIVITY	-0.0546528	0.271328	MF901	Negative
ANLN	GO_INTERMEDIATE_FILAMENT_CYTOSKELETON	0.27059	2.92e-08	CC275	Positive	ANLN	GO_TRANSFORMING_GROWTH_FACTOR_BETA_BINDING	0.0542335	0.275027	MF958	Positive
ANLN	GO_NUCLEOTIDE_EXCISION_REPAIR_COMPLEX	0.289145	2.8e-09	CC406	Positive	ANLN	GO_SCAVENGER_RECEPTOR_ACTIVITY	0.0540058	0.27705	MF851	Positive
ANLN	GO_KINESIN_COMPLEX	0.735072	<2E-16	CC299	Positive	ANLN	GO_FMN_BINDING	0.0538108	0.278792	MF310	Positive
ANLN	GO_DENDRITE_TERMINUS	0.154815	0.00173279	CC158	Positive	ANLN	GO_RHO_GUANYL_NUCLEOTIDE_EXCHANGE_FACTOR_ACTIVITY	0.0532765	0.283599	MF817	Positive
ANLN	GO_MITOCHONDRIAL_PROTEIN_COMPLEX	-0.187932	0.000136869	CC348	Negative	ANLN	GO_PALMITOYL_COA_HYDROLASE_ACTIVITY	0.0527432	0.288453	MF644	Positive
ANLN	GO_SAGA_COMPLEX	0.11925	0.0160855	CC525	Positive	ANLN	GO_OXIDOREDUCTASE_ACTIVITY_ACTING_ON_THE_CH_CH_GROUP_OF_DONORS_NAD_OR_NADP_AS_ACCEPTOR	-0.0518054	0.297125	MF634	Negative
ANLN	GO_DENDRITIC_SHAFT	0.12738	0.0101003	CC159	Positive	ANLN	GO_VOLTAGE_GATED_POTASSIUM_CHANNEL_ACTIVITY	-0.0507808	0.306793	MF1017	Negative
ANLN	GO_PROTON_TRANSPORTING_TWO_SECTOR_ATPASE_COMPLEX	0.00562715	0.909892	CC489	Positive	ANLN	GO_DEATH_RECEPTOR_ACTIVITY	0.0507209	0.307365	MF226	Positive
ANLN	GO_CELL_SUBSTRATE_JUNCTION	0.299569	6.95e-10	CC77	Positive	ANLN	GO_CALCIUM_DEPENDENT_PROTEIN_BINDING	-0.0502044	0.312324	MF124	Negative
ANLN	GO_INVADOPODIUM	0.414804	<2E-16	CC295	Positive	ANLN	GO_OLFACTORY_RECEPTOR_ACTIVITY	-0.0498413	0.315841	MF600	Negative
ANLN	GO_LATE_ENDOSOME_MEMBRANE	0.0510389	0.304338	CC308	Positive	ANLN	GO_G_PROTEIN_COUPLED_AMINE_RECEPTOR_ACTIVITY	-0.0491374	0.322732	MF318	Negative
ANLN	GO_PERINUCLEAR_ENDOPLASMIC_RETICULUM	-0.180797	0.000245909	CC426	Negative	ANLN	GO_PROTEIN_DISULFIDE_OXIDOREDUCTASE_ACTIVITY	0.0484798	0.329259	MF749	Positive
ANLN	GO_P_BODY	0.235885	1.49e-06	CC417	Positive	ANLN	GO_LYSOPHOSPHOLIPID_ACYLTRANSFERASE_ACTIVITY	0.0478535	0.335552	MF482	Positive
ANLN	GO_SMOOTH_ENDOPLASMIC_RETICULUM	0.141655	0.00419052	CC552	Positive	ANLN	GO_ORGANIC_ANION_TRANSMEMBRANE_TRANSPORTER_ACTIVITY	0.0468452	0.345846	MF609	Positive
ANLN	GO_IMMUNOGLOBULIN_COMPLEX	0.0150563	0.762017	CC262	Positive	ANLN	GO_INWARD_RECTIFIER_POTASSIUM_CHANNEL_ACTIVITY	-0.0467556	0.34677	MF428	Negative
ANLN	GO_COMPACT_MYELIN	0.200777	4.51e-05	CC117	Positive	ANLN	GO_EXCITATORY_EXTRACELLULAR_LIGAND_GATED_ION_CHANNEL_ACTIVITY	0.045507	0.359814	MF284	Positive
ANLN	GO_ANCHORED_COMPONENT_OF_EXTERNAL_SIDE_OF_PLASMA_MEMBRANE	0.0520704	0.294657	CC18	Positive	ANLN	GO_EXTRACELLULAR_LIGAND_GATED_ION_CHANNEL_ACTIVITY	0.0453243	0.361748	MF291	Positive
ANLN	GO_CONDENSED_CHROMOSOME	0.732357	<2E-16	CC119	Positive	ANLN	GO_UBIQUITIN_UBIQUITIN_LIGASE_ACTIVITY	0.045306	0.361942	MF1001	Positive
ANLN	GO_ER_MEMBRANE_PROTEIN_COMPLEX	0.20507	3.06e-05	CC195	Positive	ANLN	GO_GROWTH_FACTOR_ACTIVITY	0.0443659	0.371999	MF349	Positive
ANLN	GO_ENDOPLASMIC_RETICULUM_GOLGI_INTERMEDIATE_COMPARTMENT	0.380079	2e-15	CC186	Positive	ANLN	GO_MANNOSIDASE_ACTIVITY	0.0441401	0.37444	MF489	Positive
ANLN	GO_TRANSCRIPTION_ELONGATION_FACTOR_COMPLEX	0.383044	1.11e-15	CC597	Positive	ANLN	GO_PEPTIDE_HORMONE_RECEPTOR_BINDING	0.0431872	0.38485	MF658	Positive
ANLN	GO_MYOSIN_II_COMPLEX	-0.0997677	0.0442654	CC368	Negative	ANLN	GO_TRANSMEMBRANE_RECEPTOR_PROTEIN_PHOSPHATASE_ACTIVITY	-0.0410454	0.408883	MF973	Negative
ANLN	GO_ARP2_3_PROTEIN_COMPLEX	0.232679	2.09e-06	CC29	Positive	ANLN	GO_FIBROBLAST_GROWTH_FACTOR_BINDING	0.0407052	0.412781	MF305	Positive
ANLN	GO_CAJAL_BODY	0.424655	<2E-16	CC56	Positive	ANLN	GO_PROTEIN_KINASE_C_BINDING	0.0398119	0.423118	MF758	Positive
ANLN	GO_DENDRITIC_SPINE_HEAD	-0.0204165	0.681319	CC160	Negative	ANLN	GO_2_IRON_2_SULFUR_CLUSTER_BINDING	0.0396178	0.425385	MF5	Positive
ANLN	GO_CONNEXIN_COMPLEX	-0.0125336	0.800972	CC125	Negative	ANLN	GO_PEPTIDE_RECEPTOR_ACTIVITY	0.0395467	0.426217	MF660	Positive
ANLN	GO_PROTON_TRANSPORTING_V_TYPE_ATPASE_COMPLEX	0.0443815	0.371831	CC492	Positive	ANLN	GO_SH3_SH2_ADAPTOR_ACTIVITY	0.0391685	0.430658	MF862	Positive
ANLN	GO_EXCITATORY_SYNAPSE	0.0409067	0.410469	CC205	Positive	ANLN	GO_PHOSPHOLIPASE_C_ACTIVITY	0.0388544	0.434366	MF703	Positive
ANLN	GO_SEMAPHORIN_RECEPTOR_COMPLEX	0.150291	0.00236609	CC536	Positive	ANLN	GO_GABA_RECEPTOR_BINDING	0.0379489	0.445159	MF326	Positive
ANLN	GO_INTRINSIC_COMPONENT_OF_SYNAPTIC_MEMBRANE	0.0130643	0.792733	CC293	Positive	ANLN	GO_RIBONUCLEASE_P_ACTIVITY	-0.0378272	0.446621	MF819	Negative
ANLN	GO_CAMP_DEPENDENT_PROTEIN_KINASE_COMPLEX	0.188655	0.000128818	CC59	Positive	ANLN	GO_HMG_BOX_DOMAIN_BINDING	0.0375803	0.449595	MF383	Positive
ANLN	GO_FICOLIN_1_RICH_GRANULE_MEMBRANE	0.269679	3.27e-08	CC222	Positive	ANLN	GO_MANNOSE_BINDING	0.0372264	0.453879	MF488	Positive
ANLN	GO_SCHMIDT_LANTERMAN_INCISURE	0.274178	1.88e-08	CC532	Positive	ANLN	GO_GLUTAMATE_RECEPTOR_ACTIVITY	0.0359903	0.469017	MF342	Positive
ANLN	GO_NUCLEAR_PORE_OUTER_RING	0.605238	<2E-16	CC399	Positive	ANLN	GO_PHOSPHATIDYLINOSITOL_PHOSPHATE_PHOSPHATASE_ACTIVITY	0.0339329	0.494821	MF697	Positive
ANLN	GO_CELL_CELL_CONTACT_ZONE	0.239881	9.77e-07	CC70	Positive	ANLN	GO_PHOSPHOTRANSFERASE_ACTIVITY_FOR_OTHER_SUBSTITUTED_PHOSPHATE_GROUPS	-0.0333897	0.501757	MF713	Negative
ANLN	GO_PERIKARYON	-0.0436406	0.379875	CC425	Negative	ANLN	GO_RETINOL_BINDING	-0.0329441	0.507486	MF814	Negative
ANLN	GO_RNA_CAP_BINDING_COMPLEX	0.486927	<2E-16	CC512	Positive	ANLN	GO_LIPID_TRANSPORTER_ACTIVITY	-0.0325399	0.512712	MF464	Negative
ANLN	GO_PORE_COMPLEX	-0.0612258	0.217747	CC454	Negative	ANLN	GO_RNA_POLYMERASE_II_ACTIVATING_TRANSCRIPTION_FACTOR_BINDING	0.0324897	0.513362	MF833	Positive
ANLN	GO_MOTILE_CILIUM	-0.0947128	0.0562395	CC357	Negative	ANLN	GO_INSULIN_LIKE_GROWTH_FACTOR_RECEPTOR_BINDING	0.0323567	0.515089	MF414	Positive
ANLN	GO_DOPAMINERGIC_SYNAPSE	0.136702	0.00573849	CC171	Positive	ANLN	GO_UDP_GLYCOSYLTRANSFERASE_ACTIVITY	0.0322219	0.516842	MF1003	Positive
ANLN	GO_PARANODE_REGION_OF_AXON	-0.0720164	0.146977	CC420	Negative	ANLN	GO_BIOACTIVE_LIPID_RECEPTOR_ACTIVITY	-0.0316169	0.524747	MF106	Negative
ANLN	GO_TRANSLATION_PREINITIATION_COMPLEX	0.0846604	0.0880508	CC606	Positive	ANLN	GO_ARF_GUANYL_NUCLEOTIDE_EXCHANGE_FACTOR_ACTIVITY	-0.0315258	0.525943	MF78	Negative
ANLN	GO_MICROFIBRIL	0.187414	0.00014292	CC335	Positive	ANLN	GO_RETINAL_BINDING	-0.0304265	0.540481	MF810	Negative
ANLN	GO_U5_SNRNP	0.11438	0.0209989	CC619	Positive	ANLN	GO_ACTIVIN_BINDING	0.0295396	0.552355	MF32	Positive
ANLN	GO_ANCHORED_COMPONENT_OF_PLASMA_MEMBRANE	-0.00750578	0.880007	CC20	Negative	ANLN	GO_G_PROTEIN_COUPLED_CHEMOATTRACTANT_RECEPTOR_ACTIVITY	0.0294858	0.553079	MF319	Positive
ANLN	GO_DESMOSOME	0.390416	4.44e-16	CC163	Positive	ANLN	GO_PHOSPHATIDYLINOSITOL_4_5_BISPHOSPHATE_BINDING	0.0287101	0.563574	MF685	Positive
ANLN	GO_MHC_CLASS_II_PROTEIN_COMPLEX	0.0673558	0.175031	CC330	Positive	ANLN	GO_SULFURIC_ESTER_HYDROLASE_ACTIVITY	0.0286649	0.564187	MF918	Positive
ANLN	GO_PROTEASOME_ACCESSORY_COMPLEX	0.550661	<2E-16	CC478	Positive	ANLN	GO_G_PROTEIN_COUPLED_NEUROTRANSMITTER_RECEPTOR_ACTIVITY	0.0285892	0.565217	MF320	Positive
ANLN	GO_RESPIRATORY_CHAIN_COMPLEX_IV	-0.348311	4.72e-13	CC505	Negative	ANLN	GO_ACETYLCHOLINE_RECEPTOR_ACTIVITY	0.0284305	0.567379	MF17	Positive
ANLN	GO_SARCOLEMMA	0.106208	0.0321818	CC527	Positive	ANLN	GO_ACTIVATING_TRANSCRIPTION_FACTOR_BINDING	0.0283899	0.567933	MF29	Positive
ANLN	GO_WNT_SIGNALOSOME	0.322737	2.55e-11	CC630	Positive	ANLN	GO_INSULIN_RECEPTOR_BINDING	0.0276352	0.578272	MF415	Positive
ANLN	GO_ENDOPEPTIDASE_COMPLEX	0.532779	<2E-16	CC183	Positive	ANLN	GO_BHLH_TRANSCRIPTION_FACTOR_BINDING	-0.0273373	0.582377	MF102	Negative
ANLN	GO_TRAPP_COMPLEX	-0.240465	9.18e-07	CC610	Negative	ANLN	GO_AMINE_BINDING	-0.0272988	0.582909	MF56	Negative
ANLN	GO_SMN_SM_PROTEIN_COMPLEX	0.159909	0.00120803	CC551	Positive	ANLN	GO_PEPTIDASE_ACTIVATOR_ACTIVITY_INVOLVED_IN_APOPTOTIC_PROCESS	0.0272078	0.584166	MF651	Positive
ANLN	GO_MRNA_CLEAVAGE_FACTOR_COMPLEX	0.378971	2.44e-15	CC359	Positive	ANLN	GO_COA_HYDROLASE_ACTIVITY	-0.0269548	0.587668	MF186	Negative
ANLN	GO_LYSOSOMAL_LUMEN	0.0935322	0.0593931	CC316	Positive	ANLN	GO_TRNA_SPECIFIC_RIBONUCLEASE_ACTIVITY	-0.0266077	0.592489	MF983	Negative
ANLN	GO_SARCOPLASM	0.142198	0.00404629	CC528	Positive	ANLN	GO_HEPARAN_SULFATE_PROTEOGLYCAN_BINDING	0.0250368	0.614526	MF364	Positive
ANLN	GO_INTRACILIARY_TRANSPORT_PARTICLE_B	0.0247102	0.619153	CC278	Positive	ANLN	GO_POLY_A_SPECIFIC_RIBONUCLEASE_ACTIVITY	-0.0249402	0.615892	MF720	Negative
ANLN	GO_EXTRINSIC_COMPONENT_OF_PLASMA_MEMBRANE	0.293689	1.54e-09	CC216	Positive	ANLN	GO_STRUCTURAL_CONSTITUENT_OF_EYE_LENS	-0.0241955	0.626474	MF904	Negative
ANLN	GO_DNA_REPAIR_COMPLEX	0.402309	<2E-16	CC169	Positive	ANLN	GO_IONOTROPIC_GLUTAMATE_RECEPTOR_BINDING	0.023206	0.640653	MF434	Positive
ANLN	GO_PROTEASOME_REGULATORY_PARTICLE_BASE_SUBCOMPLEX	0.568292	<2E-16	CC481	Positive	ANLN	GO_PHOSPHATASE_INHIBITOR_ACTIVITY	0.0223322	0.653283	MF669	Positive
ANLN	GO_PHOTORECEPTOR_OUTER_SEGMENT	0.0755512	0.12809	CC437	Positive	ANLN	GO_ACETYLGLUCOSAMINYLTRANSFERASE_ACTIVITY	-0.02228	0.654041	MF20	Negative
ANLN	GO_MYOSIN_COMPLEX	0.113756	0.0217135	CC366	Positive	ANLN	GO_OXIDOREDUCTASE_ACTIVITY_ACTING_ON_THE_CH_NH2_GROUP_OF_DONORS	0.0222218	0.654886	MF637	Positive
ANLN	GO_MCM_COMPLEX	0.683362	<2E-16	CC322	Positive	ANLN	GO_PHOSPHATIDYLINOSITOL_5_PHOSPHATE_BINDING	-0.0219201	0.659275	MF688	Negative
ANLN	GO_CLATHRIN_COAT_OF_ENDOCYTIC_VESICLE	0.360406	6.26e-14	CC102	Positive	ANLN	GO_HYDRO_LYASE_ACTIVITY	-0.0217291	0.662059	MF390	Negative
ANLN	GO_DYNEIN_COMPLEX	0.173919	0.000423824	CC172	Positive	ANLN	GO_FILAMIN_BINDING	-0.02103	0.672291	MF308	Negative
ANLN	GO_ANCHORED_COMPONENT_OF_SYNAPTIC_MEMBRANE	-0.205118	3.05e-05	CC21	Negative	ANLN	GO_CO_SMAD_BINDING	0.0209971	0.672773	MF185	Positive
ANLN	GO_MITOTIC_SPINDLE	0.748346	<2E-16	CC351	Positive	ANLN	GO_DNA_N_GLYCOSYLASE_ACTIVITY	0.0204851	0.680307	MF248	Positive
ANLN	GO_RNA_POLYMERASE_II_TRANSCRIPTION_FACTOR_COMPLEX	0.406406	<2E-16	CC517	Positive	ANLN	GO_OXIDOREDUCTASE_ACTIVITY_ACTING_ON_THE_ALDEHYDE_OR_OXO_GROUP_OF_DONORS_NAD_OR_NADP_AS_ACCEPTOR	0.0204659	0.680591	MF632	Positive
ANLN	GO_PROTEIN_PHOSPHATASE_TYPE_2A_COMPLEX	0.320223	3.71e-11	CC488	Positive	ANLN	GO_R_SMAD_BINDING	0.0204337	0.681066	MF792	Positive
ANLN	GO_CLEAVAGE_FURROW	0.648224	<2E-16	CC110	Positive	ANLN	GO_FATTY_ACYL_COA_BINDING	-0.0204316	0.681097	MF302	Negative
ANLN	GO_ACTIN_FILAMENT_BUNDLE	0.0921702	0.0632115	CC11	Positive	ANLN	GO_MONOCARBOXYLIC_ACID_TRANSMEMBRANE_TRANSPORTER_ACTIVITY	0.0193599	0.696976	MF530	Positive
ANLN	GO_MEIOTIC_SPINDLE	0.559844	<2E-16	CC324	Positive	ANLN	GO_FIBROBLAST_GROWTH_FACTOR_RECEPTOR_BINDING	-0.0188035	0.705273	MF306	Negative
ANLN	GO_PHOSPHATIDYLINOSITOL_3_KINASE_COMPLEX	0.343508	1.03e-12	CC433	Positive	ANLN	GO_CARBOXYPEPTIDASE_ACTIVITY	0.0184314	0.71084	MF147	Positive
ANLN	GO_NUCLEAR_UBIQUITIN_LIGASE_COMPLEX	0.312431	1.15e-10	CC404	Positive	ANLN	GO_NUCLEOSIDE_DIPHOSPHATE_KINASE_ACTIVITY	-0.018199	0.714326	MF585	Negative
ANLN	GO_NUCLEAR_EUCHROMATIN	0.37911	2.22e-15	CC387	Positive	ANLN	GO_METAL_ION_TRANSMEMBRANE_TRANSPORTER_ACTIVITY	0.0180108	0.717154	MF499	Positive
ANLN	GO_INCLUSION_BODY	0.405242	<2E-16	CC265	Positive	ANLN	GO_SYNTAXIN_1_BINDING	-0.0178098	0.720177	MF925	Negative
ANLN	GO_SITE_OF_DOUBLE_STRAND_BREAK	0.672799	<2E-16	CC543	Positive	ANLN	GO_NEUROPEPTIDE_RECEPTOR_BINDING	0.0174676	0.725335	MF562	Positive
ANLN	GO_SPERM_PRINCIPAL_PIECE	0.0877456	0.0770328	CC562	Positive	ANLN	GO_TITIN_BINDING	-0.0161679	0.745035	MF940	Negative
ANLN	GO_NUCLEAR_HETEROCHROMATIN	0.526085	<2E-16	CC389	Positive	ANLN	GO_NARROW_PORE_CHANNEL_ACTIVITY	0.0161458	0.745372	MF557	Positive
ANLN	GO_APICAL_DENDRITE	0.246867	4.58e-07	CC24	Positive	ANLN	GO_NEUROTRANSMITTER_RECEPTOR_ACTIVITY	0.01614	0.745459	MF564	Positive
ANLN	GO_NUCLEAR_REPLICATION_FORK	0.710118	<2E-16	CC400	Positive	ANLN	GO_CARBOXY_LYASE_ACTIVITY	-0.015795	0.750719	MF145	Negative
ANLN	GO_TRANSCRIPTION_FACTOR_COMPLEX	0.398736	<2E-16	CC599	Positive	ANLN	GO_UDP_GALACTOSYLTRANSFERASE_ACTIVITY	-0.0150639	0.761901	MF1002	Negative
ANLN	GO_FILOPODIUM_MEMBRANE	0.247622	4.21e-07	CC225	Positive	ANLN	GO_IMMUNOGLOBULIN_RECEPTOR_BINDING	0.0145516	0.769767	MF406	Positive
ANLN	GO_SPINDLE_POLE_CENTROSOME	0.598572	<2E-16	CC567	Positive	ANLN	GO_SYNTAXIN_BINDING	0.0141768	0.775536	MF926	Positive
ANLN	GO_CELL_CORTEX	0.288609	3.01e-09	CC72	Positive	ANLN	GO_CYCLIN_DEPENDENT_PROTEIN_SERINE_THREONINE_KINASE_INHIBITOR_ACTIVITY	0.0126196	0.799637	MF205	Positive
ANLN	GO_DNA_POLYMERASE_COMPLEX	0.646884	<2E-16	CC168	Positive	ANLN	GO_ENDONUCLEASE_ACTIVITY_ACTIVE_WITH_EITHER_RIBO_OR_DEOXYRIBONUCLEIC_ACIDS_AND_PRODUCING_3_PHOSPHOMONOESTERS	-0.0122286	0.805718	MF271	Negative
ANLN	GO_PERICENTRIOLAR_MATERIAL	0.3999	<2E-16	CC424	Positive	ANLN	GO_PROTEIN_KINASE_A_REGULATORY_SUBUNIT_BINDING	0.0113862	0.818861	MF755	Positive
ANLN	GO_CYTOCHROME_COMPLEX	-0.360411	6.26e-14	CC144	Negative	ANLN	GO_PROTEIN_SERINE_THREONINE_PHOSPHATASE_INHIBITOR_ACTIVITY	-0.0111816	0.822062	MF773	Negative
ANLN	GO_ESC_E_Z_COMPLEX	0.423435	<2E-16	CC197	Positive	ANLN	GO_PHOSPHATIDYLINOSITOL_3_5_BISPHOSPHATE_BINDING	-0.010406	0.834219	MF679	Negative
ANLN	GO_NEURON_PROJECTION_MEMBRANE	0.0770059	0.120887	CC375	Positive	ANLN	GO_DELAYED_RECTIFIER_POTASSIUM_CHANNEL_ACTIVITY	-0.00984295	0.84307	MF228	Negative
ANLN	GO_AXON_INITIAL_SEGMENT	0.269339	3.4e-08	CC38	Positive	ANLN	GO_RNA_POLYMERASE_II_REPRESSING_TRANSCRIPTION_FACTOR_BINDING	0.00978973	0.843908	MF840	Positive
ANLN	GO_GOLGI_ASSOCIATED_VESICLE	0.391981	2.22e-16	CC238	Positive	ANLN	GO_CALCIUM_ACTIVATED_POTASSIUM_CHANNEL_ACTIVITY	-0.0095998	0.846898	MF117	Negative
ANLN	GO_CONTRACTILE_RING	0.749904	<2E-16	CC127	Positive	ANLN	GO_TRANSFERASE_ACTIVITY_TRANSFERRING_ALKYL_OR_ARYL_OTHER_THAN_METHYL_GROUPS	0.00844138	0.865185	MF949	Positive
ANLN	GO_GABA_ERGIC_SYNAPSE	0.0594537	0.231384	CC229	Positive	ANLN	GO_CULLIN_FAMILY_PROTEIN_BINDING	-0.00842741	0.865406	MF196	Negative
ANLN	GO_INTEGRATOR_COMPLEX	0.292377	1.83e-09	CC272	Positive	ANLN	GO_HORMONE_ACTIVITY	0.00733772	0.882674	MF384	Positive
ANLN	GO_T_CELL_RECEPTOR_COMPLEX	0.0709955	0.152809	CC580	Positive	ANLN	GO_STORE_OPERATED_CALCIUM_CHANNEL_ACTIVITY	0.00672576	0.892397	MF902	Positive
ANLN	GO_NADPH_OXIDASE_COMPLEX	-0.0796226	0.108729	CC371	Negative	ANLN	GO_SOLUTE_PROTON_SYMPORTER_ACTIVITY	-0.00525976	0.915752	MF890	Negative
ANLN	GO_CLATHRIN_COATED_ENDOCYTIC_VESICLE_MEMBRANE	0.206462	2.7e-05	CC104	Positive	ANLN	GO_CYCLIC_NUCLEOTIDE_BINDING	-0.00518527	0.916941	MF199	Negative
ANLN	GO_CLATHRIN_COATED_PIT	0.326911	1.37e-11	CC105	Positive	ANLN	GO_METALLOEXOPEPTIDASE_ACTIVITY	0.00431913	0.930777	MF504	Positive
ANLN	GO_RNA_POLYMERASE_II_CORE_COMPLEX	-0.154893	0.0017234	CC515	Negative	ANLN	GO_SUPEROXIDE_GENERATING_NADPH_OXIDASE_ACTIVITY	0.00366143	0.941297	MF923	Positive
ANLN	GO_CIS_GOLGI_NETWORK	0.16816	0.000658356	CC98	Positive	ANLN	GO_NAD_BINDING	0.00341019	0.945319	MF548	Positive
ANLN	GO_DNA_PACKAGING_COMPLEX	0.681872	<2E-16	CC167	Positive	ANLN	GO_STEROID_BINDING	-0.00304334	0.951193	MF895	Negative
ANLN	GO_PHOTORECEPTOR_DISC_MEMBRANE	0.085866	0.0836035	CC435	Positive	ANLN	GO_OXIDOREDUCTASE_ACTIVITY_ACTING_ON_THE_CH_NH2_GROUP_OF_DONORS_OXYGEN_AS_ACCEPTOR	-0.00300597	0.951792	MF638	Negative
ANLN	GO_VACUOLAR_LUMEN	0.223264	5.42e-06	CC622	Positive	ANLN	GO_HYDROLASE_ACTIVITY_ACTING_ON_GLYCOSYL_BONDS	-0.00257874	0.958637	MF398	Negative
ANLN	GO_COLLAGEN_CONTAINING_EXTRACELLULAR_MATRIX	0.081159	0.102052	CC115	Positive	ANLN	GO_EXOPEPTIDASE_ACTIVITY	0.00193669	0.968929	MF289	Positive
ANLN	GO_TRANSCRIPTION_FACTOR_TFIID_COMPLEX	0.411574	<2E-16	CC600	Positive	ANLN	GO_NEUROTRANSMITTER_BINDING	-0.000416609	0.993315	MF563	Negative
ATOH8	GO_MICROTUBULE	-0.413217	<2E-16	CC336	Negative	ANLN	GO_HIGH_VOLTAGE_GATED_CALCIUM_CHANNEL_ACTIVITY	-0.488494	<2E-16	MF370	Negative
ATOH8	GO_COATED_VESICLE_MEMBRANE	-0.401743	<2E-16	CC113	Negative	ANLN	GO_OXIDOREDUCTASE_ACTIVITY_ACTING_ON_NAD_P_H_QUINONE_OR_SIMILAR_COMPOUND_AS_ACCEPTOR	-0.474995	<2E-16	MF625	Negative
ATOH8	GO_CYTOPLASMIC_SIDE_OF_MEMBRANE	-0.310495	1.52e-10	CC150	Negative	ANLN	GO_NADH_DEHYDROGENASE_ACTIVITY	-0.442031	<2E-16	MF550	Negative
ATOH8	GO_FIBRILLAR_COLLAGEN_TRIMER	-0.45031	<2E-16	CC220	Negative	ANLN	GO_OXIDOREDUCTASE_ACTIVITY_ACTING_ON_PAIRED_DONORS_WITH_INCORPORATION_OR_REDUCTION_OF_MOLECULAR_OXYGEN_REDUCED_FLAVIN_OR_FLAVOPROTEIN_AS_ONE_DONOR_AND_INCORPORATION_OF_ONE_ATOM_OF_OXYGEN	-0.438351	<2E-16	MF628	Negative
ATOH8	GO_STAGA_COMPLEX	0.186497	0.000154251	CC570	Positive	ANLN	GO_AROMATASE_ACTIVITY	-0.43465	<2E-16	MF80	Negative
ATOH8	GO_INTRINSIC_COMPONENT_OF_MITOCHONDRIAL_MEMBRANE	0.117753	0.0174755	CC283	Positive	ATOH8	GO_GTPASE_ACTIVITY	-0.399229	<2E-16	MF355	Negative
ATOH8	GO_PERIKARYON	-0.116359	0.0188632	CC425	Negative	ATOH8	GO_G_PROTEIN_ALPHA_SUBUNIT_BINDING	-0.396285	<2E-16	MF315	Negative
ATOH8	GO_MEMBRANE_REGION	-0.314456	8.6e-11	CC327	Negative	ANLN	GO_PROTEIN_DISULFIDE_ISOMERASE_ACTIVITY	0.40014	<2E-16	MF748	Positive
ATOH8	GO_PRESYNAPTIC_ACTIVE_ZONE_MEMBRANE	-0.256654	1.52e-07	CC474	Negative	ANLN	GO_OXIDOREDUCTASE_ACTIVITY_ACTING_ON_CH_OR_CH2_GROUPS	0.401248	<2E-16	MF620	Positive
ATOH8	GO_VESICLE_TETHERING_COMPLEX	0.178868	0.000287051	CC627	Positive	ANLN	GO_PRE_MRNA_INTRONIC_BINDING	0.401675	<2E-16	MF734	Positive
ATOH8	GO_PRESYNAPTIC_MEMBRANE	-0.25615	1.61e-07	CC476	Negative	ANLN	GO_PHOSPHATASE_ACTIVITY	0.402882	<2E-16	MF667	Positive
ATOH8	GO_MIDBODY	-0.38181	1.33e-15	CC343	Negative	ANLN	GO_CELL_ADHESION_MOLECULE_BINDING	0.408967	<2E-16	MF164	Positive
ATOH8	GO_BLOOD_MICROPARTICLE	-0.280204	8.87e-09	CC52	Negative	ANLN	GO_UBIQUITIN_LIKE_MODIFIER_ACTIVATING_ENZYME_ACTIVITY	0.410253	<2E-16	MF991	Positive
ATOH8	GO_ACTIN_FILAMENT	-0.363727	3.55e-14	CC10	Negative	ANLN	GO_ISOMERASE_ACTIVITY	0.413072	<2E-16	MF437	Positive
ATOH8	GO_TRANSPORT_VESICLE_MEMBRANE	-0.204729	3.16e-05	CC608	Negative	ANLN	GO_VIRION_BINDING	0.413349	<2E-16	MF1007	Positive
ATOH8	GO_ESC_E_Z_COMPLEX	-0.16468	0.000853413	CC197	Negative	ANLN	GO_MODIFICATION_DEPENDENT_PROTEIN_BINDING	0.414083	<2E-16	MF524	Positive
ATOH8	GO_NEURON_PROJECTION_MEMBRANE	-0.149298	0.00253067	CC375	Negative	ANLN	GO_PROMOTER_SPECIFIC_CHROMATIN_BINDING	0.416223	<2E-16	MF739	Positive
ATOH8	GO_ASTROCYTE_PROJECTION	-0.302298	4.78e-10	CC31	Negative	ANLN	GO_PHOSPHOPROTEIN_PHOSPHATASE_ACTIVITY	0.420248	<2E-16	MF709	Positive
ATOH8	GO_AXONAL_GROWTH_CONE	-0.184245	0.00018577	CC39	Negative	ANLN	GO_K63_LINKED_POLYUBIQUITIN_MODIFICATION_DEPENDENT_PROTEIN_BINDING	0.421859	<2E-16	MF439	Positive
ATOH8	GO_PARALLEL_FIBER_TO_PURKINJE_CELL_SYNAPSE	-0.212106	1.6e-05	CC419	Negative	ANLN	GO_PROTEIN_FOLDING_CHAPERONE	0.423811	<2E-16	MF750	Positive
ATOH8	GO_MHC_PROTEIN_COMPLEX	-0.233791	1.86e-06	CC331	Negative	ANLN	GO_POLYUBIQUITIN_MODIFICATION_DEPENDENT_PROTEIN_BINDING	0.427425	<2E-16	MF725	Positive
ATOH8	GO_ENDOLYSOSOME	-0.366354	2.26e-14	CC180	Negative	ANLN	GO_EXONUCLEASE_ACTIVITY_ACTIVE_WITH_EITHER_RIBO_OR_DEOXYRIBONUCLEIC_ACIDS_AND_PRODUCING_5_PHOSPHOMONOESTERS	0.434673	<2E-16	MF288	Positive
ATOH8	GO_FICOLIN_1_RICH_GRANULE	-0.397736	<2E-16	CC221	Negative	ANLN	GO_RIBOSOME_BINDING	0.438927	<2E-16	MF823	Positive
ATOH8	GO_DESMOSOME	-0.213958	1.34e-05	CC163	Negative	ANLN	GO_UBIQUITIN_BINDING	0.441405	<2E-16	MF990	Positive
ATOH8	GO_LUMENAL_SIDE_OF_ENDOPLASMIC_RETICULUM_MEMBRANE	-0.222212	6.01e-06	CC314	Negative	ANLN	GO_RNA_STEM_LOOP_BINDING	0.477788	<2E-16	MF845	Positive
ATOH8	GO_MUSCLE_MYOSIN_COMPLEX	-0.181039	0.000241165	CC363	Negative	ANLN	GO_PROTEIN_BINDING_INVOLVED_IN_HETEROTYPIC_CELL_CELL_ADHESION	0.478142	<2E-16	MF745	Positive
ATOH8	GO_SITE_OF_DOUBLE_STRAND_BREAK	-0.361328	5.37e-14	CC543	Negative	ANLN	GO_EXODEOXYRIBONUCLEASE_ACTIVITY	0.478321	<2E-16	MF285	Positive
ATOH8	GO_SPINDLE_MICROTUBULE	-0.380555	1.78e-15	CC564	Negative	ANLN	GO_CADHERIN_BINDING	0.480497	<2E-16	MF114	Positive
ATOH8	GO_TRANS_GOLGI_NETWORK_MEMBRANE	-0.230574	2.59e-06	CC594	Negative	ANLN	GO_OXIDIZED_DNA_BINDING	0.480551	<2E-16	MF615	Positive
ATOH8	GO_MALE_GERM_CELL_NUCLEUS	-0.190411	0.000111092	CC319	Negative	ANLN	GO_LYS63_SPECIFIC_DEUBIQUITINASE_ACTIVITY	0.481861	<2E-16	MF478	Positive
ATOH8	GO_PODOSOME	-0.325688	1.64e-11	CC450	Negative	ANLN	GO_NUCLEOTIDYLTRANSFERASE_ACTIVITY	0.486193	<2E-16	MF596	Positive
ATOH8	GO_ENDOSOME_MEMBRANE	-0.195198	7.37e-05	CC194	Negative	ANLN	GO_MICROTUBULE_PLUS_END_BINDING	0.49165	<2E-16	MF516	Positive
ATOH8	GO_RNA_POLYMERASE_II_CORE_COMPLEX	0.177014	0.000332563	CC515	Positive	ANLN	GO_DISORDERED_DOMAIN_SPECIFIC_BINDING	0.492087	<2E-16	MF237	Positive
ATOH8	GO_CLATHRIN_COATED_VESICLE_MEMBRANE	-0.365428	2.64e-14	CC107	Negative	ANLN	GO_PROTEIN_PHOSPHATASE_2A_BINDING	0.533524	<2E-16	MF764	Positive
ATOH8	GO_SPINDLE_MIDZONE	-0.404769	<2E-16	CC565	Negative	ANLN	GO_TBP_CLASS_PROTEIN_BINDING	0.556606	<2E-16	MF931	Positive
ATOH8	GO_CHYLOMICRON	-0.157037	0.00148242	CC90	Negative	ANLN	GO_GENERAL_TRANSCRIPTION_INITIATION_FACTOR_BINDING	0.556973	<2E-16	MF335	Positive
ATOH8	GO_U1_SNRNP	0.149582	0.00248262	CC613	Positive	ANLN	GO_SEQUENCE_SPECIFIC_MRNA_BINDING	0.559247	<2E-16	MF856	Positive
ATOH8	GO_NADH_DEHYDROGENASE_COMPLEX	0.285265	4.64e-09	CC370	Positive	ANLN	GO_RNA_POLYMERASE_II_CTD_HEPTAPEPTIDE_REPEAT_KINASE_ACTIVITY	0.56581	<2E-16	MF836	Positive
ATOH8	GO_ENDOPLASMIC_RETICULUM_LUMEN	-0.28159	7.44e-09	CC188	Negative	ANLN	GO_ATP_DEPENDENT_MICROTUBULE_MOTOR_ACTIVITY_PLUS_END_DIRECTED	0.576503	<2E-16	MF85	Positive
ATOH8	GO_PRERIBOSOME	-0.164378	0.000872593	CC467	Negative	ANLN	GO_CATALYTIC_ACTIVITY_ACTING_ON_DNA	0.59591	<2E-16	MF156	Positive
ATOH8	GO_PROTEIN_PHOSPHATASE_TYPE_2A_COMPLEX	-0.182381	0.000216325	CC488	Negative	ANLN	GO_DYNEIN_COMPLEX_BINDING	0.601107	<2E-16	MF258	Positive
ATOH8	GO_TERTIARY_GRANULE	-0.362265	4.57e-14	CC585	Negative	ANLN	GO_DNA_POLYMERASE_BINDING	0.621216	<2E-16	MF250	Positive
ATOH8	GO_INTRINSIC_COMPONENT_OF_SYNAPTIC_VESICLE_MEMBRANE	0.230024	2.74e-06	CC294	Positive	ANLN	GO_MISMATCH_REPAIR_COMPLEX_BINDING	0.62701	<2E-16	MF519	Positive
ATOH8	GO_EXCITATORY_SYNAPSE	-0.190071	0.000114335	CC205	Negative	ANLN	GO_NUCLEAR_IMPORT_SIGNAL_RECEPTOR_ACTIVITY	0.652018	<2E-16	MF576	Positive
ATOH8	GO_NUCLEAR_PORE_NUCLEAR_BASKET	-0.314658	8.35e-11	CC398	Negative	ANLN	GO_DNA_REPLICATION_ORIGIN_BINDING	0.671954	<2E-16	MF251	Positive
ATOH8	GO_CLATHRIN_COATED_PIT	-0.298378	8.18e-10	CC105	Negative	ANLN	GO_NUCLEAR_EXPORT_SIGNAL_RECEPTOR_ACTIVITY	0.676139	<2E-16	MF574	Positive
ATOH8	GO_POSTSYNAPTIC_SPECIALIZATION_MEMBRANE	-0.141832	0.00414317	CC463	Negative	ANLN	GO_SINGLE_STRANDED_DNA_HELICASE_ACTIVITY	0.676284	<2E-16	MF868	Positive
ATOH8	GO_CELL_DIVISION_SITE	-0.370649	1.07e-14	CC74	Negative	ANLN	GO_DNA_HELICASE_ACTIVITY	0.687022	<2E-16	MF247	Positive
ATOH8	GO_NPBAF_COMPLEX	0.158557	0.00133079	CC383	Positive	ANLN	GO_NUCLEOCYTOPLASMIC_CARRIER_ACTIVITY	0.699537	<2E-16	MF583	Positive
ATOH8	GO_SPINDLE	-0.392069	2.22e-16	CC563	Negative	ANLN	GO_ATPASE_ACTIVITY	0.705916	<2E-16	MF88	Positive
ATOH8	GO_EXTRINSIC_COMPONENT_OF_CYTOPLASMIC_SIDE_OF_PLASMA_MEMBRANE	-0.343697	9.97e-13	CC211	Negative	ANLN	GO_HISTONE_KINASE_ACTIVITY	0.710072	<2E-16	MF378	Positive
ATOH8	GO_GOLGI_ASSOCIATED_VESICLE_MEMBRANE	-0.379519	2.22e-15	CC239	Negative	ANLN	GO_EPHRIN_RECEPTOR_BINDING	0.39303	2.22e-16	MF279	Positive
ATOH8	GO_ZYMOGEN_GRANULE_MEMBRANE	0.185899	0.000162103	CC633	Positive	ANLN	GO_NADPLUS_BINDING	-0.389592	4.44e-16	MF555	Negative
ATOH8	GO_RIBONUCLEASE_P_COMPLEX	0.0100937	0.839125	CC508	Positive	ATOH8	GO_METALLOENDOPEPTIDASE_ACTIVITY	-0.388672	4.44e-16	MF502	Negative
ATOH8	GO_SPANNING_COMPONENT_OF_MEMBRANE	0.0961601	0.052564	CC556	Positive	ATOH8	GO_COMPLEMENT_BINDING	-0.386869	4.44e-16	MF191	Negative
ATOH8	GO_ENDOPLASMIC_RETICULUM_GOLGI_INTERMEDIATE_COMPARTMENT_MEMBRANE	-0.323361	2.33e-11	CC187	Negative	ANLN	GO_RNA_7_METHYLGUANOSINE_CAP_BINDING	0.389501	4.44e-16	MF824	Positive
ATOH8	GO_COPII_COATED_ER_TO_GOLGI_TRANSPORT_VESICLE	-0.406986	<2E-16	CC132	Negative	ANLN	GO_CALCIUM_DEPENDENT_CYSTEINE_TYPE_ENDOPEPTIDASE_ACTIVITY	-0.385396	8.88e-16	MF121	Negative
ATOH8	GO_INTRINSIC_COMPONENT_OF_SYNAPTIC_MEMBRANE	-0.182822	0.000208701	CC293	Negative	ANLN	GO_TRANSMEMBRANE_RECEPTOR_PROTEIN_SERINE_THREONINE_KINASE_BINDING	-0.380869	1.78e-15	MF975	Negative
ATOH8	GO_CATENIN_COMPLEX	-0.0724158	0.144742	CC63	Negative	ATOH8	GO_PROTEASOME_BINDING	-0.376392	3.77e-15	MF742	Negative
ATOH8	GO_LEADING_EDGE_MEMBRANE	-0.17387	0.000425434	CC311	Negative	ANLN	GO_STRUCTURAL_CONSTITUENT_OF_SYNAPSE	0.376398	3.77e-15	MF911	Positive
ATOH8	GO_P_BODY	-0.0292915	0.555698	CC417	Negative	ATOH8	GO_PROTEASE_BINDING	-0.376182	4e-15	MF741	Negative
ATOH8	GO_CYTOSOLIC_LARGE_RIBOSOMAL_SUBUNIT	0.283847	5.57e-09	CC153	Positive	ANLN	GO_MECHANOSENSITIVE_ION_CHANNEL_ACTIVITY	-0.375339	4.44e-15	MF495	Negative
ATOH8	GO_AXON_INITIAL_SEGMENT	-0.357342	1.06e-13	CC38	Negative	ANLN	GO_ARACHIDONIC_ACID_MONOOXYGENASE_ACTIVITY	-0.374919	4.88e-15	MF77	Negative
ATOH8	GO_MICROBODY_LUMEN	0.32194	2.87e-11	CC333	Positive	ANLN	GO_TRANSLATION_REPRESSOR_ACTIVITY_MRNA_REGULATORY_ELEMENT_BINDING	0.37297	7.11e-15	MF970	Positive
ATOH8	GO_BASAL_PLASMA_MEMBRANE	0.0938363	0.0585672	CC45	Positive	ATOH8	GO_PROTEIN_HETERODIMERIZATION_ACTIVITY	-0.37211	8.22e-15	MF751	Negative
ATOH8	GO_ENDOLYSOSOME_MEMBRANE	-0.338251	2.37e-12	CC181	Negative	ANLN	GO_RAB_GUANYL_NUCLEOTIDE_EXCHANGE_FACTOR_ACTIVITY	0.370881	1.02e-14	MF794	Positive
ATOH8	GO_CYTOSOLIC_SMALL_RIBOSOMAL_SUBUNIT	0.295131	1.27e-09	CC155	Positive	ANLN	GO_NUCLEOTIDE_SUGAR_TRANSMEMBRANE_TRANSPORTER_ACTIVITY	0.367377	1.89e-14	MF594	Positive
ATOH8	GO_NADPH_OXIDASE_COMPLEX	-0.196486	6.59e-05	CC371	Negative	ANLN	GO_NUCLEOSIDE_MONOPHOSPHATE_KINASE_ACTIVITY	0.36723	1.93e-14	MF586	Positive
ATOH8	GO_LOW_DENSITY_LIPOPROTEIN_PARTICLE	-0.305142	3.22e-10	CC313	Negative	ANLN	GO_PEPTIDE_ALPHA_N_ACETYLTRANSFERASE_ACTIVITY	0.366151	2.33e-14	MF653	Positive
ATOH8	GO_CILIARY_BASE	-0.119116	0.0162053	CC92	Negative	ATOH8	GO_HEAT_SHOCK_PROTEIN_BINDING	-0.365742	2.51e-14	MF362	Negative
ATOH8	GO_M_BAND	-0.0190735	0.701241	CC317	Negative	ATOH8	GO_GDP_BINDING	-0.361393	5.31e-14	MF332	Negative
ATOH8	GO_CILIARY_MEMBRANE	0.0509088	0.305574	CC93	Positive	ATOH8	GO_L_AMINO_ACID_TRANSMEMBRANE_TRANSPORTER_ACTIVITY	-0.357271	1.07e-13	MF444	Negative
ATOH8	GO_INTRINSIC_COMPONENT_OF_GOLGI_MEMBRANE	-0.201695	4.15e-05	CC281	Negative	ANLN	GO_BUTYRATE_COA_LIGASE_ACTIVITY	-0.355972	1.33e-13	MF109	Negative
ATOH8	GO_DENDRITE_CYTOPLASM	-0.0591459	0.233812	CC156	Negative	ATOH8	GO_EPIDERMAL_GROWTH_FACTOR_RECEPTOR_BINDING	-0.355859	1.35e-13	MF280	Negative
ATOH8	GO_DENSE_CORE_GRANULE	0.00490826	0.921363	CC162	Positive	ATOH8	GO_PROTEIN_SERINE_THREONINE_KINASE_ACTIVATOR_ACTIVITY	-0.355823	1.36e-13	MF769	Negative
ATOH8	GO_PROTEIN_LIPID_COMPLEX	-0.235366	1.58e-06	CC486	Negative	ANLN	GO_TAT_PROTEIN_BINDING	0.35206	2.55e-13	MF928	Positive
ATOH8	GO_INTRINSIC_COMPONENT_OF_MITOCHONDRIAL_OUTER_MEMBRANE	0.226889	3.77e-06	CC284	Positive	ANLN	GO_DYNACTIN_BINDING	0.349816	3.69e-13	MF257	Positive
ATOH8	GO_INTRINSIC_COMPONENT_OF_ENDOPLASMIC_RETICULUM_MEMBRANE	-0.258626	1.21e-07	CC279	Negative	ANLN	GO_OXIDOREDUCTASE_ACTIVITY_ACTING_ON_A_SULFUR_GROUP_OF_DONORS_NAD_P_AS_ACCEPTOR	0.347281	5.59e-13	MF618	Positive
ATOH8	GO_SPERM_MIDPIECE	0.0948596	0.055857	CC561	Positive	ATOH8	GO_DIVALENT_INORGANIC_CATION_TRANSMEMBRANE_TRANSPORTER_ACTIVITY	-0.347173	5.68e-13	MF239	Negative
ATOH8	GO_90S_PRERIBOSOME	-0.169803	0.00058146	CC1	Negative	ANLN	GO_NEUROTRANSMITTER_RECEPTOR_REGULATOR_ACTIVITY	-0.347159	5.7e-13	MF566	Negative
ATOH8	GO_EXTRINSIC_COMPONENT_OF_MEMBRANE	-0.298508	8.03e-10	CC213	Negative	ANLN	GO_LOW_DENSITY_LIPOPROTEIN_PARTICLE_RECEPTOR_ACTIVITY	0.347119	5.74e-13	MF473	Positive
ATOH8	GO_EXTRINSIC_COMPONENT_OF_SYNAPTIC_MEMBRANE	-0.194962	7.52e-05	CC217	Negative	ANLN	GO_MICROTUBULE_MINUS_END_BINDING	0.347022	5.83e-13	MF514	Positive
ATOH8	GO_SMALL_NUCLEAR_RIBONUCLEOPROTEIN_COMPLEX	-0.0288342	0.561888	CC546	Negative	ATOH8	GO_RAN_GTPASE_BINDING	-0.346436	6.41e-13	MF801	Negative
ATOH8	GO_REGION_OF_CYTOSOL	-0.408838	<2E-16	CC499	Negative	ANLN	GO_GAMMA_CATENIN_BINDING	0.345023	8.06e-13	MF328	Positive
ATOH8	GO_IMMUNOGLOBULIN_COMPLEX_CIRCULATING	-0.23491	1.65e-06	CC263	Negative	ANLN	GO_SMALL_GTPASE_BINDING	0.343318	1.06e-12	MF872	Positive
ATOH8	GO_SAGA_TYPE_COMPLEX	0.0523826	0.291767	CC526	Positive	ATOH8	GO_COLLAGEN_BINDING	-0.342915	1.13e-12	MF190	Negative
ATOH8	GO_COLLAGEN_TRIMER	-0.320714	3.45e-11	CC116	Negative	ANLN	GO_RNA_POLYMERASE_II_GENERAL_TRANSCRIPTION_INITIATION_FACTOR_BINDING	0.342833	1.15e-12	MF838	Positive
ATOH8	GO_CLATHRIN_COAT_OF_ENDOCYTIC_VESICLE	-0.29287	1.71e-09	CC102	Negative	ANLN	GO_ZINC_ION_TRANSMEMBRANE_TRANSPORTER_ACTIVITY	0.338874	2.15e-12	MF1027	Positive
ATOH8	GO_TERMINAL_BOUTON	-0.210829	1.8e-05	CC584	Negative	ANLN	GO_ALPHA_CATENIN_BINDING	0.338095	2.43e-12	MF52	Positive
ATOH8	GO_ANCHORED_COMPONENT_OF_PLASMA_MEMBRANE	-0.258344	1.25e-07	CC20	Negative	ANLN	GO_OXIDOREDUCTASE_ACTIVITY_ACTING_ON_DIPHENOLS_AND_RELATED_SUBSTANCES_AS_DONORS	-0.33785	2.53e-12	MF621	Negative
ATOH8	GO_NEURON_PROJECTION_TERMINUS	-0.305899	2.9e-10	CC376	Negative	ANLN	GO_NUCLEOTIDE_DIPHOSPHATASE_ACTIVITY	-0.337629	2.62e-12	MF592	Negative
ATOH8	GO_AUTOPHAGOSOME_MEMBRANE	-0.0776109	0.117986	CC35	Negative	ATOH8	GO_PROTEIN_LIPID_COMPLEX_BINDING	-0.336787	2.99e-12	MF759	Negative
ATOH8	GO_CELL_LEADING_EDGE	-0.257324	1.41e-07	CC75	Negative	ANLN	GO_2_OXOGLUTARATE_DEPENDENT_DIOXYGENASE_ACTIVITY	0.336471	3.14e-12	MF6	Positive
ATOH8	GO_PROTEIN_DNA_COMPLEX	-0.333802	4.75e-12	CC484	Negative	ANLN	GO_ACYL_COA_DEHYDROGENASE_ACTIVITY	-0.331986	6.29e-12	MF33	Negative
ATOH8	GO_FILAMENTOUS_ACTIN	-0.285657	4.41e-09	CC223	Negative	ANLN	GO_EUKARYOTIC_INITIATION_FACTOR_4E_BINDING	0.331886	6.39e-12	MF283	Positive
ATOH8	GO_CHROMOSOMAL_REGION	-0.354248	1.77e-13	CC87	Negative	ANLN	GO_ACID_THIOL_LIGASE_ACTIVITY	-0.33166	6.62e-12	MF23	Negative
ATOH8	GO_NUCLEOTIDE_EXCISION_REPAIR_COMPLEX	-0.169556	0.000592449	CC406	Negative	ANLN	GO_PHOSPHOLIPASE_A2_ACTIVITY_CONSUMING_1_2_DIPALMITOYLPHOSPHATIDYLCHOLINE	-0.329747	8.87e-12	MF700	Negative
ATOH8	GO_STEREOCILIUM_BUNDLE	0.0601452	0.225992	CC571	Positive	ATOH8	GO_ACTIN_FILAMENT_BINDING	-0.327672	1.22e-11	MF26	Negative
ATOH8	GO_NUCLEAR_PORE	-0.364609	3.06e-14	CC397	Negative	ANLN	GO_MONOCARBOXYLIC_ACID_BINDING	-0.326274	1.5e-11	MF529	Negative
ATOH8	GO_SMN_SM_PROTEIN_COMPLEX	-0.0491243	0.322861	CC551	Negative	ATOH8	GO_KINASE_REGULATOR_ACTIVITY	-0.32446	1.97e-11	MF442	Negative
ATOH8	GO_PLASMA_MEMBRANE_RAFT	-0.262791	7.44e-08	CC441	Negative	ANLN	GO_RNA_POLYMERASE_II_GENERAL_TRANSCRIPTION_INITIATION_FACTOR_ACTIVITY	0.324362	2e-11	MF837	Positive
ATOH8	GO_CELL_PROJECTION_MEMBRANE	-0.144778	0.00341979	CC76	Negative	ANLN	GO_1_PHOSPHATIDYLINOSITOL_3_KINASE_ACTIVITY	0.323184	2.39e-11	MF1	Positive
ATOH8	GO_APICAL_JUNCTION_COMPLEX	-0.0650726	0.190148	CC25	Negative	ATOH8	GO_ACTIN_BINDING	-0.322669	2.58e-11	MF24	Negative
ATOH8	GO_VACUOLAR_PROTON_TRANSPORTING_V_TYPE_ATPASE_COMPLEX	-0.146162	0.00312128	CC624	Negative	ANLN	GO_PYRIMIDINE_NUCLEOTIDE_SUGAR_TRANSMEMBRANE_TRANSPORTER_ACTIVITY	0.322378	2.69e-11	MF787	Positive
ATOH8	GO_PROTON_TRANSPORTING_V_TYPE_ATPASE_V0_DOMAIN	-0.175296	0.000380668	CC493	Negative	ANLN	GO_CADHERIN_BINDING_INVOLVED_IN_CELL_CELL_ADHESION	0.321308	3.16e-11	MF115	Positive
ATOH8	GO_NEUROTRANSMITTER_RECEPTOR_COMPLEX	-0.0463126	0.351363	CC379	Negative	ATOH8	GO_GTPASE_INHIBITOR_ACTIVITY	-0.320787	3.41e-11	MF356	Negative
ATOH8	GO_FILOPODIUM_MEMBRANE	-0.310142	1.59e-10	CC225	Negative	ANLN	GO_ACYL_COA_LIGASE_ACTIVITY	-0.317353	5.65e-11	MF34	Negative
ATOH8	GO_FLEMMING_BODY	-0.253379	2.21e-07	CC227	Negative	ANLN	GO_CARBON_NITROGEN_LYASE_ACTIVITY	0.316478	6.41e-11	MF142	Positive
ATOH8	GO_ORGANELLE_MEMBRANE_CONTACT_SITE	-0.201992	4.04e-05	CC412	Negative	ANLN	GO_CALCIUM_DEPENDENT_PHOSPHOLIPASE_A2_ACTIVITY	-0.316312	6.57e-11	MF122	Negative
ATOH8	GO_CONDENSED_CHROMOSOME_OUTER_KINETOCHORE	-0.428039	<2E-16	CC121	Negative	ANLN	GO_THYROID_HORMONE_RECEPTOR_BINDING	0.312513	1.14e-10	MF939	Positive
ATOH8	GO_PALMITOYLTRANSFERASE_COMPLEX	0.136246	0.00590426	CC418	Positive	ANLN	GO_STRUCTURAL_CONSTITUENT_OF_POSTSYNAPSE	0.312429	1.15e-10	MF908	Positive
ATOH8	GO_SYNAPTIC_MEMBRANE	-0.264671	5.96e-08	CC577	Negative	ANLN	GO_CYCLOSPORIN_A_BINDING	0.310931	1.43e-10	MF207	Positive
ATOH8	GO_CORTICAL_CYTOSKELETON	-0.181599	0.000230483	CC136	Negative	ANLN	GO_PROTEIN_PHOSPHATASE_ACTIVATOR_ACTIVITY	0.310409	1.54e-10	MF765	Positive
ATOH8	GO_EARLY_ENDOSOME	-0.285618	4.44e-09	CC173	Negative	ANLN	GO_FERRIC_IRON_BINDING	0.310189	1.58e-10	MF303	Positive
ATOH8	GO_RUFFLE_MEMBRANE	-0.0790352	0.111371	CC524	Negative	ATOH8	GO_PHOTORECEPTOR_ACTIVITY	-0.309713	1.69e-10	MF716	Negative
ATOH8	GO_U5_SNRNP	-0.001986	0.968139	CC619	Negative	ATOH8	GO_GAMMA_TUBULIN_BINDING	-0.309404	1.77e-10	MF329	Negative
ATOH8	GO_RNA_POLYMERASE_II_HOLOENZYME	-0.0151712	0.760257	CC516	Negative	ATOH8	GO_STEROID_HORMONE_RECEPTOR_ACTIVITY	0.308711	1.95e-10	MF897	Positive
ATOH8	GO_NUCLEAR_INNER_MEMBRANE	-0.1576	0.00142448	CC391	Negative	ANLN	GO_EXOGENOUS_PROTEIN_BINDING	0.308711	1.95e-10	MF286	Positive
ATOH8	GO_NODE_OF_RANVIER	-0.278819	1.06e-08	CC381	Negative	ANLN	GO_PEPTIDE_DISULFIDE_OXIDOREDUCTASE_ACTIVITY	0.308715	1.95e-10	MF656	Positive
ATOH8	GO_PROTEIN_COMPLEX_INVOLVED_IN_CELL_ADHESION	-0.380454	1.78e-15	CC483	Negative	ANLN	GO_SEMAPHORIN_RECEPTOR_BINDING	-0.30737	2.36e-10	MF855	Negative
ATOH8	GO_MITOCHONDRIAL_MATRIX	0.152229	0.0020726	CC347	Positive	ANLN	GO_PEPTIDE_TRANSMEMBRANE_TRANSPORTER_ACTIVITY	0.305471	3.08e-10	MF661	Positive
ATOH8	GO_CUL4_RING_E3_UBIQUITIN_LIGASE_COMPLEX	-0.00180329	0.971068	CC140	Negative	ATOH8	GO_PEPTIDASE_ACTIVATOR_ACTIVITY	-0.305338	3.14e-10	MF650	Negative
ATOH8	GO_PERICENTRIOLAR_MATERIAL	-0.0736876	0.137799	CC424	Negative	ATOH8	GO_ATPASE_ACTIVITY_COUPLED	-0.304208	3.67e-10	MF89	Negative
ATOH8	GO_CYTOSOLIC_RIBOSOME	0.289202	2.78e-09	CC154	Positive	ANLN	GO_HIGH_DENSITY_LIPOPROTEIN_PARTICLE_BINDING	0.303914	3.82e-10	MF369	Positive
ATOH8	GO_PROTON_TRANSPORTING_TWO_SECTOR_ATPASE_COMPLEX	-0.0591073	0.234118	CC489	Negative	ATOH8	GO_LOW_DENSITY_LIPOPROTEIN_PARTICLE_BINDING	-0.303174	4.24e-10	MF472	Negative
ATOH8	GO_INTEGRAL_COMPONENT_OF_PRESYNAPTIC_ACTIVE_ZONE_MEMBRANE	-0.115379	0.0198954	CC270	Negative	ATOH8	GO_PEPTIDASE_REGULATOR_ACTIVITY	-0.303073	4.3e-10	MF652	Negative
ATOH8	GO_TRANSCRIPTION_EXPORT_COMPLEX	0.118204	0.0170457	CC598	Positive	ATOH8	GO_PHOSPHOPROTEIN_BINDING	-0.302314	4.77e-10	MF708	Negative
ATOH8	GO_COMPACT_MYELIN	-0.123807	0.0124313	CC117	Negative	ATOH8	GO_CYTOKINE_BINDING	-0.301177	5.58e-10	MF218	Negative
ATOH8	GO_TIM23_MITOCHONDRIAL_IMPORT_INNER_MEMBRANE_TRANSLOCASE_COMPLEX	0.00689415	0.88972	CC590	Positive	ATOH8	GO_GLYCOSAMINOGLYCAN_BINDING	-0.300301	6.29e-10	MF348	Negative
ATOH8	GO_CONDENSED_NUCLEAR_CHROMOSOME_CENTROMERIC_REGION	-0.361002	5.68e-14	CC123	Negative	ANLN	GO_4_IRON_4_SULFUR_CLUSTER_BINDING	0.299976	6.58e-10	MF12	Positive
ATOH8	GO_AP_TYPE_MEMBRANE_COAT_ADAPTOR_COMPLEX	-0.0438349	0.377756	CC23	Negative	ATOH8	GO_EXTRACELLULAR_MATRIX_STRUCTURAL_CONSTITUENT	-0.299019	7.49e-10	MF294	Negative
ATOH8	GO_SPECIFIC_GRANULE_LUMEN	-0.305763	2.96e-10	CC558	Negative	ANLN	GO_OLIGOSACCHARYL_TRANSFERASE_ACTIVITY	0.298584	7.95e-10	MF603	Positive
ATOH8	GO_INTRINSIC_COMPONENT_OF_PEROXISOMAL_MEMBRANE	0.27372	1.99e-08	CC287	Positive	ANLN	GO_NEUTRAL_AMINO_ACID_TRANSMEMBRANE_TRANSPORTER_ACTIVITY	0.298193	8.38e-10	MF569	Positive
ATOH8	GO_MYELIN_SHEATH	-0.180369	0.000254524	CC364	Negative	ANLN	GO_CASPASE_BINDING	0.297779	8.87e-10	MF152	Positive
ATOH8	GO_CHOLINERGIC_SYNAPSE	-0.0977087	0.0488552	CC84	Negative	ATOH8	GO_CARBOHYDRATE_BINDING	-0.297627	9.05e-10	MF134	Negative
ATOH8	GO_ENDOPLASMIC_RETICULUM_CHAPERONE_COMPLEX	-0.285411	4.56e-09	CC184	Negative	ANLN	GO_3_5_EXODEOXYRIBONUCLEASE_ACTIVITY	0.297355	9.39e-10	MF10	Positive
ATOH8	GO_GAMMA_TUBULIN_COMPLEX	-0.102253	0.0392142	CC231	Negative	ATOH8	GO_MAGNESIUM_ION_BINDING	-0.296631	1.04e-09	MF485	Negative
ATOH8	GO_PLATELET_ALPHA_GRANULE_MEMBRANE	-0.186729	0.000151311	CC445	Negative	ANLN	GO_SMALL_RIBOSOMAL_SUBUNIT_RRNA_BINDING	-0.296453	1.06e-09	MF873	Negative
ATOH8	GO_PCG_PROTEIN_COMPLEX	-0.117325	0.0178924	CC421	Negative	ATOH8	GO_OXIDOREDUCTASE_ACTIVITY_ACTING_ON_THE_CH_CH_GROUP_OF_DONORS	0.293711	1.53e-09	MF633	Positive
ATOH8	GO_MYOFILAMENT	-0.23167	2.31e-06	CC365	Negative	ANLN	GO_BILE_ACID_BINDING	-0.293501	1.58e-09	MF104	Negative
ATOH8	GO_GUANYL_NUCLEOTIDE_EXCHANGE_FACTOR_COMPLEX	-0.271656	2.57e-08	CC246	Negative	ANLN	GO_LIGAND_GATED_SODIUM_CHANNEL_ACTIVITY	-0.293028	1.68e-09	MF455	Negative
ATOH8	GO_PML_BODY	-0.225455	4.36e-06	CC449	Negative	ANLN	GO_SIRNA_BINDING	0.291587	2.03e-09	MF870	Positive
ATOH8	GO_PHOSPHATASE_COMPLEX	-0.22008	7.42e-06	CC432	Negative	ANLN	GO_PEPTIDE_BINDING	0.289931	2.53e-09	MF655	Positive
ATOH8	GO_MISMATCH_REPAIR_COMPLEX	-0.0592688	0.23284	CC344	Negative	ATOH8	GO_HEPARIN_BINDING	-0.289527	2.67e-09	MF366	Negative
ATOH8	GO_CLUSTER_OF_ACTIN_BASED_CELL_PROJECTIONS	-0.0784349	0.114122	CC111	Negative	ATOH8	GO_CYTOSKELETAL_ADAPTOR_ACTIVITY	-0.287398	3.52e-09	MF221	Negative
ATOH8	GO_PERICENTRIC_HETEROCHROMATIN	-0.385382	8.88e-16	CC423	Negative	ANLN	GO_TRANSFERASE_ACTIVITY_TRANSFERRING_PENTOSYL_GROUPS	0.28566	4.41e-09	MF955	Positive
ATOH8	GO_GOLGI_LUMEN	-0.191724	9.94e-05	CC243	Negative	ANLN	GO_MOLECULAR_ADAPTOR_ACTIVITY	0.28565	4.42e-09	MF527	Positive
ATOH8	GO_CYCLIN_DEPENDENT_PROTEIN_KINASE_HOLOENZYME_COMPLEX	-0.362108	4.71e-14	CC143	Negative	ANLN	GO_NUCLEOBASE_CONTAINING_COMPOUND_KINASE_ACTIVITY	0.284845	4.9e-09	MF581	Positive
ATOH8	GO_NUCLEAR_MEMBRANE	-0.33232	5.98e-12	CC394	Negative	ANLN	GO_MRNA_3_UTR_BINDING	0.28436	5.22e-09	MF535	Positive
ATOH8	GO_AXON_CYTOPLASM	-0.0669423	0.177701	CC37	Negative	ATOH8	GO_ATP_DEPENDENT_MICROTUBULE_MOTOR_ACTIVITY	-0.283616	5.74e-09	MF83	Negative
ATOH8	GO_MOTILE_CILIUM	0.101624	0.0404446	CC357	Positive	ATOH8	GO_DNA_SECONDARY_STRUCTURE_BINDING	-0.283504	5.82e-09	MF252	Negative
ATOH8	GO_EXTRINSIC_COMPONENT_OF_PLASMA_MEMBRANE	-0.308833	1.92e-10	CC216	Negative	ANLN	GO_FATTY_ACID_SYNTHASE_ACTIVITY	0.282254	6.83e-09	MF301	Positive
ATOH8	GO_INTRINSIC_COMPONENT_OF_PRESYNAPTIC_ACTIVE_ZONE_MEMBRANE	-0.125895	0.0110172	CC291	Negative	ATOH8	GO_MHC_PROTEIN_COMPLEX_BINDING	-0.282133	6.94e-09	MF511	Negative
ATOH8	GO_DENDRITIC_SHAFT	-0.225387	4.38e-06	CC159	Negative	ANLN	GO_NUCLEAR_HORMONE_RECEPTOR_BINDING	0.281896	7.15e-09	MF575	Positive
ATOH8	GO_OXIDOREDUCTASE_COMPLEX	0.220771	6.93e-06	CC416	Positive	ANLN	GO_PHOSPHATIDYLINOSITOL_3_KINASE_REGULATORY_SUBUNIT_BINDING	0.281804	7.24e-09	MF683	Positive
ATOH8	GO_CELL_TRAILING_EDGE	-0.16418	0.000885457	CC78	Negative	ANLN	GO_CATALYTIC_ACTIVITY_ACTING_ON_RNA	0.281758	7.28e-09	MF157	Positive
ATOH8	GO_HISTONE_METHYLTRANSFERASE_COMPLEX	-0.052738	0.288501	CC256	Negative	ATOH8	GO_PROTEIN_PHOSPHORYLATED_AMINO_ACID_BINDING	-0.281231	7.78e-09	MF767	Negative
ATOH8	GO_CALCIUM_CHANNEL_COMPLEX	0.0553003	0.265681	CC57	Positive	ATOH8	GO_RHO_GTPASE_BINDING	-0.279697	9.45e-09	MF816	Negative
ATOH8	GO_FASCIA_ADHERENS	-0.330272	8.19e-12	CC218	Negative	ANLN	GO_SODIUM_CHANNEL_ACTIVITY	-0.277606	1.23e-08	MF878	Negative
ATOH8	GO_CLATHRIN_COATED_ENDOCYTIC_VESICLE_MEMBRANE	-0.370846	1.02e-14	CC104	Negative	ANLN	GO_OPSONIN_BINDING	0.277015	1.32e-08	MF605	Positive
ATOH8	GO_ENDOCYTIC_VESICLE	-0.33429	4.41e-12	CC177	Negative	ANLN	GO_HYDROLASE_ACTIVITY_ACTING_ON_ETHER_BONDS	-0.276169	1.47e-08	MF397	Negative
ATOH8	GO_DNA_HELICASE_COMPLEX	0.0652255	0.189106	CC166	Positive	ATOH8	GO_CALCIUM_ACTIVATED_POTASSIUM_CHANNEL_ACTIVITY	-0.275638	1.57e-08	MF117	Negative
ATOH8	GO_EXON_EXON_JUNCTION_COMPLEX	-0.0709635	0.152995	CC208	Negative	ATOH8	GO_UNFOLDED_PROTEIN_BINDING	-0.27561	1.58e-08	MF1004	Negative
ATOH8	GO_CHROMOSOME_CENTROMERIC_REGION	-0.39745	<2E-16	CC88	Negative	ANLN	GO_TRANSCRIPTION_COACTIVATOR_ACTIVITY	0.274918	1.72e-08	MF943	Positive
ATOH8	GO_NUCLEAR_OUTER_MEMBRANE	-0.28575	4.36e-09	CC395	Negative	ANLN	GO_ADENYLATE_CYCLASE_BINDING	0.273784	1.98e-08	MF38	Positive
ATOH8	GO_CYTOPLASMIC_STRESS_GRANULE	-0.111932	0.023927	CC151	Negative	ATOH8	GO_DNA_POLYMERASE_ACTIVITY	-0.273296	2.1e-08	MF249	Negative
ATOH8	GO_SERINE_THREONINE_PROTEIN_KINASE_COMPLEX	-0.320292	3.67e-11	CC537	Negative	ANLN	GO_TFIID_CLASS_TRANSCRIPTION_FACTOR_COMPLEX_BINDING	0.271805	2.52e-08	MF935	Positive
ATOH8	GO_STEREOCILIUM_TIP	0.0914079	0.0654353	CC572	Positive	ATOH8	GO_PROTEIN_DEACETYLASE_ACTIVITY	0.271259	2.69e-08	MF747	Positive
ATOH8	GO_SCHMIDT_LANTERMAN_INCISURE	-0.141253	0.00430053	CC532	Negative	ANLN	GO_ALCOHOL_DEHYDROGENASE_NAD_P_PLUS_ACTIVITY	-0.270899	2.82e-08	MF44	Negative
ATOH8	GO_DIHYDROLIPOYL_DEHYDROGENASE_COMPLEX	0.126368	0.0107178	CC164	Positive	ATOH8	GO_IMMUNOGLOBULIN_BINDING	-0.270773	2.86e-08	MF405	Negative
ATOH8	GO_MELANOSOME_MEMBRANE	-0.188296	0.000132763	CC325	Negative	ANLN	GO_REGULATORY_RNA_BINDING	0.270676	2.89e-08	MF808	Positive
ATOH8	GO_INTRINSIC_COMPONENT_OF_POSTSYNAPTIC_MEMBRANE	-0.189538	0.000119596	CC289	Negative	ANLN	GO_RNA_POLYMERASE_II_SPECIFIC_DNA_BINDING_TRANSCRIPTION_FACTOR_BINDING	0.269576	3.31e-08	MF841	Positive
ATOH8	GO_PHOTORECEPTOR_OUTER_SEGMENT_MEMBRANE	0.295363	1.23e-09	CC438	Positive	ANLN	GO_L_GLUTAMATE_TRANSMEMBRANE_TRANSPORTER_ACTIVITY	0.268793	3.64e-08	MF446	Positive
ATOH8	GO_VACUOLAR_MEMBRANE	-0.193751	8.35e-05	CC623	Negative	ANLN	GO_BH_DOMAIN_BINDING	0.267277	4.36e-08	MF101	Positive
ATOH8	GO_ENDOPLASMIC_RETICULUM_QUALITY_CONTROL_COMPARTMENT	-0.111604	0.0243452	CC189	Negative	ATOH8	GO_UBIQUITIN_LIKE_PROTEIN_BINDING	-0.267133	4.44e-08	MF992	Negative
ATOH8	GO_PROTEIN_PHOSPHATASE_TYPE_1_COMPLEX	-0.0973664	0.0496558	CC487	Negative	ATOH8	GO_TAU_PROTEIN_BINDING	-0.267026	4.5e-08	MF929	Negative
ATOH8	GO_INTRINSIC_COMPONENT_OF_MITOCHONDRIAL_INNER_MEMBRANE	0.0201247	0.68563	CC282	Positive	ATOH8	GO_CHANNEL_REGULATOR_ACTIVITY	-0.266804	4.62e-08	MF168	Negative
ATOH8	GO_DENDRITIC_SPINE_MEMBRANE	-0.0297896	0.548995	CC161	Negative	ATOH8	GO_CATION_CATION_ANTIPORTER_ACTIVITY	-0.266112	5.02e-08	MF159	Negative
ATOH8	GO_RIBBON_SYNAPSE	-0.0301214	0.544551	CC507	Negative	ATOH8	GO_CLATHRIN_BINDING	-0.266093	5.03e-08	MF183	Negative
ATOH8	GO_ADA2_GCN5_ADA3_TRANSCRIPTION_ACTIVATOR_COMPLEX	-0.196978	6.31e-05	CC13	Negative	ANLN	GO_MRNA_5_UTR_BINDING	0.265936	5.12e-08	MF536	Positive
ATOH8	GO_CALYX_OF_HELD	-0.295089	1.27e-09	CC58	Negative	ANLN	GO_LONG_CHAIN_FATTY_ACID_TRANSPORTER_ACTIVITY	-0.265635	5.31e-08	MF471	Negative
ATOH8	GO_CLATHRIN_VESICLE_COAT	-0.216578	1.04e-05	CC109	Negative	ANLN	GO_RIBOSOMAL_LARGE_SUBUNIT_BINDING	0.26555	5.37e-08	MF821	Positive
ATOH8	GO_U2_TYPE_SPLICEOSOMAL_COMPLEX	-0.0475046	0.339091	CC617	Negative	ATOH8	GO_ATPASE_REGULATOR_ACTIVITY	-0.2641	6.38e-08	MF94	Negative
ATOH8	GO_CYTOPLASMIC_EXOSOME_RNASE_COMPLEX	-0.0640427	0.197272	CC146	Negative	ATOH8	GO_ANION_CATION_SYMPORTER_ACTIVITY	-0.264064	6.4e-08	MF67	Negative
ATOH8	GO_BASOLATERAL_PLASMA_MEMBRANE	-0.117225	0.0179905	CC47	Negative	ATOH8	GO_OXIDOREDUCTASE_ACTIVITY_ACTING_ON_A_HEME_GROUP_OF_DONORS	0.263952	6.49e-08	MF616	Positive
ATOH8	GO_CLATHRIN_COAT	-0.183298	0.000200748	CC100	Negative	ANLN	GO_INOSITOL_1_4_5_TRISPHOSPHATE_BINDING	0.263934	6.5e-08	MF410	Positive
ATOH8	GO_COSTAMERE	-0.343346	1.05e-12	CC137	Negative	ANLN	GO_ARMADILLO_REPEAT_DOMAIN_BINDING	0.26348	6.86e-08	MF79	Positive
ATOH8	GO_GOLGI_ASSOCIATED_VESICLE	-0.366207	2.31e-14	CC238	Negative	ANLN	GO_ASPARTIC_TYPE_PEPTIDASE_ACTIVITY	-0.263149	7.13e-08	MF82	Negative
ATOH8	GO_HAPTOGLOBIN_HEMOGLOBIN_COMPLEX	0.101247	0.0411967	CC249	Positive	ATOH8	GO_SIGNAL_SEQUENCE_BINDING	-0.261999	8.17e-08	MF865	Negative
ATOH8	GO_CUL4A_RING_E3_UBIQUITIN_LIGASE_COMPLEX	0.0193604	0.696968	CC141	Positive	ATOH8	GO_DISULFIDE_OXIDOREDUCTASE_ACTIVITY	-0.261445	8.72e-08	MF238	Negative
ATOH8	GO_PRESYNAPTIC_CYTOSOL	-0.375411	4.44e-15	CC475	Negative	ANLN	GO_CHLORIDE_CHANNEL_REGULATOR_ACTIVITY	0.260522	9.71e-08	MF176	Positive
ATOH8	GO_DNA_POLYMERASE_COMPLEX	-0.351518	2.79e-13	CC168	Negative	ANLN	GO_PHOSPHATIDYLINOSITOL_3_4_5_TRISPHOSPHATE_BINDING	0.26051	9.73e-08	MF677	Positive
ATOH8	GO_GLYCOPROTEIN_COMPLEX	-0.158242	0.00136103	CC237	Negative	ANLN	GO_GENERAL_TRANSCRIPTION_INITIATION_FACTOR_ACTIVITY	0.259756	1.06e-07	MF334	Positive
ATOH8	GO_GABA_ERGIC_SYNAPSE	-0.101296	0.041097	CC229	Negative	ATOH8	GO_SULFUR_COMPOUND_BINDING	-0.259427	1.1e-07	MF916	Negative
ATOH8	GO_GOLGI_CISTERNA_MEMBRANE	-0.0779832	0.116227	CC242	Negative	ATOH8	GO_RACEMASE_AND_EPIMERASE_ACTIVITY	-0.259372	1.11e-07	MF797	Negative
ATOH8	GO_G_PROTEIN_BETA_GAMMA_SUBUNIT_COMPLEX	-0.391776	2.22e-16	CC228	Negative	ANLN	GO_PRE_MRNA_BINDING	0.25931	1.12e-07	MF733	Positive
ATOH8	GO_MITOCHONDRIAL_RESPIRATORY_CHAIN_COMPLEX_IV	0.288533	3.04e-09	CC349	Positive	ANLN	GO_5S_RRNA_BINDING	-0.258592	1.22e-07	MF14	Negative
ATOH8	GO_AZUROPHIL_GRANULE_LUMEN	-0.356542	1.21e-13	CC42	Negative	ANLN	GO_N_ACETYLTRANSFERASE_ACTIVITY	0.258382	1.25e-07	MF545	Positive
ATOH8	GO_UBIQUITIN_LIGASE_COMPLEX	-0.150487	0.00233481	CC620	Negative	ANLN	GO_LYS48_SPECIFIC_DEUBIQUITINASE_ACTIVITY	0.257714	1.35e-07	MF477	Positive
ATOH8	GO_SPERM_PRINCIPAL_PIECE	-0.0316579	0.52421	CC562	Negative	ATOH8	GO_PHOSPHATE_ION_BINDING	-0.256694	1.51e-07	MF671	Negative
ATOH8	GO_PRERIBOSOME_SMALL_SUBUNIT_PRECURSOR	-0.24268	7.23e-07	CC469	Negative	ANLN	GO_CALCIUM_CHANNEL_INHIBITOR_ACTIVITY	0.255201	1.8e-07	MF119	Positive
ATOH8	GO_TRANSCRIPTION_FACTOR_TFTC_COMPLEX	-0.0379936	0.444622	CC602	Negative	ATOH8	GO_EXTRACELLULAR_MATRIX_BINDING	-0.253468	2.19e-07	MF292	Negative
ATOH8	GO_NUCLEAR_PORE_OUTER_RING	-0.365642	2.55e-14	CC399	Negative	ANLN	GO_RNA_POLYMERASE_ACTIVITY	0.252833	2.35e-07	MF829	Positive
ATOH8	GO_MEIOTIC_SPINDLE	-0.307381	2.36e-10	CC324	Negative	ANLN	GO_EXORIBONUCLEASE_ACTIVITY	0.252552	2.43e-07	MF290	Positive
ATOH8	GO_LATERAL_PLASMA_MEMBRANE	-0.111964	0.023886	CC310	Negative	ATOH8	GO_SULFUR_COMPOUND_TRANSMEMBRANE_TRANSPORTER_ACTIVITY	0.251769	2.65e-07	MF917	Positive
ATOH8	GO_AMPA_GLUTAMATE_RECEPTOR_COMPLEX	-0.0682397	0.169425	CC16	Negative	ATOH8	GO_UBIQUITIN_LIKE_PROTEIN_CONJUGATING_ENZYME_ACTIVITY	-0.251659	2.68e-07	MF993	Negative
ATOH8	GO_SWI_SNF_COMPLEX	0.156471	0.00154283	CC573	Positive	ANLN	GO_DNA_BINDING_TRANSCRIPTION_FACTOR_BINDING	0.250556	3.04e-07	MF243	Positive
ATOH8	GO_CHROMATOID_BODY	-0.292068	1.91e-09	CC85	Negative	ANLN	GO_CALCIUM_TRANSMEMBRANE_TRANSPORTER_ACTIVITY_PHOSPHORYLATIVE_MECHANISM	0.249691	3.35e-07	MF128	Positive
ATOH8	GO_MICROTUBULE_END	-0.438936	<2E-16	CC338	Negative	ANLN	GO_NOTCH_BINDING	0.249272	3.51e-07	MF573	Positive
ATOH8	GO_SMALL_NUCLEOLAR_RIBONUCLEOPROTEIN_COMPLEX	-0.0756896	0.127391	CC547	Negative	ATOH8	GO_ESTROGEN_RECEPTOR_BINDING	-0.249025	3.6e-07	MF282	Negative
ATOH8	GO_POSTSYNAPTIC_ENDOCYTIC_ZONE	-0.175319	0.000379966	CC459	Negative	ANLN	GO_CELL_ADHESION_MEDIATOR_ACTIVITY	0.24687	4.57e-07	MF163	Positive
ATOH8	GO_ACROSOMAL_VESICLE	-0.174847	0.000394252	CC7	Negative	ANLN	GO_SEQUENCE_SPECIFIC_SINGLE_STRANDED_DNA_BINDING	0.246847	4.59e-07	MF857	Positive
ATOH8	GO_SYNAPTIC_CLEFT	-0.00439628	0.929543	CC576	Negative	ATOH8	GO_L_ASCORBIC_ACID_BINDING	-0.245703	5.2e-07	MF445	Negative
ATOH8	GO_CENTRIOLE	-0.255206	1.79e-07	CC80	Negative	ANLN	GO_HYDROLASE_ACTIVITY_ACTING_ON_CARBON_NITROGEN_BUT_NOT_PEPTIDE_BONDS_IN_CYCLIC_AMIDES	0.244286	6.07e-07	MF393	Positive
ATOH8	GO_PLASMA_MEMBRANE_SIGNALING_RECEPTOR_COMPLEX	-0.291465	2.07e-09	CC442	Negative	ANLN	GO_AMINO_ACID_CATION_SYMPORTER_ACTIVITY	0.24414	6.17e-07	MF58	Positive
ATOH8	GO_NUCLEAR_EXOSOME_RNASE_COMPLEX	-0.114364	0.0210169	CC388	Negative	ATOH8	GO_PROTEIN_SELF_ASSOCIATION	-0.244121	6.18e-07	MF768	Negative
ATOH8	GO_POSTSYNAPTIC_SPECIALIZATION_INTRACELLULAR_COMPONENT	-0.211072	1.76e-05	CC462	Negative	ANLN	GO_MYOSIN_II_BINDING	-0.244052	6.23e-07	MF542	Negative
ATOH8	GO_TORC2_COMPLEX	-0.086713	0.0805885	CC592	Negative	ATOH8	GO_RETINOIC_ACID_BINDING	0.243799	6.4e-07	MF811	Positive
ATOH8	GO_MULTIMERIC_RIBONUCLEASE_P_COMPLEX	-0.00537752	0.913873	CC360	Negative	ATOH8	GO_DAMAGED_DNA_BINDING	-0.243004	6.98e-07	MF222	Negative
ATOH8	GO_COATED_VESICLE	-0.34382	9.78e-13	CC112	Negative	ANLN	GO_CORE_PROMOTER_SEQUENCE_SPECIFIC_DNA_BINDING	0.242805	7.13e-07	MF194	Positive
ATOH8	GO_CYTOPLASMIC_SIDE_OF_ENDOPLASMIC_RETICULUM_MEMBRANE	0.23332	1.95e-06	CC149	Positive	ANLN	GO_G_PROTEIN_BETA_SUBUNIT_BINDING	0.241883	7.88e-07	MF317	Positive
ATOH8	GO_TRANSLATION_PREINITIATION_COMPLEX	0.0135839	0.784689	CC606	Positive	ATOH8	GO_SCAVENGER_RECEPTOR_ACTIVITY	-0.241821	7.93e-07	MF851	Negative
ATOH8	GO_CILIARY_ROOTLET	0.0376014	0.449342	CC95	Positive	ATOH8	GO_SEROTONIN_RECEPTOR_ACTIVITY	-0.241547	8.17e-07	MF859	Negative
ATOH8	GO_LAMELLIPODIUM	-0.282731	6.43e-09	CC303	Negative	ANLN	GO_PALMITOYL_PROTEIN_HYDROLASE_ACTIVITY	-0.240175	9.47e-07	MF645	Negative
ATOH8	GO_WNT_SIGNALOSOME	-0.29574	1.17e-09	CC630	Negative	ANLN	GO_AMINO_ACID_SODIUM_SYMPORTER_ACTIVITY	0.23796	1.2e-06	MF59	Positive
ATOH8	GO_PHAGOCYTIC_CUP	-0.235272	1.59e-06	CC427	Negative	ANLN	GO_RECEPTOR_TYROSINE_KINASE_BINDING	0.237551	1.25e-06	MF807	Positive
ATOH8	GO_AGGRESOME	-0.232269	2.18e-06	CC15	Negative	ANLN	GO_MEDIUM_CHAIN_FATTY_ACID_COA_LIGASE_ACTIVITY	-0.236327	1.42e-06	MF496	Negative
ATOH8	GO_ROUGH_ENDOPLASMIC_RETICULUM	-0.256369	1.57e-07	CC521	Negative	ANLN	GO_SULFURTRANSFERASE_ACTIVITY	-0.236273	1.43e-06	MF919	Negative
ATOH8	GO_SITE_OF_DNA_DAMAGE	-0.36186	4.88e-14	CC542	Negative	ANLN	GO_VOLTAGE_GATED_CALCIUM_CHANNEL_ACTIVITY	-0.235673	1.53e-06	MF1013	Negative
ATOH8	GO_TRANS_GOLGI_NETWORK	-0.229145	3e-06	CC593	Negative	ANLN	GO_ACETYLCHOLINE_RECEPTOR_BINDING	-0.23495	1.65e-06	MF18	Negative
ATOH8	GO_ACTOMYOSIN	-0.206081	2.79e-05	CC12	Negative	ANLN	GO_DYNEIN_INTERMEDIATE_CHAIN_BINDING	0.234046	1.81e-06	MF260	Positive
ATOH8	GO_SMOOTH_ENDOPLASMIC_RETICULUM	-0.0355418	0.474578	CC552	Negative	ATOH8	GO_NITRIC_OXIDE_SYNTHASE_BINDING	-0.231712	2.3e-06	MF571	Negative
ATOH8	GO_POSTSYNAPTIC_DENSITY_MEMBRANE	-0.0916581	0.0646986	CC458	Negative	ATOH8	GO_TRANSMITTER_GATED_CHANNEL_ACTIVITY	-0.231328	2.4e-06	MF978	Negative
ATOH8	GO_RECYCLING_ENDOSOME_MEMBRANE	-0.0348543	0.483173	CC498	Negative	ATOH8	GO_PROTEIN_C_TERMINUS_BINDING	-0.230284	2.67e-06	MF746	Negative
ATOH8	GO_CUL3_RING_UBIQUITIN_LIGASE_COMPLEX	0.0170769	0.731238	CC139	Positive	ATOH8	GO_HORMONE_ACTIVITY	-0.230123	2.71e-06	MF384	Negative
ATOH8	GO_INTRINSIC_COMPONENT_OF_EXTERNAL_SIDE_OF_PLASMA_MEMBRANE	-0.317917	5.2e-11	CC280	Negative	ANLN	GO_PHOSPHOTYROSINE_RESIDUE_BINDING	0.230133	2.71e-06	MF715	Positive
ATOH8	GO_PERINUCLEAR_ENDOPLASMIC_RETICULUM	0.0340047	0.493908	CC426	Positive	ATOH8	GO_THIOLESTER_HYDROLASE_ACTIVITY	0.229785	2.81e-06	MF937	Positive
ATOH8	GO_VOLTAGE_GATED_CALCIUM_CHANNEL_COMPLEX	0.137376	0.00550155	CC628	Positive	ANLN	GO_LIGAND_ACTIVATED_TRANSCRIPTION_FACTOR_ACTIVITY	-0.229076	3.02e-06	MF450	Negative
ATOH8	GO_NUCLEAR_MATRIX	-0.249205	3.53e-07	CC393	Negative	ANLN	GO_NUCLEAR_RECEPTOR_BINDING	0.226817	3.8e-06	MF578	Positive
ATOH8	GO_BASEMENT_MEMBRANE	-0.273322	2.09e-08	CC46	Negative	ANLN	GO_PROTON_CHANNEL_ACTIVITY	-0.226633	3.87e-06	MF781	Negative
ATOH8	GO_MULTIVESICULAR_BODY	-0.0264155	0.595166	CC361	Negative	ATOH8	GO_FATTY_ACID_BINDING	0.226306	4e-06	MF298	Positive
ATOH8	GO_PRERIBOSOME_LARGE_SUBUNIT_PRECURSOR	-0.179768	0.000267105	CC468	Negative	ANLN	GO_CERAMIDE_BINDING	0.225807	4.2e-06	MF165	Positive
ATOH8	GO_POSTSYNAPTIC_CYTOSOL	-0.423277	<2E-16	CC456	Negative	ANLN	GO_GAP_JUNCTION_CHANNEL_ACTIVITY	0.225714	4.24e-06	MF330	Positive
ATOH8	GO_FILOPODIUM_TIP	-0.11284	0.0228017	CC226	Negative	ATOH8	GO_ENDODEOXYRIBONUCLEASE_ACTIVITY_PRODUCING_5_PHOSPHOMONOESTERS	-0.225274	4.43e-06	MF269	Negative
ATOH8	GO_MITOCHONDRIAL_SMALL_RIBOSOMAL_SUBUNIT	-0.00478258	0.923371	CC350	Negative	ATOH8	GO_ALCOHOL_BINDING	-0.224961	4.58e-06	MF43	Negative
ATOH8	GO_LIPID_DROPLET	0.0584977	0.238986	CC312	Positive	ATOH8	GO_WNT_PROTEIN_BINDING	-0.223573	5.26e-06	MF1024	Negative
ATOH8	GO_CAMP_DEPENDENT_PROTEIN_KINASE_COMPLEX	-0.092164	0.0632294	CC59	Negative	ATOH8	GO_PROTEIN_TYROSINE_KINASE_ACTIVITY	-0.221088	6.72e-06	MF776	Negative
ATOH8	GO_ANCHORED_COMPONENT_OF_SYNAPTIC_VESICLE_MEMBRANE	0.263679	6.7e-08	CC22	Positive	ANLN	GO_ANTIOXIDANT_ACTIVITY	-0.220322	7.24e-06	MF74	Negative
ATOH8	GO_PROTEIN_KINASE_COMPLEX	-0.262556	7.65e-08	CC485	Negative	ANLN	GO_PROTEIN_ARGININE_N_METHYLTRANSFERASE_ACTIVITY	0.220101	7.4e-06	MF744	Positive
ATOH8	GO_ESCRT_III_COMPLEX	0.324437	1.98e-11	CC200	Positive	ANLN	GO_HISTONE_METHYLTRANSFERASE_ACTIVITY	0.219086	8.17e-06	MF380	Positive
ATOH8	GO_FIBRILLAR_CENTER	-0.0401998	0.418611	CC219	Negative	ATOH8	GO_LYSOPHOSPHOLIPASE_ACTIVITY	0.219081	8.18e-06	MF481	Positive
ATOH8	GO_INTRINSIC_COMPONENT_OF_NUCLEAR_INNER_MEMBRANE	-0.159609	0.00123437	CC285	Negative	ANLN	GO_MOLECULAR_CARRIER_ACTIVITY	-0.218579	8.59e-06	MF528	Negative
ATOH8	GO_A_BAND	-0.0879257	0.0764259	CC4	Negative	ATOH8	GO_OXIDOREDUCTASE_ACTIVITY_ACTING_ON_NAD_P_H	0.217895	9.17e-06	MF622	Positive
ATOH8	GO_MEDIATOR_COMPLEX	-0.140781	0.00443287	CC323	Negative	ANLN	GO_ION_GATED_CHANNEL_ACTIVITY	-0.217644	9.4e-06	MF431	Negative
ATOH8	GO_SMALL_SUBUNIT_PROCESSOME	-0.129788	0.00875646	CC549	Negative	ATOH8	GO_5_3_EXONUCLEASE_ACTIVITY	-0.217109	9.9e-06	MF13	Negative
ATOH8	GO_EXOCYST	0.197298	6.13e-05	CC206	Positive	ANLN	GO_RECEPTOR_ANTAGONIST_ACTIVITY	-0.214401	1.28e-05	MF803	Negative
ATOH8	GO_PHAGOCYTIC_VESICLE	-0.323753	2.19e-11	CC428	Negative	ANLN	GO_PROTEIN_TYROSINE_KINASE_ACTIVATOR_ACTIVITY	0.214431	1.28e-05	MF775	Positive
ATOH8	GO_ADHERENS_JUNCTION	-0.0937065	0.0589184	CC14	Negative	ATOH8	GO_PROTEIN_PHOSPHATASE_BINDING	-0.213978	1.34e-05	MF766	Negative
ATOH8	GO_MAIN_AXON	-0.293404	1.6e-09	CC318	Negative	ANLN	GO_CARBOHYDRATE_PROTON_SYMPORTER_ACTIVITY	-0.213307	1.42e-05	MF138	Negative
ATOH8	GO_ACTIN_FILAMENT_BUNDLE	-0.204114	3.34e-05	CC11	Negative	ANLN	GO_HISTONE_METHYLTRANSFERASE_ACTIVITY_H3_K9_SPECIFIC	0.211887	1.63e-05	MF382	Positive
ATOH8	GO_PEPTIDASE_COMPLEX	-0.348259	4.77e-13	CC422	Negative	ANLN	GO_PHOSPHATASE_REGULATOR_ACTIVITY	0.211761	1.65e-05	MF670	Positive
ATOH8	GO_INTRACILIARY_TRANSPORT_PARTICLE_B	0.0505934	0.308584	CC278	Positive	ATOH8	GO_ACETYLCHOLINE_RECEPTOR_ACTIVITY	-0.211154	1.74e-05	MF17	Negative
ATOH8	GO_HISTONE_DEACETYLASE_COMPLEX	0.190447	0.000110753	CC255	Positive	ANLN	GO_ENDOPEPTIDASE_REGULATOR_ACTIVITY	0.210964	1.78e-05	MF274	Positive
ATOH8	GO_CYTOPLASMIC_REGION	-0.203209	3.63e-05	CC148	Negative	ANLN	GO_NUCLEOSIDE_TRIPHOSPHATE_DIPHOSPHATASE_ACTIVITY	0.210352	1.88e-05	MF588	Positive
ATOH8	GO_CELL_BODY_MEMBRANE	-0.0562978	0.257143	CC69	Negative	ATOH8	GO_LIPOPROTEIN_PARTICLE_RECEPTOR_BINDING	-0.210122	1.92e-05	MF468	Negative
ATOH8	GO_NON_MOTILE_CILIUM	-0.0970682	0.0503619	CC382	Negative	ATOH8	GO_ACYLGLYCEROL_O_ACYLTRANSFERASE_ACTIVITY	0.208704	2.19e-05	MF35	Positive
ATOH8	GO_OLIGOSACCHARYLTRANSFERASE_COMPLEX	-0.0740629	0.1358	CC408	Negative	ATOH8	GO_ADENYLYLTRANSFERASE_ACTIVITY	-0.208275	2.28e-05	MF39	Negative
ATOH8	GO_TRANSFERASE_COMPLEX_TRANSFERRING_PHOSPHORUS_CONTAINING_GROUPS	-0.291488	2.06e-09	CC605	Negative	ANLN	GO_CARBOHYDRATE_CATION_SYMPORTER_ACTIVITY	-0.208223	2.29e-05	MF135	Negative
ATOH8	GO_RIBOSOMAL_SUBUNIT	0.205012	3.08e-05	CC510	Positive	ANLN	GO_SPHINGOLIPID_BINDING	0.208165	2.3e-05	MF893	Positive
ATOH8	GO_KERATIN_FILAMENT	0.0199452	0.688287	CC298	Positive	ATOH8	GO_PHOSPHOLIPASE_BINDING	-0.20745	2.46e-05	MF702	Negative
ATOH8	GO_GAP_JUNCTION	-0.132407	0.00747799	CC232	Negative	ANLN	GO_SOLUTE_ANION_ANTIPORTER_ACTIVITY	-0.207347	2.49e-05	MF886	Negative
ATOH8	GO_HOST_CELL_CYTOPLASM	-0.274074	1.91e-08	CC258	Negative	ANLN	GO_BASIC_AMINO_ACID_TRANSMEMBRANE_TRANSPORTER_ACTIVITY	0.206314	2.73e-05	MF97	Positive
ATOH8	GO_GLIAL_CELL_PROJECTION	-0.282037	7.02e-09	CC235	Negative	ANLN	GO_PROTON_EXPORTING_ATPASE_ACTIVITY_PHOSPHORYLATIVE_MECHANISM	0.20627	2.74e-05	MF782	Positive
ATOH8	GO_GERM_CELL_NUCLEUS	-0.226338	3.99e-06	CC234	Negative	ANLN	GO_PHOSPHATIDYLINOSITOL_3_KINASE_REGULATOR_ACTIVITY	0.20482	3.13e-05	MF682	Positive
ATOH8	GO_MICROVILLUS_MEMBRANE	-0.131344	0.00797508	CC342	Negative	ANLN	GO_RNA_BINDING_INVOLVED_IN_POSTTRANSCRIPTIONAL_GENE_SILENCING	-0.204803	3.14e-05	MF825	Negative
ATOH8	GO_CLATHRIN_COATED_VESICLE	-0.273247	2.11e-08	CC106	Negative	ANLN	GO_OUTWARD_RECTIFIER_POTASSIUM_CHANNEL_ACTIVITY	-0.204614	3.19e-05	MF613	Negative
ATOH8	GO_PROTEASOME_CORE_COMPLEX	-0.263765	6.63e-08	CC479	Negative	ANLN	GO_AMP_BINDING	-0.204185	3.32e-05	MF64	Negative
ATOH8	GO_SNARE_COMPLEX	-0.267225	4.39e-08	CC553	Negative	ANLN	GO_CATION_CHLORIDE_SYMPORTER_ACTIVITY	0.204195	3.32e-05	MF161	Positive
ATOH8	GO_SODIUM_POTASSIUM_EXCHANGING_ATPASE_COMPLEX	0.0860326	0.0830035	CC555	Positive	ATOH8	GO_DIACYLGLYCEROL_KINASE_ACTIVITY	0.204139	3.33e-05	MF232	Positive
ATOH8	GO_COPII_VESICLE_COAT	-0.245424	5.36e-07	CC133	Negative	ANLN	GO_SEMAPHORIN_RECEPTOR_ACTIVITY	0.203847	3.42e-05	MF854	Positive
ATOH8	GO_SPECIFIC_GRANULE	-0.318457	4.8e-11	CC557	Negative	ANLN	GO_TRANSCRIPTION_COREPRESSOR_BINDING	0.203656	3.48e-05	MF947	Positive
ATOH8	GO_HOPS_COMPLEX	0.124301	0.0120832	CC257	Positive	ATOH8	GO_ACETYLGALACTOSAMINYLTRANSFERASE_ACTIVITY	-0.203383	3.57e-05	MF19	Negative
ATOH8	GO_ORGANELLE_INNER_MEMBRANE	0.132416	0.00747375	CC411	Positive	ANLN	GO_CARGO_ADAPTOR_ACTIVITY	0.202903	3.73e-05	MF150	Positive
ATOH8	GO_CONDENSED_NUCLEAR_CHROMOSOME	-0.351808	2.66e-13	CC122	Negative	ANLN	GO_CYSTEINE_TYPE_ENDOPEPTIDASE_INHIBITOR_ACTIVITY	0.202647	3.81e-05	MF212	Positive
ATOH8	GO_I_BAND	-0.24351	6.61e-07	CC261	Negative	ANLN	GO_VINCULIN_BINDING	0.202504	3.86e-05	MF1006	Positive
ATOH8	GO_SPLICEOSOMAL_COMPLEX	-0.0198112	0.690272	CC568	Negative	ATOH8	GO_STRUCTURAL_CONSTITUENT_OF_EYE_LENS	-0.201495	4.23e-05	MF904	Negative
ATOH8	GO_MITOTIC_SPINDLE_MIDZONE	-0.252371	2.48e-07	CC352	Negative	ANLN	GO_RACEMASE_AND_EPIMERASE_ACTIVITY_ACTING_ON_CARBOHYDRATES_AND_DERIVATIVES	0.20138	4.27e-05	MF798	Positive
ATOH8	GO_RNAI_EFFECTOR_COMPLEX	-0.0322023	0.517096	CC520	Negative	ATOH8	GO_METALLOCARBOXYPEPTIDASE_ACTIVITY	-0.20088	4.47e-05	MF501	Negative
ATOH8	GO_TETRASPANIN_ENRICHED_MICRODOMAIN	-0.0391627	0.430726	CC588	Negative	ATOH8	GO_NUCLEOSIDE_DIPHOSPHATASE_ACTIVITY	0.19993	4.86e-05	MF584	Positive
ATOH8	GO_ACTIN_CYTOSKELETON	-0.294284	1.42e-09	CC9	Negative	ANLN	GO_OXYGEN_CARRIER_ACTIVITY	-0.199653	4.98e-05	MF642	Negative
ATOH8	GO_MCM_COMPLEX	-0.325007	1.82e-11	CC322	Negative	ANLN	GO_CYSTEINE_TYPE_ENDOPEPTIDASE_REGULATOR_ACTIVITY_INVOLVED_IN_APOPTOTIC_PROCESS	0.199548	5.03e-05	MF214	Positive
ATOH8	GO_DENDRITIC_SPINE_HEAD	0.0246636	0.619814	CC160	Positive	ATOH8	GO_SINGLE_STRANDED_RNA_BINDING	-0.198402	5.57e-05	MF869	Negative
ATOH8	GO_METHYLOSOME	-0.0017367	0.972136	CC328	Negative	ATOH8	GO_INTRONIC_TRANSCRIPTION_REGULATORY_REGION_DNA_BINDING	0.197945	5.8e-05	MF427	Positive
ATOH8	GO_DENDRITE_TERMINUS	-0.0588186	0.236415	CC158	Negative	ATOH8	GO_TRANSMEMBRANE_RECEPTOR_PROTEIN_TYROSINE_KINASE_ACTIVITY	-0.197156	6.21e-05	MF976	Negative
ATOH8	GO_TRANS_GOLGI_NETWORK_TRANSPORT_VESICLE	-0.114437	0.0209347	CC595	Negative	ATOH8	GO_CYCLASE_ACTIVITY	-0.196981	6.31e-05	MF198	Negative
ATOH8	GO_CIS_GOLGI_NETWORK	-0.0574607	0.247429	CC98	Negative	ATOH8	GO_HYDRO_LYASE_ACTIVITY	0.196979	6.31e-05	MF390	Positive
ATOH8	GO_CELL_CELL_CONTACT_ZONE	-0.321714	2.97e-11	CC70	Negative	ANLN	GO_RNA_POLYMERASE_III_REGULATORY_REGION_DNA_BINDING	0.196418	6.63e-05	MF844	Positive
ATOH8	GO_TERTIARY_GRANULE_LUMEN	-0.235538	1.55e-06	CC586	Negative	ANLN	GO_GTPASE_REGULATOR_ACTIVITY	0.196129	6.8e-05	MF357	Positive
ATOH8	GO_CILIARY_PLASM	-0.13807	0.00526651	CC94	Negative	ANLN	GO_METAL_ION_PROTON_ANTIPORTER_ACTIVITY	0.195793	7e-05	MF498	Positive
ATOH8	GO_HETEROCHROMATIN	-0.289268	2.76e-09	CC251	Negative	ANLN	GO_PROFILIN_BINDING	0.1954	7.24e-05	MF737	Positive
ATOH8	GO_COPI_VESICLE_COAT	-0.325246	1.75e-11	CC131	Negative	ANLN	GO_CALCIUM_DEPENDENT_PHOSPHOLIPID_BINDING	0.190769	0.000107766	MF123	Positive
ATOH8	GO_HOST_CELLULAR_COMPONENT	-0.381082	1.78e-15	CC260	Negative	ANLN	GO_RECEPTOR_INHIBITOR_ACTIVITY	-0.190547	0.000109813	MF804	Negative
ATOH8	GO_U4_SNRNP	0.11668	0.0185352	CC618	Positive	ATOH8	GO_QUINONE_BINDING	0.190268	0.000112438	MF791	Positive
ATOH8	GO_SCF_UBIQUITIN_LIGASE_COMPLEX	-0.111755	0.0241524	CC530	Negative	ATOH8	GO_HISTONE_BINDING	-0.189043	0.000124685	MF373	Negative
ATOH8	GO_RESPIRATORY_CHAIN_COMPLEX_III	0.275149	1.67e-08	CC504	Positive	ANLN	GO_SULFATE_TRANSMEMBRANE_TRANSPORTER_ACTIVITY	-0.188836	0.000126878	MF914	Negative
ATOH8	GO_OUTER_MEMBRANE	0.00227968	0.96343	CC414	Positive	ATOH8	GO_GLUTAMATE_RECEPTOR_ACTIVITY	-0.187133	0.000146309	MF342	Negative
ATOH8	GO_COMPLEX_OF_COLLAGEN_TRIMERS	-0.391034	2.22e-16	CC118	Negative	ANLN	GO_G_PROTEIN_COUPLED_RECEPTOR_BINDING	0.187054	0.000147272	MF322	Positive
ATOH8	GO_GOLGI_CIS_CISTERNA	0.266747	4.65e-08	CC240	Positive	ANLN	GO_SODIUM_CHLORIDE_SYMPORTER_ACTIVITY	0.185497	0.000167577	MF880	Positive
ATOH8	GO_EXTERNAL_SIDE_OF_PLASMA_MEMBRANE	-0.298847	7.67e-10	CC210	Negative	ANLN	GO_PROSTANOID_RECEPTOR_ACTIVITY	-0.183968	0.000190045	MF740	Negative
ATOH8	GO_JUXTAPARANODE_REGION_OF_AXON	-0.175895	0.000363205	CC297	Negative	ANLN	GO_G_RICH_STRAND_TELOMERIC_DNA_BINDING	0.182119	0.000220971	MF323	Positive
ATOH8	GO_H4_HISTONE_ACETYLTRANSFERASE_COMPLEX	-0.000975688	0.984344	CC248	Negative	ATOH8	GO_STEROL_BINDING	-0.181821	0.000226382	MF900	Negative
ATOH8	GO_LARGE_RIBOSOMAL_SUBUNIT	0.196022	6.86e-05	CC306	Positive	ANLN	GO_CARD_DOMAIN_BINDING	0.181458	0.00023313	MF148	Positive
ATOH8	GO_POLE_PLASM	-0.233894	1.84e-06	CC451	Negative	ANLN	GO_PEPTIDYL_PROLINE_DIOXYGENASE_ACTIVITY	0.180956	0.000242775	MF664	Positive
ATOH8	GO_PHAGOPHORE_ASSEMBLY_SITE	-0.0420961	0.396984	CC430	Negative	ATOH8	GO_SOLUTE_PROTON_ANTIPORTER_ACTIVITY	-0.180794	0.000245967	MF889	Negative
ATOH8	GO_RESPIRATORY_CHAIN_COMPLEX	0.277199	1.29e-08	CC503	Positive	ANLN	GO_MAGNESIUM_ION_TRANSMEMBRANE_TRANSPORTER_ACTIVITY	0.180395	0.000254001	MF486	Positive
ATOH8	GO_ACROSOMAL_MEMBRANE	-0.108383	0.0287961	CC6	Negative	ATOH8	GO_STEROID_DEHYDROGENASE_ACTIVITY	0.180266	0.000256639	MF896	Positive
ATOH8	GO_EARLY_ENDOSOME_MEMBRANE	-0.220519	7.11e-06	CC174	Negative	ANLN	GO_PATTERN_RECOGNITION_RECEPTOR_ACTIVITY	0.180245	0.000257076	MF648	Positive
ATOH8	GO_VOLTAGE_GATED_SODIUM_CHANNEL_COMPLEX	-0.000556874	0.991064	CC629	Negative	ATOH8	GO_PHOSPHATIDYLINOSITOL_BINDING	-0.180097	0.000260155	MF689	Negative
ATOH8	GO_PRC1_COMPLEX	0.0883549	0.0749951	CC465	Positive	ATOH8	GO_ACID_AMINO_ACID_LIGASE_ACTIVITY	0.179314	0.000277009	MF22	Positive
ATOH8	GO_TRIGLYCERIDE_RICH_PLASMA_LIPOPROTEIN_PARTICLE	-0.111161	0.0249195	CC612	Negative	ATOH8	GO_DNA_BINDING_BENDING	-0.178733	0.00029015	MF241	Negative
ATOH8	GO_ACTIN_BASED_CELL_PROJECTION	-0.267934	4.03e-08	CC8	Negative	ANLN	GO_ANION_SODIUM_SYMPORTER_ACTIVITY	0.178408	0.000297768	MF69	Positive
ATOH8	GO_ENDOPLASMIC_RETICULUM_GOLGI_INTERMEDIATE_COMPARTMENT	-0.360799	5.86e-14	CC186	Negative	ANLN	GO_OXIDOREDUCTASE_ACTIVITY_ACTING_ON_PAIRED_DONORS_WITH_INCORPORATION_OR_REDUCTION_OF_MOLECULAR_OXYGEN_NAD_P_H_AS_ONE_DONOR_AND_INCORPORATION_OF_ONE_ATOM_OF_OXYGEN	-0.177669	0.000315764	MF627	Negative
ATOH8	GO_CLATHRIN_ADAPTOR_COMPLEX	0.0491119	0.322984	CC99	Positive	ATOH8	GO_ENDONUCLEASE_ACTIVITY_ACTIVE_WITH_EITHER_RIBO_OR_DEOXYRIBONUCLEIC_ACIDS_AND_PRODUCING_5_PHOSPHOMONOESTERS	-0.177119	0.000329828	MF272	Negative
ATOH8	GO_POSTSYNAPTIC_ENDOSOME	0.347284	5.58e-13	CC460	Positive	ANLN	GO_OXIDOREDUCTASE_ACTIVITY_ACTING_ON_THE_CH_NH_GROUP_OF_DONORS	0.176868	0.00033641	MF635	Positive
ATOH8	GO_POTASSIUM_CHANNEL_COMPLEX	-0.208676	2.2e-05	CC464	Negative	ANLN	GO_DYNEIN_LIGHT_CHAIN_BINDING	0.176164	0.000355601	MF261	Positive
ATOH8	GO_CLATHRIN_SCULPTED_VESICLE	-0.1489	0.00259954	CC108	Negative	ANLN	GO_DNA_BINDING_TRANSCRIPTION_REPRESSOR_ACTIVITY	0.175331	0.000379624	MF244	Positive
ATOH8	GO_RECYCLING_ENDOSOME	-0.125391	0.011345	CC497	Negative	ATOH8	GO_UBIQUITIN_LIKE_PROTEIN_TRANSFERASE_ACTIVITY	-0.174667	0.00039985	MF998	Negative
ATOH8	GO_SARCOPLASMIC_RETICULUM_MEMBRANE	-0.204533	3.22e-05	CC529	Negative	ANLN	GO_1_PHOSPHATIDYLINOSITOL_3_KINASE_REGULATOR_ACTIVITY	0.174299	0.000411468	MF2	Positive
ATOH8	GO_PORE_COMPLEX	0.0307966	0.535565	CC454	Positive	ATOH8	GO_FAD_BINDING	-0.174106	0.000417699	MF297	Negative
ATOH8	GO_COP9_SIGNALOSOME	-0.287782	3.35e-09	CC128	Negative	ANLN	GO_ALCOHOL_DEHYDROGENASE_NADPPLUS_ACTIVITY	-0.172385	0.000477237	MF45	Negative
ATOH8	GO_CLATHRIN_COAT_OF_COATED_PIT	-0.321043	3.28e-11	CC101	Negative	ANLN	GO_RNA_POLYMERASE_II_ACTIVITY	-0.172071	0.000488917	MF834	Negative
ATOH8	GO_CATALYTIC_STEP_1_SPLICEOSOME	-0.186594	0.00015302	CC61	Negative	ANLN	GO_VITAMIN_B6_BINDING	-0.172036	0.000490215	MF1008	Negative
ATOH8	GO_APICAL_PLASMA_MEMBRANE	-0.0513956	0.300967	CC27	Negative	ATOH8	GO_N_METHYLTRANSFERASE_ACTIVITY	0.171157	0.000524407	MF547	Positive
ATOH8	GO_SPECIFIC_GRANULE_MEMBRANE	-0.327103	1.33e-11	CC559	Negative	ANLN	GO_SNORNA_BINDING	0.170582	0.000547969	MF876	Positive
ATOH8	GO_POST_MRNA_RELEASE_SPLICEOSOMAL_COMPLEX	-0.0366157	0.461324	CC455	Negative	ATOH8	GO_METALLOEXOPEPTIDASE_ACTIVITY	-0.1705	0.000551389	MF504	Negative
ATOH8	GO_INTERCELLULAR_BRIDGE	-0.235865	1.5e-06	CC274	Negative	ANLN	GO_STRUCTURAL_CONSTITUENT_OF_SKIN_EPIDERMIS	0.169137	0.000611552	MF910	Positive
ATOH8	GO_ANCHORED_COMPONENT_OF_EXTERNAL_SIDE_OF_PLASMA_MEMBRANE	-0.308991	1.88e-10	CC18	Negative	ANLN	GO_ALDITOL_NADPPLUS_1_OXIDOREDUCTASE_ACTIVITY	-0.169071	0.00061464	MF48	Negative
ATOH8	GO_BRUSH_BORDER_MEMBRANE	-0.0402866	0.417607	CC55	Negative	ATOH8	GO_ENDORIBONUCLEASE_ACTIVITY_PRODUCING_5_PHOSPHOMONOESTERS	-0.168797	0.000627473	MF276	Negative
ATOH8	GO_NUCLEAR_REPLICATION_FORK	-0.33355	4.94e-12	CC400	Negative	ANLN	GO_LIGASE_ACTIVITY	0.168263	0.000653304	MF456	Positive
ATOH8	GO_SYNAPTIC_VESICLE_MEMBRANE	0.0150826	0.761615	CC578	Positive	ATOH8	GO_AMIDE_TRANSMEMBRANE_TRANSPORTER_ACTIVITY	-0.167451	0.000694409	MF55	Negative
ATOH8	GO_T_CELL_RECEPTOR_COMPLEX	-0.235551	1.55e-06	CC580	Negative	ANLN	GO_NUCLEAR_RECEPTOR_TRANSCRIPTION_COACTIVATOR_ACTIVITY	0.167158	0.000709807	MF579	Positive
ATOH8	GO_TOR_COMPLEX	-0.0616408	0.214638	CC591	Negative	ATOH8	GO_METAL_ION_TRANSMEMBRANE_TRANSPORTER_ACTIVITY	-0.166268	0.000758561	MF499	Negative
ATOH8	GO_MICROTUBULE_ORGANIZING_CENTER_ATTACHMENT_SITE	-0.038152	0.442724	CC339	Negative	ATOH8	GO_NEUROPEPTIDE_RECEPTOR_ACTIVITY	-0.165798	0.000785592	MF561	Negative
ATOH8	GO_SARCOLEMMA	-0.287041	3.69e-09	CC527	Negative	ANLN	GO_MRNA_METHYLTRANSFERASE_ACTIVITY	0.164791	0.00084642	MF538	Positive
ATOH8	GO_CORTICAL_ACTIN_CYTOSKELETON	-0.105877	0.0327264	CC135	Negative	ATOH8	GO_FIBROBLAST_GROWTH_FACTOR_RECEPTOR_BINDING	-0.164601	0.000858405	MF306	Negative
ATOH8	GO_APICOLATERAL_PLASMA_MEMBRANE	0.107672	0.0298684	CC28	Positive	ATOH8	GO_G_PROTEIN_COUPLED_NEUROTRANSMITTER_RECEPTOR_ACTIVITY	-0.164574	0.000860088	MF320	Negative
ATOH8	GO_MICROTUBULE_ASSOCIATED_COMPLEX	-0.384105	8.88e-16	CC337	Negative	ANLN	GO_TRNA_METHYLTRANSFERASE_ACTIVITY	0.163368	0.000939838	MF982	Positive
ATOH8	GO_CATALYTIC_STEP_2_SPLICEOSOME	-0.0520024	0.295288	CC62	Negative	ATOH8	GO_TRIGLYCERIDE_LIPASE_ACTIVITY	0.162535	0.000998889	MF979	Positive
ATOH8	GO_DNA_REPLICATION_FACTOR_A_COMPLEX	-0.27442	1.83e-08	CC170	Negative	ANLN	GO_CARBOHYDRATE_TRANSMEMBRANE_TRANSPORTER_ACTIVITY	-0.162436	0.0010061	MF139	Negative
ATOH8	GO_NUCLEAR_ENVELOPE	-0.349893	3.65e-13	CC386	Negative	ANLN	GO_CYTOKINE_RECEPTOR_BINDING	0.162342	0.00101306	MF220	Positive
ATOH8	GO_PHAGOCYTIC_VESICLE_MEMBRANE	-0.317942	5.18e-11	CC429	Negative	ANLN	GO_G_PROTEIN_COUPLED_NUCLEOTIDE_RECEPTOR_ACTIVITY	0.16232	0.00101463	MF321	Positive
ATOH8	GO_PRESPLICEOSOME	0.272202	2.4e-08	CC470	Positive	ANLN	GO_CALCIUM_RELEASE_CHANNEL_ACTIVITY	0.1618	0.00105375	MF127	Positive
ATOH8	GO_PLATELET_DENSE_GRANULE	-0.0484713	0.329344	CC446	Negative	ATOH8	GO_CARBOXYPEPTIDASE_ACTIVITY	-0.161685	0.00106262	MF147	Negative
ATOH8	GO_TERTIARY_GRANULE_MEMBRANE	-0.394618	<2E-16	CC587	Negative	ANLN	GO_MONOSACCHARIDE_BINDING	0.161043	0.00111319	MF532	Positive
ATOH8	GO_LUMENAL_SIDE_OF_MEMBRANE	-0.233084	2e-06	CC315	Negative	ANLN	GO_HAPTOGLOBIN_BINDING	-0.160941	0.00112147	MF361	Negative
ATOH8	GO_TRANSCRIPTIONALLY_ACTIVE_CHROMATIN	-0.130226	0.00853015	CC604	Negative	ATOH8	GO_HYDROLASE_ACTIVITY_ACTING_ON_CARBON_NITROGEN_BUT_NOT_PEPTIDE_BONDS_IN_CYCLIC_AMIDINES	-0.159802	0.00121738	MF394	Negative
ATOH8	GO_DNA_PACKAGING_COMPLEX	-0.31934	4.22e-11	CC167	Negative	ANLN	GO_DNA_BINDING_TRANSCRIPTION_ACTIVATOR_ACTIVITY	0.159215	0.00126967	MF242	Positive
ATOH8	GO_LAMELLAR_BODY	-0.12042	0.0150675	CC302	Negative	ATOH8	GO_VOLTAGE_GATED_ION_CHANNEL_ACTIVITY	-0.158237	0.00136151	MF1016	Negative
ATOH8	GO_U2_SNRNP	-0.0334762	0.500649	CC615	Negative	ATOH8	GO_R_SMAD_BINDING	0.157723	0.00141211	MF792	Positive
ATOH8	GO_INTRACILIARY_TRANSPORT_PARTICLE	0.12519	0.0114781	CC277	Positive	ATOH8	GO_TRANSMEMBRANE_RECEPTOR_PROTEIN_KINASE_ACTIVITY	-0.157	0.00148632	MF972	Negative
ATOH8	GO_SECRETORY_GRANULE_MEMBRANE	-0.352632	2.32e-13	CC534	Negative	ANLN	GO_ODORANT_BINDING	-0.156837	0.00150355	MF599	Negative
ATOH8	GO_SPINDLE_POLE_CENTROSOME	-0.299229	7.28e-10	CC567	Negative	ANLN	GO_DOPAMINE_NEUROTRANSMITTER_RECEPTOR_ACTIVITY	-0.156785	0.00150908	MF254	Negative
ATOH8	GO_KINETOCHORE	-0.39543	<2E-16	CC300	Negative	ANLN	GO_LYSINE_N_METHYLTRANSFERASE_ACTIVITY	0.156233	0.00156894	MF480	Positive
ATOH8	GO_PHOTORECEPTOR_OUTER_SEGMENT	-0.0468164	0.346143	CC437	Negative	ATOH8	GO_PHOSPHATIDYLINOSITOL_PHOSPHATE_BINDING	-0.155774	0.00162035	MF695	Negative
ATOH8	GO_SIN3_TYPE_COMPLEX	0.0893092	0.0718919	CC541	Positive	ATOH8	GO_FATTY_ACYL_COA_BINDING	0.155609	0.00163918	MF302	Positive
ATOH8	GO_HOST_CELL_PART	-0.279478	9.72e-09	CC259	Negative	ANLN	GO_ELECTRON_TRANSFER_ACTIVITY	-0.15354	0.0018934	MF266	Negative
ATOH8	GO_CYTOPLASMIC_MICROTUBULE	-0.25941	1.11e-07	CC147	Negative	ANLN	GO_OXIDOREDUCTASE_ACTIVITY_ACTING_ON_NAD_P_H_HEME_PROTEIN_AS_ACCEPTOR	0.153051	0.00195845	MF623	Positive
ATOH8	GO_NUCLEAR_CHROMOSOME_TELOMERIC_REGION	-0.213668	1.38e-05	CC384	Negative	ANLN	GO_PROTEIN_KINASE_B_BINDING	0.152968	0.00196979	MF756	Positive
ATOH8	GO_SEH1_ASSOCIATED_COMPLEX	0.331083	7.23e-12	CC535	Positive	ANLN	GO_PHOSPHATIDYLINOSITOL_4_PHOSPHATE_BINDING	0.152386	0.00205032	MF687	Positive
ATOH8	GO_DISTAL_AXON	-0.315769	7.11e-11	CC165	Negative	ANLN	GO_DYSTROGLYCAN_BINDING	0.151414	0.00219168	MF263	Positive
ATOH8	GO_TRANS_GOLGI_NETWORK_TRANSPORT_VESICLE_MEMBRANE	-0.0730679	0.14115	CC596	Negative	ATOH8	GO_S_ACYLTRANSFERASE_ACTIVITY	0.150753	0.00229282	MF847	Positive
ATOH8	GO_OUTER_MITOCHONDRIAL_MEMBRANE_PROTEIN_COMPLEX	0.0222474	0.654515	CC415	Positive	ATOH8	GO_CATECHOLAMINE_BINDING	0.149786	0.00244853	MF158	Positive
ATOH8	GO_INTERCALATED_DISC	-0.334302	4.4e-12	CC273	Negative	ANLN	GO_THIOESTERASE_BINDING	0.149105	0.00256382	MF936	Positive
ATOH8	GO_EUKARYOTIC_48S_PREINITIATION_COMPLEX	-0.011746	0.813241	CC202	Negative	ATOH8	GO_ICOSANOID_RECEPTOR_ACTIVITY	-0.147248	0.002904	MF402	Negative
ATOH8	GO_INVADOPODIUM	-0.443977	<2E-16	CC295	Negative	ANLN	GO_ARYLSULFATASE_ACTIVITY	0.14709	0.00293464	MF81	Positive
ATOH8	GO_T_TUBULE	-0.181542	0.000231554	CC581	Negative	ANLN	GO_VOLTAGE_GATED_POTASSIUM_CHANNEL_ACTIVITY_INVOLVED_IN_CARDIAC_MUSCLE_CELL_ACTION_POTENTIAL_REPOLARIZATION	-0.146438	0.00306471	MF1018	Negative
ATOH8	GO_UNCONVENTIONAL_MYOSIN_COMPLEX	-0.223261	5.42e-06	CC621	Negative	ANLN	GO_TOLL_LIKE_RECEPTOR_BINDING	0.14628	0.00309709	MF941	Positive
ATOH8	GO_PRESYNAPTIC_ACTIVE_ZONE	-0.22288	5.63e-06	CC472	Negative	ANLN	GO_CHONDROITIN_SULFATE_BINDING	0.145494	0.00326224	MF179	Positive
ATOH8	GO_INNER_MITOCHONDRIAL_MEMBRANE_PROTEIN_COMPLEX	0.229465	2.9e-06	CC268	Positive	ANLN	GO_HISTONE_DEMETHYLASE_ACTIVITY_H3_K9_SPECIFIC	0.145068	0.00335522	MF377	Positive
ATOH8	GO_SARCOPLASM	-0.246494	4.77e-07	CC528	Negative	ANLN	GO_U6_SNRNA_BINDING	0.142999	0.00384155	MF989	Positive
ATOH8	GO_SITE_OF_POLARIZED_GROWTH	-0.308858	1.91e-10	CC544	Negative	ANLN	GO_CYTIDINE_DEAMINASE_ACTIVITY	-0.14192	0.00411967	MF216	Negative
ATOH8	GO_GEMINI_OF_COILED_BODIES	-0.12295	0.0130567	CC233	Negative	ATOH8	GO_NEUROTRANSMITTER_BINDING	-0.14087	0.00440766	MF563	Negative
ATOH8	GO_DYNEIN_COMPLEX	0.00177638	0.9715	CC172	Positive	ATOH8	GO_POLY_PURINE_TRACT_BINDING	-0.137255	0.00554327	MF721	Negative
ATOH8	GO_MLL3_4_COMPLEX	-0.086761	0.0804206	CC356	Negative	ATOH8	GO_NEUROPEPTIDE_RECEPTOR_BINDING	-0.136139	0.00594382	MF562	Negative
ATOH8	GO_SPLICEOSOMAL_TRI_SNRNP_COMPLEX	-0.109117	0.0277243	CC569	Negative	ATOH8	GO_NARROW_PORE_CHANNEL_ACTIVITY	-0.135787	0.00607513	MF557	Negative
ATOH8	GO_COPI_COATED_VESICLE	-0.318048	5.1e-11	CC129	Negative	ANLN	GO_AMYLOID_BETA_BINDING	0.135743	0.00609171	MF65	Positive
ATOH8	GO_TRANSCRIPTION_FACTOR_TFIIH_HOLO_COMPLEX	-0.0923843	0.0625983	CC601	Negative	ATOH8	GO_VOLTAGE_GATED_CATION_CHANNEL_ACTIVITY	-0.134084	0.00674942	MF1014	Negative
ATOH8	GO_CHAPERONIN_CONTAINING_T_COMPLEX	-0.236356	1.42e-06	CC82	Negative	ANLN	GO_EXTRACELLULAR_MATRIX_STRUCTURAL_CONSTITUENT_CONFERRING_TENSILE_STRENGTH	0.13255	0.00741304	MF296	Positive
ATOH8	GO_H4_H2A_HISTONE_ACETYLTRANSFERASE_COMPLEX	-0.039328	0.428782	CC247	Negative	ATOH8	GO_ADRENERGIC_RECEPTOR_BINDING	-0.131921	0.00770159	MF42	Negative
ATOH8	GO_CONDENSED_NUCLEAR_CHROMOSOME_KINETOCHORE	-0.38372	8.88e-16	CC124	Negative	ANLN	GO_HISTONE_METHYLTRANSFERASE_ACTIVITY_H3_K4_SPECIFIC	0.131556	0.00787346	MF381	Positive
ATOH8	GO_NUCLEAR_TRANSCRIPTION_FACTOR_COMPLEX	-0.135776	0.00607925	CC402	Negative	ANLN	GO_PHOSPHOLIPID_TRANSFER_ACTIVITY	0.130844	0.00821895	MF706	Positive
ATOH8	GO_AZUROPHIL_GRANULE	-0.282445	6.67e-09	CC41	Negative	ANLN	GO_TRANSLATION_ACTIVATOR_ACTIVITY	0.130356	0.00846356	MF962	Positive
ATOH8	GO_PLATELET_DENSE_TUBULAR_NETWORK	-0.345676	7.25e-13	CC448	Negative	ANLN	GO_TUMOR_NECROSIS_FACTOR_RECEPTOR_SUPERFAMILY_BINDING	0.130236	0.0085247	MF987	Positive
ATOH8	GO_ENDOCYTIC_PATCH	-0.226723	3.83e-06	CC176	Negative	ANLN	GO_PHOSPHATIDYLINOSITOL_BISPHOSPHATE_PHOSPHATASE_ACTIVITY	0.130148	0.00856981	MF691	Positive
ATOH8	GO_CATION_CHANNEL_COMPLEX	-0.113964	0.0214731	CC64	Negative	ATOH8	GO_CYSTEINE_TYPE_PEPTIDASE_ACTIVITY	-0.13004	0.00862539	MF215	Negative
ATOH8	GO_ENDOPLASMIC_RETICULUM_EXIT_SITE	-0.252183	2.53e-07	CC185	Negative	ANLN	GO_ENDODEOXYRIBONUCLEASE_ACTIVITY_PRODUCING_3_PHOSPHOMONOESTERS	0.129976	0.0086585	MF268	Positive
ATOH8	GO_CAVEOLA	-0.233998	1.82e-06	CC66	Negative	ANLN	GO_CHLORIDE_ION_BINDING	0.129679	0.00881356	MF177	Positive
ATOH8	GO_CYTOPLASMIC_DYNEIN_COMPLEX	-0.0604268	0.223822	CC145	Negative	ATOH8	GO_GATED_CHANNEL_ACTIVITY	-0.12893	0.00921603	MF331	Negative
ATOH8	GO_IMMUNOLOGICAL_SYNAPSE	-0.309528	1.74e-10	CC264	Negative	ANLN	GO_ADENYLATE_CYCLASE_ACTIVITY	0.128411	0.00950427	MF37	Positive
ATOH8	GO_COLLAGEN_CONTAINING_EXTRACELLULAR_MATRIX	-0.303444	4.08e-10	CC115	Negative	ANLN	GO_CYCLIC_NUCLEOTIDE_DEPENDENT_PROTEIN_KINASE_ACTIVITY	0.127978	0.00975058	MF200	Positive
ATOH8	GO_ENDOSOME_LUMEN	-0.207333	2.49e-05	CC193	Negative	ANLN	GO_DYNEIN_HEAVY_CHAIN_BINDING	0.12742	0.0100766	MF259	Positive
ATOH8	GO_VESICLE_LUMEN	-0.384931	8.88e-16	CC626	Negative	ANLN	GO_NEUROTRANSMITTER_TRANSMEMBRANE_TRANSPORTER_ACTIVITY	0.126744	0.0104841	MF568	Positive
ATOH8	GO_ENDORIBONUCLEASE_COMPLEX	0.0220374	0.657567	CC192	Positive	ATOH8	GO_GLUTATHIONE_PEROXIDASE_ACTIVITY	0.124799	0.011741	MF344	Positive
ATOH8	GO_NMDA_SELECTIVE_GLUTAMATE_RECEPTOR_COMPLEX	-0.131589	0.00785794	CC380	Negative	ANLN	GO_IMMUNE_RECEPTOR_ACTIVITY	0.122837	0.0131414	MF404	Positive
ATOH8	GO_NUCLEAR_PERIPHERY	-0.259532	1.09e-07	CC396	Negative	ANLN	GO_GLUTAMATE_BINDING	0.122708	0.0132385	MF341	Positive
ATOH8	GO_CILIARY_TRANSITION_ZONE	0.0385902	0.437499	CC97	Positive	ATOH8	GO_PASSIVE_TRANSMEMBRANE_TRANSPORTER_ACTIVITY	-0.122334	0.0135234	MF647	Negative
ATOH8	GO_APICAL_DENDRITE	-0.278066	1.16e-08	CC24	Negative	ANLN	GO_PROTON_TRANSMEMBRANE_TRANSPORTER_ACTIVITY	-0.121627	0.0140763	MF783	Negative
ATOH8	GO_PROTEASOME_ACCESSORY_COMPLEX	-0.40077	<2E-16	CC478	Negative	ANLN	GO_TAU_PROTEIN_KINASE_ACTIVITY	0.121526	0.0141567	MF930	Positive
ATOH8	GO_CONTRACTILE_FIBER	-0.292878	1.71e-09	CC126	Negative	ANLN	GO_IRON_ION_TRANSMEMBRANE_TRANSPORTER_ACTIVITY	0.120758	0.0147838	MF436	Positive
ATOH8	GO_PROTEIN_ACETYLTRANSFERASE_COMPLEX	-0.00770274	0.876883	CC482	Negative	ATOH8	GO_CAMP_BINDING	-0.120606	0.0149109	MF131	Negative
ATOH8	GO_ORGANELLAR_RIBOSOME	0.0255106	0.607841	CC409	Positive	ATOH8	GO_NADPH_BINDING	-0.119172	0.0161555	MF553	Negative
ATOH8	GO_ANCHORED_COMPONENT_OF_MEMBRANE	-0.222878	5.63e-06	CC19	Negative	ANLN	GO_PURINERGIC_RECEPTOR_ACTIVITY	0.118686	0.0165977	MF786	Positive
ATOH8	GO_ESCRT_COMPLEX	0.312421	1.15e-10	CC198	Positive	ANLN	GO_NADPLUS_ADP_RIBOSYLTRANSFERASE_ACTIVITY	0.118613	0.0166649	MF554	Positive
ATOH8	GO_ANCHORED_COMPONENT_OF_SYNAPTIC_MEMBRANE	-0.0178066	0.720225	CC21	Negative	ATOH8	GO_S100_PROTEIN_BINDING	-0.118551	0.016722	MF849	Negative
ATOH8	GO_PROTEASOME_REGULATORY_PARTICLE_BASE_SUBCOMPLEX	-0.414011	<2E-16	CC481	Negative	ANLN	GO_DOPAMINE_RECEPTOR_BINDING	0.117703	0.0175234	MF255	Positive
ATOH8	GO_SPERM_HEAD	-0.0141398	0.776106	CC560	Negative	ATOH8	GO_RNA_CAP_BINDING	-0.117144	0.0180706	MF826	Negative
ATOH8	GO_MLL1_2_COMPLEX	-0.152755	0.00199896	CC355	Negative	ANLN	GO_VOLTAGE_GATED_POTASSIUM_CHANNEL_ACTIVITY_INVOLVED_IN_VENTRICULAR_CARDIAC_MUSCLE_CELL_ACTION_POTENTIAL_REPOLARIZATION	-0.116614	0.0186028	MF1019	Negative
ATOH8	GO_LAMELLIPODIUM_MEMBRANE	-0.363493	3.69e-14	CC304	Negative	ANLN	GO_HYDROLASE_ACTIVITY_ACTING_ON_CARBON_NITROGEN_BUT_NOT_PEPTIDE_BONDS	-0.115993	0.0192439	MF392	Negative
ATOH8	GO_GOLGI_STACK	-0.0640757	0.197041	CC244	Negative	ATOH8	GO_PRENYLTRANSFERASE_ACTIVITY	-0.115271	0.0200129	MF735	Negative
ATOH8	GO_CHLORIDE_CHANNEL_COMPLEX	-0.150251	0.0023725	CC83	Negative	ANLN	GO_PROTEIN_ADP_RIBOSYLASE_ACTIVITY	0.114912	0.0204051	MF743	Positive
ATOH8	GO_NEURON_SPINE	-0.29748	9.23e-10	CC377	Negative	ANLN	GO_VASCULAR_ENDOTHELIAL_GROWTH_FACTOR_RECEPTOR_BINDING	0.112223	0.0235614	MF1005	Positive
ATOH8	GO_CONDENSED_CHROMOSOME	-0.362888	4.11e-14	CC119	Negative	ANLN	GO_PLATELET_DERIVED_GROWTH_FACTOR_RECEPTOR_BINDING	0.112078	0.0237433	MF718	Positive
ATOH8	GO_CORNIFIED_ENVELOPE	-0.282406	6.7e-09	CC134	Negative	ANLN	GO_BENZODIAZEPINE_RECEPTOR_ACTIVITY	-0.111923	0.023938	MF98	Negative
ATOH8	GO_MICROFIBRIL	-0.36176	4.97e-14	CC335	Negative	ANLN	GO_CYTOKINE_ACTIVITY	0.11136	0.0246595	MF217	Positive
ATOH8	GO_CELL_SUBSTRATE_JUNCTION	-0.298056	8.54e-10	CC77	Negative	ANLN	GO_TRANSMEMBRANE_RECEPTOR_PROTEIN_TYROSINE_KINASE_ADAPTOR_ACTIVITY	-0.110572	0.0257011	MF977	Negative
ATOH8	GO_EXTRINSIC_COMPONENT_OF_ORGANELLE_MEMBRANE	0.178522	0.000295075	CC215	Positive	ANLN	GO_STRUCTURAL_MOLECULE_ACTIVITY_CONFERRING_ELASTICITY	0.110385	0.0259549	MF912	Positive
ATOH8	GO_MITOCHONDRIAL_LARGE_RIBOSOMAL_SUBUNIT	0.0214969	0.665451	CC346	Positive	ATOH8	GO_PSEUDOURIDINE_SYNTHASE_ACTIVITY	-0.10916	0.0276625	MF784	Negative
ATOH8	GO_PHOSPHATIDYLINOSITOL_3_KINASE_COMPLEX	-0.360221	6.48e-14	CC433	Negative	ANLN	GO_PHOSPHOLIPASE_ACTIVITY	-0.108964	0.0279451	MF701	Negative
ATOH8	GO_FILOPODIUM	-0.342983	1.12e-12	CC224	Negative	ANLN	GO_CATION_CHANNEL_ACTIVITY	-0.108494	0.0286325	MF160	Negative
ATOH8	GO_CELL_CELL_JUNCTION	-0.242408	7.45e-07	CC71	Negative	ANLN	GO_CHLORIDE_CHANNEL_INHIBITOR_ACTIVITY	0.105844	0.0327802	MF175	Positive
ATOH8	GO_MAST_CELL_GRANULE	-0.309457	1.76e-10	CC321	Negative	ANLN	GO_ALDEHYDE_DEHYDROGENASE_NAD_P_PLUS_ACTIVITY	-0.105661	0.0330857	MF46	Negative
ATOH8	GO_CCR4_NOT_COMPLEX	0.0694908	0.161722	CC67	Positive	ATOH8	GO_ATPASE_ACTIVATOR_ACTIVITY	-0.105053	0.0341148	MF87	Negative
ATOH8	GO_MYOSIN_FILAMENT	-0.276556	1.4e-08	CC367	Negative	ANLN	GO_CHLORIDE_TRANSMEMBRANE_TRANSPORTER_ACTIVITY	0.104732	0.0346697	MF178	Positive
ATOH8	GO_SPINDLE_POLE	-0.388095	4.44e-16	CC566	Negative	ANLN	GO_SOLUTE_SODIUM_SYMPORTER_ACTIVITY	0.103958	0.0360376	MF891	Positive
ATOH8	GO_BOX_H_ACA_RNP_COMPLEX	-0.0117797	0.812716	CC53	Negative	ATOH8	GO_CYCLIN_DEPENDENT_PROTEIN_SERINE_THREONINE_KINASE_INHIBITOR_ACTIVITY	0.103946	0.0360583	MF205	Positive
ATOH8	GO_PRESYNAPTIC_ACTIVE_ZONE_CYTOPLASMIC_COMPONENT	-0.125029	0.0115855	CC473	Negative	ATOH8	GO_SMAD_BINDING	-0.103872	0.0361929	MF871	Negative
ATOH8	GO_MICROBODY_MEMBRANE	0.262422	7.77e-08	CC334	Positive	ANLN	GO_NUCLEOTIDE_RECEPTOR_ACTIVITY	0.103702	0.0365005	MF593	Positive
ATOH8	GO_NEURON_PROJECTION_CYTOPLASM	-0.0932832	0.0600765	CC374	Negative	ATOH8	GO_MONOVALENT_INORGANIC_CATION_TRANSMEMBRANE_TRANSPORTER_ACTIVITY	-0.10315	0.0375135	MF533	Negative
ATOH8	GO_POSTSYNAPTIC_MEMBRANE	-0.242753	7.17e-07	CC461	Negative	ANLN	GO_OXALATE_TRANSMEMBRANE_TRANSPORTER_ACTIVITY	-0.102898	0.0379851	MF614	Negative
ATOH8	GO_INTRINSIC_COMPONENT_OF_ORGANELLE_MEMBRANE	-0.131838	0.00774067	CC286	Negative	ANLN	GO_ATPASE_COUPLED_INTRAMEMBRANE_LIPID_TRANSPORTER_ACTIVITY	-0.102699	0.0383606	MF92	Negative
ATOH8	GO_LATERAL_ELEMENT	-0.337511	2.66e-12	CC309	Negative	ANLN	GO_GROWTH_FACTOR_BINDING	0.102111	0.0394883	MF350	Positive
ATOH8	GO_MYOSIN_COMPLEX	-0.290825	2.25e-09	CC366	Negative	ANLN	GO_SODIUM_PHOSPHATE_SYMPORTER_ACTIVITY	-0.0998599	0.0440688	MF883	Negative
ATOH8	GO_U2_TYPE_CATALYTIC_STEP_2_SPLICEOSOME	-0.126145	0.0108583	CC616	Negative	ATOH8	GO_PROTEIN_KINASE_A_REGULATORY_SUBUNIT_BINDING	0.0995075	0.0448247	MF755	Positive
ATOH8	GO_ER_MEMBRANE_PROTEIN_COMPLEX	-0.146322	0.00308843	CC195	Negative	ANLN	GO_PYROPHOSPHATE_HYDROLYSIS_DRIVEN_PROTON_TRANSMEMBRANE_TRANSPORTER_ACTIVITY	0.0994042	0.0450483	MF788	Positive
ATOH8	GO_ATPASE_COMPLEX	0.0980104	0.048159	CC32	Positive	ATOH8	GO_PHOSPHATIDYLINOSITOL_PHOSPHATE_PHOSPHATASE_ACTIVITY	0.0993586	0.0451473	MF697	Positive
ATOH8	GO_CD40_RECEPTOR_COMPLEX	-0.238474	1.14e-06	CC68	Negative	ANLN	GO_ACETYLCHOLINE_GATED_CATION_SELECTIVE_CHANNEL_ACTIVITY	0.0989817	0.0459729	MF16	Positive
ATOH8	GO_MYOSIN_II_COMPLEX	-0.181732	0.000228022	CC368	Negative	ANLN	GO_LIPOPEPTIDE_BINDING	0.0988163	0.0463392	MF465	Positive
ATOH8	GO_MANCHETTE	-0.0571774	0.249771	CC320	Negative	ATOH8	GO_TRANSLATION_INITIATION_FACTOR_ACTIVITY	-0.0984731	0.047107	MF965	Negative
ATOH8	GO_ACETYLCHOLINE_GATED_CHANNEL_COMPLEX	-0.221402	6.51e-06	CC5	Negative	ANLN	GO_BMP_BINDING	-0.0980478	0.0480732	MF108	Negative
ATOH8	GO_CLEAVAGE_FURROW	-0.392553	2.22e-16	CC110	Negative	ANLN	GO_EPHRIN_RECEPTOR_ACTIVITY	0.0978958	0.0484224	MF278	Positive
ATOH8	GO_CONNEXIN_COMPLEX	-0.0631693	0.203464	CC125	Negative	ATOH8	GO_PEPTIDE_HORMONE_RECEPTOR_BINDING	-0.0958672	0.0532914	MF658	Negative
ATOH8	GO_POLYSOMAL_RIBOSOME	0.253501	2.18e-07	CC452	Positive	ANLN	GO_ALDEHYDE_LYASE_ACTIVITY	0.0950174	0.0554488	MF47	Positive
ATOH8	GO_RNA_POLYMERASE_III_TRANSCRIPTION_FACTOR_COMPLEX	-0.0759582	0.126042	CC519	Negative	ATOH8	GO_MIRNA_BINDING	0.0946569	0.0563857	MF517	Positive
ATOH8	GO_CHROMOSOME_TELOMERIC_REGION	-0.256931	1.47e-07	CC89	Negative	ANLN	GO_OXIDOREDUCTASE_ACTIVITY_OXIDIZING_METAL_IONS_OXYGEN_AS_ACCEPTOR	0.0945956	0.0565461	MF640	Positive
ATOH8	GO_ORGANELLE_SUBCOMPARTMENT	-0.185024	0.000174241	CC413	Negative	ANLN	GO_OLIGOSACCHARIDE_BINDING	-0.093095	0.0605974	MF602	Negative
ATOH8	GO_AXONEMAL_DYNEIN_COMPLEX	-0.0209883	0.672903	CC40	Negative	ATOH8	GO_MAP_KINASE_ACTIVITY	-0.0906066	0.0678421	MF491	Negative
ATOH8	GO_POLYSOME	0.0853611	0.0854435	CC453	Positive	ATOH8	GO_LEUCINE_ZIPPER_DOMAIN_BINDING	-0.09057	0.0679535	MF449	Negative
ATOH8	GO_PHOTORECEPTOR_INNER_SEGMENT	-0.057897	0.243852	CC436	Negative	ATOH8	GO_PROTEIN_SERINE_THREONINE_PHOSPHATASE_INHIBITOR_ACTIVITY	-0.0889577	0.0730227	MF773	Negative
ATOH8	GO_HIGH_DENSITY_LIPOPROTEIN_PARTICLE	-0.110554	0.0257265	CC253	Negative	ATOH8	GO_RNA_METHYLTRANSFERASE_ACTIVITY	0.0885523	0.0743443	MF828	Positive
ATOH8	GO_SMALL_RIBOSOMAL_SUBUNIT	0.213147	1.45e-05	CC548	Positive	ANLN	GO_PROTEIN_MEMBRANE_ADAPTOR	0.0884286	0.0747517	MF760	Positive
ATOH8	GO_BASAL_PART_OF_CELL	-0.0754989	0.128355	CC44	Negative	ATOH8	GO_UBIQUITIN_UBIQUITIN_LIGASE_ACTIVITY	0.0878738	0.0766005	MF1001	Positive
ATOH8	GO_EXTRINSIC_COMPONENT_OF_MITOCHONDRIAL_INNER_MEMBRANE	0.242185	7.63e-07	CC214	Positive	ANLN	GO_STRUCTURAL_CONSTITUENT_OF_MYELIN_SHEATH	-0.0866665	0.0807518	MF906	Negative
ATOH8	GO_ER_TO_GOLGI_TRANSPORT_VESICLE_MEMBRANE	-0.369333	1.33e-14	CC196	Negative	ANLN	GO_AMMONIUM_ION_BINDING	0.0865586	0.0811315	MF62	Positive
ATOH8	GO_PLATELET_ALPHA_GRANULE_LUMEN	-0.275816	1.54e-08	CC444	Negative	ANLN	GO_PHOSPHATE_ION_TRANSMEMBRANE_TRANSPORTER_ACTIVITY	-0.0853646	0.0854308	MF672	Negative
ATOH8	GO_MEMBRANE_COAT	-0.280541	8.5e-09	CC326	Negative	ANLN	GO_CAMP_DEPENDENT_PROTEIN_KINASE_REGULATOR_ACTIVITY	0.0851641	0.0861702	MF132	Positive
ATOH8	GO_ANAPHASE_PROMOTING_COMPLEX	-0.140207	0.00459852	CC17	Negative	ANLN	GO_ATPASE_COUPLED_ION_TRANSMEMBRANE_TRANSPORTER_ACTIVITY	0.0836647	0.0918658	MF93	Positive
ATOH8	GO_NUCLEAR_EUCHROMATIN	-0.0721277	0.146352	CC387	Negative	ATOH8	GO_DNA_N_GLYCOSYLASE_ACTIVITY	0.0830172	0.0944167	MF248	Positive
ATOH8	GO_RNA_POLYMERASE_III_COMPLEX	-0.0344669	0.488051	CC518	Negative	ATOH8	GO_GLYCINE_BINDING	-0.0826823	0.095758	MF346	Negative
ATOH8	GO_RECEPTOR_COMPLEX	-0.282283	6.81e-09	CC496	Negative	ANLN	GO_PHOSPHATIDYLCHOLINE_TRANSPORTER_ACTIVITY	0.0822042	0.0976996	MF674	Positive
ATOH8	GO_PRONUCLEUS	-0.313745	9.53e-11	CC477	Negative	ANLN	GO_DNA_APURINIC_OR_APYRIMIDINIC_SITE_ENDONUCLEASE_ACTIVITY	0.081079	0.102392	MF240	Positive
ATOH8	GO_TRANSCRIPTION_ELONGATION_FACTOR_COMPLEX	-0.0584951	0.239007	CC597	Negative	ATOH8	GO_TRANSFERASE_ACTIVITY_TRANSFERRING_HEXOSYL_GROUPS	-0.0806833	0.104084	MF952	Negative
ATOH8	GO_EXTRINSIC_COMPONENT_OF_ENDOSOME_MEMBRANE	-0.271381	2.65e-08	CC212	Negative	ANLN	GO_SECONDARY_ACTIVE_MONOCARBOXYLATE_TRANSMEMBRANE_TRANSPORTER_ACTIVITY	0.0798014	0.107935	MF852	Positive
ATOH8	GO_RNA_POLYMERASE_I_COMPLEX	-0.0312289	0.529849	CC514	Negative	ATOH8	GO_NUCLEOSIDE_DIPHOSPHATE_KINASE_ACTIVITY	-0.0786201	0.113268	MF585	Negative
ATOH8	GO_EUKARYOTIC_TRANSLATION_INITIATION_FACTOR_3_COMPLEX	0.0338802	0.495492	CC203	Positive	ATOH8	GO_INSULIN_RECEPTOR_BINDING	0.0784925	0.113856	MF415	Positive
ATOH8	GO_BRUSH_BORDER	-0.120838	0.0147176	CC54	Negative	ATOH8	GO_3_5_CYCLIC_AMP_PHOSPHODIESTERASE_ACTIVITY	0.0780904	0.115725	MF7	Positive
ATOH8	GO_VACUOLAR_LUMEN	-0.321444	3.09e-11	CC622	Negative	ANLN	GO_RNA_POLYMERASE_I_ACTIVITY	0.0775966	0.118054	MF832	Positive
ATOH8	GO_NEURON_TO_NEURON_SYNAPSE	-0.172041	0.000490021	CC378	Negative	ANLN	GO_ION_CHANNEL_REGULATOR_ACTIVITY	0.0767106	0.122323	MF430	Positive
ATOH8	GO_ENDOPEPTIDASE_COMPLEX	-0.390914	2.22e-16	CC183	Negative	ANLN	GO_LIGASE_ACTIVITY_FORMING_CARBON_OXYGEN_BONDS	0.0767004	0.122373	MF458	Positive
ATOH8	GO_MICROTUBULE_PLUS_END	-0.437583	<2E-16	CC340	Negative	ANLN	GO_DEAMINASE_ACTIVITY	-0.0764743	0.123482	MF224	Negative
ATOH8	GO_SCHAFFER_COLLATERAL_CA1_SYNAPSE	-0.194938	7.54e-05	CC531	Negative	ANLN	GO_COFACTOR_TRANSMEMBRANE_TRANSPORTER_ACTIVITY	-0.0763951	0.123872	MF189	Negative
ATOH8	GO_CILIARY_TIP	0.0186618	0.70739	CC96	Positive	ATOH8	GO_PHOSPHORIC_DIESTER_HYDROLASE_ACTIVITY	-0.0760292	0.125688	MF710	Negative
ATOH8	GO_SECONDARY_LYSOSOME	-0.297562	9.13e-10	CC533	Negative	ANLN	GO_TRANSFORMING_GROWTH_FACTOR_BETA_RECEPTOR_CYTOPLASMIC_MEDIATOR_ACTIVITY	-0.075977	0.125948	MF960	Negative
ATOH8	GO_VESICLE_COAT	-0.319936	3.87e-11	CC625	Negative	ANLN	GO_RNA_POLYMERASE_II_INTRONIC_TRANSCRIPTION_REGULATORY_REGION_SEQUENCE_SPECIFIC_DNA_BINDING	-0.0759178	0.126245	MF839	Negative
ATOH8	GO_MHC_CLASS_II_PROTEIN_COMPLEX	-0.281644	7.38e-09	CC330	Negative	ANLN	GO_ATP_DEPENDENT_MICROTUBULE_MOTOR_ACTIVITY_MINUS_END_DIRECTED	0.0746632	0.132648	MF84	Positive
ATOH8	GO_SODIUM_CHANNEL_COMPLEX	0.130381	0.00845109	CC554	Positive	ATOH8	GO_PROTEIN_SERINE_THREONINE_TYROSINE_KINASE_ACTIVITY	-0.0739143	0.136589	MF774	Negative
ATOH8	GO_NUCLEAR_LAMINA	-0.147201	0.00291314	CC392	Negative	ANLN	GO_TRANSMEMBRANE_EPHRIN_RECEPTOR_ACTIVITY	0.0736251	0.138134	MF971	Positive
ATOH8	GO_ATPASE_DEPENDENT_TRANSMEMBRANE_TRANSPORT_COMPLEX	0.145163	0.00333438	CC33	Positive	ANLN	GO_SODIUM_PROTON_ANTIPORTER_ACTIVITY	0.0735675	0.138444	MF884	Positive
ATOH8	GO_MICROBODY	0.262543	7.66e-08	CC332	Positive	ANLN	GO_TRNA_GUANINE_METHYLTRANSFERASE_ACTIVITY	0.0715706	0.149503	MF981	Positive
ATOH8	GO_POSTSYNAPTIC_DENSITY_INTRACELLULAR_COMPONENT	-0.123964	0.0123198	CC457	Negative	ATOH8	GO_ACTIVE_ION_TRANSMEMBRANE_TRANSPORTER_ACTIVITY	-0.0710292	0.152614	MF30	Negative
ATOH8	GO_CAJAL_BODY	-0.21163	1.67e-05	CC56	Negative	ANLN	GO_ATPASE_ACTIVITY_COUPLED_TO_TRANSMEMBRANE_MOVEMENT_OF_IONS_ROTATIONAL_MECHANISM	0.0708859	0.153445	MF90	Positive
ATOH8	GO_MRNA_CLEAVAGE_AND_POLYADENYLATION_SPECIFICITY_FACTOR_COMPLEX	-0.212261	1.57e-05	CC358	Negative	ANLN	GO_HISTONE_ACETYLTRANSFERASE_ACTIVITY_H4_K5_SPECIFIC	0.0705928	0.155157	MF371	Positive
ATOH8	GO_GOLGI_TRANSPORT_COMPLEX	0.178658	0.000291902	CC245	Positive	ANLN	GO_CYSTEINE_TYPE_ENDOPEPTIDASE_ACTIVITY_INVOLVED_IN_APOPTOTIC_SIGNALING_PATHWAY	-0.0705787	0.15524	MF211	Negative
ATOH8	GO_TRICARBOXYLIC_ACID_CYCLE_ENZYME_COMPLEX	0.0952208	0.0549258	CC611	Positive	ATOH8	GO_HORMONE_RECEPTOR_BINDING	-0.0699541	0.158937	MF386	Negative
ATOH8	GO_ORGANELLE_ENVELOPE_LUMEN	-0.0695406	0.161421	CC410	Negative	ATOH8	GO_POLY_A_BINDING	-0.0678525	0.171865	MF719	Negative
ATOH8	GO_CARBOXY_TERMINAL_DOMAIN_PROTEIN_KINASE_COMPLEX	-0.0724716	0.144432	CC60	Negative	ATOH8	GO_ANKYRIN_BINDING	-0.0675887	0.173541	MF71	Negative
ATOH8	GO_9PLUS2_MOTILE_CILIUM	0.135854	0.00605005	CC3	Positive	ANLN	GO_NEUROTRANSMITTER_RECEPTOR_ACTIVITY_INVOLVED_IN_REGULATION_OF_POSTSYNAPTIC_MEMBRANE_POTENTIAL	0.0670345	0.177103	MF565	Positive
ATOH8	GO_ESCRT_I_COMPLEX	0.298788	7.73e-10	CC199	Positive	ANLN	GO_IONOTROPIC_GLUTAMATE_RECEPTOR_ACTIVITY	0.0668657	0.178198	MF433	Positive
ATOH8	GO_ISWI_TYPE_COMPLEX	0.00281563	0.954841	CC296	Positive	ATOH8	GO_DIPEPTIDASE_ACTIVITY	0.0668148	0.178529	MF235	Positive
ATOH8	GO_ENDOCYTIC_VESICLE_MEMBRANE	-0.353585	1.98e-13	CC179	Negative	ANLN	GO_HISTONE_DEACETYLASE_ACTIVITY_H3_K14_SPECIFIC	-0.066232	0.182356	MF374	Negative
ATOH8	GO_CATION_TRANSPORTING_ATPASE_COMPLEX	0.0444691	0.370887	CC65	Positive	ATOH8	GO_ORGANIC_HYDROXY_COMPOUND_TRANSMEMBRANE_TRANSPORTER_ACTIVITY	-0.0655837	0.186683	MF611	Negative
ATOH8	GO_INTERMEDIATE_FILAMENT_CYTOSKELETON	-0.184446	0.000182738	CC275	Negative	ANLN	GO_DEATH_DOMAIN_BINDING	-0.0636168	0.200274	MF225	Negative
ATOH8	GO_INTEGRAL_COMPONENT_OF_SYNAPTIC_VESICLE_MEMBRANE	0.164427	0.000869487	CC271	Positive	ANLN	GO_CLASS_I_DNA_APURINIC_OR_APYRIMIDINIC_SITE_ENDONUCLEASE_ACTIVITY	-0.062245	0.21017	MF182	Negative
ATOH8	GO_N_TERMINAL_PROTEIN_ACETYLTRANSFERASE_COMPLEX	-0.205392	2.97e-05	CC369	Negative	ANLN	GO_SPHINGOLIPID_TRANSPORTER_ACTIVITY	-0.061339	0.216896	MF894	Negative
ATOH8	GO_RNA_CAP_BINDING_COMPLEX	-0.239116	1.06e-06	CC512	Negative	ANLN	GO_POTASSIUM_ION_LEAK_CHANNEL_ACTIVITY	-0.0604662	0.22352	MF731	Negative
ATOH8	GO_TELOMERE_CAP_COMPLEX	-0.0256811	0.605444	CC583	Negative	ATOH8	GO_AMINOPEPTIDASE_ACTIVITY	-0.0600265	0.226911	MF61	Negative
ATOH8	GO_RNA_POLYMERASE_II_TRANSCRIPTION_FACTOR_COMPLEX	-0.0889906	0.0729161	CC517	Negative	ATOH8	GO_CYCLIN_BINDING	0.0599325	0.22764	MF203	Positive
ATOH8	GO_LAMININ_COMPLEX	-0.0845287	0.0885481	CC305	Negative	ATOH8	GO_PHOSPHATIDYLINOSITOL_5_PHOSPHATE_BINDING	-0.0598902	0.227969	MF688	Negative
ATOH8	GO_TRAPP_COMPLEX	0.155637	0.00163599	CC610	Positive	ANLN	GO_CARBOHYDRATE_DERIVATIVE_TRANSMEMBRANE_TRANSPORTER_ACTIVITY	0.0595615	0.230537	MF136	Positive
ATOH8	GO_LYSOSOMAL_LUMEN	-0.235865	1.5e-06	CC316	Negative	ANLN	GO_EXTRACELLULAR_MATRIX_CONSTITUENT_CONFERRING_ELASTICITY	0.0593756	0.231998	MF293	Positive
ATOH8	GO_CONDENSED_CHROMOSOME_CENTROMERIC_REGION	-0.390112	4.44e-16	CC120	Negative	ANLN	GO_CARBON_OXYGEN_LYASE_ACTIVITY	0.0590415	0.23464	MF143	Positive
ATOH8	GO_HIPPOCAMPAL_MOSSY_FIBER_TO_CA3_SYNAPSE	-0.107821	0.029641	CC254	Negative	ATOH8	GO_BHLH_TRANSCRIPTION_FACTOR_BINDING	0.0583478	0.240194	MF102	Positive
ATOH8	GO_BETA_CATENIN_TCF_COMPLEX	-0.119701	0.0156861	CC49	Negative	ATOH8	GO_PROTEIN_KINASE_C_BINDING	-0.0571079	0.250348	MF758	Negative
ATOH8	GO_INTRINSIC_COMPONENT_OF_POSTSYNAPTIC_SPECIALIZATION_MEMBRANE	-0.0859116	0.0834388	CC290	Negative	ATOH8	GO_STEROID_BINDING	-0.0569354	0.251784	MF895	Negative
ATOH8	GO_L_TYPE_VOLTAGE_GATED_CALCIUM_CHANNEL_COMPLEX	-0.0207277	0.676734	CC301	Negative	ATOH8	GO_NEUROPEPTIDE_HORMONE_ACTIVITY	-0.0567938	0.252967	MF560	Negative
ATOH8	GO_MRNA_CLEAVAGE_FACTOR_COMPLEX	-0.126517	0.0106247	CC359	Negative	ATOH8	GO_MITOGEN_ACTIVATED_PROTEIN_KINASE_BINDING	-0.0564336	0.255995	MF521	Negative
ATOH8	GO_KINESIN_COMPLEX	-0.426379	<2E-16	CC299	Negative	ANLN	GO_METALLOAMINOPEPTIDASE_ACTIVITY	0.0563877	0.256382	MF500	Positive
ATOH8	GO_MKS_COMPLEX	0.146736	0.00300467	CC354	Positive	ANLN	GO_TRANSFORMING_GROWTH_FACTOR_BETA_ACTIVATED_RECEPTOR_ACTIVITY	0.0562172	0.257825	MF957	Positive
ATOH8	GO_SAGA_COMPLEX	0.0878451	0.0766971	CC525	Positive	ATOH8	GO_CORE_PROMOTER_BINDING	-0.0560688	0.259086	MF193	Negative
ATOH8	GO_PHOTORECEPTOR_DISC_MEMBRANE	-0.165396	0.000809359	CC435	Negative	ANLN	GO_LIPID_TRANSFER_ACTIVITY	0.0560344	0.259379	MF463	Positive
ATOH8	GO_REPLICATION_FORK	-0.332673	5.66e-12	CC500	Negative	ANLN	GO_HEXOSAMINIDASE_ACTIVITY	-0.0555763	0.2633	MF367	Negative
ATOH8	GO_ENDOPLASMIC_RETICULUM_SUBCOMPARTMENT	-0.0532169	0.284139	CC190	Negative	ATOH8	GO_POLY_PYRIMIDINE_TRACT_BINDING	-0.0549625	0.268617	MF722	Negative
ATOH8	GO_NUCLEAR_UBIQUITIN_LIGASE_COMPLEX	-0.0748443	0.131709	CC404	Negative	ATOH8	GO_FMN_BINDING	-0.0546776	0.27111	MF310	Negative
ATOH8	GO_CENTRIOLAR_SATELLITE	-0.279652	9.51e-09	CC79	Negative	ANLN	GO_CYSTEINE_TYPE_ENDOPEPTIDASE_ACTIVATOR_ACTIVITY_INVOLVED_IN_APOPTOTIC_PROCESS	0.0541871	0.275439	MF208	Positive
ATOH8	GO_CUL2_RING_UBIQUITIN_LIGASE_COMPLEX	0.0621821	0.210632	CC138	Positive	ATOH8	GO_PROTEIN_KINASE_A_BINDING	-0.0541584	0.275694	MF753	Negative
ATOH8	GO_EXORIBONUCLEASE_COMPLEX	-0.0593538	0.23217	CC209	Negative	ATOH8	GO_HYDROLASE_ACTIVITY_ACTING_ON_CARBON_NITROGEN_BUT_NOT_PEPTIDE_BONDS_IN_LINEAR_AMIDINES	0.0527014	0.288836	MF396	Positive
ATOH8	GO_PLATELET_ALPHA_GRANULE	-0.283238	6.02e-09	CC443	Negative	ANLN	GO_PHOSPHATIDYLETHANOLAMINE_BINDING	0.052184	0.293603	MF675	Positive
ATOH8	GO_INO80_TYPE_COMPLEX	0.126529	0.0106172	CC269	Positive	ATOH8	GO_UDP_GALACTOSYLTRANSFERASE_ACTIVITY	0.0520929	0.294447	MF1002	Positive
ATOH8	GO_NBAF_COMPLEX	0.16815	0.000658861	CC372	Positive	ANLN	GO_PHOSPHATIDYLINOSITOL_4_5_BISPHOSPHATE_PHOSPHATASE_ACTIVITY	0.0506672	0.307879	MF686	Positive
ATOH8	GO_HEMOGLOBIN_COMPLEX	0.124005	0.012291	CC250	Positive	ATOH8	GO_OXIDOREDUCTASE_ACTIVITY_ACTING_ON_THE_ALDEHYDE_OR_OXO_GROUP_OF_DONORS_NAD_OR_NADP_AS_ACCEPTOR	0.0505707	0.308802	MF632	Positive
ATOH8	GO_ROUGH_ENDOPLASMIC_RETICULUM_MEMBRANE	-0.0448652	0.366636	CC522	Negative	ATOH8	GO_GLUCOSIDASE_ACTIVITY	-0.0496059	0.318135	MF338	Negative
ATOH8	GO_TELOMERASE_HOLOENZYME_COMPLEX	-0.270652	2.9e-08	CC582	Negative	ANLN	GO_CALCIUM_CATION_ANTIPORTER_ACTIVITY	0.0495089	0.319084	MF118	Positive
ATOH8	GO_XY_BODY	-0.172203	0.000483965	CC631	Negative	ANLN	GO_LIGAND_GATED_ANION_CHANNEL_ACTIVITY	0.0487135	0.32693	MF451	Positive
ATOH8	GO_ENDONUCLEASE_COMPLEX	-0.0090141	0.856134	CC182	Negative	ATOH8	GO_TRANSLATION_ELONGATION_FACTOR_ACTIVITY	0.0486474	0.327587	MF963	Positive
ATOH8	GO_PROTON_TRANSPORTING_V_TYPE_ATPASE_COMPLEX	-0.104319	0.0353936	CC492	Negative	ATOH8	GO_PHOSPHATASE_INHIBITOR_ACTIVITY	0.0482427	0.331632	MF669	Positive
ATOH8	GO_RESPIRATORY_CHAIN_COMPLEX_IV	0.263789	6.61e-08	CC505	Positive	ANLN	GO_SUPEROXIDE_GENERATING_NADPH_OXIDASE_ACTIVATOR_ACTIVITY	0.0482207	0.331853	MF922	Positive
ATOH8	GO_GOLGI_CISTERNA	-0.0454496	0.360421	CC241	Negative	ATOH8	GO_ION_TRANSMEMBRANE_TRANSPORTER_ACTIVITY_PHOSPHORYLATIVE_MECHANISM	-0.0474594	0.339552	MF432	Negative
ATOH8	GO_MITOTIC_SPINDLE	-0.320752	3.43e-11	CC351	Negative	ANLN	GO_RNA_POLYMERASE_III_ACTIVITY	-0.0473016	0.341162	MF843	Negative
ATOH8	GO_MITOCHONDRIA_ASSOCIATED_ENDOPLASMIC_RETICULUM_MEMBRANE	-0.115068	0.0202334	CC345	Negative	ATOH8	GO_TRANSFERASE_ACTIVITY_TRANSFERRING_SULFUR_CONTAINING_GROUPS	-0.0468829	0.345458	MF956	Negative
ATOH8	GO_SM_LIKE_PROTEIN_FAMILY_COMPLEX	-0.032742	0.510095	CC545	Negative	ATOH8	GO_CIS_TRANS_ISOMERASE_ACTIVITY	-0.0468138	0.34617	MF181	Negative
ATOH8	GO_EUKARYOTIC_TRANSLATION_INITIATION_FACTOR_4F_COMPLEX	-0.0836207	0.0920374	CC204	Negative	ATOH8	GO_I_SMAD_BINDING	-0.0459898	0.354734	MF401	Negative
ATOH8	GO_TRANSCRIPTIONAL_REPRESSOR_COMPLEX	-0.0382033	0.442111	CC603	Negative	ATOH8	GO_MRNA_BINDING	0.0452251	0.362801	MF537	Positive
ATOH8	GO_PIGMENT_GRANULE	-0.336047	3.35e-12	CC439	Negative	ANLN	GO_CALCIUM_CHANNEL_REGULATOR_ACTIVITY	0.0451142	0.36398	MF120	Positive
ATOH8	GO_PHOTORECEPTOR_CONNECTING_CILIUM	0.0150991	0.761361	CC434	Positive	ATOH8	GO_ANDROGEN_RECEPTOR_BINDING	-0.0435744	0.380599	MF66	Negative
ATOH8	GO_TRANSCRIPTION_FACTOR_TFIID_COMPLEX	-0.125475	0.0112898	CC600	Negative	ATOH8	GO_IONOTROPIC_GLUTAMATE_RECEPTOR_BINDING	0.0427561	0.389617	MF434	Positive
ATOH8	GO_PHAGOPHORE_ASSEMBLY_SITE_MEMBRANE	0.0274872	0.58031	CC431	Positive	ATOH8	GO_AMMONIUM_TRANSMEMBRANE_TRANSPORTER_ACTIVITY	0.041725	0.401162	MF63	Positive
ATOH8	GO_BLOC_1_COMPLEX	0.0647511	0.192351	CC50	Positive	ATOH8	GO_PHOSPHATIDYLINOSITOL_4_5_BISPHOSPHATE_BINDING	-0.0404933	0.41522	MF685	Negative
ATOH8	GO_INCLUSION_BODY	-0.162925	0.00097084	CC265	Negative	ANLN	GO_CATALYTIC_ACTIVITY_ACTING_ON_A_TRNA	0.0401353	0.419359	MF155	Positive
ATOH8	GO_PSEUDOPODIUM	-0.266151	4.99e-08	CC495	Negative	ANLN	GO_C4_DICARBOXYLATE_TRANSMEMBRANE_TRANSPORTER_ACTIVITY	0.0392599	0.429582	MF113	Positive
ATOH8	GO_EUCHROMATIN	-0.192896	8.99e-05	CC201	Negative	ANLN	GO_DYNEIN_LIGHT_INTERMEDIATE_CHAIN_BINDING	0.0390516	0.432035	MF262	Positive
ATOH8	GO_REPLISOME	-0.326988	1.35e-11	CC501	Negative	ANLN	GO_SODIUM_ION_TRANSMEMBRANE_TRANSPORTER_ACTIVITY	-0.0386464	0.436832	MF882	Negative
ATOH8	GO_RESPIRASOME	0.284413	5.18e-09	CC502	Positive	ANLN	GO_SIALYLTRANSFERASE_ACTIVITY	-0.0383728	0.440087	MF864	Negative
ATOH8	GO_9PLUS0_NON_MOTILE_CILIUM	-0.115468	0.0198005	CC2	Negative	ATOH8	GO_MITOGEN_ACTIVATED_PROTEIN_KINASE_KINASE_BINDING	-0.0382928	0.441042	MF522	Negative
ATOH8	GO_MITOTIC_SPINDLE_POLE	-0.391494	2.22e-16	CC353	Negative	ANLN	GO_TRANSMEMBRANE_RECEPTOR_PROTEIN_SERINE_THREONINE_KINASE_ACTIVITY	0.0380855	0.443521	MF974	Positive
ATOH8	GO_CULLIN_RING_UBIQUITIN_LIGASE_COMPLEX	-0.0926928	0.0617231	CC142	Negative	ATOH8	GO_3_5_CYCLIC_GMP_PHOSPHODIESTERASE_ACTIVITY	0.0373823	0.451989	MF8	Positive
ATOH8	GO_RIBOSOME	0.189252	0.000122512	CC511	Positive	ANLN	GO_PEPTIDOGLYCAN_MURALYTIC_ACTIVITY	-0.0367189	0.46006	MF663	Negative
ATOH8	GO_NEUROMUSCULAR_JUNCTION	-0.266582	4.74e-08	CC373	Negative	ANLN	GO_PRIMARY_ACTIVE_TRANSMEMBRANE_TRANSPORTER_ACTIVITY	0.0365984	0.461535	MF736	Positive
ATOH8	GO_TRANSCRIPTION_FACTOR_COMPLEX	-0.071625	0.149193	CC599	Negative	ATOH8	GO_PHOSPHATIDYLINOSITOL_MONOPHOSPHATE_PHOSPHATASE_ACTIVITY	0.0360546	0.468224	MF693	Positive
ATOH8	GO_BLOC_COMPLEX	0.0769503	0.121156	CC51	Positive	ATOH8	GO_CARBOXY_LYASE_ACTIVITY	0.0358029	0.471336	MF145	Positive
ATOH8	GO_PROTON_TRANSPORTING_TWO_SECTOR_ATPASE_COMPLEX_CATALYTIC_DOMAIN	-0.0602007	0.225563	CC490	Negative	ATOH8	GO_HISTONE_DEACETYLASE_BINDING	-0.0349426	0.482064	MF375	Negative
ATOH8	GO_SET1C_COMPASS_COMPLEX	0.0144473	0.771371	CC538	Positive	ATOH8	GO_MANGANESE_ION_BINDING	-0.0347418	0.484587	MF487	Negative
ATOH8	GO_RUFFLE	-0.265228	5.58e-08	CC523	Negative	ANLN	GO_EFFLUX_TRANSMEMBRANE_TRANSPORTER_ACTIVITY	0.0347239	0.484811	MF265	Positive
ATOH8	GO_CHAPERONE_COMPLEX	-0.311664	1.28e-10	CC81	Negative	ANLN	GO_NADPLUS_KINASE_ACTIVITY	-0.0345278	0.487283	MF556	Negative
ATOH8	GO_CYTOCHROME_COMPLEX	0.295846	1.15e-09	CC144	Positive	ANLN	GO_INHIBITORY_EXTRACELLULAR_LIGAND_GATED_ION_CHANNEL_ACTIVITY	0.0342642	0.490616	MF407	Positive
ATOH8	GO_COPI_COATED_VESICLE_MEMBRANE	-0.328729	1.04e-11	CC130	Negative	ANLN	GO_COENZYME_BINDING	-0.0342128	0.491267	MF187	Negative
ATOH8	GO_NUCLEAR_HETEROCHROMATIN	-0.168428	0.000645217	CC389	Negative	ANLN	GO_MYRISTOYL_COA_HYDROLASE_ACTIVITY	-0.0341222	0.492415	MF544	Negative
ATOH8	GO_CHROMOCENTER	-0.277734	1.21e-08	CC86	Negative	ANLN	GO_POTASSIUM_ION_TRANSMEMBRANE_TRANSPORTER_ACTIVITY	-0.0335797	0.499325	MF732	Negative
ATOH8	GO_CLATHRIN_COATED_ENDOCYTIC_VESICLE	-0.366956	2.04e-14	CC103	Negative	ANLN	GO_RNA_POLYMERASE_II_TRANSCRIPTION_FACTOR_BINDING	0.0335524	0.499674	MF842	Positive
ATOH8	GO_INFLAMMASOME_COMPLEX	-0.122093	0.0137097	CC266	Negative	ATOH8	GO_OLFACTORY_RECEPTOR_ACTIVITY	-0.0335024	0.500315	MF600	Negative
ATOH8	GO_NUCLEAR_TRANSCRIPTIONAL_REPRESSOR_COMPLEX	0.0286953	0.563775	CC403	Positive	ATOH8	GO_ANTIPORTER_ACTIVITY	-0.0334631	0.500817	MF75	Negative
ATOH8	GO_ZYMOGEN_GRANULE	0.0221673	0.655678	CC632	Positive	ATOH8	GO_CALCIUM_DEPENDENT_PROTEIN_BINDING	-0.0331898	0.504322	MF124	Negative
ATOH8	GO_NUCLEOID	0.0362221	0.466158	CC405	Positive	ATOH8	GO_TRNA_BINDING	-0.0331292	0.505102	MF980	Negative
ATOH8	GO_RIBONUCLEOPROTEIN_GRANULE	-0.142641	0.00393172	CC509	Negative	ANLN	GO_HYDROLASE_ACTIVITY_ACTING_ON_ACID_PHOSPHORUS_NITROGEN_BONDS	-0.0318547	0.521633	MF391	Negative
ATOH8	GO_EXOCYTIC_VESICLE	-0.0633059	0.202487	CC207	Negative	ATOH8	GO_LYSINE_ACETYLATED_HISTONE_BINDING	0.0310167	0.532651	MF479	Positive
ATOH8	GO_DENDRITE_MEMBRANE	-0.0609198	0.220059	CC157	Negative	ATOH8	GO_ADRENERGIC_RECEPTOR_ACTIVITY	0.029721	0.549916	MF41	Positive
ATOH8	GO_IMMUNOGLOBULIN_COMPLEX	-0.231983	2.24e-06	CC262	Negative	ANLN	GO_INSULIN_LIKE_GROWTH_FACTOR_I_BINDING	0.0285812	0.565326	MF413	Positive
ATOH8	GO_PROTON_TRANSPORTING_TWO_SECTOR_ATPASE_COMPLEX_PROTON_TRANSPORTING_DOMAIN	-0.131166	0.00806114	CC491	Negative	ATOH8	GO_CYCLIC_NUCLEOTIDE_PHOSPHODIESTERASE_ACTIVITY	0.0285036	0.566384	MF202	Positive
ATOH8	GO_INTRINSIC_COMPONENT_OF_PRESYNAPTIC_MEMBRANE	-0.172877	0.000459445	CC292	Negative	ANLN	GO_LIGAND_GATED_CATION_CHANNEL_ACTIVITY	-0.0271466	0.585012	MF453	Negative
ATOH8	GO_AZUROPHIL_GRANULE_MEMBRANE	-0.192247	9.5e-05	CC43	Negative	ANLN	GO_NADP_RETINOL_DEHYDROGENASE_ACTIVITY	-0.02698	0.587319	MF552	Negative
ATOH8	GO_MULTIVESICULAR_BODY_MEMBRANE	0.0902771	0.0688524	CC362	Positive	ATOH8	GO_ENDONUCLEASE_ACTIVITY_ACTIVE_WITH_EITHER_RIBO_OR_DEOXYRIBONUCLEIC_ACIDS_AND_PRODUCING_3_PHOSPHOMONOESTERS	0.0268219	0.589512	MF271	Positive
ATOH8	GO_PLASMA_MEMBRANE_BOUNDED_CELL_PROJECTION_CYTOPLASM	-0.138204	0.00522204	CC440	Negative	ANLN	GO_XENOBIOTIC_TRANSMEMBRANE_TRANSPORTER_ACTIVITY	0.0268218	0.589513	MF1026	Positive
ATOH8	GO_SMN_COMPLEX	-0.0693348	0.162668	CC550	Negative	ATOH8	GO_NUCLEOSOME_BINDING	-0.0267466	0.590557	MF590	Negative
ATOH8	GO_SYNAPTONEMAL_STRUCTURE	-0.236185	1.45e-06	CC579	Negative	ANLN	GO_EXTRACELLULAR_MATRIX_STRUCTURAL_CONSTITUENT_CONFERRING_COMPRESSION_RESISTANCE	-0.0265378	0.593461	MF295	Negative
ATOH8	GO_NURD_COMPLEX	0.154427	0.00178033	CC407	Positive	ANLN	GO_PHOSPHATIDYLGLYCEROL_BINDING	-0.0265313	0.593552	MF676	Negative
ATOH8	GO_DNA_REPAIR_COMPLEX	-0.0811289	0.10218	CC169	Negative	ATOH8	GO_KINASE_INHIBITOR_ACTIVITY	-0.0260119	0.600803	MF441	Negative
ATOH8	GO_AUTOPHAGOSOME	-0.162656	0.000990098	CC34	Negative	ANLN	GO_CATALYTIC_ACTIVITY_ACTING_ON_A_RRNA	-0.0253189	0.610542	MF154	Negative
ATOH8	GO_PRECATALYTIC_SPLICEOSOME	-0.113313	0.0222348	CC466	Negative	ATOH8	GO_LIPID_TRANSPORTER_ACTIVITY	0.025072	0.614028	MF464	Positive
ATOH8	GO_TIGHT_JUNCTION	-0.0815386	0.100454	CC589	Negative	ATOH8	GO_RAC_GUANYL_NUCLEOTIDE_EXCHANGE_FACTOR_ACTIVITY	0.0249302	0.616034	MF796	Positive
ATOH8	GO_LATE_ENDOSOME_MEMBRANE	-0.105908	0.0326746	CC308	Negative	ATOH8	GO_METHYLATED_HISTONE_BINDING	0.0243125	0.624806	MF507	Positive
ATOH8	GO_METHYLTRANSFERASE_COMPLEX	-0.050094	0.313391	CC329	Negative	ATOH8	GO_CALCIUM_ACTIVATED_CATION_CHANNEL_ACTIVITY	-0.024002	0.629236	MF116	Negative
ATOH8	GO_APICAL_PART_OF_CELL	-0.124349	0.0120495	CC26	Negative	ATOH8	GO_LONG_CHAIN_FATTY_ACID_BINDING	0.0239261	0.63032	MF469	Positive
ATOH8	GO_ENDOCYTIC_VESICLE_LUMEN	-0.273454	2.06e-08	CC178	Negative	ANLN	GO_PURINE_NUCLEOTIDE_TRANSMEMBRANE_TRANSPORTER_ACTIVITY	-0.0233479	0.638611	MF785	Negative
ATOH8	GO_NUCLEAR_CYCLIN_DEPENDENT_PROTEIN_KINASE_HOLOENZYME_COMPLEX	-0.0833265	0.0931913	CC385	Negative	ATOH8	GO_DEMETHYLASE_ACTIVITY	0.0232357	0.640225	MF229	Positive
ATOH8	GO_CONTRACTILE_RING	-0.379642	2.22e-15	CC127	Negative	ANLN	GO_METALLOENDOPEPTIDASE_INHIBITOR_ACTIVITY	0.0227735	0.646891	MF503	Positive
ATOH8	GO_TRANSPORTER_COMPLEX	-0.129389	0.00896726	CC609	Negative	ATOH8	GO_BETA_CATENIN_BINDING	-0.0227235	0.647614	MF99	Negative
ATOH8	GO_PRP19_COMPLEX	-0.0711324	0.152017	CC494	Negative	ATOH8	GO_TRANSFERASE_ACTIVITY_TRANSFERRING_ALKYL_OR_ARYL_OTHER_THAN_METHYL_GROUPS	0.0224852	0.651064	MF949	Positive
ATOH8	GO_HETEROTRIMERIC_G_PROTEIN_COMPLEX	-0.354914	1.59e-13	CC252	Negative	ANLN	GO_HYDROLASE_ACTIVITY_HYDROLYZING_O_GLYCOSYL_COMPOUNDS	0.0217181	0.66222	MF400	Positive
ATOH8	GO_ARP2_3_PROTEIN_COMPLEX	-0.180108	0.000259923	CC29	Negative	ANLN	GO_VITAMIN_TRANSMEMBRANE_TRANSPORTER_ACTIVITY	-0.0204535	0.680774	MF1011	Negative
ATOH8	GO_INTERSTITIAL_MATRIX	-0.330575	7.82e-12	CC276	Negative	ANLN	GO_CYSTEINE_TYPE_ENDOPEPTIDASE_ACTIVITY_INVOLVED_IN_APOPTOTIC_PROCESS	-0.0200899	0.686144	MF210	Negative
ATOH8	GO_INTRINSIC_COMPONENT_OF_POSTSYNAPTIC_DENSITY_MEMBRANE	-0.0268442	0.589201	CC288	Negative	ATOH8	GO_PHOSPHATASE_ACTIVATOR_ACTIVITY	-0.0198008	0.690426	MF666	Negative
ATOH8	GO_SIN3_COMPLEX	0.173652	0.000432709	CC540	Positive	ANLN	GO_POSTSYNAPTIC_NEUROTRANSMITTER_RECEPTOR_ACTIVITY	0.0189957	0.702402	MF726	Positive
ATOH8	GO_TRANSPORT_VESICLE	-0.227805	3.44e-06	CC607	Negative	ANLN	GO_SIALIC_ACID_BINDING	0.0176797	0.722136	MF863	Positive
ATOH8	GO_PRESYNAPSE	-0.22048	7.13e-06	CC471	Negative	ANLN	GO_CO_RECEPTOR_BINDING	-0.0172611	0.728452	MF184	Negative
ATOH8	GO_NUCLEAR_INCLUSION_BODY	-0.120285	0.0151816	CC390	Negative	ATOH8	GO_PHOSPHATIDYLINOSITOL_3_5_BISPHOSPHATE_BINDING	-0.0168715	0.734349	MF679	Negative
ATOH8	GO_NUCLEAR_SPECK	-0.0456343	0.35847	CC401	Negative	ATOH8	GO_PHOSPHATIDYLINOSITOL_PHOSPHATE_5_PHOSPHATASE_ACTIVITY	0.0160356	0.747049	MF694	Positive
ATOH8	GO_CILIARY_BASAL_BODY	0.0065824	0.894678	CC91	Positive	ATOH8	GO_VITAMIN_D_RECEPTOR_BINDING	-0.0133055	0.788996	MF1010	Negative
ATOH8	GO_U12_TYPE_SPLICEOSOMAL_COMPLEX	0.0617866	0.213554	CC614	Positive	ATOH8	GO_MANNOSIDASE_ACTIVITY	-0.0112977	0.820246	MF489	Negative
ATOH8	GO_DOPAMINERGIC_SYNAPSE	-0.154695	0.00174739	CC171	Negative	ANLN	GO_FATTY_ACID_DERIVATIVE_BINDING	-0.0109199	0.826159	MF299	Negative
ATOH8	GO_INHIBITORY_SYNAPSE	-0.0612553	0.217525	CC267	Negative	ATOH8	GO_COA_HYDROLASE_ACTIVITY	0.0106359	0.830612	MF186	Positive
ATOH8	GO_MICROVILLUS	-0.241524	8.19e-07	CC341	Negative	ANLN	GO_C_C_CHEMOKINE_BINDING	-0.00934577	0.850902	MF111	Negative
ATOH8	GO_SEX_CHROMOSOME	-0.192095	9.63e-05	CC539	Negative	ANLN	GO_UBIQUITIN_PROTEIN_TRANSFERASE_REGULATOR_ACTIVITY	-0.00847876	0.864594	MF999	Negative
ATOH8	GO_ASTER	-0.273235	2.12e-08	CC30	Negative	ANLN	GO_LIGAND_GATED_ION_CHANNEL_ACTIVITY	0.00831328	0.867212	MF454	Positive
ATOH8	GO_GLUTAMATERGIC_SYNAPSE	-0.241065	8.61e-07	CC236	Negative	ANLN	GO_POTASSIUM_ION_ANTIPORTER_ACTIVITY	-0.00777795	0.875691	MF729	Negative
ATOH8	GO_SYMMETRIC_SYNAPSE	0.0667473	0.17897	CC575	Positive	ATOH8	GO_C2H2_ZINC_FINGER_DOMAIN_BINDING	0.00736032	0.882316	MF112	Positive
ATOH8	GO_RNA_POLYMERASE_COMPLEX	-0.10095	0.041798	CC513	Negative	ATOH8	GO_HEPARAN_SULFATE_SULFOTRANSFERASE_ACTIVITY	0.00712088	0.886118	MF365	Positive
ATOH8	GO_CYTOPLASMIC_UBIQUITIN_LIGASE_COMPLEX	-0.152985	0.00196743	CC152	Negative	ANLN	GO_CARDIOLIPIN_BINDING	0.00679235	0.891339	MF149	Positive
ATOH8	GO_LATE_ENDOSOME	-0.146647	0.00302257	CC307	Negative	ANLN	GO_SODIUM_TRANSMEMBRANE_TRANSPORTER_ACTIVITY_PHOSPHORYLATIVE_MECHANISM	-0.00674377	0.892111	MF885	Negative
ATOH8	GO_ENDOPLASMIC_RETICULUM_TUBULAR_NETWORK	-0.101099	0.0414946	CC191	Negative	ATOH8	GO_SYNTAXIN_BINDING	0.00624784	0.900002	MF926	Positive
ATOH8	GO_INTEGRATOR_COMPLEX	-0.105507	0.0333433	CC272	Negative	ATOH8	GO_VOLTAGE_GATED_ANION_CHANNEL_ACTIVITY	0.00538361	0.913776	MF1012	Positive
ATOH8	GO_PROTEASOME_CORE_COMPLEX_BETA_SUBUNIT_COMPLEX	-0.252915	2.33e-07	CC480	Negative	ANLN	GO_PHOSPHORUS_OXYGEN_LYASE_ACTIVITY	-0.00498293	0.920171	MF712	Negative
ATOH8	GO_COHESIN_COMPLEX	-0.299921	6.63e-10	CC114	Negative	ANLN	GO_MAGNESIUM_DEPENDENT_PROTEIN_SERINE_THREONINE_PHOSPHATASE_ACTIVITY	0.00443572	0.928913	MF484	Positive
ATOH8	GO_CELL_CORTEX_REGION	-0.274366	1.84e-08	CC73	Negative	ANLN	GO_HEXOSE_TRANSMEMBRANE_TRANSPORTER_ACTIVITY	0.00433923	0.930455	MF368	Positive
ATOH8	GO_SWR1_COMPLEX	0.062622	0.207416	CC574	Positive	ATOH8	GO_INORGANIC_ANION_TRANSMEMBRANE_TRANSPORTER_ACTIVITY	0.0039053	0.937395	MF409	Positive
ATOH8	GO_PLATELET_DENSE_GRANULE_LUMEN	-0.117354	0.0178635	CC447	Negative	ATOH8	GO_AMINO_ACID_BINDING	-0.00306582	0.950833	MF57	Negative
ATOH8	GO_CELL_CORTEX	-0.237105	1.31e-06	CC72	Negative	ANLN	GO_GABA_GATED_CHLORIDE_ION_CHANNEL_ACTIVITY	-0.00305902	0.950942	MF324	Negative
ATOH8	GO_MITOCHONDRIAL_PROTEIN_COMPLEX	0.135685	0.00611378	CC348	Positive	ANLN	GO_INTRAMEMBRANE_LIPID_TRANSPORTER_ACTIVITY	-0.00283397	0.954547	MF422	Negative
ATOH8	GO_EARLY_PHAGOSOME	-0.10936	0.0273783	CC175	Negative	ATOH8	GO_CYCLIC_NUCLEOTIDE_GATED_ION_CHANNEL_ACTIVITY	-0.00276812	0.955602	MF201	Negative
ATOH8	GO_BETA_CATENIN_DESTRUCTION_COMPLEX	-0.294176	1.44e-09	CC48	Negative	ANLN	GO_ATP_TRANSMEMBRANE_TRANSPORTER_ACTIVITY	0.00248385	0.960158	MF86	Positive
ATOH8	GO_AXOLEMMA	-0.26479	5.87e-08	CC36	Negative	ANLN	GO_QUATERNARY_AMMONIUM_GROUP_TRANSMEMBRANE_TRANSPORTER_ACTIVITY	-0.00233133	0.962602	MF790	Negative
ATOH8	GO_FICOLIN_1_RICH_GRANULE_MEMBRANE	-0.413799	<2E-16	CC222	Negative	ANLN	GO_NEUROPEPTIDE_BINDING	-0.00217387	0.965127	MF559	Negative
ATOH8	GO_RETROMER_COMPLEX	-0.162089	0.00103185	CC506	Negative	ANLN	GO_CATALYTIC_ACTIVITY_ACTING_ON_A_GLYCOPROTEIN	0.00187059	0.969989	MF153	Positive
ATOH8	GO_SEMAPHORIN_RECEPTOR_COMPLEX	-0.194311	7.96e-05	CC536	Negative	ANLN	GO_MUSCLE_ALPHA_ACTININ_BINDING	0.00105404	0.983087	MF539	Positive
ATOH8	GO_GABA_RECEPTOR_COMPLEX	-0.0389187	0.433606	CC230	Negative	ATOH8	GO_ACETYLTRANSFERASE_ACTIVITY	-0.000634583	0.989817	MF21	Negative
ATOH8	GO_PARANODE_REGION_OF_AXON	-0.124458	0.0119741	CC420	Negative	ATOH8	GO_SYNTAXIN_1_BINDING	0.00043144	0.993077	MF925	Positive
CRTAC1	GO_PRESYNAPTIC_ACTIVE_ZONE	-0.224076	5e-06	CC472	Negative	ATOH8	GO_MICROTUBULE_BINDING	-0.471822	<2E-16	MF513	Negative
CRTAC1	GO_COPI_VESICLE_COAT	-0.298012	8.59e-10	CC131	Negative	ATOH8	GO_MICROFILAMENT_MOTOR_ACTIVITY	-0.462518	<2E-16	MF512	Negative
CRTAC1	GO_APICOLATERAL_PLASMA_MEMBRANE	0.160683	0.00114251	CC28	Positive	ATOH8	GO_STRUCTURAL_CONSTITUENT_OF_CYTOSKELETON	-0.46171	<2E-16	MF903	Negative
CRTAC1	GO_MYOFILAMENT	-0.223905	5.08e-06	CC365	Negative	ATOH8	GO_TUBULIN_BINDING	-0.450464	<2E-16	MF985	Negative
CRTAC1	GO_ENDOSOME_MEMBRANE	-0.218775	8.42e-06	CC194	Negative	ATOH8	GO_MOTOR_ACTIVITY	-0.40788	<2E-16	MF534	Negative
CRTAC1	GO_NUCLEAR_MEMBRANE	-0.303962	3.8e-10	CC394	Negative	ATOH8	GO_LIPOPOLYSACCHARIDE_BINDING	-0.4041	<2E-16	MF466	Negative
CRTAC1	GO_PLASMA_MEMBRANE_BOUNDED_CELL_PROJECTION_CYTOPLASM	-0.110395	0.0259402	CC440	Negative	ATOH8	GO_EPHRIN_RECEPTOR_BINDING	-0.403861	<2E-16	MF279	Negative
CRTAC1	GO_CELL_PROJECTION_MEMBRANE	-0.187953	0.000136631	CC76	Negative	ATOH8	GO_PEPTIDOGLYCAN_BINDING	-0.394895	<2E-16	MF662	Negative
CRTAC1	GO_POSTSYNAPTIC_SPECIALIZATION_INTRACELLULAR_COMPONENT	-0.08504	0.0866307	CC462	Negative	ATOH8	GO_ACYL_COA_DEHYDROGENASE_ACTIVITY	0.400273	<2E-16	MF33	Positive
CRTAC1	GO_TRIGLYCERIDE_RICH_PLASMA_LIPOPROTEIN_PARTICLE	-0.136758	0.00571859	CC612	Negative	ATOH8	GO_OXIDOREDUCTASE_ACTIVITY_ACTING_ON_PAIRED_DONORS_WITH_INCORPORATION_OR_REDUCTION_OF_MOLECULAR_OXYGEN_REDUCED_FLAVIN_OR_FLAVOPROTEIN_AS_ONE_DONOR_AND_INCORPORATION_OF_ONE_ATOM_OF_OXYGEN	0.458629	<2E-16	MF628	Positive
CRTAC1	GO_NUCLEAR_HETEROCHROMATIN	-0.130834	0.00822394	CC389	Negative	ATOH8	GO_CALCIUM_DEPENDENT_CYSTEINE_TYPE_ENDOPEPTIDASE_ACTIVITY	0.463984	<2E-16	MF121	Positive
CRTAC1	GO_NADH_DEHYDROGENASE_COMPLEX	0.295436	1.22e-09	CC370	Positive	ATOH8	GO_CHAPERONE_BINDING	-0.392979	2.22e-16	MF169	Negative
CRTAC1	GO_CYTOSOLIC_SMALL_RIBOSOMAL_SUBUNIT	0.316652	6.25e-11	CC155	Positive	ATOH8	GO_CALMODULIN_BINDING	-0.390025	4.44e-16	MF129	Negative
CRTAC1	GO_SWR1_COMPLEX	0.110219	0.0261802	CC574	Positive	ATOH8	GO_OPSONIN_BINDING	-0.389989	4.44e-16	MF605	Negative
CRTAC1	GO_BETA_CATENIN_TCF_COMPLEX	0.0107671	0.828555	CC49	Positive	ATOH8	GO_CARBON_NITROGEN_LYASE_ACTIVITY	-0.37932	2.22e-15	MF142	Negative
CRTAC1	GO_SIN3_COMPLEX	0.231794	2.29e-06	CC540	Positive	ATOH8	GO_INTRAMOLECULAR_TRANSFERASE_ACTIVITY_PHOSPHOTRANSFERASES	-0.377057	3.33e-15	MF426	Negative
CRTAC1	GO_FIBRILLAR_COLLAGEN_TRIMER	-0.388365	4.44e-16	CC220	Negative	ATOH8	GO_SNAP_RECEPTOR_ACTIVITY	-0.375156	4.88e-15	MF874	Negative
CRTAC1	GO_CAVEOLA	-0.233159	1.98e-06	CC66	Negative	ATOH8	GO_CHEMOKINE_RECEPTOR_BINDING	-0.374482	5.33e-15	MF173	Negative
CRTAC1	GO_WNT_SIGNALOSOME	-0.252607	2.41e-07	CC630	Negative	ATOH8	GO_QUATERNARY_AMMONIUM_GROUP_BINDING	-0.37339	6.66e-15	MF789	Negative
CRTAC1	GO_SPINDLE_MICROTUBULE	-0.33286	5.5e-12	CC564	Negative	ATOH8	GO_LIPASE_INHIBITOR_ACTIVITY	-0.372043	8.44e-15	MF462	Negative
CRTAC1	GO_INTRINSIC_COMPONENT_OF_EXTERNAL_SIDE_OF_PLASMA_MEMBRANE	-0.363372	3.77e-14	CC280	Negative	ATOH8	GO_PHOSPHOLIPASE_INHIBITOR_ACTIVITY	-0.370857	1.02e-14	MF704	Negative
CRTAC1	GO_FILOPODIUM_TIP	-0.107043	0.0308447	CC226	Negative	ATOH8	GO_ASPARTIC_TYPE_PEPTIDASE_ACTIVITY	0.370119	1.15e-14	MF82	Positive
CRTAC1	GO_HETEROCHROMATIN	-0.261001	9.18e-08	CC251	Negative	ATOH8	GO_CHEMOKINE_ACTIVITY	-0.369705	1.24e-14	MF171	Negative
CRTAC1	GO_RNA_CAP_BINDING_COMPLEX	-0.211908	1.63e-05	CC512	Negative	ATOH8	GO_GROWTH_FACTOR_RECEPTOR_BINDING	-0.366901	2.04e-14	MF351	Negative
CRTAC1	GO_PARALLEL_FIBER_TO_PURKINJE_CELL_SYNAPSE	-0.210175	1.91e-05	CC419	Negative	ATOH8	GO_GTPASE_ACTIVATING_PROTEIN_BINDING	-0.366682	2.13e-14	MF354	Negative
CRTAC1	GO_INTERSTITIAL_MATRIX	-0.335183	3.84e-12	CC276	Negative	ATOH8	GO_INTRAMOLECULAR_TRANSFERASE_ACTIVITY	-0.364739	2.98e-14	MF425	Negative
CRTAC1	GO_CYTOSOLIC_LARGE_RIBOSOMAL_SUBUNIT	0.301885	5.06e-10	CC153	Positive	ATOH8	GO_PROTEOGLYCAN_BINDING	-0.364372	3.18e-14	MF780	Negative
CRTAC1	GO_ACTIN_CYTOSKELETON	-0.304545	3.5e-10	CC9	Negative	ATOH8	GO_AMIDE_BINDING	-0.362563	4.35e-14	MF54	Negative
CRTAC1	GO_RIBONUCLEASE_P_COMPLEX	0.0494222	0.319932	CC508	Positive	ATOH8	GO_ZINC_ION_TRANSMEMBRANE_TRANSPORTER_ACTIVITY	-0.361684	5.06e-14	MF1027	Negative
CRTAC1	GO_LUMENAL_SIDE_OF_ENDOPLASMIC_RETICULUM_MEMBRANE	-0.268653	3.7e-08	CC314	Negative	ATOH8	GO_ANNEALING_ACTIVITY	-0.361092	5.6e-14	MF72	Negative
CRTAC1	GO_TRANSCRIPTION_FACTOR_COMPLEX	-0.0896329	0.0708635	CC599	Negative	ATOH8	GO_HISTONE_KINASE_ACTIVITY	-0.361031	5.64e-14	MF378	Negative
CRTAC1	GO_MHC_PROTEIN_COMPLEX	-0.274624	1.78e-08	CC331	Negative	ATOH8	GO_MHC_CLASS_I_PROTEIN_BINDING	-0.359267	7.62e-14	MF508	Negative
CRTAC1	GO_MITOCHONDRIAL_MATRIX	0.189779	0.000117188	CC347	Positive	ATOH8	GO_RAC_GTPASE_BINDING	-0.357625	1.01e-13	MF795	Negative
CRTAC1	GO_SYNAPTIC_VESICLE_MEMBRANE	-0.0331671	0.504615	CC578	Negative	ATOH8	GO_SULFATE_TRANSMEMBRANE_TRANSPORTER_ACTIVITY	0.356903	1.14e-13	MF914	Positive
CRTAC1	GO_INVADOPODIUM	-0.420017	<2E-16	CC295	Negative	ATOH8	GO_SH3_DOMAIN_BINDING	-0.355822	1.36e-13	MF861	Negative
CRTAC1	GO_INTRINSIC_COMPONENT_OF_SYNAPTIC_MEMBRANE	-0.180412	0.000253656	CC293	Negative	ATOH8	GO_CXCR_CHEMOKINE_RECEPTOR_BINDING	-0.355206	1.51e-13	MF197	Negative
CRTAC1	GO_GAP_JUNCTION	-0.160383	0.00116754	CC232	Negative	ATOH8	GO_IGG_BINDING	-0.354854	1.6e-13	MF403	Negative
CRTAC1	GO_MITOCHONDRIA_ASSOCIATED_ENDOPLASMIC_RETICULUM_MEMBRANE	-0.0736552	0.137973	CC345	Negative	ATOH8	GO_PROTEIN_DISULFIDE_ISOMERASE_ACTIVITY	-0.354326	1.75e-13	MF748	Negative
CRTAC1	GO_MAIN_AXON	-0.279468	9.73e-09	CC318	Negative	ATOH8	GO_3_5_DNA_HELICASE_ACTIVITY	-0.353499	2.01e-13	MF9	Negative
CRTAC1	GO_NUCLEAR_MATRIX	-0.16283	0.000977625	CC393	Negative	ATOH8	GO_MHC_PROTEIN_BINDING	-0.35328	2.08e-13	MF510	Negative
CRTAC1	GO_DENDRITIC_SPINE_HEAD	-0.057332	0.248491	CC160	Negative	ATOH8	GO_NUCLEAR_EXPORT_SIGNAL_RECEPTOR_ACTIVITY	-0.352627	2.32e-13	MF574	Negative
CRTAC1	GO_CYTOPLASMIC_MICROTUBULE	-0.196944	6.33e-05	CC147	Negative	ATOH8	GO_PLATELET_DERIVED_GROWTH_FACTOR_BINDING	-0.351508	2.79e-13	MF717	Negative
CRTAC1	GO_CELL_LEADING_EDGE	-0.249301	3.49e-07	CC75	Negative	ATOH8	GO_KINESIN_BINDING	-0.350339	3.39e-13	MF443	Negative
CRTAC1	GO_OXIDOREDUCTASE_COMPLEX	0.242327	7.51e-07	CC416	Positive	ATOH8	GO_CCR_CHEMOKINE_RECEPTOR_BINDING	-0.349589	3.83e-13	MF162	Negative
CRTAC1	GO_CAMP_DEPENDENT_PROTEIN_KINASE_COMPLEX	-0.112436	0.0232962	CC59	Negative	ATOH8	GO_CELL_ADHESION_MOLECULE_BINDING	-0.349564	3.85e-13	MF164	Negative
CRTAC1	GO_ANCHORED_COMPONENT_OF_EXTERNAL_SIDE_OF_PLASMA_MEMBRANE	-0.323545	2.26e-11	CC18	Negative	ATOH8	GO_CYSTEINE_TYPE_ENDOPEPTIDASE_INHIBITOR_ACTIVITY_INVOLVED_IN_APOPTOTIC_PROCESS	-0.349526	3.87e-13	MF213	Negative
CRTAC1	GO_CELL_BODY_MEMBRANE	-0.118524	0.0167466	CC69	Negative	ATOH8	GO_G_PROTEIN_COUPLED_RECEPTOR_BINDING	-0.34939	3.96e-13	MF322	Negative
CRTAC1	GO_SPINDLE_POLE	-0.343898	9.65e-13	CC566	Negative	ATOH8	GO_CARBOHYDRATE_KINASE_ACTIVITY	-0.348987	4.23e-13	MF137	Negative
CRTAC1	GO_PHOTORECEPTOR_CONNECTING_CILIUM	0.0368673	0.458248	CC434	Positive	ATOH8	GO_ATP_DEPENDENT_MICROTUBULE_MOTOR_ACTIVITY_PLUS_END_DIRECTED	-0.347457	5.43e-13	MF85	Negative
CRTAC1	GO_HAPTOGLOBIN_HEMOGLOBIN_COMPLEX	0.0559213	0.260343	CC249	Positive	ATOH8	GO_TRANSFORMING_GROWTH_FACTOR_BETA_RECEPTOR_CYTOPLASMIC_MEDIATOR_ACTIVITY	0.347027	5.82e-13	MF960	Positive
CRTAC1	GO_DENDRITE_TERMINUS	0.00142298	0.977168	CC158	Positive	ATOH8	GO_EXTRACELLULAR_MATRIX_STRUCTURAL_CONSTITUENT_CONFERRING_TENSILE_STRENGTH	-0.343661	1e-12	MF296	Negative
CRTAC1	GO_JUXTAPARANODE_REGION_OF_AXON	-0.172781	0.000462877	CC297	Negative	ATOH8	GO_ACTIN_DEPENDENT_ATPASE_ACTIVITY	-0.343129	1.09e-12	MF25	Negative
CRTAC1	GO_MCM_COMPLEX	-0.267584	4.21e-08	CC322	Negative	ATOH8	GO_WIDE_PORE_CHANNEL_ACTIVITY	-0.342542	1.2e-12	MF1022	Negative
CRTAC1	GO_COLLAGEN_CONTAINING_EXTRACELLULAR_MATRIX	-0.309757	1.68e-10	CC115	Negative	ATOH8	GO_RECEPTOR_SERINE_THREONINE_KINASE_BINDING	0.338926	2.13e-12	MF805	Positive
CRTAC1	GO_SITE_OF_DOUBLE_STRAND_BREAK	-0.346059	6.81e-13	CC543	Negative	ATOH8	GO_ADP_BINDING	-0.337309	2.75e-12	MF40	Negative
CRTAC1	GO_RNA_POLYMERASE_COMPLEX	-0.0481263	0.332801	CC513	Negative	ATOH8	GO_HIGH_DENSITY_LIPOPROTEIN_PARTICLE_BINDING	-0.336581	3.08e-12	MF369	Negative
CRTAC1	GO_STEREOCILIUM_BUNDLE	0.127804	0.00985106	CC571	Positive	ATOH8	GO_OXIDOREDUCTASE_ACTIVITY_ACTING_ON_NAD_P_H_QUINONE_OR_SIMILAR_COMPOUND_AS_ACCEPTOR	0.336331	3.21e-12	MF625	Positive
CRTAC1	GO_MOTILE_CILIUM	0.101091	0.0415113	CC357	Positive	ATOH8	GO_CYTOKINE_ACTIVITY	-0.334847	4.04e-12	MF217	Negative
CRTAC1	GO_POSTSYNAPTIC_ENDOCYTIC_ZONE	-0.234353	1.75e-06	CC459	Negative	ATOH8	GO_WATER_TRANSMEMBRANE_TRANSPORTER_ACTIVITY	0.332836	5.52e-12	MF1021	Positive
CRTAC1	GO_TERTIARY_GRANULE	-0.367035	2e-14	CC585	Negative	ATOH8	GO_STRUCTURAL_CONSTITUENT_OF_NUCLEAR_PORE	-0.332174	6.11e-12	MF907	Negative
CRTAC1	GO_DNA_REPAIR_COMPLEX	-0.0111788	0.822105	CC169	Negative	ATOH8	GO_HYDROLASE_ACTIVITY_ACTING_ON_CARBON_NITROGEN_BUT_NOT_PEPTIDE_BONDS_IN_CYCLIC_AMIDES	-0.331861	6.42e-12	MF393	Negative
CRTAC1	GO_GAMMA_TUBULIN_COMPLEX	-0.10663	0.0314994	CC231	Negative	ATOH8	GO_PROTEIN_PHOSPHATASE_2A_BINDING	-0.330798	7.55e-12	MF764	Negative
CRTAC1	GO_HISTONE_DEACETYLASE_COMPLEX	0.163188	0.000952359	CC255	Positive	ATOH8	GO_DOUBLE_STRANDED_RNA_BINDING	-0.33046	7.95e-12	MF256	Negative
CRTAC1	GO_NUCLEAR_INNER_MEMBRANE	-0.137676	0.00539869	CC391	Negative	ATOH8	GO_ENDOPEPTIDASE_ACTIVITY	-0.327558	1.24e-11	MF273	Negative
CRTAC1	GO_INTRINSIC_COMPONENT_OF_PRESYNAPTIC_MEMBRANE	-0.161686	0.00106257	CC292	Negative	ATOH8	GO_FATTY_ACID_LIGASE_ACTIVITY	0.327395	1.27e-11	MF300	Positive
CRTAC1	GO_MEMBRANE_REGION	-0.321526	3.06e-11	CC327	Negative	ATOH8	GO_MICROTUBULE_MOTOR_ACTIVITY	-0.326624	1.43e-11	MF515	Negative
CRTAC1	GO_TOR_COMPLEX	-0.0927154	0.0616594	CC591	Negative	ATOH8	GO_PHOSPHATIDYLINOSITOL_3_4_5_TRISPHOSPHATE_BINDING	-0.32515	1.78e-11	MF677	Negative
CRTAC1	GO_PERINUCLEAR_ENDOPLASMIC_RETICULUM	-0.0799541	0.10726	CC426	Negative	ATOH8	GO_PROTEIN_TYROSINE_KINASE_ACTIVATOR_ACTIVITY	-0.325134	1.78e-11	MF775	Negative
CRTAC1	GO_CELL_CELL_JUNCTION	-0.231332	2.4e-06	CC71	Negative	ATOH8	GO_SINGLE_STRANDED_DNA_BINDING	-0.324108	2.08e-11	MF867	Negative
CRTAC1	GO_DNA_PACKAGING_COMPLEX	-0.240224	9.42e-07	CC167	Negative	ATOH8	GO_METALLOPEPTIDASE_ACTIVITY	-0.323878	2.15e-11	MF505	Negative
CRTAC1	GO_PROTEIN_LIPID_COMPLEX	-0.299341	7.17e-10	CC486	Negative	ATOH8	GO_INTEGRIN_BINDING	-0.32256	2.62e-11	MF417	Negative
CRTAC1	GO_NEURON_PROJECTION_TERMINUS	-0.323101	2.42e-11	CC376	Negative	ATOH8	GO_FIBRONECTIN_BINDING	-0.319633	4.04e-11	MF307	Negative
CRTAC1	GO_GERM_CELL_NUCLEUS	-0.235761	1.51e-06	CC234	Negative	ATOH8	GO_GUANYL_NUCLEOTIDE_BINDING	-0.319201	4.31e-11	MF358	Negative
CRTAC1	GO_TERTIARY_GRANULE_MEMBRANE	-0.390528	4.44e-16	CC587	Negative	ATOH8	GO_GDP_DISSOCIATION_INHIBITOR_ACTIVITY	-0.318541	4.75e-11	MF333	Negative
CRTAC1	GO_CELL_CORTEX	-0.221172	6.66e-06	CC72	Negative	ATOH8	GO_KINASE_ACTIVATOR_ACTIVITY	-0.318215	4.98e-11	MF440	Negative
CRTAC1	GO_NUCLEAR_REPLICATION_FORK	-0.318604	4.7e-11	CC400	Negative	ATOH8	GO_GLYCOLIPID_BINDING	-0.316557	6.34e-11	MF347	Negative
CRTAC1	GO_SODIUM_POTASSIUM_EXCHANGING_ATPASE_COMPLEX	0.0757733	0.126969	CC555	Positive	ATOH8	GO_PHOSPHOTYROSINE_RESIDUE_BINDING	-0.316211	6.67e-11	MF715	Negative
CRTAC1	GO_AXON_INITIAL_SEGMENT	-0.321149	3.23e-11	CC38	Negative	ATOH8	GO_TRANSITION_METAL_ION_TRANSMEMBRANE_TRANSPORTER_ACTIVITY	-0.314853	8.12e-11	MF961	Negative
CRTAC1	GO_TIM23_MITOCHONDRIAL_IMPORT_INNER_MEMBRANE_TRANSLOCASE_COMPLEX	0.0928777	0.0612036	CC590	Positive	ATOH8	GO_CYSTEINE_TYPE_ENDOPEPTIDASE_INHIBITOR_ACTIVITY	-0.314793	8.19e-11	MF212	Negative
CRTAC1	GO_SYMMETRIC_SYNAPSE	0.0922173	0.0630762	CC575	Positive	ATOH8	GO_CYTOKINE_RECEPTOR_BINDING	-0.314619	8.4e-11	MF220	Negative
CRTAC1	GO_SCHAFFER_COLLATERAL_CA1_SYNAPSE	-0.181146	0.000239091	CC531	Negative	ATOH8	GO_POTASSIUM_CHANNEL_REGULATOR_ACTIVITY	-0.314438	8.62e-11	MF728	Negative
CRTAC1	GO_GOLGI_STACK	-0.0485706	0.328353	CC244	Negative	ATOH8	GO_PROFILIN_BINDING	-0.313855	9.38e-11	MF737	Negative
CRTAC1	GO_PHOTORECEPTOR_DISC_MEMBRANE	-0.16133	0.00109035	CC435	Negative	ATOH8	GO_APOLIPOPROTEIN_BINDING	-0.312988	1.06e-10	MF76	Negative
CRTAC1	GO_TRANSCRIPTION_FACTOR_TFIID_COMPLEX	-0.097708	0.0488571	CC600	Negative	ATOH8	GO_ACID_THIOL_LIGASE_ACTIVITY	0.31251	1.14e-10	MF23	Positive
CRTAC1	GO_ROUGH_ENDOPLASMIC_RETICULUM_MEMBRANE	0.010358	0.834973	CC522	Positive	ATOH8	GO_RACEMASE_AND_EPIMERASE_ACTIVITY_ACTING_ON_CARBOHYDRATES_AND_DERIVATIVES	-0.311966	1.23e-10	MF798	Negative
CRTAC1	GO_MITOCHONDRIAL_SMALL_RIBOSOMAL_SUBUNIT	0.0449299	0.365945	CC350	Positive	ATOH8	GO_ADENYLATE_CYCLASE_BINDING	-0.311834	1.25e-10	MF38	Negative
CRTAC1	GO_SAGA_TYPE_COMPLEX	0.104404	0.035243	CC526	Positive	ATOH8	GO_ISOMERASE_ACTIVITY	-0.309844	1.66e-10	MF437	Negative
CRTAC1	GO_AUTOPHAGOSOME_MEMBRANE	-0.182483	0.000214528	CC35	Negative	ATOH8	GO_TETRAPYRROLE_BINDING	0.309493	1.75e-10	MF934	Positive
CRTAC1	GO_NUCLEAR_PORE_NUCLEAR_BASKET	-0.25233	2.49e-07	CC398	Negative	ATOH8	GO_CYCLIN_DEPENDENT_PROTEIN_KINASE_ACTIVITY	-0.309244	1.81e-10	MF204	Negative
CRTAC1	GO_NUCLEAR_INCLUSION_BODY	-0.0398193	0.423033	CC390	Negative	ATOH8	GO_PALMITOYL_PROTEIN_HYDROLASE_ACTIVITY	0.308762	1.94e-10	MF645	Positive
CRTAC1	GO_RESPIRASOME	0.310658	1.48e-10	CC502	Positive	ATOH8	GO_CHANNEL_INHIBITOR_ACTIVITY	-0.308601	1.98e-10	MF167	Negative
CRTAC1	GO_BLOC_COMPLEX	0.0741845	0.135157	CC51	Positive	ATOH8	GO_DNA_REPLICATION_ORIGIN_BINDING	-0.308178	2.11e-10	MF251	Negative
CRTAC1	GO_ENDOCYTIC_VESICLE_LUMEN	-0.288676	2.98e-09	CC178	Negative	ATOH8	GO_SPECTRIN_BINDING	-0.306712	2.59e-10	MF892	Negative
CRTAC1	GO_ENDOPLASMIC_RETICULUM_CHAPERONE_COMPLEX	-0.259726	1.07e-07	CC184	Negative	ATOH8	GO_GLUTATHIONE_TRANSFERASE_ACTIVITY	0.30667	2.6e-10	MF345	Positive
CRTAC1	GO_PHOSPHATASE_COMPLEX	-0.157018	0.00148438	CC432	Negative	ATOH8	GO_TUMOR_NECROSIS_FACTOR_RECEPTOR_BINDING	-0.305696	2.98e-10	MF986	Negative
CRTAC1	GO_MITOCHONDRIAL_PROTEIN_COMPLEX	0.186394	0.000155576	CC348	Positive	ATOH8	GO_HYALURONIC_ACID_BINDING	-0.305589	3.03e-10	MF389	Negative
CRTAC1	GO_ZYMOGEN_GRANULE	0.0999533	0.0438701	CC632	Positive	ATOH8	GO_ARACHIDONIC_ACID_MONOOXYGENASE_ACTIVITY	0.303898	3.83e-10	MF77	Positive
CRTAC1	GO_G_PROTEIN_BETA_GAMMA_SUBUNIT_COMPLEX	-0.390704	2.22e-16	CC228	Negative	ATOH8	GO_TOXIC_SUBSTANCE_BINDING	0.303332	4.14e-10	MF942	Positive
CRTAC1	GO_EUKARYOTIC_TRANSLATION_INITIATION_FACTOR_3_COMPLEX	0.0758382	0.126644	CC203	Positive	ATOH8	GO_G_PROTEIN_COUPLED_NUCLEOTIDE_RECEPTOR_ACTIVITY	-0.302939	4.38e-10	MF321	Negative
CRTAC1	GO_EARLY_ENDOSOME	-0.303203	4.22e-10	CC173	Negative	ATOH8	GO_MODIFIED_AMINO_ACID_BINDING	-0.302522	4.64e-10	MF525	Negative
CRTAC1	GO_MICROTUBULE_PLUS_END	-0.371424	9.33e-15	CC340	Negative	ATOH8	GO_AMINO_ACID_TRANSMEMBRANE_TRANSPORTER_ACTIVITY	-0.301446	5.38e-10	MF60	Negative
CRTAC1	GO_NUCLEAR_CHROMOSOME_TELOMERIC_REGION	-0.13654	0.00579691	CC384	Negative	ATOH8	GO_ARYLSULFATASE_ACTIVITY	-0.301279	5.5e-10	MF81	Negative
CRTAC1	GO_CELL_DIVISION_SITE	-0.326362	1.48e-11	CC74	Negative	ATOH8	GO_INTRACELLULAR_CALCIUM_ACTIVATED_CHLORIDE_CHANNEL_ACTIVITY	0.300599	6.04e-10	MF420	Positive
CRTAC1	GO_INTRINSIC_COMPONENT_OF_POSTSYNAPTIC_SPECIALIZATION_MEMBRANE	-0.122288	0.0135582	CC290	Negative	ATOH8	GO_ATPASE_ACTIVITY	-0.299975	6.58e-10	MF88	Negative
CRTAC1	GO_SMN_COMPLEX	-0.0193528	0.697081	CC550	Negative	ATOH8	GO_SUPEROXIDE_GENERATING_NADPH_OXIDASE_ACTIVATOR_ACTIVITY	-0.298734	7.79e-10	MF922	Negative
CRTAC1	GO_M_BAND	-0.0155972	0.753739	CC317	Negative	ATOH8	GO_NUCLEOTIDE_RECEPTOR_ACTIVITY	-0.298637	7.89e-10	MF593	Negative
CRTAC1	GO_INTRINSIC_COMPONENT_OF_POSTSYNAPTIC_DENSITY_MEMBRANE	-0.0705234	0.155565	CC288	Negative	ATOH8	GO_NADH_DEHYDROGENASE_ACTIVITY	0.297421	9.31e-10	MF550	Positive
CRTAC1	GO_TRANSCRIPTION_FACTOR_TFTC_COMPLEX	0.00554158	0.911256	CC602	Positive	ATOH8	GO_OXALATE_TRANSMEMBRANE_TRANSPORTER_ACTIVITY	0.297387	9.35e-10	MF614	Positive
CRTAC1	GO_ENDONUCLEASE_COMPLEX	0.0444062	0.371564	CC182	Positive	ATOH8	GO_FERRIC_IRON_BINDING	-0.296944	9.93e-10	MF303	Negative
CRTAC1	GO_MICROVILLUS_MEMBRANE	-0.178315	0.000299968	CC342	Negative	ATOH8	GO_G_PROTEIN_BETA_GAMMA_SUBUNIT_COMPLEX_BINDING	-0.296676	1.03e-09	MF316	Negative
CRTAC1	GO_ENDOCYTIC_VESICLE	-0.354172	1.79e-13	CC177	Negative	ATOH8	GO_NUCLEAR_LOCALIZATION_SEQUENCE_BINDING	-0.2952	1.26e-09	MF577	Negative
CRTAC1	GO_MRNA_CLEAVAGE_FACTOR_COMPLEX	-0.0758938	0.126365	CC359	Negative	ATOH8	GO_AMYLOID_BETA_BINDING	-0.29483	1.32e-09	MF65	Negative
CRTAC1	GO_RNA_POLYMERASE_III_TRANSCRIPTION_FACTOR_COMPLEX	-0.0121801	0.806473	CC519	Negative	ATOH8	GO_SULFURTRANSFERASE_ACTIVITY	0.292455	1.81e-09	MF919	Positive
CRTAC1	GO_PLASMA_MEMBRANE_SIGNALING_RECEPTOR_COMPLEX	-0.292206	1.87e-09	CC442	Negative	ATOH8	GO_RAGE_RECEPTOR_BINDING	-0.291162	2.15e-09	MF799	Negative
CRTAC1	GO_ORGANELLE_INNER_MEMBRANE	0.155745	0.00162363	CC411	Positive	ATOH8	GO_PROTEIN_N_TERMINUS_BINDING	-0.289584	2.65e-09	MF762	Negative
CRTAC1	GO_SODIUM_CHANNEL_COMPLEX	0.108313	0.0289008	CC554	Positive	ATOH8	GO_DNA_HELICASE_ACTIVITY	-0.289549	2.66e-09	MF247	Negative
CRTAC1	GO_DNA_REPLICATION_FACTOR_A_COMPLEX	-0.25882	1.18e-07	CC170	Negative	ATOH8	GO_OXIDOREDUCTASE_ACTIVITY_ACTING_ON_NAD_P_H_OXYGEN_AS_ACCEPTOR	-0.289491	2.68e-09	MF624	Negative
CRTAC1	GO_PERICENTRIC_HETEROCHROMATIN	-0.372714	7.33e-15	CC423	Negative	ATOH8	GO_TROPOMYOSIN_BINDING	-0.288804	2.93e-09	MF984	Negative
CRTAC1	GO_ACROSOMAL_MEMBRANE	-0.138155	0.00523829	CC6	Negative	ATOH8	GO_CYTOKINE_RECEPTOR_ACTIVITY	-0.287344	3.55e-09	MF219	Negative
CRTAC1	GO_LAMININ_COMPLEX	-0.10632	0.0319994	CC305	Negative	ATOH8	GO_MONOCARBOXYLIC_ACID_BINDING	0.287276	3.58e-09	MF529	Positive
CRTAC1	GO_CATION_TRANSPORTING_ATPASE_COMPLEX	0.0800088	0.107019	CC65	Positive	ATOH8	GO_CYSTEINE_TYPE_ENDOPEPTIDASE_REGULATOR_ACTIVITY_INVOLVED_IN_APOPTOTIC_PROCESS	-0.286124	4.15e-09	MF214	Negative
CRTAC1	GO_NBAF_COMPLEX	0.253818	2.1e-07	CC372	Positive	ATOH8	GO_CORECEPTOR_ACTIVITY	-0.285828	4.32e-09	MF195	Negative
CRTAC1	GO_TRANSCRIPTION_EXPORT_COMPLEX	0.170161	0.000565811	CC598	Positive	ATOH8	GO_HYDROLASE_ACTIVITY_ACTING_ON_CARBON_NITROGEN_BUT_NOT_PEPTIDE_BONDS_IN_LINEAR_AMIDES	0.284854	4.9e-09	MF395	Positive
CRTAC1	GO_UNCONVENTIONAL_MYOSIN_COMPLEX	-0.279427	9.78e-09	CC621	Negative	ATOH8	GO_FOUR_WAY_JUNCTION_DNA_BINDING	-0.283818	5.59e-09	MF312	Negative
CRTAC1	GO_ENDOSOME_LUMEN	-0.292811	1.73e-09	CC193	Negative	ATOH8	GO_PEPTIDE_ANTIGEN_BINDING	-0.282819	6.36e-09	MF654	Negative
CRTAC1	GO_VOLTAGE_GATED_CALCIUM_CHANNEL_COMPLEX	0.131811	0.00775337	CC628	Positive	ATOH8	GO_GAMMA_CATENIN_BINDING	-0.282431	6.68e-09	MF328	Negative
CRTAC1	GO_INTRINSIC_COMPONENT_OF_POSTSYNAPTIC_MEMBRANE	-0.190034	0.000114695	CC289	Negative	ATOH8	GO_CALCIUM_DEPENDENT_PROTEIN_KINASE_ACTIVITY	-0.282064	7e-09	MF125	Negative
CRTAC1	GO_SITE_OF_DNA_DAMAGE	-0.339158	2.06e-12	CC542	Negative	ATOH8	GO_TELOMERASE_RNA_BINDING	-0.281811	7.23e-09	MF932	Negative
CRTAC1	GO_PROTEIN_KINASE_COMPLEX	-0.206326	2.73e-05	CC485	Negative	ATOH8	GO_HSP70_PROTEIN_BINDING	-0.280383	8.67e-09	MF387	Negative
CRTAC1	GO_SMALL_RIBOSOMAL_SUBUNIT	0.248828	3.68e-07	CC548	Positive	ATOH8	GO_PHOSPHATIDYLINOSITOL_3_KINASE_ACTIVITY	-0.278189	1.14e-08	MF680	Negative
CRTAC1	GO_PROTEIN_PHOSPHATASE_TYPE_2A_COMPLEX	-0.132822	0.00729137	CC488	Negative	ATOH8	GO_GAP_JUNCTION_CHANNEL_ACTIVITY	-0.277933	1.18e-08	MF330	Negative
CRTAC1	GO_XY_BODY	-0.107891	0.0295343	CC631	Negative	ATOH8	GO_AMMONIUM_ION_BINDING	-0.277617	1.23e-08	MF62	Negative
CRTAC1	GO_CONNEXIN_COMPLEX	-0.0810939	0.102328	CC125	Negative	ATOH8	GO_NUCLEOTIDYLTRANSFERASE_ACTIVITY	-0.27706	1.32e-08	MF596	Negative
CRTAC1	GO_SMN_SM_PROTEIN_COMPLEX	0.0255401	0.607426	CC551	Positive	ATOH8	GO_CATION_CHLORIDE_SYMPORTER_ACTIVITY	-0.276537	1.41e-08	MF161	Negative
CRTAC1	GO_RIBBON_SYNAPSE	0.0580074	0.242953	CC507	Positive	ATOH8	GO_LOW_DENSITY_LIPOPROTEIN_PARTICLE_RECEPTOR_ACTIVITY	-0.276088	1.49e-08	MF473	Negative
CRTAC1	GO_PRERIBOSOME_SMALL_SUBUNIT_PRECURSOR	-0.165117	0.000826241	CC469	Negative	ATOH8	GO_ANTIGEN_BINDING	-0.276031	1.5e-08	MF73	Negative
CRTAC1	GO_SPECIFIC_GRANULE_MEMBRANE	-0.343424	1.04e-12	CC559	Negative	ATOH8	GO_MONOOXYGENASE_ACTIVITY	0.275429	1.61e-08	MF531	Positive
CRTAC1	GO_PHOTORECEPTOR_OUTER_SEGMENT_MEMBRANE	0.139442	0.00482828	CC438	Positive	ATOH8	GO_MISFOLDED_PROTEIN_BINDING	-0.275334	1.63e-08	MF518	Negative
CRTAC1	GO_APICAL_DENDRITE	-0.318685	4.65e-11	CC24	Negative	ATOH8	GO_PHOSPHATIDYLSERINE_BINDING	-0.275324	1.63e-08	MF698	Negative
CRTAC1	GO_CLATHRIN_COAT_OF_ENDOCYTIC_VESICLE	-0.270619	2.91e-08	CC102	Negative	ATOH8	GO_CARGO_RECEPTOR_ACTIVITY	-0.273563	2.03e-08	MF151	Negative
CRTAC1	GO_T_TUBULE	-0.158677	0.00131949	CC581	Negative	ATOH8	GO_DEACETYLASE_ACTIVITY	0.273368	2.08e-08	MF223	Positive
CRTAC1	GO_PROTEIN_PHOSPHATASE_TYPE_1_COMPLEX	-0.0272717	0.583284	CC487	Negative	ATOH8	GO_LIGAND_GATED_SODIUM_CHANNEL_ACTIVITY	0.272639	2.28e-08	MF455	Positive
CRTAC1	GO_NUCLEOTIDE_EXCISION_REPAIR_COMPLEX	-0.184252	0.000185668	CC406	Negative	ATOH8	GO_OXIDOREDUCTASE_ACTIVITY_ACTING_ON_CH_OH_GROUP_OF_DONORS	0.271902	2.49e-08	MF619	Positive
CRTAC1	GO_EXORIBONUCLEASE_COMPLEX	0.0324887	0.513375	CC209	Positive	ATOH8	GO_BASIC_AMINO_ACID_TRANSMEMBRANE_TRANSPORTER_ACTIVITY	-0.27137	2.66e-08	MF97	Negative
CRTAC1	GO_PRESPLICEOSOME	0.343744	9.9e-13	CC470	Positive	ATOH8	GO_THREONINE_TYPE_PEPTIDASE_ACTIVITY	-0.271009	2.78e-08	MF938	Negative
CRTAC1	GO_L_TYPE_VOLTAGE_GATED_CALCIUM_CHANNEL_COMPLEX	0.00535915	0.914166	CC301	Positive	ATOH8	GO_CALCIUM_CHANNEL_INHIBITOR_ACTIVITY	-0.27082	2.84e-08	MF119	Negative
CRTAC1	GO_COATED_VESICLE_MEMBRANE	-0.401733	<2E-16	CC113	Negative	ATOH8	GO_FOLIC_ACID_BINDING	-0.270743	2.87e-08	MF311	Negative
CRTAC1	GO_MITOCHONDRIAL_RESPIRATORY_CHAIN_COMPLEX_IV	0.286871	3.77e-09	CC349	Positive	ATOH8	GO_TRANSLATION_INITIATION_FACTOR_BINDING	-0.269245	3.44e-08	MF966	Negative
CRTAC1	GO_GOLGI_TRANSPORT_COMPLEX	0.194781	7.64e-05	CC245	Positive	ATOH8	GO_NAD_DEPENDENT_PROTEIN_DEACETYLASE_ACTIVITY	0.269255	3.44e-08	MF549	Positive
CRTAC1	GO_PROTEIN_COMPLEX_INVOLVED_IN_CELL_ADHESION	-0.399794	<2E-16	CC483	Negative	ATOH8	GO_NEUROTRANSMITTER_SODIUM_SYMPORTER_ACTIVITY	-0.268584	3.73e-08	MF567	Negative
CRTAC1	GO_MEDIATOR_COMPLEX	-0.0697224	0.160325	CC323	Negative	ATOH8	GO_ACYL_COA_LIGASE_ACTIVITY	0.268094	3.96e-08	MF34	Positive
CRTAC1	GO_PRERIBOSOME	-0.0481115	0.33295	CC467	Negative	ATOH8	GO_5S_RRNA_BINDING	0.266589	4.74e-08	MF14	Positive
CRTAC1	GO_NADPH_OXIDASE_COMPLEX	-0.232412	2.14e-06	CC371	Negative	ATOH8	GO_PROLINE_RICH_REGION_BINDING	-0.26472	5.92e-08	MF738	Negative
CRTAC1	GO_INTRINSIC_COMPONENT_OF_SYNAPTIC_VESICLE_MEMBRANE	0.183403	0.000199038	CC294	Positive	ATOH8	GO_PROTEIN_TYROSINE_KINASE_BINDING	-0.264035	6.42e-08	MF777	Negative
CRTAC1	GO_NEUROMUSCULAR_JUNCTION	-0.240413	9.23e-07	CC373	Negative	ATOH8	GO_DNA_DEPENDENT_ATPASE_ACTIVITY	-0.263355	6.96e-08	MF245	Negative
CRTAC1	GO_RECEPTOR_COMPLEX	-0.302711	4.52e-10	CC496	Negative	ATOH8	GO_ION_CHANNEL_BINDING	-0.262358	7.83e-08	MF429	Negative
CRTAC1	GO_HOPS_COMPLEX	0.125416	0.0113288	CC257	Positive	ATOH8	GO_MONOSACCHARIDE_BINDING	-0.262259	7.92e-08	MF532	Negative
CRTAC1	GO_ANCHORED_COMPONENT_OF_MEMBRANE	-0.285491	4.51e-09	CC19	Negative	ATOH8	GO_ENZYME_INHIBITOR_ACTIVITY	-0.261917	8.25e-08	MF277	Negative
CRTAC1	GO_GOLGI_ASSOCIATED_VESICLE_MEMBRANE	-0.375487	4.44e-15	CC239	Negative	ATOH8	GO_O_METHYLTRANSFERASE_ACTIVITY	0.261812	8.35e-08	MF598	Positive
CRTAC1	GO_PLASMA_MEMBRANE_RAFT	-0.270422	2.98e-08	CC441	Negative	ATOH8	GO_LIPASE_ACTIVATOR_ACTIVITY	-0.261542	8.62e-08	MF460	Negative
CRTAC1	GO_KINETOCHORE	-0.334975	3.96e-12	CC300	Negative	ATOH8	GO_HELICASE_ACTIVITY	-0.261201	8.97e-08	MF363	Negative
CRTAC1	GO_RECYCLING_ENDOSOME	-0.102639	0.0384744	CC497	Negative	ATOH8	GO_DNA_POLYMERASE_BINDING	-0.260416	9.83e-08	MF250	Negative
CRTAC1	GO_PRERIBOSOME_LARGE_SUBUNIT_PRECURSOR	-0.103219	0.0373852	CC468	Negative	ATOH8	GO_PLATELET_DERIVED_GROWTH_FACTOR_RECEPTOR_BINDING	-0.259893	1.05e-07	MF718	Negative
CRTAC1	GO_ENDOPLASMIC_RETICULUM_TUBULAR_NETWORK	-0.0188513	0.704559	CC191	Negative	ATOH8	GO_AMP_BINDING	0.259557	1.09e-07	MF64	Positive
CRTAC1	GO_SITE_OF_POLARIZED_GROWTH	-0.270257	3.04e-08	CC544	Negative	ATOH8	GO_SOLUTE_CATION_ANTIPORTER_ACTIVITY	-0.259111	1.14e-07	MF887	Negative
CRTAC1	GO_PROTEASOME_REGULATORY_PARTICLE_BASE_SUBCOMPLEX	-0.400128	<2E-16	CC481	Negative	ATOH8	GO_GLUCOSE_BINDING	-0.258828	1.18e-07	MF337	Negative
CRTAC1	GO_NUCLEAR_TRANSCRIPTION_FACTOR_COMPLEX	-0.115652	0.0196037	CC402	Negative	ATOH8	GO_TRANSFERASE_ACTIVITY_TRANSFERRING_PENTOSYL_GROUPS	-0.2586	1.21e-07	MF955	Negative
CRTAC1	GO_FASCIA_ADHERENS	-0.252023	2.58e-07	CC218	Negative	ATOH8	GO_CHEMOKINE_BINDING	-0.257558	1.37e-07	MF172	Negative
CRTAC1	GO_ARP2_3_PROTEIN_COMPLEX	-0.128994	0.00918062	CC29	Negative	ATOH8	GO_TBP_CLASS_PROTEIN_BINDING	-0.257106	1.44e-07	MF931	Negative
CRTAC1	GO_TETRASPANIN_ENRICHED_MICRODOMAIN	-0.0539172	0.277841	CC588	Negative	ATOH8	GO_LONG_CHAIN_FATTY_ACID_TRANSPORTER_ACTIVITY	0.257104	1.44e-07	MF471	Positive
CRTAC1	GO_U2_SNRNP	0.048888	0.325197	CC615	Positive	ATOH8	GO_AMINO_ACID_CATION_SYMPORTER_ACTIVITY	-0.255721	1.69e-07	MF58	Negative
CRTAC1	GO_CATALYTIC_STEP_2_SPLICEOSOME	0.0354572	0.475631	CC62	Positive	ATOH8	GO_PEPTIDE_DISULFIDE_OXIDOREDUCTASE_ACTIVITY	-0.255604	1.71e-07	MF656	Negative
CRTAC1	GO_NUCLEAR_TRANSCRIPTIONAL_REPRESSOR_COMPLEX	0.0875448	0.0777142	CC403	Positive	ATOH8	GO_RAB_GUANYL_NUCLEOTIDE_EXCHANGE_FACTOR_ACTIVITY	-0.2555	1.74e-07	MF794	Negative
CRTAC1	GO_SYNAPTIC_CLEFT	-0.0551951	0.266593	CC576	Negative	ATOH8	GO_VASCULAR_ENDOTHELIAL_GROWTH_FACTOR_RECEPTOR_BINDING	-0.254069	2.04e-07	MF1005	Negative
CRTAC1	GO_MRNA_CLEAVAGE_AND_POLYADENYLATION_SPECIFICITY_FACTOR_COMPLEX	-0.172209	0.000483735	CC358	Negative	ATOH8	GO_PROTEIN_SERINE_THREONINE_KINASE_ACTIVITY	-0.253788	2.11e-07	MF770	Negative
CRTAC1	GO_POSTSYNAPTIC_MEMBRANE	-0.227991	3.37e-06	CC461	Negative	ATOH8	GO_PHOSPHATIDYLINOSITOL_PHOSPHATE_KINASE_ACTIVITY	-0.253765	2.11e-07	MF696	Negative
CRTAC1	GO_ADHERENS_JUNCTION	-0.091479	0.0652252	CC14	Negative	ATOH8	GO_TUMOR_NECROSIS_FACTOR_RECEPTOR_SUPERFAMILY_BINDING	-0.25228	2.5e-07	MF987	Negative
CRTAC1	GO_DYNEIN_COMPLEX	-0.0084279	0.865398	CC172	Negative	ATOH8	GO_VINCULIN_BINDING	-0.252102	2.55e-07	MF1006	Negative
CRTAC1	GO_TRANSFERASE_COMPLEX_TRANSFERRING_PHOSPHORUS_CONTAINING_GROUPS	-0.235224	1.6e-06	CC605	Negative	ATOH8	GO_ENDONUCLEASE_ACTIVITY	-0.251468	2.74e-07	MF270	Negative
CRTAC1	GO_CLEAVAGE_FURROW	-0.328927	1.01e-11	CC110	Negative	ATOH8	GO_CO_SMAD_BINDING	0.249959	3.25e-07	MF185	Positive
CRTAC1	GO_TRANS_GOLGI_NETWORK	-0.195583	7.13e-05	CC593	Negative	ATOH8	GO_DELAYED_RECTIFIER_POTASSIUM_CHANNEL_ACTIVITY	-0.249861	3.28e-07	MF228	Negative
CRTAC1	GO_CHYLOMICRON	-0.170763	0.000540451	CC90	Negative	ATOH8	GO_ACTIN_MONOMER_BINDING	-0.2484	3.86e-07	MF27	Negative
CRTAC1	GO_MULTIVESICULAR_BODY_MEMBRANE	0.08719	0.07893	CC362	Positive	ATOH8	GO_GROWTH_FACTOR_BINDING	-0.247551	4.24e-07	MF350	Negative
CRTAC1	GO_NPBAF_COMPLEX	0.265865	5.17e-08	CC383	Positive	ATOH8	GO_RRNA_BINDING	0.246848	4.59e-07	MF846	Positive
CRTAC1	GO_EXTRINSIC_COMPONENT_OF_MITOCHONDRIAL_INNER_MEMBRANE	0.281862	7.18e-09	CC214	Positive	ATOH8	GO_SUPEROXIDE_GENERATING_NADPH_OXIDASE_ACTIVITY	-0.246344	4.85e-07	MF923	Negative
CRTAC1	GO_VOLTAGE_GATED_SODIUM_CHANNEL_COMPLEX	0.0122932	0.804712	CC629	Positive	ATOH8	GO_OXIDOREDUCTASE_ACTIVITY_ACTING_ON_CH_OR_CH2_GROUPS	-0.245143	5.53e-07	MF620	Negative
CRTAC1	GO_APICAL_PLASMA_MEMBRANE	-0.111833	0.0240521	CC27	Negative	ATOH8	GO_CADHERIN_BINDING	-0.244111	6.19e-07	MF114	Negative
CRTAC1	GO_CARBOXY_TERMINAL_DOMAIN_PROTEIN_KINASE_COMPLEX	-0.00066615	0.98931	CC60	Negative	ATOH8	GO_EXTRACELLULAR_MATRIX_CONSTITUENT_CONFERRING_ELASTICITY	-0.243972	6.28e-07	MF293	Negative
CRTAC1	GO_INTRINSIC_COMPONENT_OF_ORGANELLE_MEMBRANE	-0.151257	0.00221539	CC286	Negative	ATOH8	GO_PEPTIDE_RECEPTOR_ACTIVITY	-0.243731	6.45e-07	MF660	Negative
CRTAC1	GO_NEURON_TO_NEURON_SYNAPSE	-0.131944	0.00769102	CC378	Negative	ATOH8	GO_HIGH_VOLTAGE_GATED_CALCIUM_CHANNEL_ACTIVITY	0.239525	1.01e-06	MF370	Positive
CRTAC1	GO_PRESYNAPTIC_MEMBRANE	-0.254274	2e-07	CC476	Negative	ATOH8	GO_CHEMOATTRACTANT_ACTIVITY	-0.238672	1.11e-06	MF170	Negative
CRTAC1	GO_EXON_EXON_JUNCTION_COMPLEX	0.0147393	0.766881	CC208	Positive	ATOH8	GO_OXIDOREDUCTASE_ACTIVITY_ACTING_ON_DIPHENOLS_AND_RELATED_SUBSTANCES_AS_DONORS	0.236808	1.35e-06	MF621	Positive
CRTAC1	GO_CILIARY_PLASM	-0.147069	0.00293886	CC94	Negative	ATOH8	GO_PHOSPHOLIPID_BINDING	-0.236534	1.39e-06	MF705	Negative
CRTAC1	GO_INTRINSIC_COMPONENT_OF_MITOCHONDRIAL_OUTER_MEMBRANE	0.19066	0.00010877	CC284	Positive	ATOH8	GO_BIOACTIVE_LIPID_RECEPTOR_ACTIVITY	-0.236132	1.45e-06	MF106	Negative
CRTAC1	GO_TRANSPORTER_COMPLEX	-0.164588	0.000859199	CC609	Negative	ATOH8	GO_SODIUM_CHANNEL_REGULATOR_ACTIVITY	-0.235569	1.54e-06	MF879	Negative
CRTAC1	GO_MEIOTIC_SPINDLE	-0.272192	2.4e-08	CC324	Negative	ATOH8	GO_CARBOXYLIC_ESTER_HYDROLASE_ACTIVITY	0.234693	1.69e-06	MF146	Positive
CRTAC1	GO_U2_TYPE_CATALYTIC_STEP_2_SPLICEOSOME	-0.0496571	0.317635	CC616	Negative	ATOH8	GO_CARBOHYDRATE_PROTON_SYMPORTER_ACTIVITY	0.234318	1.76e-06	MF138	Positive
CRTAC1	GO_MELANOSOME_MEMBRANE	-0.242487	7.38e-07	CC325	Negative	ATOH8	GO_CYCLIN_DEPENDENT_PROTEIN_SERINE_THREONINE_KINASE_REGULATOR_ACTIVITY	-0.23415	1.79e-06	MF206	Negative
CRTAC1	GO_ENDOPLASMIC_RETICULUM_GOLGI_INTERMEDIATE_COMPARTMENT	-0.364998	2.84e-14	CC186	Negative	ATOH8	GO_IMMUNOGLOBULIN_RECEPTOR_BINDING	-0.233837	1.85e-06	MF406	Negative
CRTAC1	GO_EXTRINSIC_COMPONENT_OF_ORGANELLE_MEMBRANE	0.145649	0.00322908	CC215	Positive	ATOH8	GO_INTRAMOLECULAR_OXIDOREDUCTASE_ACTIVITY	-0.232879	2.04e-06	MF423	Negative
CRTAC1	GO_INTRINSIC_COMPONENT_OF_NUCLEAR_INNER_MEMBRANE	-0.158774	0.00131032	CC285	Negative	ATOH8	GO_OXIDOREDUCTASE_ACTIVITY_ACTING_ON_A_SULFUR_GROUP_OF_DONORS	-0.232557	2.11e-06	MF617	Negative
CRTAC1	GO_CLATHRIN_COATED_ENDOCYTIC_VESICLE_MEMBRANE	-0.40923	<2E-16	CC104	Negative	ATOH8	GO_RNA_POLYMERASE_II_REPRESSING_TRANSCRIPTION_FACTOR_BINDING	0.232361	2.16e-06	MF840	Positive
CRTAC1	GO_HOST_CELL_CYTOPLASM	-0.22366	5.21e-06	CC258	Negative	ATOH8	GO_ORGANOPHOSPHATE_ESTER_TRANSMEMBRANE_TRANSPORTER_ACTIVITY	0.232246	2.18e-06	MF612	Positive
CRTAC1	GO_EXTRINSIC_COMPONENT_OF_PLASMA_MEMBRANE	-0.287819	3.33e-09	CC216	Negative	ATOH8	GO_O_ACYLTRANSFERASE_ACTIVITY	0.23207	2.22e-06	MF597	Positive
CRTAC1	GO_AP_TYPE_MEMBRANE_COAT_ADAPTOR_COMPLEX	0.0236659	0.634046	CC23	Positive	ATOH8	GO_SODIUM_CHLORIDE_SYMPORTER_ACTIVITY	-0.231771	2.29e-06	MF880	Negative
CRTAC1	GO_CHLORIDE_CHANNEL_COMPLEX	-0.305249	3.18e-10	CC83	Negative	ATOH8	GO_INTERMEDIATE_FILAMENT_BINDING	-0.231145	2.44e-06	MF419	Negative
CRTAC1	GO_MITOTIC_SPINDLE	-0.246698	4.66e-07	CC351	Negative	ATOH8	GO_UBIQUITIN_LIKE_PROTEIN_LIGASE_BINDING	-0.230881	2.51e-06	MF996	Negative
CRTAC1	GO_SIN3_TYPE_COMPLEX	0.139315	0.00486753	CC541	Positive	ATOH8	GO_GLUTAMATE_RECEPTOR_BINDING	-0.230683	2.56e-06	MF343	Negative
CRTAC1	GO_PHAGOCYTIC_VESICLE_MEMBRANE	-0.351297	2.89e-13	CC429	Negative	ATOH8	GO_SH2_DOMAIN_BINDING	-0.230644	2.57e-06	MF860	Negative
CRTAC1	GO_INTRINSIC_COMPONENT_OF_PEROXISOMAL_MEMBRANE	0.326707	1.41e-11	CC287	Positive	ATOH8	GO_GROWTH_FACTOR_ACTIVITY	-0.230618	2.58e-06	MF349	Negative
CRTAC1	GO_SWI_SNF_COMPLEX	0.280969	8.05e-09	CC573	Positive	ATOH8	GO_BICARBONATE_TRANSMEMBRANE_TRANSPORTER_ACTIVITY	0.230235	2.68e-06	MF103	Positive
CRTAC1	GO_NUCLEAR_PORE	-0.310507	1.51e-10	CC397	Negative	ATOH8	GO_SUMO_BINDING	-0.230102	2.72e-06	MF920	Negative
CRTAC1	GO_ESCRT_I_COMPLEX	0.204289	3.29e-05	CC199	Positive	ATOH8	GO_RECEPTOR_SIGNALING_COMPLEX_ADAPTOR_ACTIVITY	-0.228475	3.21e-06	MF806	Negative
CRTAC1	GO_DNA_HELICASE_COMPLEX	0.111781	0.0241187	CC166	Positive	ATOH8	GO_SEMAPHORIN_RECEPTOR_BINDING	0.228479	3.21e-06	MF855	Positive
CRTAC1	GO_CLATHRIN_COAT_OF_COATED_PIT	-0.307131	2.44e-10	CC101	Negative	ATOH8	GO_PROTEIN_DISULFIDE_OXIDOREDUCTASE_ACTIVITY	-0.227516	3.54e-06	MF749	Negative
CRTAC1	GO_FILAMENTOUS_ACTIN	-0.312045	1.22e-10	CC223	Negative	ATOH8	GO_NUCLEOSIDE_TRIPHOSPHATASE_REGULATOR_ACTIVITY	-0.225905	4.16e-06	MF587	Negative
CRTAC1	GO_ACTOMYOSIN	-0.211883	1.63e-05	CC12	Negative	ATOH8	GO_PHOSPHOLIPASE_A2_ACTIVITY	0.225283	4.43e-06	MF699	Positive
CRTAC1	GO_SPANNING_COMPONENT_OF_MEMBRANE	0.0013139	0.978918	CC556	Positive	ATOH8	GO_EXTRACELLULAR_MATRIX_STRUCTURAL_CONSTITUENT_CONFERRING_COMPRESSION_RESISTANCE	-0.224982	4.57e-06	MF295	Negative
CRTAC1	GO_SPERM_MIDPIECE	0.0495917	0.318274	CC561	Positive	ATOH8	GO_IRON_ION_TRANSMEMBRANE_TRANSPORTER_ACTIVITY	-0.224655	4.72e-06	MF436	Negative
CRTAC1	GO_COATED_VESICLE	-0.329208	9.63e-12	CC112	Negative	ATOH8	GO_OLIGOPEPTIDE_BINDING	0.223833	5.12e-06	MF601	Positive
CRTAC1	GO_CATALYTIC_STEP_1_SPLICEOSOME	-0.149638	0.00247318	CC61	Negative	ATOH8	GO_FRIZZLED_BINDING	-0.223469	5.31e-06	MF313	Negative
CRTAC1	GO_EUKARYOTIC_48S_PREINITIATION_COMPLEX	0.028106	0.571812	CC202	Positive	ATOH8	GO_LIGAND_GATED_ION_CHANNEL_ACTIVITY	-0.2219	6.2e-06	MF454	Negative
CRTAC1	GO_BRUSH_BORDER	-0.180765	0.000246553	CC54	Negative	ATOH8	GO_EXTRACELLULAR_LIGAND_GATED_ION_CHANNEL_ACTIVITY	-0.22171	6.32e-06	MF291	Negative
CRTAC1	GO_9PLUS2_MOTILE_CILIUM	0.126916	0.0103796	CC3	Positive	ATOH8	GO_RIBOSOME_BINDING	-0.220877	6.86e-06	MF823	Negative
CRTAC1	GO_T_CELL_RECEPTOR_COMPLEX	-0.216229	1.08e-05	CC580	Negative	ATOH8	GO_POTASSIUM_ION_BINDING	-0.22052	7.1e-06	MF730	Negative
CRTAC1	GO_CALYX_OF_HELD	-0.3112	1.37e-10	CC58	Negative	ATOH8	GO_LIGAND_GATED_CALCIUM_CHANNEL_ACTIVITY	-0.220131	7.38e-06	MF452	Negative
CRTAC1	GO_9PLUS0_NON_MOTILE_CILIUM	-0.135843	0.00605416	CC2	Negative	ATOH8	GO_NOTCH_BINDING	-0.21982	7.61e-06	MF573	Negative
CRTAC1	GO_PHOSPHATIDYLINOSITOL_3_KINASE_COMPLEX	-0.319344	4.22e-11	CC433	Negative	ATOH8	GO_LOW_DENSITY_LIPOPROTEIN_PARTICLE_RECEPTOR_BINDING	-0.219629	7.75e-06	MF474	Negative
CRTAC1	GO_PROTON_TRANSPORTING_TWO_SECTOR_ATPASE_COMPLEX	-0.0486892	0.327171	CC489	Negative	ATOH8	GO_SODIUM_PHOSPHATE_SYMPORTER_ACTIVITY	0.219529	7.83e-06	MF883	Positive
CRTAC1	GO_INTERMEDIATE_FILAMENT_CYTOSKELETON	-0.185602	0.000166134	CC275	Negative	ATOH8	GO_DNA_DIRECTED_DNA_POLYMERASE_ACTIVITY	-0.219032	8.22e-06	MF246	Negative
CRTAC1	GO_INTRINSIC_COMPONENT_OF_MITOCHONDRIAL_INNER_MEMBRANE	0.0679103	0.171499	CC282	Positive	ATOH8	GO_ADENYLATE_CYCLASE_ACTIVITY	-0.219028	8.22e-06	MF37	Negative
CRTAC1	GO_FICOLIN_1_RICH_GRANULE_MEMBRANE	-0.418853	<2E-16	CC222	Negative	ATOH8	GO_LIGASE_ACTIVITY_FORMING_CARBON_SULFUR_BONDS	0.218626	8.55e-06	MF459	Positive
CRTAC1	GO_AZUROPHIL_GRANULE	-0.31997	3.85e-11	CC41	Negative	ATOH8	GO_SCAFFOLD_PROTEIN_BINDING	-0.218313	8.81e-06	MF850	Negative
CRTAC1	GO_COMPACT_MYELIN	-0.142483	0.00397228	CC117	Negative	ATOH8	GO_DEATH_RECEPTOR_ACTIVITY	-0.218121	8.98e-06	MF226	Negative
CRTAC1	GO_TIGHT_JUNCTION	-0.0447666	0.367691	CC589	Negative	ATOH8	GO_EUKARYOTIC_INITIATION_FACTOR_4E_BINDING	-0.217271	9.75e-06	MF283	Negative
CRTAC1	GO_ATPASE_DEPENDENT_TRANSMEMBRANE_TRANSPORT_COMPLEX	0.175539	0.000373502	CC33	Positive	ATOH8	GO_PHOSPHOLIPASE_C_ACTIVITY	-0.217231	9.78e-06	MF703	Negative
CRTAC1	GO_MHC_CLASS_II_PROTEIN_COMPLEX	-0.312472	1.14e-10	CC330	Negative	ATOH8	GO_MHC_CLASS_II_PROTEIN_COMPLEX_BINDING	-0.2171	9.91e-06	MF509	Negative
CRTAC1	GO_ANCHORED_COMPONENT_OF_SYNAPTIC_MEMBRANE	-0.00264319	0.957604	CC21	Negative	ATOH8	GO_ACETYLCHOLINE_GATED_CATION_SELECTIVE_CHANNEL_ACTIVITY	-0.216329	1.07e-05	MF16	Negative
CRTAC1	GO_NUCLEAR_EUCHROMATIN	0.00873849	0.860488	CC387	Positive	ATOH8	GO_SEMAPHORIN_RECEPTOR_ACTIVITY	-0.21495	1.22e-05	MF854	Negative
CRTAC1	GO_PROTEASOME_CORE_COMPLEX_BETA_SUBUNIT_COMPLEX	-0.30802	2.15e-10	CC480	Negative	ATOH8	GO_WW_DOMAIN_BINDING	0.214275	1.3e-05	MF1025	Positive
CRTAC1	GO_EXOCYTIC_VESICLE	-0.054496	0.272707	CC207	Negative	ATOH8	GO_AMINO_ACID_SODIUM_SYMPORTER_ACTIVITY	-0.213893	1.35e-05	MF59	Negative
CRTAC1	GO_APICAL_JUNCTION_COMPLEX	-0.0272894	0.583039	CC25	Negative	ATOH8	GO_CALCIUM_RELEASE_CHANNEL_ACTIVITY	-0.212856	1.49e-05	MF127	Negative
CRTAC1	GO_RESPIRATORY_CHAIN_COMPLEX	0.297085	9.74e-10	CC503	Positive	ATOH8	GO_ACETYLCHOLINE_BINDING	-0.212812	1.49e-05	MF15	Negative
CRTAC1	GO_PHAGOCYTIC_CUP	-0.24511	5.55e-07	CC427	Negative	ATOH8	GO_LIPOPROTEIN_PARTICLE_RECEPTOR_ACTIVITY	-0.211843	1.64e-05	MF467	Negative
CRTAC1	GO_COPII_COATED_ER_TO_GOLGI_TRANSPORT_VESICLE	-0.394059	<2E-16	CC132	Negative	ATOH8	GO_NUCLEASE_ACTIVITY	-0.211708	1.66e-05	MF580	Negative
CRTAC1	GO_TRANS_GOLGI_NETWORK_TRANSPORT_VESICLE_MEMBRANE	-0.0779738	0.116272	CC596	Negative	ATOH8	GO_RNA_POLYMERASE_II_GENERAL_TRANSCRIPTION_INITIATION_FACTOR_BINDING	-0.211615	1.67e-05	MF838	Negative
CRTAC1	GO_RIBOSOMAL_SUBUNIT	0.233949	1.83e-06	CC510	Positive	ATOH8	GO_OXIDOREDUCTASE_ACTIVITY_ACTING_ON_THE_CH_NH2_GROUP_OF_DONORS	-0.211178	1.74e-05	MF637	Negative
CRTAC1	GO_MLL3_4_COMPLEX	0.0255801	0.606863	CC356	Positive	ATOH8	GO_ANION_SODIUM_SYMPORTER_ACTIVITY	-0.211119	1.75e-05	MF69	Negative
CRTAC1	GO_BASOLATERAL_PLASMA_MEMBRANE	-0.145027	0.00336422	CC47	Negative	ATOH8	GO_G_PROTEIN_COUPLED_CHEMOATTRACTANT_RECEPTOR_ACTIVITY	-0.210957	1.78e-05	MF319	Negative
CRTAC1	GO_PHAGOCYTIC_VESICLE	-0.342185	1.27e-12	CC428	Negative	ATOH8	GO_STRUCTURAL_CONSTITUENT_OF_RIBOSOME	0.209698	2e-05	MF909	Positive
CRTAC1	GO_AMPA_GLUTAMATE_RECEPTOR_COMPLEX	-0.101006	0.0416837	CC16	Negative	ATOH8	GO_EXODEOXYRIBONUCLEASE_ACTIVITY	-0.209548	2.03e-05	MF285	Negative
CRTAC1	GO_MUSCLE_MYOSIN_COMPLEX	-0.207341	2.49e-05	CC363	Negative	ATOH8	GO_OXIDOREDUCTASE_ACTIVITY_ACTING_ON_THE_CH_NH2_GROUP_OF_DONORS_OXYGEN_AS_ACCEPTOR	-0.209386	2.06e-05	MF638	Negative
CRTAC1	GO_NUCLEOID	0.140296	0.00457263	CC405	Positive	ATOH8	GO_RIBONUCLEASE_ACTIVITY	-0.208955	2.14e-05	MF818	Negative
CRTAC1	GO_POST_MRNA_RELEASE_SPLICEOSOMAL_COMPLEX	0.048941	0.324672	CC455	Positive	ATOH8	GO_CARBOHYDRATE_CATION_SYMPORTER_ACTIVITY	0.208896	2.15e-05	MF135	Positive
CRTAC1	GO_NUCLEAR_PERIPHERY	-0.172836	0.000460905	CC396	Negative	ATOH8	GO_PHOSPHATIDYLINOSITOL_3_4_BISPHOSPHATE_BINDING	-0.208342	2.27e-05	MF678	Negative
CRTAC1	GO_H4_HISTONE_ACETYLTRANSFERASE_COMPLEX	0.0299693	0.546585	CC248	Positive	ATOH8	GO_PROTON_CHANNEL_ACTIVITY	0.206857	2.6e-05	MF781	Positive
CRTAC1	GO_FILOPODIUM_MEMBRANE	-0.321302	3.16e-11	CC225	Negative	ATOH8	GO_EXCITATORY_EXTRACELLULAR_LIGAND_GATED_ION_CHANNEL_ACTIVITY	-0.206311	2.73e-05	MF284	Negative
CRTAC1	GO_EARLY_PHAGOSOME	-0.102433	0.0388674	CC175	Negative	ATOH8	GO_NUCLEOBASE_CONTAINING_COMPOUND_KINASE_ACTIVITY	-0.205921	2.83e-05	MF581	Negative
CRTAC1	GO_EXCITATORY_SYNAPSE	-0.235736	1.52e-06	CC205	Negative	ATOH8	GO_PHOSPHATIDYLINOSITOL_3_KINASE_BINDING	-0.203844	3.42e-05	MF681	Negative
CRTAC1	GO_ENDOLYSOSOME	-0.423585	<2E-16	CC180	Negative	ATOH8	GO_TRANSFORMING_GROWTH_FACTOR_BETA_BINDING	-0.203676	3.48e-05	MF958	Negative
CRTAC1	GO_ISWI_TYPE_COMPLEX	0.0865719	0.0810847	CC296	Positive	ATOH8	GO_HYDROLASE_ACTIVITY_ACTING_ON_ETHER_BONDS	0.203402	3.56e-05	MF397	Positive
CRTAC1	GO_CALCIUM_CHANNEL_COMPLEX	0.0407429	0.412347	CC57	Positive	ATOH8	GO_SIALYLTRANSFERASE_ACTIVITY	-0.202998	3.7e-05	MF864	Negative
CRTAC1	GO_CONDENSED_CHROMOSOME_OUTER_KINETOCHORE	-0.36489	2.91e-14	CC121	Negative	ATOH8	GO_NEUROTRANSMITTER_RECEPTOR_ACTIVITY	-0.202662	3.81e-05	MF564	Negative
CRTAC1	GO_INNER_MITOCHONDRIAL_MEMBRANE_PROTEIN_COMPLEX	0.282168	6.91e-09	CC268	Positive	ATOH8	GO_LONG_CHAIN_FATTY_ACID_COA_LIGASE_ACTIVITY	0.200283	4.71e-05	MF470	Positive
CRTAC1	GO_U1_SNRNP	0.224135	4.97e-06	CC613	Positive	ATOH8	GO_NEUREXIN_FAMILY_PROTEIN_BINDING	0.199093	5.24e-05	MF558	Positive
CRTAC1	GO_REPLICATION_FORK	-0.321416	3.11e-11	CC500	Negative	ATOH8	GO_OXIDOREDUCTASE_ACTIVITY_OXIDIZING_METAL_IONS	-0.199075	5.25e-05	MF639	Negative
CRTAC1	GO_PRESYNAPTIC_ACTIVE_ZONE_MEMBRANE	-0.252344	2.48e-07	CC474	Negative	ATOH8	GO_VOLTAGE_GATED_POTASSIUM_CHANNEL_ACTIVITY	-0.198983	5.29e-05	MF1017	Negative
CRTAC1	GO_SM_LIKE_PROTEIN_FAMILY_COMPLEX	0.0420481	0.397523	CC545	Positive	ATOH8	GO_RNA_POLYMERASE_II_CTD_HEPTAPEPTIDE_REPEAT_KINASE_ACTIVITY	-0.198958	5.3e-05	MF836	Negative
CRTAC1	GO_PHOTORECEPTOR_OUTER_SEGMENT	-0.0871218	0.0791653	CC437	Negative	ATOH8	GO_CALCIUM_CHANNEL_REGULATOR_ACTIVITY	-0.198863	5.35e-05	MF120	Negative
CRTAC1	GO_PHOTORECEPTOR_INNER_SEGMENT	-0.00393168	0.936973	CC436	Negative	ATOH8	GO_C_C_CHEMOKINE_BINDING	-0.198567	5.49e-05	MF111	Negative
CRTAC1	GO_FIBRILLAR_CENTER	0.0583954	0.239809	CC219	Positive	ATOH8	GO_IONOTROPIC_GLUTAMATE_RECEPTOR_ACTIVITY	-0.198384	5.58e-05	MF433	Negative
CRTAC1	GO_SCF_UBIQUITIN_LIGASE_COMPLEX	-0.0539022	0.277974	CC530	Negative	ATOH8	GO_NUCLEOTIDE_SUGAR_TRANSMEMBRANE_TRANSPORTER_ACTIVITY	-0.197315	6.13e-05	MF594	Negative
CRTAC1	GO_INTRINSIC_COMPONENT_OF_ENDOPLASMIC_RETICULUM_MEMBRANE	-0.283688	5.69e-09	CC279	Negative	ATOH8	GO_CARBON_NITROGEN_LIGASE_ACTIVITY_WITH_GLUTAMINE_AS_AMIDO_N_DONOR	-0.196856	6.38e-05	MF141	Negative
CRTAC1	GO_STAGA_COMPLEX	0.214884	1.23e-05	CC570	Positive	ATOH8	GO_INTRACELLULAR_LIGAND_GATED_ION_CHANNEL_ACTIVITY	-0.195759	7.02e-05	MF421	Negative
CRTAC1	GO_SPLICEOSOMAL_COMPLEX	0.0620468	0.211628	CC568	Positive	ATOH8	GO_PHOSPHOPROTEIN_PHOSPHATASE_ACTIVITY	-0.195751	7.02e-05	MF709	Negative
CRTAC1	GO_GOLGI_ASSOCIATED_VESICLE	-0.354365	1.74e-13	CC238	Negative	ATOH8	GO_PALMITOYLTRANSFERASE_ACTIVITY	0.195676	7.07e-05	MF646	Positive
CRTAC1	GO_LATERAL_ELEMENT	-0.307891	2.19e-10	CC309	Negative	ATOH8	GO_GLUCOCORTICOID_RECEPTOR_BINDING	-0.193212	8.75e-05	MF336	Negative
CRTAC1	GO_CUL2_RING_UBIQUITIN_LIGASE_COMPLEX	0.0788383	0.112267	CC138	Positive	ATOH8	GO_RNA_7_METHYLGUANOSINE_CAP_BINDING	-0.191057	0.00010516	MF824	Negative
CRTAC1	GO_INHIBITORY_SYNAPSE	-0.0544569	0.273052	CC267	Negative	ATOH8	GO_L_GLUTAMATE_TRANSMEMBRANE_TRANSPORTER_ACTIVITY	-0.191046	0.000105263	MF446	Negative
CRTAC1	GO_APICAL_PART_OF_CELL	-0.177419	0.000322084	CC26	Negative	ATOH8	GO_SH3_SH2_ADAPTOR_ACTIVITY	-0.190415	0.000111049	MF862	Negative
CRTAC1	GO_CILIARY_ROOTLET	0.0807979	0.103592	CC95	Positive	ATOH8	GO_CALCIUM_DEPENDENT_PHOSPHOLIPID_BINDING	-0.187658	0.00014004	MF123	Negative
CRTAC1	GO_GOLGI_CISTERNA	-0.0638885	0.198355	CC241	Negative	ATOH8	GO_PEPTIDE_ALPHA_N_ACETYLTRANSFERASE_ACTIVITY	-0.186935	0.000148741	MF653	Negative
CRTAC1	GO_MITOTIC_SPINDLE_MIDZONE	-0.191055	0.000105184	CC352	Negative	ATOH8	GO_SODIUM_INDEPENDENT_ORGANIC_ANION_TRANSMEMBRANE_TRANSPORTER_ACTIVITY	-0.185733	0.000164338	MF881	Negative
CRTAC1	GO_SCHMIDT_LANTERMAN_INCISURE	-0.176215	0.00035418	CC532	Negative	ATOH8	GO_RETINOL_DEHYDROGENASE_ACTIVITY	0.185486	0.000167726	MF815	Positive
CRTAC1	GO_AXON_CYTOPLASM	-0.035072	0.480442	CC37	Negative	ATOH8	GO_POTASSIUM_ION_TRANSMEMBRANE_TRANSPORTER_ACTIVITY	-0.184911	0.000175873	MF732	Negative
CRTAC1	GO_INCLUSION_BODY	-0.163763	0.000912983	CC265	Negative	ATOH8	GO_POLY_A_SPECIFIC_RIBONUCLEASE_ACTIVITY	0.184505	0.000181843	MF720	Positive
CRTAC1	GO_MITOCHONDRIAL_LARGE_RIBOSOMAL_SUBUNIT	0.0478764	0.335321	CC346	Positive	ATOH8	GO_ALCOHOL_DEHYDROGENASE_NADPPLUS_ACTIVITY	0.184501	0.000181904	MF45	Positive
CRTAC1	GO_CULLIN_RING_UBIQUITIN_LIGASE_COMPLEX	-0.0324819	0.513464	CC142	Negative	ATOH8	GO_NEUTRAL_AMINO_ACID_TRANSMEMBRANE_TRANSPORTER_ACTIVITY	-0.184182	0.000186741	MF569	Negative
CRTAC1	GO_CATENIN_COMPLEX	-0.0513944	0.300978	CC63	Negative	ATOH8	GO_OXYGEN_CARRIER_ACTIVITY	0.183883	0.000191372	MF642	Positive
CRTAC1	GO_TRANSCRIPTION_FACTOR_TFIIH_HOLO_COMPLEX	-0.0256398	0.606024	CC601	Negative	ATOH8	GO_CALCIUM_CATION_ANTIPORTER_ACTIVITY	-0.183101	0.000204006	MF118	Negative
CRTAC1	GO_ANCHORED_COMPONENT_OF_PLASMA_MEMBRANE	-0.268134	3.94e-08	CC20	Negative	ATOH8	GO_HEPARAN_SULFATE_PROTEOGLYCAN_BINDING	-0.182879	0.000207721	MF364	Negative
CRTAC1	GO_INTERCALATED_DISC	-0.294831	1.32e-09	CC273	Negative	ATOH8	GO_RIBONUCLEOPROTEIN_COMPLEX_BINDING	-0.182756	0.000209812	MF820	Negative
CRTAC1	GO_SPECIFIC_GRANULE	-0.337439	2.69e-12	CC557	Negative	ATOH8	GO_BETA_TUBULIN_BINDING	-0.18181	0.000226587	MF100	Negative
CRTAC1	GO_PODOSOME	-0.297693	8.97e-10	CC450	Negative	ATOH8	GO_FERROUS_IRON_BINDING	-0.181034	0.000241259	MF304	Negative
CRTAC1	GO_CLATHRIN_SCULPTED_VESICLE	-0.162458	0.00100453	CC108	Negative	ATOH8	GO_POTASSIUM_CHANNEL_ACTIVITY	-0.180895	0.000243974	MF727	Negative
CRTAC1	GO_RESPIRATORY_CHAIN_COMPLEX_III	0.353542	1.99e-13	CC504	Positive	ATOH8	GO_PHOSPHATASE_BINDING	-0.180892	0.000244034	MF668	Negative
CRTAC1	GO_MICROTUBULE_ORGANIZING_CENTER_ATTACHMENT_SITE	-0.0125552	0.800638	CC339	Negative	ATOH8	GO_OXIDOREDUCTASE_ACTIVITY_OXIDIZING_METAL_IONS_OXYGEN_AS_ACCEPTOR	-0.180106	0.000259957	MF640	Negative
CRTAC1	GO_MICROTUBULE_ASSOCIATED_COMPLEX	-0.335168	3.84e-12	CC337	Negative	ATOH8	GO_SERINE_TYPE_ENDOPEPTIDASE_INHIBITOR_ACTIVITY	-0.180035	0.000261443	MF858	Negative
CRTAC1	GO_ATPASE_COMPLEX	0.178671	0.000291587	CC32	Positive	ATOH8	GO_STEROID_HYDROXYLASE_ACTIVITY	0.17937	0.000275774	MF899	Positive
CRTAC1	GO_CONDENSED_CHROMOSOME_CENTROMERIC_REGION	-0.340901	1.56e-12	CC120	Negative	ATOH8	GO_COPPER_ION_BINDING	-0.179263	0.000278129	MF192	Negative
CRTAC1	GO_PLATELET_DENSE_GRANULE	-0.0781453	0.115469	CC446	Negative	ATOH8	GO_RNA_POLYMERASE_II_ACTIVITY	0.178787	0.000288914	MF834	Positive
CRTAC1	GO_INO80_TYPE_COMPLEX	0.185031	0.000174147	CC269	Positive	ATOH8	GO_COFACTOR_BINDING	0.178105	0.000305022	MF188	Positive
CRTAC1	GO_EARLY_ENDOSOME_MEMBRANE	-0.213205	1.44e-05	CC174	Negative	ATOH8	GO_OXIDOREDUCTASE_ACTIVITY_ACTING_ON_PEROXIDE_AS_ACCEPTOR	0.17702	0.000332402	MF629	Positive
CRTAC1	GO_INTRINSIC_COMPONENT_OF_PRESYNAPTIC_ACTIVE_ZONE_MEMBRANE	-0.114026	0.021402	CC291	Negative	ATOH8	GO_NEUROTRANSMITTER_TRANSMEMBRANE_TRANSPORTER_ACTIVITY	-0.175445	0.000376263	MF568	Negative
CRTAC1	GO_CENTRIOLE	-0.178442	0.000296948	CC80	Negative	ATOH8	GO_SIGNALING_ADAPTOR_ACTIVITY	-0.175141	0.000385301	MF866	Negative
CRTAC1	GO_CILIARY_TRANSITION_ZONE	0.0788375	0.112271	CC97	Positive	ATOH8	GO_TRANSLATION_REPRESSOR_ACTIVITY_MRNA_REGULATORY_ELEMENT_BINDING	-0.173899	0.000424469	MF970	Negative
CRTAC1	GO_CCR4_NOT_COMPLEX	0.189915	0.000115851	CC67	Positive	ATOH8	GO_MACROMOLECULE_TRANSMEMBRANE_TRANSPORTER_ACTIVITY	-0.173186	0.000448615	MF483	Negative
CRTAC1	GO_ENDOPLASMIC_RETICULUM_SUBCOMPARTMENT	0.0328346	0.508898	CC190	Positive	ATOH8	GO_HEXOSE_TRANSMEMBRANE_TRANSPORTER_ACTIVITY	-0.172023	0.000490703	MF368	Negative
CRTAC1	GO_ASTER	-0.189346	0.000121552	CC30	Negative	ATOH8	GO_SULFURIC_ESTER_HYDROLASE_ACTIVITY	-0.171892	0.000495678	MF918	Negative
CRTAC1	GO_ESCRT_III_COMPLEX	0.280378	8.67e-09	CC200	Positive	ATOH8	GO_HORMONE_BINDING	-0.171197	0.000522796	MF385	Negative
CRTAC1	GO_I_BAND	-0.242573	7.31e-07	CC261	Negative	ATOH8	GO_RNA_HELICASE_ACTIVITY	-0.169313	0.000603489	MF827	Negative
CRTAC1	GO_MICROBODY	0.303282	4.17e-10	CC332	Positive	ATOH8	GO_POLYPEPTIDE_N_ACETYLGALACTOSAMINYLTRANSFERASE_ACTIVITY	-0.168762	0.000629128	MF723	Negative
CRTAC1	GO_PRESYNAPTIC_CYTOSOL	-0.351408	2.84e-13	CC475	Negative	ATOH8	GO_STRUCTURAL_CONSTITUENT_OF_MUSCLE	-0.16857	0.00063835	MF905	Negative
CRTAC1	GO_CONDENSED_NUCLEAR_CHROMOSOME	-0.330602	7.78e-12	CC122	Negative	ATOH8	GO_PHOSPHATIDYLINOSITOL_KINASE_ACTIVITY	-0.16821	0.000655873	MF692	Negative
CRTAC1	GO_GLYCOPROTEIN_COMPLEX	-0.171459	0.000512416	CC237	Negative	ATOH8	GO_METHYL_CPG_BINDING	-0.167851	0.000673852	MF506	Negative
CRTAC1	GO_NUCLEAR_LAMINA	-0.155504	0.00165128	CC392	Negative	ATOH8	GO_INWARD_RECTIFIER_POTASSIUM_CHANNEL_ACTIVITY	-0.167121	0.000711777	MF428	Negative
CRTAC1	GO_CYTOPLASMIC_DYNEIN_COMPLEX	-0.0403108	0.417326	CC145	Negative	ATOH8	GO_PHOSPHATIDYLETHANOLAMINE_BINDING	-0.166737	0.00073251	MF675	Negative
CRTAC1	GO_ACETYLCHOLINE_GATED_CHANNEL_COMPLEX	-0.204588	3.2e-05	CC5	Negative	ATOH8	GO_CARBONATE_DEHYDRATASE_ACTIVITY	0.166729	0.000732937	MF144	Positive
CRTAC1	GO_VESICLE_TETHERING_COMPLEX	0.234705	1.69e-06	CC627	Positive	ATOH8	GO_ORGANIC_CATION_TRANSMEMBRANE_TRANSPORTER_ACTIVITY	0.166702	0.000734422	MF610	Positive
CRTAC1	GO_SMALL_SUBUNIT_PROCESSOME	0.0149465	0.763701	CC549	Positive	ATOH8	GO_OXIDOREDUCTASE_ACTIVITY_ACTING_ON_A_SULFUR_GROUP_OF_DONORS_NAD_P_AS_ACCEPTOR	-0.166452	0.000748244	MF618	Negative
CRTAC1	GO_TORC2_COMPLEX	-0.110377	0.0259654	CC592	Negative	ATOH8	GO_CHLORIDE_CHANNEL_REGULATOR_ACTIVITY	-0.165796	0.000785697	MF176	Negative
CRTAC1	GO_CYTOCHROME_COMPLEX	0.342136	1.28e-12	CC144	Positive	ATOH8	GO_14_3_3_PROTEIN_BINDING	-0.165647	0.000794431	MF4	Negative
CRTAC1	GO_PLATELET_ALPHA_GRANULE_LUMEN	-0.30813	2.12e-10	CC444	Negative	ATOH8	GO_TRANSFORMING_GROWTH_FACTOR_BETA_RECEPTOR_BINDING	0.164285	0.000878612	MF959	Positive
CRTAC1	GO_CYTOPLASMIC_STRESS_GRANULE	-0.0133448	0.788387	CC151	Negative	ATOH8	GO_2_OXOGLUTARATE_DEPENDENT_DIOXYGENASE_ACTIVITY	-0.163325	0.000942844	MF6	Negative
CRTAC1	GO_RESPIRATORY_CHAIN_COMPLEX_IV	0.247686	4.18e-07	CC505	Positive	ATOH8	GO_STEROID_HORMONE_RECEPTOR_BINDING	-0.161206	0.00110016	MF898	Negative
CRTAC1	GO_PROTON_TRANSPORTING_V_TYPE_ATPASE_V0_DOMAIN	-0.20311	3.66e-05	CC493	Negative	ATOH8	GO_EXOPEPTIDASE_ACTIVITY	-0.160802	0.00113279	MF289	Negative
CRTAC1	GO_MYOSIN_COMPLEX	-0.343109	1.1e-12	CC366	Negative	ATOH8	GO_ADENOSINE_DEAMINASE_ACTIVITY	-0.160644	0.00114577	MF36	Negative
CRTAC1	GO_NUCLEAR_EXOSOME_RNASE_COMPLEX	-0.0660059	0.183857	CC388	Negative	ATOH8	GO_FATTY_ACID_SYNTHASE_ACTIVITY	-0.160465	0.00116069	MF301	Negative
CRTAC1	GO_CYTOPLASMIC_EXOSOME_RNASE_COMPLEX	-0.0209118	0.674027	CC146	Negative	ATOH8	GO_CYCLOSPORIN_A_BINDING	-0.16019	0.00118385	MF207	Negative
CRTAC1	GO_ENDORIBONUCLEASE_COMPLEX	0.0824308	0.0967754	CC192	Positive	ATOH8	GO_SNORNA_BINDING	-0.156788	0.0015088	MF876	Negative
CRTAC1	GO_N_TERMINAL_PROTEIN_ACETYLTRANSFERASE_COMPLEX	-0.14622	0.00310933	CC369	Negative	ATOH8	GO_C_ACYLTRANSFERASE_ACTIVITY	0.156573	0.00153181	MF110	Positive
CRTAC1	GO_SMALL_NUCLEAR_RIBONUCLEOPROTEIN_COMPLEX	0.0404114	0.416164	CC546	Positive	ATOH8	GO_MECHANOSENSITIVE_ION_CHANNEL_ACTIVITY	0.155878	0.00160856	MF495	Positive
CRTAC1	GO_NUCLEAR_ENVELOPE	-0.323932	2.14e-11	CC386	Negative	ATOH8	GO_ALDO_KETO_REDUCTASE_NADP_ACTIVITY	0.155421	0.00166098	MF49	Positive
CRTAC1	GO_POLYSOMAL_RIBOSOME	0.309451	1.76e-10	CC452	Positive	ATOH8	GO_TRANSFERASE_ACTIVITY_TRANSFERRING_GLYCOSYL_GROUPS	-0.154349	0.00179001	MF951	Negative
CRTAC1	GO_FLEMMING_BODY	-0.147507	0.0028542	CC227	Negative	ATOH8	GO_UBIQUITIN_LIKE_PROTEIN_SPECIFIC_PROTEASE_ACTIVITY	-0.152863	0.00198402	MF997	Negative
CRTAC1	GO_SPINDLE	-0.331414	6.87e-12	CC563	Negative	ATOH8	GO_ATPASE_BINDING	-0.151078	0.00224265	MF91	Negative
CRTAC1	GO_ENDOLYSOSOME_MEMBRANE	-0.413427	<2E-16	CC181	Negative	ATOH8	GO_MANNOSE_BINDING	-0.150563	0.00232272	MF488	Negative
CRTAC1	GO_ENDOPLASMIC_RETICULUM_QUALITY_CONTROL_COMPARTMENT	-0.117231	0.0179845	CC189	Negative	ATOH8	GO_CARBON_OXYGEN_LYASE_ACTIVITY	0.150403	0.0023481	MF143	Positive
CRTAC1	GO_U2_TYPE_SPLICEOSOMAL_COMPLEX	0.0103789	0.834645	CC617	Positive	ATOH8	GO_PHOSPHORUS_OXYGEN_LYASE_ACTIVITY	-0.149603	0.00247902	MF712	Negative
CRTAC1	GO_POLYSOME	0.149108	0.00256337	CC453	Positive	ATOH8	GO_ENDORIBONUCLEASE_ACTIVITY	-0.148046	0.00275302	MF275	Negative
CRTAC1	GO_TRANS_GOLGI_NETWORK_MEMBRANE	-0.186336	0.000156327	CC594	Negative	ATOH8	GO_TRANSLATION_REPRESSOR_ACTIVITY	-0.147485	0.0028583	MF969	Negative
CRTAC1	GO_LOW_DENSITY_LIPOPROTEIN_PARTICLE	-0.386242	6.66e-16	CC313	Negative	ATOH8	GO_NON_MEMBRANE_SPANNING_PROTEIN_TYROSINE_KINASE_ACTIVITY	-0.14692	0.00296804	MF572	Negative
CRTAC1	GO_CHAPERONIN_CONTAINING_T_COMPLEX	-0.107377	0.0303225	CC82	Negative	ATOH8	GO_EXONUCLEASE_ACTIVITY_ACTIVE_WITH_EITHER_RIBO_OR_DEOXYRIBONUCLEIC_ACIDS_AND_PRODUCING_5_PHOSPHOMONOESTERS	-0.146788	0.00299428	MF288	Negative
CRTAC1	GO_PROTON_TRANSPORTING_TWO_SECTOR_ATPASE_COMPLEX_PROTON_TRANSPORTING_DOMAIN	-0.125329	0.0113858	CC491	Negative	ATOH8	GO_EPHRIN_RECEPTOR_ACTIVITY	-0.146341	0.00308451	MF278	Negative
CRTAC1	GO_PLATELET_DENSE_TUBULAR_NETWORK	-0.382085	1.33e-15	CC448	Negative	ATOH8	GO_EXONUCLEASE_ACTIVITY	-0.145756	0.00320628	MF287	Negative
CRTAC1	GO_COSTAMERE	-0.294865	1.31e-09	CC137	Negative	ATOH8	GO_ALKALI_METAL_ION_BINDING	-0.145623	0.0032346	MF50	Negative
CRTAC1	GO_CATION_CHANNEL_COMPLEX	-0.139339	0.00486	CC64	Negative	ATOH8	GO_LAMININ_BINDING	-0.145405	0.00328145	MF448	Negative
CRTAC1	GO_OLIGOSACCHARYLTRANSFERASE_COMPLEX	-0.0660622	0.183482	CC408	Negative	ATOH8	GO_ALDITOL_NADPPLUS_1_OXIDOREDUCTASE_ACTIVITY	0.144299	0.00352898	MF48	Positive
CRTAC1	GO_PROTEASOME_CORE_COMPLEX	-0.295343	1.23e-09	CC479	Negative	ATOH8	GO_PROTEIN_TYROSINE_PHOSPHATASE_ACTIVITY	-0.144048	0.00358759	MF778	Negative
CRTAC1	GO_HOST_CELLULAR_COMPONENT	-0.329363	9.41e-12	CC260	Negative	ATOH8	GO_CYSTEINE_TYPE_ENDOPEPTIDASE_ACTIVITY	-0.143117	0.00381217	MF209	Negative
CRTAC1	GO_PRECATALYTIC_SPLICEOSOME	-0.077889	0.116671	CC466	Negative	ATOH8	GO_TFIID_CLASS_TRANSCRIPTION_FACTOR_COMPLEX_BINDING	-0.142954	0.0038527	MF935	Negative
CRTAC1	GO_FICOLIN_1_RICH_GRANULE	-0.366584	2.18e-14	CC221	Negative	ATOH8	GO_NUCLEOTIDASE_ACTIVITY	-0.142729	0.00390953	MF591	Negative
CRTAC1	GO_P_BODY	0.0317167	0.523439	CC417	Positive	ATOH8	GO_PURINE_NUCLEOTIDE_TRANSMEMBRANE_TRANSPORTER_ACTIVITY	0.142591	0.00394453	MF785	Positive
CRTAC1	GO_PERIKARYON	-0.11045	0.025866	CC425	Negative	ATOH8	GO_METALLOENDOPEPTIDASE_INHIBITOR_ACTIVITY	-0.142202	0.00404527	MF503	Negative
CRTAC1	GO_CLATHRIN_VESICLE_COAT	-0.170756	0.000540722	CC109	Negative	ATOH8	GO_REPRESSING_TRANSCRIPTION_FACTOR_BINDING	0.141042	0.00435929	MF809	Positive
CRTAC1	GO_SARCOLEMMA	-0.278409	1.11e-08	CC527	Negative	ATOH8	GO_ISOPRENOID_BINDING	0.139015	0.00496108	MF438	Positive
CRTAC1	GO_HISTONE_METHYLTRANSFERASE_COMPLEX	0.0113915	0.818779	CC256	Positive	ATOH8	GO_PHOSPHATASE_ACTIVITY	-0.138776	0.00503668	MF667	Negative
CRTAC1	GO_HIGH_DENSITY_LIPOPROTEIN_PARTICLE	-0.193038	8.88e-05	CC253	Negative	ATOH8	GO_TRANSLATION_REGULATOR_ACTIVITY	-0.138539	0.00511299	MF967	Negative
CRTAC1	GO_TERMINAL_BOUTON	-0.25626	1.59e-07	CC584	Negative	ATOH8	GO_PHOSPHATIDYLINOSITOL_3_PHOSPHATE_BINDING	-0.138038	0.00527699	MF684	Negative
CRTAC1	GO_MULTIMERIC_RIBONUCLEASE_P_COMPLEX	0.0365894	0.461646	CC360	Positive	ATOH8	GO_CAMP_DEPENDENT_PROTEIN_KINASE_REGULATOR_ACTIVITY	-0.137913	0.00531894	MF132	Negative
CRTAC1	GO_ESCRT_COMPLEX	0.27401	1.92e-08	CC198	Positive	ATOH8	GO_ORGANIC_ACID_BINDING	-0.136571	0.00578586	MF606	Negative
CRTAC1	GO_LAMELLIPODIUM	-0.283317	5.96e-09	CC303	Negative	ATOH8	GO_OXIDOREDUCTASE_ACTIVITY_ACTING_ON_THE_CH_NH_GROUP_OF_DONORS_NAD_OR_NADP_AS_ACCEPTOR	-0.135126	0.00632941	MF636	Negative
CRTAC1	GO_NON_MOTILE_CILIUM	-0.0961882	0.0524947	CC382	Negative	ATOH8	GO_HISTONE_DEACETYLASE_ACTIVITY_H3_K14_SPECIFIC	0.134467	0.00659212	MF374	Positive
CRTAC1	GO_CLATHRIN_COATED_ENDOCYTIC_VESICLE	-0.39068	2.22e-16	CC103	Negative	ATOH8	GO_ESTRADIOL_17_BETA_DEHYDROGENASE_ACTIVITY	0.134226	0.00669068	MF281	Positive
CRTAC1	GO_PORE_COMPLEX	0.0380901	0.443466	CC454	Positive	ATOH8	GO_PHOSPHATIDYLCHOLINE_TRANSPORTER_ACTIVITY	-0.134145	0.00672407	MF674	Negative
CRTAC1	GO_CILIARY_BASAL_BODY	0.0767124	0.122315	CC91	Positive	ATOH8	GO_TRANSCRIPTION_COREPRESSOR_BINDING	-0.133817	0.00686105	MF947	Negative
CRTAC1	GO_SEX_CHROMOSOME	-0.132212	0.0075667	CC539	Negative	ATOH8	GO_NEUROPEPTIDE_BINDING	-0.132989	0.00721725	MF559	Negative
CRTAC1	GO_CILIARY_MEMBRANE	0.0358018	0.47135	CC93	Positive	ATOH8	GO_UBIQUITIN_LIKE_MODIFIER_ACTIVATING_ENZYME_ACTIVITY	-0.13205	0.00764172	MF991	Negative
CRTAC1	GO_NUCLEAR_PORE_OUTER_RING	-0.284137	5.37e-09	CC399	Negative	ATOH8	GO_OXYGEN_BINDING	0.131849	0.00773528	MF641	Positive
CRTAC1	GO_ASTROCYTE_PROJECTION	-0.309792	1.68e-10	CC31	Negative	ATOH8	GO_MANNOSYLTRANSFERASE_ACTIVITY	0.131273	0.00800937	MF490	Positive
CRTAC1	GO_CHROMOSOME_TELOMERIC_REGION	-0.192168	9.57e-05	CC89	Negative	ATOH8	GO_INTRAMOLECULAR_OXIDOREDUCTASE_ACTIVITY_TRANSPOSING_C_C_BONDS	0.13105	0.00811772	MF424	Positive
CRTAC1	GO_GUANYL_NUCLEOTIDE_EXCHANGE_FACTOR_COMPLEX	-0.307497	2.32e-10	CC246	Negative	ATOH8	GO_CAMP_RESPONSE_ELEMENT_BINDING	-0.130617	0.0083321	MF133	Negative
CRTAC1	GO_PSEUDOPODIUM	-0.365722	2.53e-14	CC495	Negative	ATOH8	GO_INTERLEUKIN_1_RECEPTOR_BINDING	-0.130584	0.00834842	MF418	Negative
CRTAC1	GO_AXOLEMMA	-0.265778	5.22e-08	CC36	Negative	ATOH8	GO_OXIDOREDUCTASE_ACTIVITY_ACTING_ON_SINGLE_DONORS_WITH_INCORPORATION_OF_MOLECULAR_OXYGEN	-0.13044	0.00842134	MF630	Negative
CRTAC1	GO_PHAGOPHORE_ASSEMBLY_SITE	-0.089537	0.0711667	CC430	Negative	ATOH8	GO_ARMADILLO_REPEAT_DOMAIN_BINDING	-0.130342	0.00847058	MF79	Negative
CRTAC1	GO_SPECIFIC_GRANULE_LUMEN	-0.345321	7.68e-13	CC558	Negative	ATOH8	GO_STEROL_TRANSPORTER_ACTIVITY	-0.13019	0.00854814	MF901	Negative
CRTAC1	GO_VESICLE_LUMEN	-0.407033	<2E-16	CC626	Negative	ATOH8	GO_PROTEIN_SERINE_THREONINE_PHOSPHATASE_ACTIVITY	-0.12921	0.00906363	MF772	Negative
CRTAC1	GO_TRANS_GOLGI_NETWORK_TRANSPORT_VESICLE	-0.0886429	0.0740473	CC595	Negative	ATOH8	GO_CATION_CHANNEL_ACTIVITY	-0.128638	0.00937702	MF160	Negative
CRTAC1	GO_SECRETORY_GRANULE_MEMBRANE	-0.366324	2.26e-14	CC534	Negative	ATOH8	GO_PHOSPHORIC_ESTER_HYDROLASE_ACTIVITY	-0.127777	0.00986691	MF711	Negative
CRTAC1	GO_DIHYDROLIPOYL_DEHYDROGENASE_COMPLEX	0.15195	0.00211266	CC164	Positive	ATOH8	GO_P53_BINDING	-0.127083	0.0102779	MF643	Negative
CRTAC1	GO_CYTOPLASMIC_UBIQUITIN_LIGASE_COMPLEX	-0.116085	0.0191475	CC152	Negative	ATOH8	GO_SOLUTE_SODIUM_SYMPORTER_ACTIVITY	-0.12496	0.0116323	MF891	Negative
CRTAC1	GO_PHAGOPHORE_ASSEMBLY_SITE_MEMBRANE	-0.00396953	0.936367	CC431	Negative	ATOH8	GO_STRUCTURAL_CONSTITUENT_OF_MYELIN_SHEATH	0.124766	0.0117635	MF906	Positive
CRTAC1	GO_STEREOCILIUM_TIP	0.0826092	0.0960528	CC572	Positive	ATOH8	GO_COENZYME_BINDING	0.124195	0.012157	MF187	Positive
CRTAC1	GO_POSTSYNAPTIC_SPECIALIZATION_MEMBRANE	-0.165345	0.00081245	CC463	Negative	ATOH8	GO_MAP_KINASE_KINASE_ACTIVITY	-0.123911	0.0123575	MF492	Negative
CRTAC1	GO_MYELIN_SHEATH	-0.193319	8.67e-05	CC364	Negative	ATOH8	GO_DICARBOXYLIC_ACID_TRANSMEMBRANE_TRANSPORTER_ACTIVITY	0.123633	0.0125566	MF233	Positive
CRTAC1	GO_RIBOSOME	0.228725	3.13e-06	CC511	Positive	ATOH8	GO_RETINOIC_ACID_RECEPTOR_BINDING	-0.123422	0.0127093	MF812	Negative
CRTAC1	GO_CELL_TRAILING_EDGE	-0.200999	4.42e-05	CC78	Negative	ATOH8	GO_FUCOSYLTRANSFERASE_ACTIVITY	-0.122651	0.0132814	MF314	Negative
CRTAC1	GO_METHYLOSOME	0.0770407	0.120719	CC328	Positive	ATOH8	GO_DNA_BINDING_TRANSCRIPTION_ACTIVATOR_ACTIVITY	-0.121656	0.0140537	MF242	Negative
CRTAC1	GO_PALMITOYLTRANSFERASE_COMPLEX	0.196121	6.8e-05	CC418	Positive	ATOH8	GO_SNARE_BINDING	-0.121458	0.0142118	MF875	Negative
CRTAC1	GO_LAMELLIPODIUM_MEMBRANE	-0.354951	1.58e-13	CC304	Negative	ATOH8	GO_PHOSPHOTRANSFERASE_ACTIVITY_FOR_OTHER_SUBSTITUTED_PHOSPHATE_GROUPS	0.121412	0.0142486	MF713	Positive
CRTAC1	GO_CUL3_RING_UBIQUITIN_LIGASE_COMPLEX	0.0396745	0.424723	CC139	Positive	ATOH8	GO_TRANSLATION_ACTIVATOR_ACTIVITY	-0.121258	0.014373	MF962	Negative
CRTAC1	GO_AZUROPHIL_GRANULE_MEMBRANE	-0.254302	1.99e-07	CC43	Negative	ATOH8	GO_PROTEIN_PHOSPHATASE_1_BINDING	-0.120695	0.0148362	MF763	Negative
CRTAC1	GO_INFLAMMASOME_COMPLEX	-0.196028	6.86e-05	CC266	Negative	ATOH8	GO_GTP_RHO_BINDING	-0.120456	0.015037	MF353	Negative
CRTAC1	GO_BLOC_1_COMPLEX	0.0632207	0.203096	CC50	Positive	ATOH8	GO_CYCLIC_NUCLEOTIDE_DEPENDENT_PROTEIN_KINASE_ACTIVITY	-0.120107	0.0153338	MF200	Negative
CRTAC1	GO_CHROMOCENTER	-0.270098	3.1e-08	CC86	Negative	ATOH8	GO_GLUCURONOSYLTRANSFERASE_ACTIVITY	0.119931	0.0154852	MF340	Positive
CRTAC1	GO_OUTER_MITOCHONDRIAL_MEMBRANE_PROTEIN_COMPLEX	0.0374926	0.450655	CC415	Positive	ATOH8	GO_PROTON_EXPORTING_ATPASE_ACTIVITY_PHOSPHORYLATIVE_MECHANISM	-0.119461	0.0158969	MF782	Negative
CRTAC1	GO_PCG_PROTEIN_COMPLEX	-0.0866869	0.08068	CC421	Negative	ATOH8	GO_THIOESTERASE_BINDING	-0.118901	0.0164003	MF936	Negative
CRTAC1	GO_CONDENSED_NUCLEAR_CHROMOSOME_CENTROMERIC_REGION	-0.353357	2.06e-13	CC123	Negative	ATOH8	GO_RAS_GUANYL_NUCLEOTIDE_EXCHANGE_FACTOR_ACTIVITY	-0.118629	0.0166501	MF802	Negative
CRTAC1	GO_PRESYNAPSE	-0.218101	8.99e-06	CC471	Negative	ATOH8	GO_SOLUTE_CATION_SYMPORTER_ACTIVITY	-0.117998	0.017241	MF888	Negative
CRTAC1	GO_POSTSYNAPTIC_ENDOSOME	0.436288	<2E-16	CC460	Positive	ATOH8	GO_DIPEPTIDYL_PEPTIDASE_ACTIVITY	-0.117955	0.0172819	MF236	Negative
CRTAC1	GO_ZYMOGEN_GRANULE_MEMBRANE	0.257309	1.41e-07	CC633	Positive	ATOH8	GO_SULFOTRANSFERASE_ACTIVITY	-0.117789	0.0174415	MF915	Negative
CRTAC1	GO_CILIARY_BASE	-0.0917689	0.0643745	CC92	Negative	ATOH8	GO_OXIDOREDUCTASE_ACTIVITY_ACTING_ON_THE_CH_NH_GROUP_OF_DONORS	-0.117341	0.0178762	MF635	Negative
CRTAC1	GO_ORGANELLE_SUBCOMPARTMENT	-0.156264	0.00156552	CC413	Negative	ATOH8	GO_TRANSFERASE_ACTIVITY_TRANSFERRING_ONE_CARBON_GROUPS	0.116657	0.0185591	MF954	Positive
CRTAC1	GO_AXONEMAL_DYNEIN_COMPLEX	-0.0771911	0.119993	CC40	Negative	ATOH8	GO_RNA_POLYMERASE_II_INTRONIC_TRANSCRIPTION_REGULATORY_REGION_SEQUENCE_SPECIFIC_DNA_BINDING	0.115704	0.0195479	MF839	Positive
CRTAC1	GO_NMDA_SELECTIVE_GLUTAMATE_RECEPTOR_COMPLEX	-0.188028	0.000135776	CC380	Negative	ATOH8	GO_SECONDARY_ACTIVE_TRANSMEMBRANE_TRANSPORTER_ACTIVITY	-0.115626	0.019631	MF853	Negative
CRTAC1	GO_NUCLEAR_OUTER_MEMBRANE	-0.350421	3.34e-13	CC395	Negative	ATOH8	GO_CARBON_CARBON_LYASE_ACTIVITY	0.113507	0.0220049	MF140	Positive
CRTAC1	GO_PIGMENT_GRANULE	-0.348528	4.56e-13	CC439	Negative	ATOH8	GO_PROTEIN_TYROSINE_SERINE_THREONINE_PHOSPHATASE_ACTIVITY	-0.112999	0.0226101	MF779	Negative
CRTAC1	GO_NEURON_PROJECTION_CYTOPLASM	-0.0337079	0.497688	CC374	Negative	ATOH8	GO_PHOSPHATE_ION_TRANSMEMBRANE_TRANSPORTER_ACTIVITY	0.112892	0.0227389	MF672	Positive
CRTAC1	GO_A_BAND	-0.0833093	0.093259	CC4	Negative	ATOH8	GO_PHOSPHATIDYLINOSITOL_4_PHOSPHATE_BINDING	-0.112771	0.0228854	MF687	Negative
CRTAC1	GO_ENDOPLASMIC_RETICULUM_LUMEN	-0.30039	6.21e-10	CC188	Negative	ATOH8	GO_MYOSIN_HEAVY_CHAIN_BINDING	-0.111476	0.0245095	MF541	Negative
CRTAC1	GO_CORTICAL_CYTOSKELETON	-0.180664	0.000248553	CC136	Negative	ATOH8	GO_G_PROTEIN_COUPLED_AMINE_RECEPTOR_ACTIVITY	-0.110675	0.0255639	MF318	Negative
CRTAC1	GO_IMMUNOGLOBULIN_COMPLEX	-0.180154	0.000258956	CC262	Negative	ATOH8	GO_IRON_ION_BINDING	0.109237	0.0275529	MF435	Positive
CRTAC1	GO_SPERM_PRINCIPAL_PIECE	-0.0638926	0.198326	CC562	Negative	ATOH8	GO_OLIGOSACCHARYL_TRANSFERASE_ACTIVITY	-0.109163	0.027659	MF603	Negative
CRTAC1	GO_CILIARY_TIP	0.0643428	0.195176	CC96	Positive	ATOH8	GO_NUCLEOTIDE_DIPHOSPHATASE_ACTIVITY	0.109062	0.0278042	MF592	Positive
CRTAC1	GO_MICROTUBULE_END	-0.389208	4.44e-16	CC338	Negative	ATOH8	GO_POLYSACCHARIDE_BINDING	-0.108936	0.0279853	MF724	Negative
CRTAC1	GO_LARGE_RIBOSOMAL_SUBUNIT	0.221573	6.41e-06	CC306	Positive	ATOH8	GO_S_ADENOSYLMETHIONINE_DEPENDENT_METHYLTRANSFERASE_ACTIVITY	0.108087	0.0292388	MF848	Positive
CRTAC1	GO_EXTRINSIC_COMPONENT_OF_SYNAPTIC_MEMBRANE	-0.0512595	0.30225	CC217	Negative	ATOH8	GO_ATP_TRANSMEMBRANE_TRANSPORTER_ACTIVITY	0.107878	0.0295536	MF86	Positive
CRTAC1	GO_RETROMER_COMPLEX	-0.0837442	0.0915564	CC506	Negative	ATOH8	GO_MRNA_3_UTR_BINDING	-0.107476	0.0301689	MF535	Negative
CRTAC1	GO_MLL1_2_COMPLEX	-0.107646	0.0299074	CC355	Negative	ATOH8	GO_RNA_POLYMERASE_II_TRANSCRIPTION_FACTOR_BINDING	0.107346	0.0303708	MF842	Positive
CRTAC1	GO_RUFFLE_MEMBRANE	-0.0607748	0.221162	CC524	Negative	ATOH8	GO_MAGNESIUM_DEPENDENT_PROTEIN_SERINE_THREONINE_PHOSPHATASE_ACTIVITY	0.106552	0.0316252	MF484	Positive
CRTAC1	GO_TELOMERASE_HOLOENZYME_COMPLEX	-0.150202	0.00238034	CC582	Negative	ATOH8	GO_SYMPORTER_ACTIVITY	-0.106523	0.0316719	MF924	Negative
CRTAC1	GO_FILOPODIUM	-0.352525	2.36e-13	CC224	Negative	ATOH8	GO_LYSOPHOSPHOLIPID_ACYLTRANSFERASE_ACTIVITY	0.10627	0.0320813	MF482	Positive
CRTAC1	GO_AUTOPHAGOSOME	-0.231177	2.44e-06	CC34	Negative	ATOH8	GO_TYPE_I_INTERFERON_RECEPTOR_BINDING	-0.105882	0.0327177	MF988	Negative
CRTAC1	GO_COP9_SIGNALOSOME	-0.295304	1.24e-09	CC128	Negative	ATOH8	GO_GALACTOSYLTRANSFERASE_ACTIVITY	-0.105846	0.0327785	MF327	Negative
CRTAC1	GO_ER_MEMBRANE_PROTEIN_COMPLEX	-0.171182	0.00052343	CC195	Negative	ATOH8	GO_TRANSLATION_REGULATOR_ACTIVITY_NUCLEIC_ACID_BINDING	-0.105829	0.0328063	MF968	Negative
CRTAC1	GO_EXTRINSIC_COMPONENT_OF_ENDOSOME_MEMBRANE	-0.23797	1.2e-06	CC212	Negative	ATOH8	GO_OXIDOREDUCTASE_ACTIVITY_ACTING_ON_THE_CH_CH_GROUP_OF_DONORS_NAD_OR_NADP_AS_ACCEPTOR	0.105517	0.0333275	MF634	Positive
CRTAC1	GO_ENDOPLASMIC_RETICULUM_GOLGI_INTERMEDIATE_COMPARTMENT_MEMBRANE	-0.357194	1.08e-13	CC187	Negative	ATOH8	GO_AMINE_BINDING	-0.10523	0.0338129	MF56	Negative
CRTAC1	GO_PERICENTRIOLAR_MATERIAL	-0.0162865	0.74323	CC424	Negative	ATOH8	GO_RNA_POLYMERASE_II_GENERAL_TRANSCRIPTION_INITIATION_FACTOR_ACTIVITY	-0.104627	0.0348517	MF837	Negative
CRTAC1	GO_MICROTUBULE	-0.350184	3.47e-13	CC336	Negative	ATOH8	GO_TRANSFERASE_ACTIVITY_TRANSFERRING_ACYL_GROUPS	0.104229	0.0355527	MF948	Positive
CRTAC1	GO_CHAPERONE_COMPLEX	-0.226016	4.12e-06	CC81	Negative	ATOH8	GO_ACTIVATING_TRANSCRIPTION_FACTOR_BINDING	0.103363	0.0371192	MF29	Positive
CRTAC1	GO_PROTON_TRANSPORTING_TWO_SECTOR_ATPASE_COMPLEX_CATALYTIC_DOMAIN	-0.0573144	0.248637	CC490	Negative	ATOH8	GO_TRANSMEMBRANE_RECEPTOR_PROTEIN_TYROSINE_KINASE_ADAPTOR_ACTIVITY	-0.10225	0.0392189	MF977	Negative
CRTAC1	GO_GOLGI_CIS_CISTERNA	0.238942	1.08e-06	CC240	Positive	ATOH8	GO_UBIQUITIN_LIKE_PROTEIN_LIGASE_ACTIVITY	-0.101459	0.0407709	MF995	Negative
CRTAC1	GO_CLATHRIN_COATED_VESICLE	-0.272474	2.32e-08	CC106	Negative	ATOH8	GO_GABA_RECEPTOR_BINDING	-0.101373	0.0409436	MF326	Negative
CRTAC1	GO_TRICARBOXYLIC_ACID_CYCLE_ENZYME_COMPLEX	0.112939	0.0226818	CC611	Positive	ATOH8	GO_HISTONE_METHYLTRANSFERASE_ACTIVITY_H3_K4_SPECIFIC	0.100763	0.0421798	MF381	Positive
CRTAC1	GO_SECONDARY_LYSOSOME	-0.339336	2e-12	CC533	Negative	ATOH8	GO_GUANYL_NUCLEOTIDE_EXCHANGE_FACTOR_ACTIVITY	-0.0984863	0.0470772	MF359	Negative
CRTAC1	GO_IMMUNOLOGICAL_SYNAPSE	-0.310793	1.45e-10	CC264	Negative	ATOH8	GO_HMG_BOX_DOMAIN_BINDING	-0.0983308	0.0474284	MF383	Negative
CRTAC1	GO_MICROFIBRIL	-0.330181	8.3e-12	CC335	Negative	ATOH8	GO_CYCLIC_NUCLEOTIDE_BINDING	-0.097988	0.0482104	MF199	Negative
CRTAC1	GO_DENSE_CORE_GRANULE	0.0111113	0.823162	CC162	Positive	ATOH8	GO_ALDEHYDE_LYASE_ACTIVITY	0.096835	0.05092	MF47	Positive
CRTAC1	GO_POSTSYNAPTIC_DENSITY_MEMBRANE	-0.117731	0.0174973	CC458	Negative	ATOH8	GO_LIGASE_ACTIVITY_FORMING_CARBON_OXYGEN_BONDS	0.0964488	0.0518554	MF458	Positive
CRTAC1	GO_U5_SNRNP	0.084851	0.0873353	CC619	Positive	ATOH8	GO_LIGASE_ACTIVITY	0.0960358	0.0528717	MF456	Positive
CRTAC1	GO_HIPPOCAMPAL_MOSSY_FIBER_TO_CA3_SYNAPSE	-0.106922	0.0310346	CC254	Negative	ATOH8	GO_RNA_POLYMERASE_ACTIVITY	-0.0955243	0.0541532	MF829	Negative
CRTAC1	GO_NUCLEAR_SPECK	0.0350725	0.480436	CC401	Positive	ATOH8	GO_PROTON_TRANSMEMBRANE_TRANSPORTER_ACTIVITY	0.0954667	0.0542991	MF783	Positive
CRTAC1	GO_BLOOD_MICROPARTICLE	-0.306635	2.62e-10	CC52	Negative	ATOH8	GO_PHOSPHATIDYLINOSITOL_BISPHOSPHATE_BINDING	-0.0948839	0.055794	MF690	Negative
CRTAC1	GO_GOLGI_CISTERNA_MEMBRANE	-0.100894	0.0419128	CC242	Negative	ATOH8	GO_4_IRON_4_SULFUR_CLUSTER_BINDING	-0.0933968	0.0597638	MF12	Negative
CRTAC1	GO_PEPTIDASE_COMPLEX	-0.340009	1.8e-12	CC422	Negative	ATOH8	GO_MISMATCHED_DNA_BINDING	-0.0911724	0.0661353	MF520	Negative
CRTAC1	GO_VESICLE_COAT	-0.263487	6.86e-08	CC625	Negative	ATOH8	GO_VITAMIN_BINDING	-0.0909626	0.0667639	MF1009	Negative
CRTAC1	GO_CHOLINERGIC_SYNAPSE	-0.166737	0.000732514	CC84	Negative	ATOH8	GO_CHEMOREPELLENT_ACTIVITY	0.0901037	0.0693891	MF174	Positive
CRTAC1	GO_INTRACILIARY_TRANSPORT_PARTICLE_B	0.0919285	0.0639099	CC278	Positive	ATOH8	GO_PHOSPHATASE_REGULATOR_ACTIVITY	-0.0894061	0.0715826	MF670	Negative
CRTAC1	GO_MALE_GERM_CELL_NUCLEUS	-0.229257	2.96e-06	CC319	Negative	ATOH8	GO_TRANSCRIPTION_COACTIVATOR_BINDING	-0.0893704	0.0716966	MF944	Negative
CRTAC1	GO_ENDOPEPTIDASE_COMPLEX	-0.38052	1.78e-15	CC183	Negative	ATOH8	GO_INSULIN_LIKE_GROWTH_FACTOR_BINDING	-0.0893559	0.0717428	MF412	Negative
CRTAC1	GO_LYSOSOMAL_LUMEN	-0.285837	4.31e-09	CC316	Negative	ATOH8	GO_METAL_CLUSTER_BINDING	-0.0876917	0.0772153	MF497	Negative
CRTAC1	GO_CENTRIOLAR_SATELLITE	-0.268126	3.94e-08	CC79	Negative	ATOH8	GO_ORGANIC_ANION_TRANSMEMBRANE_TRANSPORTER_ACTIVITY	0.0873474	0.0783885	MF609	Positive
CRTAC1	GO_EUCHROMATIN	-0.0844112	0.0889934	CC201	Negative	ATOH8	GO_HEXOSAMINIDASE_ACTIVITY	-0.0870634	0.0793673	MF367	Negative
CRTAC1	GO_DENDRITIC_SHAFT	-0.232167	2.2e-06	CC159	Negative	ATOH8	GO_OXIDOREDUCTASE_ACTIVITY_ACTING_ON_PAIRED_DONORS_WITH_INCORPORATION_OR_REDUCTION_OF_MOLECULAR_OXYGEN	0.0861771	0.0824856	MF626	Positive
CRTAC1	GO_CELL_CELL_CONTACT_ZONE	-0.302545	4.62e-10	CC70	Negative	ATOH8	GO_FILAMIN_BINDING	-0.0861467	0.0825945	MF308	Negative
CRTAC1	GO_PML_BODY	-0.19227	9.48e-05	CC449	Negative	ATOH8	GO_ACETYLGLUCOSAMINYLTRANSFERASE_ACTIVITY	0.0844356	0.088901	MF20	Positive
CRTAC1	GO_PROTON_TRANSPORTING_V_TYPE_ATPASE_COMPLEX	-0.134482	0.00658591	CC492	Negative	ATOH8	GO_METALLOAMINOPEPTIDASE_ACTIVITY	-0.0840861	0.0902354	MF500	Negative
CRTAC1	GO_MYOSIN_II_COMPLEX	-0.184321	0.000184615	CC368	Negative	ATOH8	GO_PEROXISOME_PROLIFERATOR_ACTIVATED_RECEPTOR_BINDING	-0.0840753	0.090277	MF665	Negative
CRTAC1	GO_PLATELET_ALPHA_GRANULE_MEMBRANE	-0.217113	9.9e-06	CC445	Negative	ATOH8	GO_UBIQUITIN_SPECIFIC_PROTEASE_BINDING	-0.0837363	0.0915871	MF1000	Negative
CRTAC1	GO_MKS_COMPLEX	0.135124	0.00633017	CC354	Positive	ATOH8	GO_THYROID_HORMONE_RECEPTOR_BINDING	-0.0829414	0.0947188	MF939	Negative
CRTAC1	GO_CONTRACTILE_FIBER	-0.291781	1.98e-09	CC126	Negative	ATOH8	GO_TRANSLATION_FACTOR_ACTIVITY_RNA_BINDING	-0.0829252	0.0947836	MF964	Negative
CRTAC1	GO_NEURON_SPINE	-0.287738	3.37e-09	CC377	Negative	ATOH8	GO_TRANSFERASE_ACTIVITY_TRANSFERRING_NITROGENOUS_GROUPS	0.082565	0.0962317	MF953	Positive
CRTAC1	GO_COPI_COATED_VESICLE_MEMBRANE	-0.300072	6.49e-10	CC130	Negative	ATOH8	GO_LRR_DOMAIN_BINDING	-0.0821913	0.097752	MF475	Negative
CRTAC1	GO_ENDOPLASMIC_RETICULUM_EXIT_SITE	-0.240927	8.73e-07	CC185	Negative	ATOH8	GO_GABA_RECEPTOR_ACTIVITY	-0.0818362	0.0992147	MF325	Negative
CRTAC1	GO_GEMINI_OF_COILED_BODIES	-0.0443968	0.371666	CC233	Negative	ATOH8	GO_3_5_EXODEOXYRIBONUCLEASE_ACTIVITY	-0.0813748	0.101141	MF10	Negative
CRTAC1	GO_DISTAL_AXON	-0.296962	9.9e-10	CC165	Negative	ATOH8	GO_NAD_BINDING	0.0803744	0.10542	MF548	Positive
CRTAC1	GO_PLATELET_DENSE_GRANULE_LUMEN	-0.160887	0.00112581	CC447	Negative	ATOH8	GO_HISTONE_ACETYLTRANSFERASE_BINDING	-0.0802279	0.106059	MF372	Negative
CRTAC1	GO_ORGANELLE_MEMBRANE_CONTACT_SITE	-0.190497	0.000110285	CC412	Negative	ATOH8	GO_STORE_OPERATED_CALCIUM_CHANNEL_ACTIVITY	-0.079955	0.107256	MF902	Negative
CRTAC1	GO_BASAL_PLASMA_MEMBRANE	0.0220946	0.656735	CC45	Positive	ATOH8	GO_QUATERNARY_AMMONIUM_GROUP_TRANSMEMBRANE_TRANSPORTER_ACTIVITY	-0.0799242	0.107392	MF790	Negative
CRTAC1	GO_CORNIFIED_ENVELOPE	-0.294971	1.29e-09	CC134	Negative	ATOH8	GO_PHOSPHOTRANSFERASE_ACTIVITY_PHOSPHATE_GROUP_AS_ACCEPTOR	0.0797858	0.108004	MF714	Positive
CRTAC1	GO_PRONUCLEUS	-0.247529	4.25e-07	CC477	Negative	ATOH8	GO_BITTER_TASTE_RECEPTOR_ACTIVITY	0.0795306	0.109139	MF107	Positive
CRTAC1	GO_MYOSIN_FILAMENT	-0.309685	1.7e-10	CC367	Negative	ATOH8	GO_RETINAL_BINDING	-0.0791113	0.111026	MF810	Negative
CRTAC1	GO_MAST_CELL_GRANULE	-0.356212	1.28e-13	CC321	Negative	ATOH8	GO_DIOXYGENASE_ACTIVITY	-0.0786986	0.112907	MF234	Negative
CRTAC1	GO_U12_TYPE_SPLICEOSOMAL_COMPLEX	0.155098	0.00169886	CC614	Positive	ATOH8	GO_GLUCOSYLTRANSFERASE_ACTIVITY	0.0786061	0.113332	MF339	Positive
CRTAC1	GO_CUL4A_RING_E3_UBIQUITIN_LIGASE_COMPLEX	0.0828682	0.0950115	CC141	Positive	ATOH8	GO_SODIUM_CHANNEL_ACTIVITY	0.0774618	0.118696	MF878	Positive
CRTAC1	GO_U4_SNRNP	0.182277	0.000218157	CC618	Positive	ATOH8	GO_3_5_EXONUCLEASE_ACTIVITY	-0.0774256	0.118869	MF11	Negative
CRTAC1	GO_INTERCELLULAR_BRIDGE	-0.177919	0.000309566	CC274	Negative	ATOH8	GO_DOPAMINE_BINDING	0.0771493	0.120194	MF253	Positive
CRTAC1	GO_SMALL_NUCLEOLAR_RIBONUCLEOPROTEIN_COMPLEX	0.0489702	0.324384	CC547	Positive	ATOH8	GO_CALCIUM_TRANSMEMBRANE_TRANSPORTER_ACTIVITY_PHOSPHORYLATIVE_MECHANISM	-0.0770907	0.120477	MF128	Negative
CRTAC1	GO_EXTERNAL_SIDE_OF_PLASMA_MEMBRANE	-0.306142	2.8e-10	CC210	Negative	ATOH8	GO_CALCIUM_ION_TRANSMEMBRANE_TRANSPORTER_ACTIVITY	-0.0770409	0.120718	MF126	Negative
CRTAC1	GO_RNAI_EFFECTOR_COMPLEX	0.0388594	0.434307	CC520	Positive	ATOH8	GO_BENZODIAZEPINE_RECEPTOR_ACTIVITY	0.0767619	0.122073	MF98	Positive
CRTAC1	GO_COMPLEX_OF_COLLAGEN_TRIMERS	-0.352536	2.36e-13	CC118	Negative	ATOH8	GO_PROTEIN_METHYLTRANSFERASE_ACTIVITY	0.0761353	0.125159	MF761	Positive
CRTAC1	GO_DESMOSOME	-0.160303	0.00117424	CC163	Negative	ATOH8	GO_2_IRON_2_SULFUR_CLUSTER_BINDING	-0.076021	0.125728	MF5	Negative
CRTAC1	GO_SPERM_HEAD	0.0268453	0.589186	CC560	Positive	ATOH8	GO_SECONDARY_ACTIVE_MONOCARBOXYLATE_TRANSMEMBRANE_TRANSPORTER_ACTIVITY	0.0756382	0.12765	MF852	Positive
CRTAC1	GO_GOLGI_LUMEN	-0.223003	5.56e-06	CC243	Negative	ATOH8	GO_TRANSMEMBRANE_RECEPTOR_PROTEIN_PHOSPHATASE_ACTIVITY	0.0750858	0.130464	MF973	Positive
CRTAC1	GO_CYTOPLASMIC_SIDE_OF_MEMBRANE	-0.298602	7.93e-10	CC150	Negative	ATOH8	GO_CALMODULIN_DEPENDENT_PROTEIN_KINASE_ACTIVITY	-0.0747616	0.132137	MF130	Negative
CRTAC1	GO_ANCHORED_COMPONENT_OF_SYNAPTIC_VESICLE_MEMBRANE	0.265857	5.17e-08	CC22	Positive	ATOH8	GO_DEOXYRIBONUCLEASE_ACTIVITY	-0.0746847	0.132536	MF230	Negative
CRTAC1	GO_CYTOSOLIC_RIBOSOME	0.307864	2.2e-10	CC154	Positive	ATOH8	GO_ACTIVE_TRANSMEMBRANE_TRANSPORTER_ACTIVITY	-0.0743286	0.134398	MF31	Negative
CRTAC1	GO_COLLAGEN_TRIMER	-0.310886	1.43e-10	CC116	Negative	ATOH8	GO_OMEGA_PEPTIDASE_ACTIVITY	0.0701105	0.158005	MF604	Positive
CRTAC1	GO_ACTIN_FILAMENT	-0.36152	5.2e-14	CC10	Negative	ATOH8	GO_PROTEIN_SERINE_THREONINE_KINASE_INHIBITOR_ACTIVITY	0.0699535	0.15894	MF771	Positive
CRTAC1	GO_SAGA_COMPLEX	0.0820189	0.0984602	CC525	Positive	ATOH8	GO_SODIUM_ION_TRANSMEMBRANE_TRANSPORTER_ACTIVITY	-0.0696256	0.160907	MF882	Negative
CRTAC1	GO_SET1C_COMPASS_COMPLEX	0.0328413	0.508812	CC538	Positive	ATOH8	GO_CARBOHYDRATE_TRANSMEMBRANE_TRANSPORTER_ACTIVITY	0.0695973	0.161078	MF139	Positive
CRTAC1	GO_CONTRACTILE_RING	-0.310073	1.61e-10	CC127	Negative	ATOH8	GO_PALMITOYL_COA_HYDROLASE_ACTIVITY	-0.0660173	0.183781	MF644	Negative
CRTAC1	GO_VACUOLAR_MEMBRANE	-0.247079	4.47e-07	CC623	Negative	ATOH8	GO_PROTEIN_KINASE_C_ACTIVITY	-0.065294	0.188642	MF757	Negative
CRTAC1	GO_RECYCLING_ENDOSOME_MEMBRANE	0.0154547	0.755917	CC498	Positive	ATOH8	GO_GLUTAMATE_BINDING	0.06521	0.189212	MF341	Positive
CRTAC1	GO_INTEGRAL_COMPONENT_OF_SYNAPTIC_VESICLE_MEMBRANE	0.100272	0.0431984	CC271	Positive	ATOH8	GO_OXIDOREDUCTASE_ACTIVITY_ACTING_ON_PAIRED_DONORS_WITH_INCORPORATION_OR_REDUCTION_OF_MOLECULAR_OXYGEN_NAD_P_H_AS_ONE_DONOR_AND_INCORPORATION_OF_ONE_ATOM_OF_OXYGEN	0.0643154	0.195367	MF627	Positive
CRTAC1	GO_SEMAPHORIN_RECEPTOR_COMPLEX	-0.216553	1.04e-05	CC536	Negative	ATOH8	GO_MONOCARBOXYLIC_ACID_TRANSMEMBRANE_TRANSPORTER_ACTIVITY	0.0642983	0.195486	MF530	Positive
CRTAC1	GO_RNA_POLYMERASE_II_CORE_COMPLEX	0.170702	0.000542965	CC515	Positive	ATOH8	GO_MYOSIN_BINDING	-0.0640526	0.197202	MF540	Negative
CRTAC1	GO_SYNAPTIC_MEMBRANE	-0.251054	2.87e-07	CC577	Negative	ATOH8	GO_PEPTIDE_HORMONE_BINDING	-0.0636185	0.200262	MF657	Negative
CRTAC1	GO_SEH1_ASSOCIATED_COMPLEX	0.358268	9.02e-14	CC535	Positive	ATOH8	GO_TRANSCRIPTION_COFACTOR_BINDING	-0.0627805	0.206266	MF945	Negative
CRTAC1	GO_REPLISOME	-0.331287	7.01e-12	CC501	Negative	ATOH8	GO_LAMIN_BINDING	-0.0622349	0.210244	MF447	Negative
CRTAC1	GO_MIDBODY	-0.315704	7.18e-11	CC343	Negative	ATOH8	GO_RNA_POLYMERASE_II_CORE_PROMOTER_SEQUENCE_SPECIFIC_DNA_BINDING	-0.0618492	0.21309	MF835	Negative
CRTAC1	GO_SPINDLE_MIDZONE	-0.334915	4e-12	CC565	Negative	ATOH8	GO_RNA_POLYMERASE_CORE_ENZYME_BINDING	0.0616999	0.214198	MF831	Positive
CRTAC1	GO_INTEGRAL_COMPONENT_OF_PRESYNAPTIC_ACTIVE_ZONE_MEMBRANE	-0.125892	0.0110195	CC270	Negative	ATOH8	GO_LYSINE_N_METHYLTRANSFERASE_ACTIVITY	0.0612371	0.217662	MF480	Positive
CRTAC1	GO_MISMATCH_REPAIR_COMPLEX	-0.0093326	0.851109	CC344	Negative	ATOH8	GO_NUCLEAR_RECEPTOR_BINDING	-0.0608753	0.220397	MF578	Negative
CRTAC1	GO_TELOMERE_CAP_COMPLEX	0.0162015	0.744523	CC583	Positive	ATOH8	GO_TRNA_GUANINE_METHYLTRANSFERASE_ACTIVITY	0.0598329	0.228416	MF981	Positive
CRTAC1	GO_RNA_POLYMERASE_I_COMPLEX	-0.0350582	0.480614	CC514	Negative	ATOH8	GO_MAGNESIUM_ION_TRANSMEMBRANE_TRANSPORTER_ACTIVITY	0.0567452	0.253375	MF486	Positive
CRTAC1	GO_BETA_CATENIN_DESTRUCTION_COMPLEX	-0.183764	0.000193236	CC48	Negative	ATOH8	GO_CULLIN_FAMILY_PROTEIN_BINDING	0.0567176	0.253606	MF196	Positive
CRTAC1	GO_TRAPP_COMPLEX	0.262508	7.69e-08	CC610	Positive	ATOH8	GO_RAL_GTPASE_BINDING	-0.0566269	0.254367	MF800	Negative
CRTAC1	GO_ER_TO_GOLGI_TRANSPORT_VESICLE_MEMBRANE	-0.364234	3.24e-14	CC196	Negative	ATOH8	GO_DIACYLGLYCEROL_BINDING	-0.0565563	0.254961	MF231	Negative
CRTAC1	GO_SNARE_COMPLEX	-0.246763	4.63e-07	CC553	Negative	ATOH8	GO_AU_RICH_ELEMENT_BINDING	-0.0565248	0.255226	MF95	Negative
CRTAC1	GO_ANAPHASE_PROMOTING_COMPLEX	-0.132452	0.00745741	CC17	Negative	ATOH8	GO_DOPAMINE_RECEPTOR_BINDING	-0.0556559	0.262615	MF255	Negative
CRTAC1	GO_NUCLEAR_CYCLIN_DEPENDENT_PROTEIN_KINASE_HOLOENZYME_COMPLEX	0.00275173	0.955865	CC385	Positive	ATOH8	GO_POTASSIUM_ION_LEAK_CHANNEL_ACTIVITY	-0.0555074	0.263893	MF731	Negative
CRTAC1	GO_DENDRITE_MEMBRANE	-0.176878	0.000336162	CC157	Negative	ATOH8	GO_RETINOL_BINDING	-0.0549178	0.269007	MF814	Negative
CRTAC1	GO_CLUSTER_OF_ACTIN_BASED_CELL_PROJECTIONS	-0.0999771	0.0438196	CC111	Negative	ATOH8	GO_PHOSPHOLIPASE_ACTIVITY	-0.0546882	0.271017	MF701	Negative
CRTAC1	GO_CD40_RECEPTOR_COMPLEX	-0.21051	1.85e-05	CC68	Negative	ATOH8	GO_NUCLEOBASE_CONTAINING_COMPOUND_TRANSMEMBRANE_TRANSPORTER_ACTIVITY	-0.0545944	0.271841	MF582	Negative
CRTAC1	GO_CHROMOSOMAL_REGION	-0.300731	5.93e-10	CC87	Negative	ATOH8	GO_SUMO_TRANSFERASE_ACTIVITY	-0.0541422	0.275837	MF921	Negative
CRTAC1	GO_KERATIN_FILAMENT	-0.00919501	0.85328	CC298	Negative	ATOH8	GO_U6_SNRNA_BINDING	-0.0539434	0.277607	MF989	Negative
CRTAC1	GO_SYNAPTONEMAL_STRUCTURE	-0.255986	1.64e-07	CC579	Negative	ATOH8	GO_LYASE_ACTIVITY	-0.0534626	0.281918	MF476	Negative
CRTAC1	GO_MICROBODY_MEMBRANE	0.339706	1.88e-12	CC334	Positive	ATOH8	GO_RAB_GTPASE_BINDING	-0.0524487	0.291158	MF793	Negative
CRTAC1	GO_ACROSOMAL_VESICLE	-0.217074	9.93e-06	CC7	Negative	ATOH8	GO_PHOSPHOLIPID_TRANSPORTER_ACTIVITY	-0.0524117	0.291499	MF707	Negative
CRTAC1	GO_RNA_POLYMERASE_II_TRANSCRIPTION_FACTOR_COMPLEX	-0.0709706	0.152953	CC517	Negative	ATOH8	GO_NADPLUS_KINASE_ACTIVITY	-0.0521115	0.294275	MF556	Negative
CRTAC1	GO_MULTIVESICULAR_BODY	-0.0549818	0.268449	CC361	Negative	ATOH8	GO_INHIBITORY_EXTRACELLULAR_LIGAND_GATED_ION_CHANNEL_ACTIVITY	-0.0495374	0.318804	MF407	Negative
CRTAC1	GO_CONDENSED_CHROMOSOME	-0.313887	9.33e-11	CC119	Negative	ATOH8	GO_MAP_KINASE_KINASE_KINASE_ACTIVITY	-0.0488329	0.325743	MF493	Negative
CRTAC1	GO_GLUTAMATERGIC_SYNAPSE	-0.21889	8.33e-06	CC236	Negative	ATOH8	GO_INSULIN_LIKE_GROWTH_FACTOR_RECEPTOR_BINDING	-0.0486485	0.327576	MF414	Negative
CRTAC1	GO_MANCHETTE	-0.0727255	0.143028	CC320	Negative	ATOH8	GO_NADPLUS_ADP_RIBOSYLTRANSFERASE_ACTIVITY	-0.0485005	0.329051	MF554	Negative
CRTAC1	GO_CAJAL_BODY	-0.103687	0.0365273	CC56	Negative	ATOH8	GO_HYDROLASE_ACTIVITY_ACTING_ON_CARBON_NITROGEN_BUT_NOT_PEPTIDE_BONDS	0.0480547	0.333522	MF392	Positive
CRTAC1	GO_HEMOGLOBIN_COMPLEX	0.0911098	0.0663222	CC250	Positive	ATOH8	GO_CORE_PROMOTER_SEQUENCE_SPECIFIC_DNA_BINDING	0.0475753	0.338372	MF194	Positive
CRTAC1	GO_90S_PRERIBOSOME	-0.0458837	0.355847	CC1	Negative	ATOH8	GO_MRNA_METHYLTRANSFERASE_ACTIVITY	0.0474006	0.340151	MF538	Positive
CRTAC1	GO_DENDRITE_CYTOPLASM	0.00983542	0.843188	CC156	Positive	ATOH8	GO_ENDODEOXYRIBONUCLEASE_ACTIVITY_PRODUCING_3_PHOSPHOMONOESTERS	-0.0472342	0.341852	MF268	Negative
CRTAC1	GO_NUCLEAR_UBIQUITIN_LIGASE_COMPLEX	-0.0591545	0.233744	CC404	Negative	ATOH8	GO_PROSTANOID_RECEPTOR_ACTIVITY	-0.0453478	0.361499	MF740	Negative
CRTAC1	GO_H4_H2A_HISTONE_ACETYLTRANSFERASE_COMPLEX	-0.0153696	0.75722	CC247	Negative	ATOH8	GO_OXIDOREDUCTASE_ACTIVITY_ACTING_ON_NAD_P_H_HEME_PROTEIN_AS_ACCEPTOR	-0.0452417	0.362624	MF623	Negative
CRTAC1	GO_ENDOCYTIC_VESICLE_MEMBRANE	-0.401397	<2E-16	CC179	Negative	ATOH8	GO_E_BOX_BINDING	-0.0450224	0.364958	MF264	Negative
CRTAC1	GO_EXTRINSIC_COMPONENT_OF_MEMBRANE	-0.299989	6.56e-10	CC213	Negative	ATOH8	GO_TRANSFERASE_ACTIVITY_TRANSFERRING_AMINO_ACYL_GROUPS	0.0449001	0.366263	MF950	Positive
CRTAC1	GO_CIS_GOLGI_NETWORK	-0.022321	0.653446	CC98	Negative	ATOH8	GO_EFFLUX_TRANSMEMBRANE_TRANSPORTER_ACTIVITY	0.0444185	0.371432	MF265	Positive
CRTAC1	GO_DOPAMINERGIC_SYNAPSE	-0.184955	0.000175239	CC171	Negative	ATOH8	GO_RNA_POLYMERASE_II_ACTIVATING_TRANSCRIPTION_FACTOR_BINDING	0.0436478	0.379797	MF833	Positive
CRTAC1	GO_OUTER_MEMBRANE	-0.00148425	0.976186	CC414	Negative	ATOH8	GO_GABA_GATED_CHLORIDE_ION_CHANNEL_ACTIVITY	-0.043456	0.381896	MF324	Negative
CRTAC1	GO_COPI_COATED_VESICLE	-0.260972	9.22e-08	CC129	Negative	ATOH8	GO_UDP_GLYCOSYLTRANSFERASE_ACTIVITY	-0.043329	0.38329	MF1003	Negative
CRTAC1	GO_TRANSPORT_VESICLE_MEMBRANE	-0.222013	6.13e-06	CC608	Negative	ATOH8	GO_NADP_BINDING	-0.0432397	0.384272	MF551	Negative
CRTAC1	GO_BASEMENT_MEMBRANE	-0.247677	4.18e-07	CC46	Negative	ATOH8	GO_UBIQUITIN_LIKE_PROTEIN_CONJUGATING_ENZYME_BINDING	-0.0431179	0.385614	MF994	Negative
CRTAC1	GO_LATE_ENDOSOME_MEMBRANE	-0.16357	0.000926026	CC308	Negative	ATOH8	GO_OXIDOREDUCTASE_ACTIVITY_ACTING_ON_THE_ALDEHYDE_OR_OXO_GROUP_OF_DONORS	0.0425223	0.392217	MF631	Positive
CRTAC1	GO_POSTSYNAPTIC_CYTOSOL	-0.331999	6.28e-12	CC456	Negative	ATOH8	GO_CHROMATIN_DNA_BINDING	-0.0421966	0.395856	MF180	Negative
CRTAC1	GO_CHROMOSOME_CENTROMERIC_REGION	-0.347855	5.09e-13	CC88	Negative	ATOH8	GO_FIBROBLAST_GROWTH_FACTOR_BINDING	-0.0416086	0.402479	MF305	Negative
CRTAC1	GO_CLATHRIN_COATED_VESICLE_MEMBRANE	-0.382765	1.33e-15	CC107	Negative	ATOH8	GO_H4_HISTONE_ACETYLTRANSFERASE_ACTIVITY	0.0414865	0.403862	MF360	Positive
CRTAC1	GO_GLIAL_CELL_PROJECTION	-0.320004	3.83e-11	CC235	Negative	ATOH8	GO_MODIFIED_AMINO_ACID_TRANSMEMBRANE_TRANSPORTER_ACTIVITY	0.0412138	0.406961	MF526	Positive
CRTAC1	GO_COHESIN_COMPLEX	-0.2323	2.17e-06	CC114	Negative	ATOH8	GO_VOLTAGE_GATED_SODIUM_CHANNEL_ACTIVITY	0.0406795	0.413076	MF1020	Positive
CRTAC1	GO_PARANODE_REGION_OF_AXON	-0.15696	0.00149054	CC420	Negative	ATOH8	GO_FLAVIN_ADENINE_DINUCLEOTIDE_BINDING	0.0401663	0.418999	MF309	Positive
CRTAC1	GO_VACUOLAR_PROTON_TRANSPORTING_V_TYPE_ATPASE_COMPLEX	-0.210604	1.84e-05	CC624	Negative	ATOH8	GO_TITIN_BINDING	-0.0398122	0.423115	MF940	Negative
CRTAC1	GO_SARCOPLASM	-0.268633	3.71e-08	CC528	Negative	ATOH8	GO_MAP_KINASE_PHOSPHATASE_ACTIVITY	0.039795	0.423315	MF494	Positive
CRTAC1	GO_LIPID_DROPLET	0.0173303	0.727407	CC312	Positive	ATOH8	GO_ANTIOXIDANT_ACTIVITY	0.039033	0.432255	MF74	Positive
CRTAC1	GO_REGION_OF_CYTOSOL	-0.321356	3.13e-11	CC499	Negative	ATOH8	GO_ALPHA_TUBULIN_BINDING	-0.0385144	0.4384	MF53	Negative
CRTAC1	GO_CYCLIN_DEPENDENT_PROTEIN_KINASE_HOLOENZYME_COMPLEX	-0.278004	1.17e-08	CC143	Negative	ATOH8	GO_PROTEIN_KINASE_A_CATALYTIC_SUBUNIT_BINDING	-0.0382031	0.442113	MF754	Negative
CRTAC1	GO_SARCOPLASMIC_RETICULUM_MEMBRANE	-0.233596	1.9e-06	CC529	Negative	ATOH8	GO_PROTEIN_HORMONE_RECEPTOR_ACTIVITY	-0.038113	0.443192	MF752	Negative
CRTAC1	GO_MICROBODY_LUMEN	0.320644	3.48e-11	CC333	Positive	ATOH8	GO_TELOMERIC_DNA_BINDING	-0.0377635	0.447388	MF933	Negative
CRTAC1	GO_IMMUNOGLOBULIN_COMPLEX_CIRCULATING	-0.181875	0.000225389	CC263	Negative	ATOH8	GO_PDZ_DOMAIN_BINDING	0.0369901	0.456751	MF649	Positive
CRTAC1	GO_SMOOTH_ENDOPLASMIC_RETICULUM	-0.0727912	0.142666	CC552	Negative	ATOH8	GO_DNA_APURINIC_OR_APYRIMIDINIC_SITE_ENDONUCLEASE_ACTIVITY	0.0359447	0.469582	MF240	Positive
CRTAC1	GO_ROUGH_ENDOPLASMIC_RETICULUM	-0.282006	7.05e-09	CC521	Negative	ATOH8	GO_DEATH_RECEPTOR_BINDING	0.0356831	0.472822	MF227	Positive
CRTAC1	GO_TRANSCRIPTION_ELONGATION_FACTOR_COMPLEX	0.00442403	0.9291	CC597	Positive	ATOH8	GO_CHLORIDE_CHANNEL_INHIBITOR_ACTIVITY	-0.035145	0.479528	MF175	Negative
CRTAC1	GO_SERINE_THREONINE_PROTEIN_KINASE_COMPLEX	-0.256528	1.54e-07	CC537	Negative	ATOH8	GO_WNT_ACTIVATED_RECEPTOR_ACTIVITY	-0.0348879	0.48275	MF1023	Negative
CRTAC1	GO_ORGANELLAR_RIBOSOME	0.0605724	0.222706	CC409	Positive	ATOH8	GO_DOPAMINE_NEUROTRANSMITTER_RECEPTOR_ACTIVITY	-0.0348693	0.482984	MF254	Negative
CRTAC1	GO_AZUROPHIL_GRANULE_LUMEN	-0.371286	9.33e-15	CC42	Negative	ATOH8	GO_ANION_CHANNEL_ACTIVITY	-0.0343371	0.489692	MF68	Negative
CRTAC1	GO_HETEROTRIMERIC_G_PROTEIN_COMPLEX	-0.339956	1.81e-12	CC252	Negative	ATOH8	GO_HYDROLASE_ACTIVITY_ACTING_ON_GLYCOSYL_BONDS	0.0341844	0.491626	MF398	Positive
CRTAC1	GO_INTRINSIC_COMPONENT_OF_GOLGI_MEMBRANE	-0.18206	0.000222033	CC281	Negative	ATOH8	GO_MITOGEN_ACTIVATED_PROTEIN_KINASE_KINASE_KINASE_BINDING	-0.0338217	0.496236	MF523	Negative
CRTAC1	GO_UBIQUITIN_LIGASE_COMPLEX	-0.101221	0.0412479	CC620	Negative	ATOH8	GO_VOLTAGE_GATED_CALCIUM_CHANNEL_ACTIVITY	0.0324886	0.513376	MF1013	Positive
CRTAC1	GO_ADA2_GCN5_ADA3_TRANSCRIPTION_ACTIVATOR_COMPLEX	-0.14417	0.00355902	CC13	Negative	ATOH8	GO_GTP_DEPENDENT_PROTEIN_BINDING	-0.0324687	0.513635	MF352	Negative
CRTAC1	GO_CUL4_RING_E3_UBIQUITIN_LIGASE_COMPLEX	0.0995337	0.0447682	CC140	Positive	ATOH8	GO_N_ACETYLTRANSFERASE_ACTIVITY	0.0323912	0.514641	MF545	Positive
CRTAC1	GO_CLATHRIN_ADAPTOR_COMPLEX	0.174148	0.000416354	CC99	Positive	ATOH8	GO_LIPASE_ACTIVITY	0.0319099	0.520911	MF461	Positive
CRTAC1	GO_TRANSLATION_PREINITIATION_COMPLEX	0.0651807	0.189411	CC606	Positive	ATOH8	GO_EXORIBONUCLEASE_ACTIVITY	-0.0315893	0.525109	MF290	Negative
CRTAC1	GO_POSTSYNAPTIC_DENSITY_INTRACELLULAR_COMPONENT	-0.00353949	0.943249	CC457	Negative	ATOH8	GO_POTASSIUM_ION_ANTIPORTER_ACTIVITY	-0.0314049	0.527532	MF729	Negative
CRTAC1	GO_CLATHRIN_COAT	-0.0785758	0.113472	CC100	Negative	ATOH8	GO_RNA_POLYMERASE_I_ACTIVITY	-0.0312289	0.529849	MF832	Negative
CRTAC1	GO_ENDOCYTIC_PATCH	-0.201937	4.07e-05	CC176	Negative	ATOH8	GO_NUCLEOTIDE_TRANSMEMBRANE_TRANSPORTER_ACTIVITY	0.0312223	0.529937	MF595	Positive
CRTAC1	GO_CONDENSED_NUCLEAR_CHROMOSOME_KINETOCHORE	-0.35741	1.04e-13	CC124	Negative	ATOH8	GO_HSP90_PROTEIN_BINDING	-0.0304223	0.540538	MF388	Negative
CRTAC1	GO_ACTIN_FILAMENT_BUNDLE	-0.200346	4.69e-05	CC11	Negative	ATOH8	GO_SOLUTE_PROTON_SYMPORTER_ACTIVITY	0.0300308	0.545763	MF890	Positive
CRTAC1	GO_CELL_SUBSTRATE_JUNCTION	-0.281157	7.86e-09	CC77	Negative	ATOH8	GO_RHO_GUANYL_NUCLEOTIDE_EXCHANGE_FACTOR_ACTIVITY	-0.0299806	0.546435	MF817	Negative
CRTAC1	GO_TERTIARY_GRANULE_LUMEN	-0.264757	5.9e-08	CC586	Negative	ATOH8	GO_ORGANIC_ACID_SODIUM_SYMPORTER_ACTIVITY	0.0283292	0.568762	MF607	Positive
CRTAC1	GO_NEURON_PROJECTION_MEMBRANE	-0.23363	1.89e-06	CC375	Negative	ATOH8	GO_HYDROLASE_ACTIVITY_HYDROLYZING_N_GLYCOSYL_COMPOUNDS	-0.0281714	0.570917	MF399	Negative
CRTAC1	GO_CELL_CORTEX_REGION	-0.214522	1.27e-05	CC73	Negative	ATOH8	GO_LIGASE_ACTIVITY_FORMING_CARBON_NITROGEN_BONDS	-0.0279331	0.57418	MF457	Negative
CRTAC1	GO_EXOCYST	0.218424	8.72e-06	CC206	Positive	ATOH8	GO_TRNA_SPECIFIC_RIBONUCLEASE_ACTIVITY	0.0276585	0.577951	MF983	Positive
CRTAC1	GO_PRC1_COMPLEX	0.126797	0.010452	CC465	Positive	ATOH8	GO_TRANSCRIPTION_COACTIVATOR_ACTIVITY	-0.0276534	0.578021	MF943	Negative
CRTAC1	GO_TRANSCRIPTIONALLY_ACTIVE_CHROMATIN	-0.0786759	0.113011	CC604	Negative	ATOH8	GO_RNA_POLYMERASE_III_REGULATORY_REGION_DNA_BINDING	0.0256094	0.606452	MF844	Positive
CRTAC1	GO_GABA_RECEPTOR_COMPLEX	-0.0800087	0.10702	CC230	Negative	ATOH8	GO_HISTONE_METHYLTRANSFERASE_ACTIVITY	0.0253593	0.609972	MF380	Positive
CRTAC1	GO_ORGANELLE_ENVELOPE_LUMEN	-0.0660574	0.183514	CC410	Negative	ATOH8	GO_CYTIDINE_DEAMINASE_ACTIVITY	-0.0246155	0.620497	MF216	Negative
CRTAC1	GO_POTASSIUM_CHANNEL_COMPLEX	-0.233927	1.83e-06	CC464	Negative	ATOH8	GO_ACTIVIN_BINDING	-0.022995	0.643694	MF32	Negative
CRTAC1	GO_PRESYNAPTIC_ACTIVE_ZONE_CYTOPLASMIC_COMPONENT	-0.0989793	0.0459782	CC473	Negative	ATOH8	GO_HYDROLASE_ACTIVITY_HYDROLYZING_O_GLYCOSYL_COMPOUNDS	0.0229693	0.644064	MF400	Positive
CRTAC1	GO_NODE_OF_RANVIER	-0.234859	1.66e-06	CC381	Negative	ATOH8	GO_TASTE_RECEPTOR_ACTIVITY	0.0227048	0.647886	MF927	Positive
CRTAC1	GO_LATE_ENDOSOME	-0.182902	0.000207335	CC307	Negative	ATOH8	GO_INSULIN_RECEPTOR_SUBSTRATE_BINDING	-0.0222873	0.653935	MF416	Negative
CRTAC1	GO_SPINDLE_POLE_CENTROSOME	-0.280164	8.91e-09	CC567	Negative	ATOH8	GO_INOSITOL_PHOSPHATE_PHOSPHATASE_ACTIVITY	0.0200386	0.686903	MF411	Positive
CRTAC1	GO_CLATHRIN_COATED_PIT	-0.285955	4.25e-09	CC105	Negative	ATOH8	GO_PEPTIDASE_ACTIVATOR_ACTIVITY_INVOLVED_IN_APOPTOTIC_PROCESS	0.0200356	0.686949	MF651	Positive
CRTAC1	GO_EXTRINSIC_COMPONENT_OF_CYTOPLASMIC_SIDE_OF_PLASMA_MEMBRANE	-0.333163	5.25e-12	CC211	Negative	ATOH8	GO_VOLTAGE_GATED_CHLORIDE_CHANNEL_ACTIVITY	0.0183901	0.711459	MF1015	Positive
CRTAC1	GO_NURD_COMPLEX	0.204047	3.36e-05	CC407	Positive	ATOH8	GO_MYOSIN_V_BINDING	-0.0177741	0.720715	MF543	Negative
CRTAC1	GO_COPII_VESICLE_COAT	-0.193804	8.31e-05	CC133	Negative	ATOH8	GO_PHOSPHATIDIC_ACID_BINDING	-0.0172835	0.728115	MF673	Negative
CRTAC1	GO_INTRINSIC_COMPONENT_OF_MITOCHONDRIAL_MEMBRANE	0.135386	0.00622835	CC283	Positive	ATOH8	GO_DEAMINASE_ACTIVITY	-0.0168156	0.735195	MF224	Negative
CRTAC1	GO_NEUROTRANSMITTER_RECEPTOR_COMPLEX	-0.0780121	0.116092	CC379	Negative	ATOH8	GO_RNA_POLYMERASE_III_ACTIVITY	0.0168137	0.735224	MF843	Positive
CRTAC1	GO_LAMELLAR_BODY	-0.176407	0.000348874	CC302	Negative	ATOH8	GO_INORGANIC_ANION_EXCHANGER_ACTIVITY	-0.0157233	0.751812	MF408	Negative
CRTAC1	GO_CORTICAL_ACTIN_CYTOSKELETON	-0.120537	0.0149685	CC135	Negative	ATOH8	GO_PRE_MRNA_BINDING	-0.0154905	0.75537	MF733	Negative
CRTAC1	GO_LATERAL_PLASMA_MEMBRANE	-0.0941724	0.0576652	CC310	Negative	ATOH8	GO_ODORANT_BINDING	0.0154374	0.756181	MF599	Positive
CRTAC1	GO_EUKARYOTIC_TRANSLATION_INITIATION_FACTOR_4F_COMPLEX	-0.0226183	0.649136	CC204	Negative	ATOH8	GO_C4_DICARBOXYLATE_TRANSMEMBRANE_TRANSPORTER_ACTIVITY	-0.0148699	0.764876	MF113	Negative
CRTAC1	GO_SPLICEOSOMAL_TRI_SNRNP_COMPLEX	-0.0742907	0.134597	CC569	Negative	ATOH8	GO_DYSTROGLYCAN_BINDING	-0.0145157	0.770319	MF263	Negative
CRTAC1	GO_METHYLTRANSFERASE_COMPLEX	0.0369793	0.456883	CC329	Positive	ATOH8	GO_ATP_DEPENDENT_MICROTUBULE_MOTOR_ACTIVITY_MINUS_END_DIRECTED	0.014242	0.774531	MF84	Positive
CRTAC1	GO_CHROMATOID_BODY	-0.282558	6.57e-09	CC85	Negative	ATOH8	GO_ORGANIC_ACID_TRANSMEMBRANE_TRANSPORTER_ACTIVITY	-0.0139211	0.779479	MF608	Negative
CRTAC1	GO_TRANSCRIPTIONAL_REPRESSOR_COMPLEX	-0.0162856	0.743244	CC603	Negative	ATOH8	GO_PROTEIN_ARGININE_N_METHYLTRANSFERASE_ACTIVITY	0.0131834	0.790888	MF744	Positive
CRTAC1	GO_RNA_POLYMERASE_III_COMPLEX	0.0235037	0.636373	CC518	Positive	ATOH8	GO_PRIMARY_ACTIVE_TRANSMEMBRANE_TRANSPORTER_ACTIVITY	0.013116	0.791931	MF736	Positive
CRTAC1	GO_AXONAL_GROWTH_CONE	-0.127019	0.010317	CC39	Negative	ATOH8	GO_TAU_PROTEIN_KINASE_ACTIVITY	0.0129879	0.793918	MF930	Positive
CRTAC1	GO_INTEGRATOR_COMPLEX	-0.0667563	0.178911	CC272	Negative	ATOH8	GO_ALDEHYDE_DEHYDROGENASE_NAD_P_PLUS_ACTIVITY	0.0122022	0.806129	MF46	Positive
CRTAC1	GO_KINESIN_COMPLEX	-0.366233	2.31e-14	CC299	Negative	ATOH8	GO_SUGAR_TRANSMEMBRANE_TRANSPORTER_ACTIVITY	-0.0116573	0.814626	MF913	Negative
CRTAC1	GO_INTRACILIARY_TRANSPORT_PARTICLE	0.174601	0.000401897	CC277	Positive	ATOH8	GO_NUCLEOSOMAL_DNA_BINDING	0.010842	0.827381	MF589	Positive
CRTAC1	GO_AGGRESOME	-0.220781	6.92e-06	CC15	Negative	ATOH8	GO_HISTONE_LYSINE_N_METHYLTRANSFERASE_ACTIVITY	0.00880221	0.859481	MF379	Positive
CRTAC1	GO_PROTEIN_ACETYLTRANSFERASE_COMPLEX	0.0338879	0.495393	CC482	Positive	ATOH8	GO_CHLORIDE_TRANSMEMBRANE_TRANSPORTER_ACTIVITY	0.00821493	0.868768	MF178	Positive
CRTAC1	GO_GABA_ERGIC_SYNAPSE	-0.120515	0.014987	CC229	Negative	ATOH8	GO_TRANSMEMBRANE_RECEPTOR_PROTEIN_SERINE_THREONINE_KINASE_ACTIVITY	0.00756766	0.879026	MF974	Positive
CRTAC1	GO_MEMBRANE_COAT	-0.216906	1.01e-05	CC326	Negative	ATOH8	GO_RETINOID_X_RECEPTOR_BINDING	-0.00727032	0.883745	MF813	Negative
CRTAC1	GO_DNA_POLYMERASE_COMPLEX	-0.344432	8.86e-13	CC168	Negative	ATOH8	GO_RNA_POLYMERASE_BINDING	0.00707427	0.886858	MF830	Positive
CRTAC1	GO_HOST_CELL_PART	-0.206231	2.75e-05	CC259	Negative	ATOH8	GO_SNRNA_BINDING	-0.00703392	0.887499	MF877	Negative
CRTAC1	GO_VACUOLAR_LUMEN	-0.361766	4.97e-14	CC622	Negative	ATOH8	GO_ACTININ_BINDING	0.00679243	0.891337	MF28	Positive
CRTAC1	GO_MITOTIC_SPINDLE_POLE	-0.310899	1.43e-10	CC353	Negative	ATOH8	GO_RIBOSOMAL_SMALL_SUBUNIT_BINDING	0.00674761	0.89205	MF822	Positive
CRTAC1	GO_PRP19_COMPLEX	-0.0354779	0.475374	CC494	Negative	ATOH8	GO_ELECTRON_TRANSFER_ACTIVITY	0.00648638	0.896205	MF266	Positive
CRTAC1	GO_LEADING_EDGE_MEMBRANE	-0.19134	0.000102662	CC311	Negative	ATOH8	GO_NF_KAPPAB_BINDING	0.00591574	0.905292	MF570	Positive
CRTAC1	GO_CYTOPLASMIC_REGION	-0.159341	0.00125826	CC148	Negative	ATOH8	GO_ALPHA_ACTININ_BINDING	-0.00571502	0.908491	MF51	Negative
CRTAC1	GO_ESC_E_Z_COMPLEX	-0.152199	0.00207688	CC197	Negative	ATOH8	GO_RIBONUCLEASE_P_ACTIVITY	-0.00537752	0.913873	MF819	Negative
CRTAC1	GO_PROTEIN_DNA_COMPLEX	-0.283859	5.56e-09	CC484	Negative	ATOH8	GO_ENDODEOXYRIBONUCLEASE_ACTIVITY	-0.00534551	0.914384	MF267	Negative
CRTAC1	GO_RNA_POLYMERASE_II_HOLOENZYME	0.035547	0.474513	CC516	Positive	ATOH8	GO_CYSTEINE_TYPE_ENDOPEPTIDASE_ACTIVATOR_ACTIVITY_INVOLVED_IN_APOPTOTIC_PROCESS	0.00431653	0.930818	MF208	Positive
CRTAC1	GO_BOX_H_ACA_RNP_COMPLEX	0.11376	0.0217092	CC53	Positive	ATOH8	GO_TRNA_METHYLTRANSFERASE_ACTIVITY	-0.00421881	0.932381	MF982	Negative
CRTAC1	GO_TRANSPORT_VESICLE	-0.213384	1.41e-05	CC607	Negative	ATOH8	GO_1_PHOSPHATIDYLINOSITOL_BINDING	-0.00416293	0.933274	MF3	Negative
CRTAC1	GO_RUFFLE	-0.25492	1.85e-07	CC523	Negative	ATOH8	GO_N_ACYLTRANSFERASE_ACTIVITY	-0.00403116	0.935382	MF546	Negative
CRTAC1	GO_DENDRITIC_SPINE_MEMBRANE	-0.112431	0.0233034	CC161	Negative	ATOH8	GO_RECEPTOR_INHIBITOR_ACTIVITY	0.00316884	0.949183	MF804	Positive
CRTAC1	GO_POLE_PLASM	-0.205506	2.94e-05	CC451	Negative	ATOH8	GO_ARF_GUANYL_NUCLEOTIDE_EXCHANGE_FACTOR_ACTIVITY	0.00311107	0.950108	MF78	Positive
CRTAC1	GO_LUMENAL_SIDE_OF_MEMBRANE	-0.295813	1.16e-09	CC315	Negative	ATOH8	GO_ANION_TRANSMEMBRANE_TRANSPORTER_ACTIVITY	-0.00298133	0.952187	MF70	Negative
CRTAC1	GO_RIBONUCLEOPROTEIN_GRANULE	-0.0288558	0.561595	CC509	Negative	ATOH8	GO_OUTWARD_RECTIFIER_POTASSIUM_CHANNEL_ACTIVITY	-0.0027694	0.955582	MF613	Negative
CRTAC1	GO_BASAL_PART_OF_CELL	-0.0831916	0.0937239	CC44	Negative	ATOH8	GO_CYSTEINE_TYPE_ENDOPEPTIDASE_ACTIVITY_INVOLVED_IN_APOPTOTIC_PROCESS	-0.00251493	0.95966	MF210	Negative
CRTAC1	GO_MICROVILLUS	-0.290019	2.5e-09	CC341	Negative	ATOH8	GO_CGMP_BINDING	0.00204362	0.967215	MF166	Positive
CRTAC1	GO_PROTEASOME_ACCESSORY_COMPLEX	-0.382322	1.33e-15	CC478	Negative	ATOH8	GO_HISTONE_DEMETHYLASE_ACTIVITY	-0.001901	0.969502	MF376	Negative
CRTAC1	GO_CYTOPLASMIC_SIDE_OF_ENDOPLASMIC_RETICULUM_MEMBRANE	0.215093	1.2e-05	CC149	Positive	ATOH8	GO_BASAL_TRANSCRIPTION_MACHINERY_BINDING	-0.00186899	0.970015	MF96	Negative
CRTAC1	GO_BRUSH_BORDER_MEMBRANE	-0.143316	0.00376308	CC55	Negative	ATOH8	GO_TRANSCRIPTION_COREPRESSOR_ACTIVITY	-0.000763743	0.987745	MF946	Negative
CRTAC1	GO_ACTIN_BASED_CELL_PROJECTION	-0.286045	4.2e-09	CC8	Negative	ATOH8	GO_BILE_ACID_TRANSMEMBRANE_TRANSPORTER_ACTIVITY	0.000215577	0.996541	MF105	Positive
CRTAC1	GO_PLATELET_ALPHA_GRANULE	-0.307895	2.19e-10	CC443	Negative	ATOH8	GO_PEPTIDE_N_ACETYLTRANSFERASE_ACTIVITY	0.000114781	0.998158	MF659	Positive
CYP1B1	GO_PROTEIN_DNA_COMPLEX	0.0531884	0.284398	CC484	Positive	CRTAC1	GO_MICROFILAMENT_MOTOR_ACTIVITY	-0.446695	<2E-16	MF512	Negative
CYP1B1	GO_ATPASE_DEPENDENT_TRANSMEMBRANE_TRANSPORT_COMPLEX	0.0609599	0.219755	CC33	Positive	CRTAC1	GO_LIPOPOLYSACCHARIDE_BINDING	-0.4391	<2E-16	MF466	Negative
CYP1B1	GO_TERTIARY_GRANULE	0.328006	1.16e-11	CC585	Positive	ATOH8	GO_PROTEIN_BINDING_INVOLVED_IN_HETEROTYPIC_CELL_CELL_ADHESION	-0.423619	<2E-16	MF745	Negative
CYP1B1	GO_DENDRITE_TERMINUS	0.115951	0.0192874	CC158	Positive	CRTAC1	GO_PHOSPHOLIPASE_INHIBITOR_ACTIVITY	-0.416057	<2E-16	MF704	Negative
CYP1B1	GO_RECEPTOR_COMPLEX	0.407413	<2E-16	CC496	Positive	ATOH8	GO_G_PROTEIN_BETA_SUBUNIT_BINDING	-0.414508	<2E-16	MF317	Negative
CYP1B1	GO_NUCLEAR_MEMBRANE	0.0915287	0.0650787	CC394	Positive	CRTAC1	GO_LIPASE_INHIBITOR_ACTIVITY	-0.410573	<2E-16	MF462	Negative
CYP1B1	GO_A_BAND	0.264237	6.27e-08	CC4	Positive	CRTAC1	GO_G_PROTEIN_ALPHA_SUBUNIT_BINDING	-0.401938	<2E-16	MF315	Negative
CYP1B1	GO_KINETOCHORE	-0.0610504	0.219071	CC300	Negative	CRTAC1	GO_AMIDE_BINDING	-0.401903	<2E-16	MF54	Negative
CYP1B1	GO_CULLIN_RING_UBIQUITIN_LIGASE_COMPLEX	-0.169959	0.000574597	CC142	Negative	CRTAC1	GO_PROTEASE_BINDING	-0.395812	<2E-16	MF741	Negative
CYP1B1	GO_SCHAFFER_COLLATERAL_CA1_SYNAPSE	0.303488	4.06e-10	CC531	Positive	ATOH8	GO_EXOGENOUS_PROTEIN_BINDING	-0.395776	<2E-16	MF286	Negative
CYP1B1	GO_AMPA_GLUTAMATE_RECEPTOR_COMPLEX	0.242623	7.27e-07	CC16	Positive	CRTAC1	GO_COMPLEMENT_BINDING	-0.395702	<2E-16	MF191	Negative
CYP1B1	GO_CELL_BODY_MEMBRANE	0.334533	4.24e-12	CC69	Positive	ATOH8	GO_AROMATASE_ACTIVITY	0.428516	<2E-16	MF80	Positive
CYP1B1	GO_MICROVILLUS_MEMBRANE	0.0757094	0.127291	CC342	Positive	CRTAC1	GO_CALMODULIN_BINDING	-0.390359	4.44e-16	MF129	Negative
CYP1B1	GO_AUTOPHAGOSOME_MEMBRANE	0.22484	4.63e-06	CC35	Positive	CRTAC1	GO_PROTEIN_LIPID_COMPLEX_BINDING	-0.389542	4.44e-16	MF759	Negative
CYP1B1	GO_STAGA_COMPLEX	-0.289579	2.65e-09	CC570	Negative	ATOH8	GO_SINGLE_STRANDED_DNA_HELICASE_ACTIVITY	-0.386717	4.44e-16	MF868	Negative
CYP1B1	GO_AXONEMAL_DYNEIN_COMPLEX	0.0335368	0.499873	CC40	Positive	CRTAC1	GO_MHC_CLASS_I_PROTEIN_BINDING	-0.386604	4.44e-16	MF508	Negative
CYP1B1	GO_POSTSYNAPTIC_MEMBRANE	0.354035	1.84e-13	CC461	Positive	ATOH8	GO_SPHINGOLIPID_BINDING	-0.384535	8.88e-16	MF893	Negative
CYP1B1	GO_POLE_PLASM	0.0504828	0.309645	CC451	Positive	CRTAC1	GO_CHAPERONE_BINDING	-0.382433	1.33e-15	MF169	Negative
CYP1B1	GO_INTEGRAL_COMPONENT_OF_SYNAPTIC_VESICLE_MEMBRANE	0.19219	9.55e-05	CC271	Positive	CRTAC1	GO_L_AMINO_ACID_TRANSMEMBRANE_TRANSPORTER_ACTIVITY	-0.379868	2e-15	MF444	Negative
CYP1B1	GO_PML_BODY	-0.0243345	0.624493	CC449	Negative	CRTAC1	GO_CHEMOKINE_ACTIVITY	-0.379109	2.22e-15	MF171	Negative
CYP1B1	GO_PLATELET_ALPHA_GRANULE_MEMBRANE	0.32202	2.84e-11	CC445	Positive	ATOH8	GO_STRUCTURAL_CONSTITUENT_OF_SYNAPSE	-0.375019	4.88e-15	MF911	Negative
CYP1B1	GO_RIBOSOMAL_SUBUNIT	-0.201744	4.14e-05	CC510	Negative	CRTAC1	GO_LOW_DENSITY_LIPOPROTEIN_PARTICLE_BINDING	-0.374348	5.55e-15	MF472	Negative
CYP1B1	GO_PROTEASOME_REGULATORY_PARTICLE_BASE_SUBCOMPLEX	-0.0130773	0.792532	CC481	Negative	CRTAC1	GO_KINESIN_BINDING	-0.374257	5.55e-15	MF443	Negative
CYP1B1	GO_LATERAL_PLASMA_MEMBRANE	-0.0204954	0.680155	CC310	Negative	CRTAC1	GO_QUATERNARY_AMMONIUM_GROUP_BINDING	-0.371597	8.88e-15	MF789	Negative
CYP1B1	GO_CHAPERONE_COMPLEX	-0.0605042	0.223228	CC81	Negative	CRTAC1	GO_MODIFIED_AMINO_ACID_BINDING	-0.364785	2.98e-14	MF525	Negative
CYP1B1	GO_APICAL_JUNCTION_COMPLEX	0.0301799	0.543769	CC25	Positive	CRTAC1	GO_CARGO_RECEPTOR_ACTIVITY	-0.361728	5.02e-14	MF151	Negative
CYP1B1	GO_AZUROPHIL_GRANULE	0.305306	3.15e-10	CC41	Positive	ATOH8	GO_NUCLEOCYTOPLASMIC_CARRIER_ACTIVITY	-0.361489	5.22e-14	MF583	Negative
CYP1B1	GO_TETRASPANIN_ENRICHED_MICRODOMAIN	0.241531	8.18e-07	CC588	Positive	CRTAC1	GO_PROTEIN_HETERODIMERIZATION_ACTIVITY	-0.361404	5.28e-14	MF751	Negative
CYP1B1	GO_NBAF_COMPLEX	-0.0828435	0.0951104	CC372	Negative	CRTAC1	GO_CYSTEINE_TYPE_ENDOPEPTIDASE_INHIBITOR_ACTIVITY_INVOLVED_IN_APOPTOTIC_PROCESS	-0.361348	5.33e-14	MF213	Negative
CYP1B1	GO_SPECIFIC_GRANULE_LUMEN	0.2633	7.01e-08	CC558	Positive	CRTAC1	GO_PEPTIDASE_REGULATOR_ACTIVITY	-0.358552	8.62e-14	MF652	Negative
CYP1B1	GO_ENDOLYSOSOME	0.353654	1.96e-13	CC180	Positive	ATOH8	GO_VIRION_BINDING	-0.357782	9.81e-14	MF1007	Negative
CYP1B1	GO_EXCITATORY_SYNAPSE	0.371943	8.44e-15	CC205	Positive	ATOH8	GO_PEPTIDE_BINDING	-0.357033	1.11e-13	MF655	Negative
CYP1B1	GO_CILIARY_ROOTLET	0.00800388	0.872111	CC95	Positive	CRTAC1	GO_CCR_CHEMOKINE_RECEPTOR_BINDING	-0.352161	2.51e-13	MF162	Negative
CYP1B1	GO_MICROBODY_LUMEN	-0.0467103	0.347239	CC333	Negative	CRTAC1	GO_RAGE_RECEPTOR_BINDING	-0.351543	2.78e-13	MF799	Negative
CYP1B1	GO_SARCOPLASM	0.374662	5.33e-15	CC528	Positive	ATOH8	GO_PATTERN_RECOGNITION_RECEPTOR_ACTIVITY	-0.351245	2.92e-13	MF648	Negative
CYP1B1	GO_CHOLINERGIC_SYNAPSE	0.0571089	0.25034	CC84	Positive	CRTAC1	GO_PROTEOGLYCAN_BINDING	-0.350703	3.19e-13	MF780	Negative
CYP1B1	GO_ANCHORED_COMPONENT_OF_PLASMA_MEMBRANE	0.384758	8.88e-16	CC20	Positive	ATOH8	GO_PHOSPHATIDYLINOSITOL_3_KINASE_REGULATOR_ACTIVITY	-0.347734	5.19e-13	MF682	Negative
CYP1B1	GO_PRONUCLEUS	-0.126215	0.0108137	CC477	Negative	CRTAC1	GO_SNAP_RECEPTOR_ACTIVITY	-0.347155	5.7e-13	MF874	Negative
CYP1B1	GO_CONNEXIN_COMPLEX	-0.0681105	0.170236	CC125	Negative	CRTAC1	GO_CHANNEL_INHIBITOR_ACTIVITY	-0.346961	5.88e-13	MF167	Negative
CYP1B1	GO_POLYSOMAL_RIBOSOME	-0.150442	0.00234184	CC452	Negative	CRTAC1	GO_SCAVENGER_RECEPTOR_ACTIVITY	-0.345041	8.03e-13	MF851	Negative
CYP1B1	GO_LATE_ENDOSOME	0.244925	5.66e-07	CC307	Positive	CRTAC1	GO_CARBOHYDRATE_BINDING	-0.344983	8.11e-13	MF134	Negative
CYP1B1	GO_U2_TYPE_SPLICEOSOMAL_COMPLEX	-0.203989	3.38e-05	CC617	Negative	CRTAC1	GO_ACTIN_FILAMENT_BINDING	-0.344869	8.26e-13	MF26	Negative
CYP1B1	GO_PROTON_TRANSPORTING_TWO_SECTOR_ATPASE_COMPLEX_CATALYTIC_DOMAIN	0.028885	0.561199	CC490	Positive	CRTAC1	GO_ANNEALING_ACTIVITY	-0.344836	8.3e-13	MF72	Negative
CYP1B1	GO_ANAPHASE_PROMOTING_COMPLEX	-0.220573	7.07e-06	CC17	Negative	CRTAC1	GO_PROTEASOME_BINDING	-0.344044	9.43e-13	MF742	Negative
CYP1B1	GO_PHAGOCYTIC_VESICLE	0.3308	7.55e-12	CC428	Positive	ATOH8	GO_TRANSMEMBRANE_RECEPTOR_PROTEIN_SERINE_THREONINE_KINASE_BINDING	0.34373	9.92e-13	MF975	Positive
CYP1B1	GO_SODIUM_POTASSIUM_EXCHANGING_ATPASE_COMPLEX	0.130153	0.00856739	CC555	Positive	CRTAC1	GO_GDP_DISSOCIATION_INHIBITOR_ACTIVITY	-0.342834	1.15e-12	MF333	Negative
CYP1B1	GO_MEMBRANE_REGION	0.34065	1.62e-12	CC327	Positive	ATOH8	GO_NUCLEAR_IMPORT_SIGNAL_RECEPTOR_ACTIVITY	-0.339859	1.84e-12	MF576	Negative
CYP1B1	GO_DIHYDROLIPOYL_DEHYDROGENASE_COMPLEX	-0.150102	0.00239666	CC164	Negative	CRTAC1	GO_METALLOENDOPEPTIDASE_ACTIVITY	-0.339323	2e-12	MF502	Negative
CYP1B1	GO_TRANS_GOLGI_NETWORK_MEMBRANE	0.154541	0.00176615	CC594	Positive	CRTAC1	GO_GDP_BINDING	-0.339024	2.1e-12	MF332	Negative
CYP1B1	GO_DENDRITIC_SPINE_MEMBRANE	0.210463	1.86e-05	CC161	Positive	CRTAC1	GO_ACTIN_BINDING	-0.337747	2.57e-12	MF24	Negative
CYP1B1	GO_PROTEIN_LIPID_COMPLEX	0.266607	4.73e-08	CC486	Positive	CRTAC1	GO_GTPASE_ACTIVITY	-0.335553	3.62e-12	MF355	Negative
CYP1B1	GO_ENDORIBONUCLEASE_COMPLEX	-0.353559	1.99e-13	CC192	Negative	ATOH8	GO_1_PHOSPHATIDYLINOSITOL_3_KINASE_REGULATOR_ACTIVITY	-0.335041	3.92e-12	MF2	Negative
CYP1B1	GO_LAMELLAR_BODY	0.0536194	0.280507	CC302	Positive	CRTAC1	GO_INTEGRIN_BINDING	-0.33488	4.02e-12	MF417	Negative
CYP1B1	GO_CELL_CELL_CONTACT_ZONE	0.323407	2.31e-11	CC70	Positive	ATOH8	GO_CELL_ADHESION_MEDIATOR_ACTIVITY	-0.334821	4.06e-12	MF163	Negative
CYP1B1	GO_RUFFLE	0.242026	7.76e-07	CC523	Positive	CRTAC1	GO_DIVALENT_INORGANIC_CATION_TRANSMEMBRANE_TRANSPORTER_ACTIVITY	-0.334758	4.1e-12	MF239	Negative
CYP1B1	GO_ENDOPLASMIC_RETICULUM_GOLGI_INTERMEDIATE_COMPARTMENT_MEMBRANE	0.194783	7.64e-05	CC187	Positive	CRTAC1	GO_COLLAGEN_BINDING	-0.334443	4.3e-12	MF190	Negative
CYP1B1	GO_OUTER_MEMBRANE	0.0759337	0.126165	CC414	Positive	CRTAC1	GO_GLYCOLIPID_BINDING	-0.334259	4.43e-12	MF347	Negative
CYP1B1	GO_HOPS_COMPLEX	-0.137004	0.00563137	CC257	Negative	CRTAC1	GO_FOLIC_ACID_BINDING	-0.333402	5.06e-12	MF311	Negative
CYP1B1	GO_INTRINSIC_COMPONENT_OF_POSTSYNAPTIC_MEMBRANE	0.366776	2.09e-14	CC289	Positive	ATOH8	GO_PROTEIN_FOLDING_CHAPERONE	-0.330628	7.75e-12	MF750	Negative
CYP1B1	GO_COATED_VESICLE	0.329911	8.65e-12	CC112	Positive	ATOH8	GO_DYNEIN_COMPLEX_BINDING	-0.326767	1.4e-11	MF258	Negative
CYP1B1	GO_CELL_SUBSTRATE_JUNCTION	0.286721	3.85e-09	CC77	Positive	ATOH8	GO_STRUCTURAL_CONSTITUENT_OF_POSTSYNAPSE	-0.324234	2.04e-11	MF908	Negative
CYP1B1	GO_CONDENSED_NUCLEAR_CHROMOSOME_CENTROMERIC_REGION	-0.034011	0.493827	CC123	Negative	CRTAC1	GO_3_5_DNA_HELICASE_ACTIVITY	-0.323884	2.15e-11	MF9	Negative
CYP1B1	GO_RNA_POLYMERASE_II_HOLOENZYME	-0.272292	2.37e-08	CC516	Negative	CRTAC1	GO_CYTOKINE_BINDING	-0.322565	2.62e-11	MF218	Negative
CYP1B1	GO_MAST_CELL_GRANULE	0.316766	6.15e-11	CC321	Positive	ATOH8	GO_PHOSPHOLIPASE_A2_ACTIVITY_CONSUMING_1_2_DIPALMITOYLPHOSPHATIDYLCHOLINE	0.321341	3.14e-11	MF700	Positive
CYP1B1	GO_NUCLEAR_OUTER_MEMBRANE	0.277777	1.2e-08	CC395	Positive	CRTAC1	GO_IMMUNOGLOBULIN_BINDING	-0.320876	3.37e-11	MF405	Negative
CYP1B1	GO_CYTOPLASMIC_MICROTUBULE	-0.0206529	0.677836	CC147	Negative	CRTAC1	GO_CORECEPTOR_ACTIVITY	-0.320767	3.42e-11	MF195	Negative
CYP1B1	GO_SPLICEOSOMAL_TRI_SNRNP_COMPLEX	-0.143514	0.00371489	CC569	Negative	CRTAC1	GO_PEPTIDASE_ACTIVATOR_ACTIVITY	-0.318394	4.85e-11	MF650	Negative
CYP1B1	GO_APICAL_DENDRITE	0.226394	3.96e-06	CC24	Positive	CRTAC1	GO_PHOTORECEPTOR_ACTIVITY	-0.317242	5.74e-11	MF716	Negative
CYP1B1	GO_SYNAPTIC_MEMBRANE	0.341545	1.41e-12	CC577	Positive	ATOH8	GO_MOLECULAR_ADAPTOR_ACTIVITY	-0.31646	6.43e-11	MF527	Negative
CYP1B1	GO_CLATHRIN_VESICLE_COAT	0.137767	0.00536776	CC109	Positive	CRTAC1	GO_SH3_DOMAIN_BINDING	-0.315784	7.09e-11	MF861	Negative
CYP1B1	GO_ATPASE_COMPLEX	-0.226273	4.01e-06	CC32	Negative	CRTAC1	GO_CYTOSKELETAL_ADAPTOR_ACTIVITY	-0.313479	9.9e-11	MF221	Negative
CYP1B1	GO_RNAI_EFFECTOR_COMPLEX	-0.0817939	0.0993901	CC520	Negative	CRTAC1	GO_FIBRONECTIN_BINDING	-0.313409	1e-10	MF307	Negative
CYP1B1	GO_COHESIN_COMPLEX	-0.00875459	0.860233	CC114	Negative	CRTAC1	GO_LIPOPROTEIN_PARTICLE_RECEPTOR_ACTIVITY	-0.312409	1.15e-10	MF467	Negative
CYP1B1	GO_PERIKARYON	0.331781	6.49e-12	CC425	Positive	ATOH8	GO_INOSITOL_1_4_5_TRISPHOSPHATE_BINDING	-0.311589	1.3e-10	MF410	Negative
CYP1B1	GO_CATALYTIC_STEP_1_SPLICEOSOME	-0.0423702	0.393914	CC61	Negative	CRTAC1	GO_ENZYME_INHIBITOR_ACTIVITY	-0.311282	1.36e-10	MF277	Negative
CYP1B1	GO_DNA_PACKAGING_COMPLEX	0.0663344	0.18168	CC167	Positive	CRTAC1	GO_RECEPTOR_SERINE_THREONINE_KINASE_BINDING	0.310648	1.48e-10	MF805	Positive
CYP1B1	GO_FILOPODIUM	0.275746	1.55e-08	CC224	Positive	CRTAC1	GO_MHC_PROTEIN_COMPLEX_BINDING	-0.308428	2.03e-10	MF511	Negative
CYP1B1	GO_INO80_TYPE_COMPLEX	-0.341429	1.43e-12	CC269	Negative	ATOH8	GO_ENDOPEPTIDASE_REGULATOR_ACTIVITY	-0.307244	2.4e-10	MF274	Negative
CYP1B1	GO_L_TYPE_VOLTAGE_GATED_CALCIUM_CHANNEL_COMPLEX	0.20192	4.07e-05	CC301	Positive	CRTAC1	GO_EPIDERMAL_GROWTH_FACTOR_RECEPTOR_BINDING	-0.306822	2.55e-10	MF280	Negative
CYP1B1	GO_GEMINI_OF_COILED_BODIES	-0.137473	0.00546796	CC233	Negative	CRTAC1	GO_RNA_POLYMERASE_II_REPRESSING_TRANSCRIPTION_FACTOR_BINDING	0.306522	2.66e-10	MF840	Positive
CYP1B1	GO_CHAPERONIN_CONTAINING_T_COMPLEX	-0.0805024	0.104865	CC82	Negative	CRTAC1	GO_TRANSITION_METAL_ION_TRANSMEMBRANE_TRANSPORTER_ACTIVITY	-0.306385	2.71e-10	MF961	Negative
CYP1B1	GO_POTASSIUM_CHANNEL_COMPLEX	0.37976	2.22e-15	CC464	Positive	ATOH8	GO_PURINERGIC_RECEPTOR_ACTIVITY	-0.304579	3.49e-10	MF786	Negative
CYP1B1	GO_G_PROTEIN_BETA_GAMMA_SUBUNIT_COMPLEX	0.32375	2.2e-11	CC228	Positive	ATOH8	GO_DISORDERED_DOMAIN_SPECIFIC_BINDING	-0.304006	3.77e-10	MF237	Negative
CYP1B1	GO_INTERSTITIAL_MATRIX	0.340911	1.56e-12	CC276	Positive	ATOH8	GO_LYS63_SPECIFIC_DEUBIQUITINASE_ACTIVITY	-0.303913	3.82e-10	MF478	Negative
CYP1B1	GO_EUKARYOTIC_TRANSLATION_INITIATION_FACTOR_3_COMPLEX	-0.0765927	0.1229	CC203	Negative	CRTAC1	GO_PHOSPHATIDYLSERINE_BINDING	-0.303756	3.91e-10	MF698	Negative
CYP1B1	GO_IMMUNOGLOBULIN_COMPLEX	0.333725	4.81e-12	CC262	Positive	ATOH8	GO_NADPLUS_BINDING	0.302925	4.38e-10	MF555	Positive
CYP1B1	GO_PROTON_TRANSPORTING_V_TYPE_ATPASE_COMPLEX	0.0262566	0.597383	CC492	Positive	CRTAC1	GO_RRNA_BINDING	0.302899	4.4e-10	MF846	Positive
CYP1B1	GO_PHOTORECEPTOR_DISC_MEMBRANE	0.120705	0.0148279	CC435	Positive	CRTAC1	GO_AMINO_ACID_TRANSMEMBRANE_TRANSPORTER_ACTIVITY	-0.302245	4.82e-10	MF60	Negative
CYP1B1	GO_H4_H2A_HISTONE_ACETYLTRANSFERASE_COMPLEX	-0.169011	0.000617435	CC247	Negative	CRTAC1	GO_RAN_GTPASE_BINDING	-0.301868	5.07e-10	MF801	Negative
CYP1B1	GO_U2_TYPE_CATALYTIC_STEP_2_SPLICEOSOME	-0.20911	2.11e-05	CC616	Negative	CRTAC1	GO_ANION_CATION_SYMPORTER_ACTIVITY	-0.301808	5.11e-10	MF67	Negative
CYP1B1	GO_TRANSCRIPTIONALLY_ACTIVE_CHROMATIN	-0.0468756	0.345533	CC604	Negative	CRTAC1	GO_PEPTIDE_ANTIGEN_BINDING	-0.301477	5.35e-10	MF654	Negative
CYP1B1	GO_PSEUDOPODIUM	0.300498	6.12e-10	CC495	Positive	ATOH8	GO_PEPTIDE_TRANSMEMBRANE_TRANSPORTER_ACTIVITY	-0.300414	6.19e-10	MF661	Negative
CYP1B1	GO_TRANSCRIPTION_ELONGATION_FACTOR_COMPLEX	-0.148755	0.00262505	CC597	Negative	CRTAC1	GO_PROTEIN_SERINE_THREONINE_KINASE_ACTIVATOR_ACTIVITY	-0.299622	6.9e-10	MF769	Negative
CYP1B1	GO_MYELIN_SHEATH	0.28496	4.83e-09	CC364	Positive	ATOH8	GO_IMMUNE_RECEPTOR_ACTIVITY	-0.299029	7.48e-10	MF404	Negative
CYP1B1	GO_TRANS_GOLGI_NETWORK_TRANSPORT_VESICLE	0.149967	0.00241868	CC595	Positive	CRTAC1	GO_GLYCOSAMINOGLYCAN_BINDING	-0.298754	7.77e-10	MF348	Negative
CYP1B1	GO_MALE_GERM_CELL_NUCLEUS	0.100952	0.0417942	CC319	Positive	CRTAC1	GO_THREONINE_TYPE_PEPTIDASE_ACTIVITY	-0.298739	7.78e-10	MF938	Negative
CYP1B1	GO_MHC_CLASS_II_PROTEIN_COMPLEX	0.34344	1.04e-12	CC330	Positive	ATOH8	GO_BH_DOMAIN_BINDING	-0.298119	8.47e-10	MF101	Negative
CYP1B1	GO_INTEGRAL_COMPONENT_OF_PRESYNAPTIC_ACTIVE_ZONE_MEMBRANE	0.267705	4.15e-08	CC270	Positive	CRTAC1	GO_HEAT_SHOCK_PROTEIN_BINDING	-0.297297	9.47e-10	MF362	Negative
[truncated: 13,408 more rows]

## Sheet: Table S3
Table S3. DEGs and overlapping genes in cluster1/2 and high-/low-risk cohorts.
Cluster1-related differential expressed genes.			High-risk-cohort-related differential expressed genes.			Overlapping differential expressed genes.
ID	logFC	adj.P.Val	ID	logFC	adj.P.Val	ID	logFC(High-risk-cohort)	Pvalue(High-risk-cohort)	logFC(cluster1)	P-value(cluster1)
ATOH8	-1.7431	5.14e-52	LOX	1.09802	5.04e-18	SPINK1	-3.38263	3.81e-16	-3.98002	3.19e-20
AC012307.2	-1.60866	9.56e-43	CRTAC1	-1.89709	5.9e-18	PSCA	-2.60967	2.54e-11	-3.21235	4.23e-15
CRTAC1	-2.78722	1.41e-38	LGALS4	-1.65605	7.02e-18	HMGCS2	-2.4197	8.88e-13	-3.53519	7.01e-25
SMAD6	-1.11719	1.86e-37	CLIC4	1.12267	1.75e-17	DHRS2	-2.37593	9.06e-12	-3.45475	2.43e-22
CLIC4	1.57291	1.8e-32	FBN1	1.07039	1.75e-17	VSIG2	-2.08862	2.62e-13	-2.94858	3.89e-24
DUSP2	-1.95397	4.2e-32	CHST11	1.10935	3.12e-17	UPK1A	-2.07056	2.45e-08	-2.6636	6.52e-12
ST3GAL5	-1.67584	2.61e-31	TNFAIP6	1.0545	7.86e-17	GPX2	-2.03579	9.59e-10	-2.46556	1.66e-12
ID1	-2.11721	2.91e-31	INHBA	1.22879	1.18e-16	UPK2	-2.01959	1.61e-07	-2.64739	4.47e-11
BTBD16	-2.85203	3.34e-31	FN1	1.9476	1.33e-16	CRTAC1	-1.89709	5.9e-18	-2.78722	1.41e-38
CALU	1.05514	5.7e-30	POSTN	1.97034	1.98e-16	CYP4B1	-1.83394	1.36e-10	-2.53239	7.64e-18
CHST11	1.50583	1.12e-29	CD109	1.16898	2.99e-16	BTBD16	-1.8202	1.67e-13	-2.85203	3.34e-31
FER1L4	-2.50889	1.44e-29	SPINK1	-3.38263	3.81e-16	SNCG	-1.79206	1.43e-11	-2.07047	1.33e-13
NADSYN1	-1.03576	1.44e-29	COL1A1	1.76971	1.07e-15	FER1L4	-1.76791	1.21e-15	-2.50889	1.44e-29
MIR6784	-1.15114	2.71e-29	FER1L4	-1.76791	1.21e-15	FAM3B	-1.73361	5.63e-15	-2.10131	7.63e-20
TMC7	-1.21595	8.19e-28	FBP1	-1.61484	1.24e-15	UPK3A	-1.72944	1.26e-07	-2.19377	1.49e-10
NEK6	1.16993	2.01e-27	COL5A2	1.36231	2.41e-15	CTSE	-1.71934	5.76e-13	-2.39426	9.45e-23
RP11-116D17.3	-1.05166	2.2e-27	ADAMTS2	1.13392	2.56e-15	AGR2	-1.66192	2.78e-10	-2.06595	6.27e-14
GNB4	1.09197	7e-27	COL1A2	1.67234	3.13e-15	HPGD	-1.65999	1.66e-09	-2.44722	3.83e-18
FCGR3A	2.07972	1.85e-26	HSD17B2	-1.30265	3.37e-15	LGALS4	-1.65605	7.02e-18	-1.49391	4.44e-13
SSH3	-1.38067	2.26e-26	COL3A1	1.74937	3.37e-15	S100P	-1.62648	2.93e-08	-2.39154	2.06e-15
FN1	2.54629	4.35e-26	FAM3B	-1.73361	5.63e-15	SLC14A1	-1.6197	5.83e-12	-2.46699	3.27e-25
HSD17B2	-1.77435	5.93e-26	COL5A1	1.44801	8.8e-15	FBP1	-1.61484	1.24e-15	-2.01121	5.25e-22
MAGIX	-1.02654	1.1e-25	SULF1	1.40085	9.76e-15	SLC44A4	-1.59965	6.59e-12	-1.61229	1.01e-10
CTHRC1	2.13284	1.29e-25	CTHRC1	1.54957	9.76e-15	AC019117.1	-1.4938	9.62e-11	-2.17777	2.72e-20
SHH	-1.91375	1.51e-25	ID1	-1.4098	1.12e-14	PLA2G2F	-1.45719	4.26e-10	-2.1618	1.14e-19
CYP3A5	-1.61595	2.24e-25	COL6A3	1.37209	2.51e-14	RP11-363E7.4	-1.45494	3.59e-10	-2.09241	1.4e-18
ANXA5	1.2727	3.27e-25	SFRP2	2.30923	2.87e-14	TFF1	-1.45086	3.96e-08	-1.94712	1.32e-12
SLC14A1	-2.46699	3.27e-25	ANXA1	1.39653	2.87e-14	ID1	-1.4098	1.12e-14	-2.11721	2.91e-31
ID3	-1.42371	3.97e-25	ST3GAL5	-1.09231	4.25e-14	BCAS1	-1.40671	1.05e-12	-1.9953	3.85e-23
CYP4F12	-1.8145	4.07e-25	GATA3-AS1	-1.25191	5.62e-14	ANXA10	-1.38066	2.62e-07	-2.26452	8.22e-17
MTHFD2	1.0817	6.34e-25	PRRX1	1.00236	6.26e-14	C10orf99	-1.36812	1.84e-05	-2.51444	3.13e-15
HMGCS2	-3.53519	7.01e-25	PPFIBP2	-1.02214	8.93e-14	TESC	-1.36796	1e-10	-1.90845	1.8e-18
TBX3	-2.13293	7.38e-25	CRACR2B	-1.13376	9.61e-14	TRIM31	-1.33144	1.41e-09	-1.60988	3.18e-12
LINC00930	-1.61805	8.17e-25	VCAN	1.19328	1.43e-13	GDF15	-1.30458	1.91e-07	-1.91351	1.13e-13
POSTN	2.5221	1.14e-24	CYP4F12	-1.27292	1.61e-13	HSD17B2	-1.30265	3.37e-15	-1.77435	5.93e-26
NCF2	1.34505	1.18e-24	BTBD16	-1.8202	1.67e-13	TBX3	-1.29897	3.12e-10	-2.13293	7.38e-25
SLC16A1	1.85652	2.15e-24	DEGS2	-1.11397	1.67e-13	GGT6	-1.29865	1.86e-10	-1.81491	4.79e-18
VSIG2	-2.94858	3.89e-24	VSIG2	-2.08862	2.62e-13	SMIM22	-1.29457	6.59e-12	-1.44118	4.96e-13
FCGR2A	1.43847	3.89e-24	DSC2	1.14948	2.85e-13	CYP4F12	-1.27292	1.61e-13	-1.8145	4.07e-25
FAM174B	-1.81402	6.41e-24	COL12A1	1.17112	2.97e-13	KRT20	-1.25969	0.00137508	-1.89559	1.97e-06
TNC	2.02656	7.01e-24	FNDC1	1.0157	5.07e-13	BHMT	-1.25578	2.06e-07	-1.79559	6.23e-13
DEGS1	1.2384	7.01e-24	AHNAK2	1.09143	5.68e-13	GATA3-AS1	-1.25191	5.62e-14	-1.63064	1.8e-21
MMD	1.12677	9.47e-24	CTSE	-1.71934	5.76e-13	FOXA1	-1.23686	1.78e-10	-1.71492	8.81e-18
RP11-379F12.4	-1.24587	1.23e-23	TUBB6	1.22803	6.92e-13	FAM174B	-1.23579	2.89e-12	-1.81402	6.41e-24
PPM1N	-1.24715	1.61e-23	HMGCS2	-2.4197	8.88e-13	CYP4F22	-1.22781	6.27e-08	-2.03886	6.22e-19
BX470102.3	-1.57042	1.78e-23	COL6A1	1.29295	9.96e-13	SHH	-1.22631	1.43e-11	-1.91375	1.51e-25
SPHK1	1.55631	1.79e-23	BCAS1	-1.40671	1.05e-12	GATA3	-1.22297	5.76e-08	-1.86398	6.42e-16
PALLD	1.31286	3.76e-23	LINC00930	-1.10157	1.27e-12	PCP4L1	-1.22261	2.69e-07	-1.44954	7.58e-09
BCAS1	-1.9953	3.85e-23	ADAMTSL4	1.00878	1.59e-12	SNX31	-1.21857	5.97e-06	-1.95515	8.87e-13
FLNA	1.55872	8.07e-23	BX470102.3	-1.08903	1.81e-12	GOLT1A	-1.21262	8.48e-12	-1.49486	7.45e-16
PNMA1	1.08173	9.45e-23	GPRC5C	-1.09307	2.48e-12	FABP6	-1.21139	3.8e-10	-1.8774	1.09e-21
CTSE	-2.39426	9.45e-23	RP11-465B22.8	-1.04644	2.57e-12	RNF128	-1.18991	1.92e-08	-1.77917	2.44e-16
ID2	-1.33222	1.38e-22	MFAP5	1.03596	2.59e-12	FOXQ1	-1.1822	2.34e-07	-1.75644	7.78e-14
PLS3	1.00262	1.58e-22	FAM174B	-1.23579	2.89e-12	PPARG	-1.17831	2.16e-09	-1.61987	1.76e-15
PPFIBP2	-1.37192	1.7e-22	THBS1	1.11307	3.46e-12	PADI3	-1.17294	0.000148336	-1.8436	3.99e-09
ADAM19	1.37965	1.75e-22	FCGR3A	1.33972	5.13e-12	FMO9P	-1.17114	1.22e-07	-1.28618	4.92e-08
ACTN1	1.15835	2.07e-22	CYP3A5	-1.05963	5.26e-12	UCA1	-1.13996	0.000223755	-2.29345	4.22e-14
DHRS2	-3.45475	2.43e-22	SLC14A1	-1.6197	5.83e-12	CRACR2B	-1.13376	9.61e-14	-1.32094	1.18e-16
CHI3L1	2.17227	2.7e-22	SMIM22	-1.29457	6.59e-12	TBX2-AS1	-1.13354	1.11e-09	-1.53544	1.56e-15
RAB31	1.30923	2.72e-22	SLC44A4	-1.59965	6.59e-12	AQP3	-1.13197	5.05e-05	-1.80853	1.67e-10
FAP	1.13205	3.96e-22	OLFML2B	1.00687	7.15e-12	CAPS	-1.12487	2.83e-09	-1.62914	5.23e-17
GFPT2	1.31908	3.99e-22	CCDC80	1.06077	7.61e-12	CLCA4	-1.11978	1.02e-05	-1.97392	9.6e-15
FBP1	-2.01121	5.25e-22	GOLT1A	-1.21262	8.48e-12	RP11-510N19.5	-1.11831	1.55e-11	-1.46178	1.84e-17
RP3-416H24.1	-1.69637	5.46e-22	DHRS2	-2.37593	9.06e-12	DEGS2	-1.11397	1.67e-13	-1.37218	2.41e-18
SFRP2	3.00688	5.82e-22	THBS2	1.41534	9.93e-12	FAM3D	-1.1031	1.83e-07	-1.49442	1.01e-11
CTD-2331H12.7	-1.06073	7.5e-22	GREM1	1.01316	1.4e-11	LINC00930	-1.10157	1.27e-12	-1.61805	8.17e-25
FABP6	-1.8774	1.09e-21	SNCG	-1.79206	1.43e-11	HID1	-1.09458	6.92e-11	-1.37996	3.3e-15
C1QC	2.02899	1.71e-21	SHH	-1.22631	1.43e-11	GPRC5C	-1.09307	2.48e-12	-1.45897	1.22e-19
GATA3-AS1	-1.63064	1.8e-21	AEBP1	1.44792	1.53e-11	ST3GAL5	-1.09231	4.25e-14	-1.67584	2.61e-31
SULF1	1.77368	2.3e-21	RP11-510N19.5	-1.11831	1.55e-11	ARL14	-1.08922	6.6e-10	-1.49319	2.56e-16
MSN	1.48815	2.51e-21	MSN	1.03388	1.57e-11	BX470102.3	-1.08903	1.81e-12	-1.57042	1.78e-23
TNFAIP6	1.24322	4.11e-21	SPARC	1.01712	1.58e-11	TLE2	-1.08149	2.65e-11	-1.36167	8.73e-16
CD109	1.40063	4.14e-21	COL6A2	1.30943	1.6e-11	TMPRSS2	-1.0799	1.72e-06	-1.361	8.62e-09
ARL4C	1.19388	4.64e-21	FLNA	1.04763	1.68e-11	ELF3	-1.07769	2.26e-08	-1.37715	8.26e-12
TUBB6	1.6547	4.86e-21	LUM	1.37644	2.02e-11	SCNN1G	-1.06592	8.86e-07	-1.44821	1.23e-10
MFAP3L	-1.08905	4.86e-21	IGF2BP2	1.1477	2.06e-11	CYP3A5	-1.05963	5.26e-12	-1.61595	2.24e-25
SIRPA	1.26387	4.86e-21	PSCA	-2.60967	2.54e-11	ERN2	-1.05697	1.19e-10	-1.41947	6.32e-17
PLCD3	-1.35134	5.39e-21	TLE2	-1.08149	2.65e-11	RP11-465B22.8	-1.04644	2.57e-12	-1.34932	3.02e-18
LOX	1.22908	5.74e-21	SULF2	1.23038	3.03e-11	KLHDC7A	-1.0431	7.23e-09	-1.2845	1.14e-11
PTRF	1.51907	6.09e-21	COL10A1	1.22809	3.72e-11	TBX2	-1.04145	2.98e-07	-1.51061	5.45e-13
CYP4F29P	-1.2724	6.56e-21	SPHK1	1.01649	3.87e-11	SCNN1B	-1.04075	1.93e-05	-1.50278	1.95e-09
CHST15	1.14949	7.43e-21	TNC	1.31059	4.25e-11	CAPN5	-1.03599	2.79e-10	-1.26143	2.32e-13
GPX8	1.12146	8.05e-21	HID1	-1.09458	6.92e-11	AKR1C3	-1.0306	8.89e-06	-1.07427	1.62e-05
THEMIS2	1.09876	8.2e-21	CD163	1.09086	8.55e-11	SPTSSB	-1.02422	1.61e-05	-1.39381	1.47e-08
RP11-84A19.3	-1.16632	8.62e-21	DCN	1.21815	9.16e-11	AKR1C2	-1.02314	0.000127228	-1.49864	4.07e-08
OSMR	1.40091	1.04e-20	AC019117.1	-1.4938	9.62e-11	PPFIBP2	-1.02214	8.93e-14	-1.37192	1.7e-22
ARNTL2	1.0977	1.14e-20	TESC	-1.36796	1e-10	FXYD3	-1.01883	5.69e-07	-1.28671	1.63e-09
OVGP1	-1.01956	1.19e-20	ERN2	-1.05697	1.19e-10	TBX1	-1.01813	3.7e-08	-1.27784	4.29e-11
RP3-406A7.7	-1.16923	1.42e-20	DSP	1.2502	1.22e-10	PPP1R3C	-1.0157	3.85e-08	-1.26892	5.75e-11
IGF2BP2	1.63193	1.45e-20	CYP4B1	-1.83394	1.36e-10	CYP4F8	-1.00896	4.79e-06	-1.8059	3.2e-16
CALD1	1.37422	1.62e-20	COL11A1	1.04057	1.67e-10	CYP4F23P	-1.00596	2.43e-08	-1.52968	1.1e-16
BTG2	-1.42969	1.67e-20	FOXA1	-1.23686	1.78e-10	BAMBI	-1.00483	1.18e-05	-1.31425	3.77e-08
COL16A1	1.41002	1.73e-20	GGT6	-1.29865	1.86e-10	TOX3	-1.00377	4.71e-08	-1.45285	1.7e-14
FAM83D	1.07018	1.73e-20	TIMP2	1.08676	2.07e-10	TRNP1	-1.00215	1.77e-09	-1.06598	2e-09
AHNAK2	1.44376	2.05e-20	ISLR	1.38971	2.24e-10	PRRX1	1.00236	6.26e-14	1.25157	1.38e-19
CD14	1.72929	2.11e-20	AGR2	-1.66192	2.78e-10	ICAM1	1.00461	2.48e-09	1.49935	3.06e-18
FCER1G	1.66646	2.56e-20	CAPN5	-1.03599	2.79e-10	DPT	1.00467	1.83e-08	1.18545	3.15e-10
AC019117.1	-2.17777	2.72e-20	TBX3	-1.29897	3.12e-10	OLFML2B	1.00687	7.15e-12	1.27975	5.28e-17
C1S	1.81483	2.86e-20	RP11-363E7.4	-1.45494	3.59e-10	CPXM1	1.00763	1.7e-08	1.38513	7.48e-14
SPINK1	-3.98002	3.19e-20	FABP6	-1.21139	3.8e-10	CTA-384D8.31	1.01105	0.00120163	1.31313	4.75e-05
GLIPR2	1.18482	3.66e-20	PLA2G2F	-1.45719	4.26e-10	IGHV4-34	1.01171	4.99e-05	1.18323	6.93e-06
COL1A1	2.10771	3.71e-20	SLC16A1	1.12529	5.4e-10	GREM1	1.01316	1.4e-11	1.40323	8.41e-20
COL1A2	2.02281	3.78e-20	ARL14	-1.08922	6.6e-10	IGLV6-57	1.01471	9.23e-05	1.37406	2.99e-07
CLMP	1.27397	3.83e-20	GPX2	-2.03579	9.59e-10	IGLV1-51	1.01515	0.000196289	1.30994	3.76e-06
C1QB	2.04436	4.61e-20	TBX2-AS1	-1.13354	1.11e-09	FNDC1	1.0157	5.07e-13	1.13497	1.93e-14
CNN3	1.05687	5.36e-20	CHI3L1	1.34789	1.15e-09	SPHK1	1.01649	3.87e-11	1.55631	1.79e-23
SIGLEC15	-1.1339	7.3e-20	C1QC	1.27855	1.22e-09	SPARC	1.01712	1.58e-11	1.10135	6.52e-12
FAM3B	-2.10131	7.63e-20	CAV1	1.10366	1.23e-09	CCL21	1.01837	1.36e-05	1.43635	2.7e-09
GREM1	1.40323	8.41e-20	TRIM31	-1.33144	1.41e-09	IGHV3-15	1.02353	7.99e-05	1.35427	4.84e-07
SERPINB9	1.21491	9.12e-20	MMP9	1.34119	1.57e-09	IGHV1-69-2	1.02792	3.97e-05	1.3661	1.42e-07
ITGB2	1.45964	1.12e-19	HPGD	-1.65999	1.66e-09	FGFBP1	1.02853	0.000528142	1.38903	5.59e-06
ITGA5	1.34536	1.12e-19	TRNP1	-1.00215	1.77e-09	CD14	1.0288	2.84e-08	1.72929	2.11e-20
PLA2G2F	-2.1618	1.14e-19	SFRP4	1.47853	1.88e-09	MSN	1.03388	1.57e-11	1.48815	2.51e-21
SLITRK6	-1.98634	1.16e-19	PPARG	-1.17831	2.16e-09	MFAP5	1.03596	2.59e-12	1.089	4.8e-12
GPRC5C	-1.45897	1.22e-19	ICAM1	1.00461	2.48e-09	COL11A1	1.04057	1.67e-10	1.06483	1.02e-09
ADAMTS2	1.34987	1.37e-19	CAPS	-1.12487	2.83e-09	UCHL1	1.04642	2.22e-07	1.49978	6.26e-13
TEAD4	1.1261	1.37e-19	SERPINE1	1.15409	2.89e-09	IGHV3-33	1.0473	8.63e-06	1.29255	1.69e-07
CD163	1.55983	1.37e-19	CTSK	1.07136	2.95e-09	FLNA	1.04763	1.68e-11	1.55872	8.07e-23
PRRX1	1.25157	1.38e-19	CTGF	1.12961	3.58e-09	LYZ	1.05217	5.9e-06	1.62959	6.26e-12
COL5A2	1.6196	1.38e-19	EFEMP1	1.20882	4.54e-09	TGM2	1.05228	2.29e-07	1.55072	1.24e-13
SULF2	1.72139	1.42e-19	KLHDC7A	-1.0431	7.23e-09	TNFAIP6	1.0545	7.86e-17	1.24322	4.11e-21
COL6A2	1.80766	1.53e-19	C1S	1.11895	8.64e-09	CCDC80	1.06077	7.61e-12	1.42224	5.89e-19
THEM6	-1.21985	1.98e-19	MMP11	1.28842	8.64e-09	FBN1	1.07039	1.75e-17	1.13206	1.74e-17
TRAK1	-1.03617	2.92e-19	CXCL9	1.37138	9.73e-09	CTSK	1.07136	2.95e-09	1.39838	1.03e-13
COL5A1	1.74076	3.01e-19	C1QB	1.2575	1.13e-08	APOE	1.07348	1.98e-07	1.82792	1.55e-18
FAM20C	1.31795	3.68e-19	MT2A	1.29751	1.26e-08	IGHV4-59	1.08	3.09e-05	1.36775	4.4e-07
TUBB2A	1.26545	4.93e-19	HTRA3	1.13619	1.43e-08	TIMP2	1.08676	2.07e-10	1.54994	9.88e-19
CCDC80	1.42224	5.89e-19	CPXM1	1.00763	1.7e-08	NNMT	1.08917	3.61e-07	1.70859	5.1e-15
CYP4F22	-2.03886	6.22e-19	DPT	1.00467	1.83e-08	CD163	1.09086	8.55e-11	1.55983	1.37e-19
FPR3	1.32064	6.39e-19	RNF128	-1.18991	1.92e-08	AHNAK2	1.09143	5.68e-13	1.44376	2.05e-20
FAAH	-1.07572	6.92e-19	ELF3	-1.07769	2.26e-08	IGLV1-44	1.09437	0.000118453	1.35224	5.48e-06
COL3A1	2.05364	7.37e-19	CYP4F23P	-1.00596	2.43e-08	DSC3	1.09444	4.27e-05	1.09504	0.000149605
AEBP1	1.96312	7.47e-19	UPK1A	-2.07056	2.45e-08	CALML5	1.09558	0.00107795	1.40164	5.49e-05
ME1	1.13212	7.75e-19	CD14	1.0288	2.84e-08	LOX	1.09802	5.04e-18	1.22908	5.74e-21
C1R	1.49755	9.21e-19	S100P	-1.62648	2.93e-08	CAV1	1.10366	1.23e-09	1.51465	7.33e-16
AATBC	-1.36963	9.22e-19	DSG3	1.44977	3.37e-08	CHST11	1.10935	3.12e-17	1.50583	1.12e-29
TIMP2	1.54994	9.88e-19	TBX1	-1.01813	3.7e-08	THBS1	1.11307	3.46e-12	1.214	8.02e-13
ARSI	1.13977	9.99e-19	PPP1R3C	-1.0157	3.85e-08	C1QA	1.11506	4.59e-07	1.95218	1.51e-18
ST3GAL4	-1.28145	1.13e-18	TFF1	-1.45086	3.96e-08	TGFBI	1.11852	4.62e-08	1.7922	6.47e-18
PLIN5	-1.09573	1.26e-18	TGFBI	1.11852	4.62e-08	C1S	1.11895	8.64e-09	1.81483	2.86e-20
CDC25B	1.10863	1.28e-18	TOX3	-1.00377	4.71e-08	IGHV3-30	1.12174	1.31e-05	1.35985	5.06e-07
IPO5P1	-1.01308	1.3e-18	GATA3	-1.22297	5.76e-08	CLIC4	1.12267	1.75e-17	1.57291	1.8e-32
VIPR1	-1.11822	1.37e-18	CYP4F22	-1.22781	6.27e-08	SLC16A1	1.12529	5.4e-10	1.85652	2.15e-24
RP11-363E7.4	-2.09241	1.4e-18	CCL18	1.20786	7.17e-08	CTGF	1.12961	3.58e-09	1.08548	1.57e-07
C1QA	1.95218	1.51e-18	KRT6A	2.30154	1.11e-07	ADAMTS2	1.13392	2.56e-15	1.34987	1.37e-19
APOE	1.82792	1.55e-18	FMO9P	-1.17114	1.22e-07	HTRA3	1.13619	1.43e-08	1.75319	9.42e-18
EFEMP1	1.84772	1.55e-18	UPK3A	-1.72944	1.26e-07	IGKV3-15	1.13962	2.13e-05	1.45878	1.87e-07
COL6A3	1.64501	1.55e-18	UPK2	-2.01959	1.61e-07	SPP1	1.14511	1.96e-06	1.79849	2.38e-13
VSIG4	1.51337	1.6e-18	FAM3D	-1.1031	1.83e-07	IGF2BP2	1.1477	2.06e-11	1.63193	1.45e-20
PTPRR	-1.32116	1.73e-18	GDF15	-1.30458	1.91e-07	GJB2	1.14805	2.59e-06	1.28423	7.67e-07
S100A10	1.53338	1.73e-18	APOE	1.07348	1.98e-07	DSC2	1.14948	2.85e-13	1.3826	3.98e-17
CTSL	1.20515	1.73e-18	BHMT	-1.25578	2.06e-07	SERPINE1	1.15409	2.89e-09	1.10145	1.63e-07
TESC	-1.90845	1.8e-18	UCHL1	1.04642	2.22e-07	IGHG2	1.16122	0.000476065	1.64436	1.37e-06
SYTL1	-1.17287	1.93e-18	TGM2	1.05228	2.29e-07	IGLV2-14	1.16377	8.64e-05	1.61069	1.36e-07
CYBB	1.40589	2.34e-18	FOXQ1	-1.1822	2.34e-07	IGLC3	1.16539	0.000369437	1.62952	1.23e-06
C3AR1	1.20432	2.39e-18	IGHV3-21	1.30753	2.51e-07	CD109	1.16898	2.99e-16	1.40063	4.14e-21
DEGS2	-1.37218	2.41e-18	ANXA10	-1.38066	2.62e-07	COL12A1	1.17112	2.97e-13	1.37187	3.5e-16
RP11-465B22.8	-1.34932	3.02e-18	PCP4L1	-1.22261	2.69e-07	IGLC2	1.17397	0.000292897	1.75021	1.16e-07
ICAM1	1.49935	3.06e-18	TBX2	-1.04145	2.98e-07	IGHG4	1.1769	0.000529676	1.8126	1.37e-07
ALOX5AP	1.31544	3.14e-18	NNMT	1.08917	3.61e-07	IGLV2-23	1.18097	2.78e-05	1.41563	1.82e-06
SHROOM1	-1.12908	3.39e-18	CXCL10	1.3402	4.54e-07	IGLV2-11	1.18387	4.44e-06	1.30298	2.14e-06
CD53	1.44764	3.82e-18	C1QA	1.11506	4.59e-07	VCAN	1.19328	1.43e-13	1.28256	6.16e-14
HPGD	-2.44722	3.83e-18	FXYD3	-1.01883	5.69e-07	IGLV1-47	1.20776	4.39e-06	1.32623	2.25e-06
INHBA	1.35029	4.59e-18	KRT14	2.00149	8.18e-07	CCL18	1.20786	7.17e-08	1.82363	2.04e-15
SLAMF8	1.19821	4.71e-18	SCNN1G	-1.06592	8.86e-07	EFEMP1	1.20882	4.54e-09	1.84772	1.55e-18
GGT6	-1.81491	4.79e-18	KRT6B	1.5923	8.86e-07	DCN	1.21815	9.16e-11	1.43522	4.14e-13
TXNRD1	1.11238	6.24e-18	IGHV1-18	1.39252	9.2e-07	PI3	1.22	0.00410785	2.27394	4.45e-08
WISP1	1.06773	6.47e-18	COMP	1.22513	9.65e-07	IGHG3	1.22121	9.86e-05	1.78545	2.66e-08
TGFBI	1.7922	6.47e-18	TMPRSS2	-1.0799	1.72e-06	IGHV5-51	1.22163	2.05e-05	1.55909	1.93e-07
SPOCD1	-1.39347	6.53e-18	SPP1	1.14511	1.96e-06	COMP	1.22513	9.65e-07	1.39853	1.34e-07
FKBP5	1.07268	7.53e-18	GJB2	1.14805	2.59e-06	TUBB6	1.22803	6.92e-13	1.6547	4.86e-21
CYP4B1	-2.53239	7.64e-18	IGHV4-39	1.33014	3.27e-06	COL10A1	1.22809	3.72e-11	1.56755	5.24e-16
FOXA1	-1.71492	8.81e-18	IGLV1-47	1.20776	4.39e-06	INHBA	1.22879	1.18e-16	1.35029	4.59e-18
ANXA6	1.28505	8.84e-18	IGLV2-11	1.18387	4.44e-06	SULF2	1.23038	3.03e-11	1.72139	1.42e-19
HTRA3	1.75319	9.42e-18	S100A8	1.71916	4.47e-06	IGLV3-25	1.23209	3.77e-05	1.55174	6.82e-07
CERCAM	1.15896	1.01e-17	CYP4F8	-1.00896	4.79e-06	DSP	1.2502	1.22e-10	1.36047	4.37e-11
EMP3	1.36981	1.11e-17	IGLV1-40	1.33036	5.13e-06	C1QB	1.2575	1.13e-08	2.04436	4.61e-20
HAVCR2	1.00767	1.12e-17	IGHG1	1.59346	5.34e-06	IGKC	1.26727	0.000247397	1.89533	7.44e-08
ICA1	-1.05912	1.61e-17	IGKV3-20	1.46638	5.63e-06	IGKV3-11	1.27551	1.56e-05	1.70071	2.92e-08
ANXA1	1.63211	1.7e-17	IGKV1-5	1.38619	5.74e-06	C1QC	1.27855	1.22e-09	2.02899	1.71e-21
S100A5	-1.02101	1.74e-17	LYZ	1.05217	5.9e-06	MMP11	1.28842	8.64e-09	1.86206	6.36e-16
FBN1	1.13206	1.74e-17	SNX31	-1.21857	5.97e-06	KRT16	1.29276	0.000231408	1.48587	6.17e-05
ADAM12	1.06806	1.75e-17	IGHV3-23	1.33048	6.21e-06	COL6A1	1.29295	9.96e-13	1.5629	1.52e-16
MS4A4A	1.14773	1.8e-17	IGHV3-33	1.0473	8.63e-06	MT2A	1.29751	1.26e-08	1.9289	1.57e-16
RP11-510N19.5	-1.46178	1.84e-17	AKR1C3	-1.0306	8.89e-06	IGHV3-21	1.30753	2.51e-07	1.44074	9.73e-08
TYROBP	1.52857	1.87e-17	CLCA4	-1.11978	1.02e-05	COL6A2	1.30943	1.6e-11	1.80766	1.53e-19
TREM2	1.23134	2.14e-17	GSTA1	-1.10817	1.03e-05	TNC	1.31059	4.25e-11	2.02656	7.01e-24
KRTAP5-9	-1.07342	2.25e-17	BAMBI	-1.00483	1.18e-05	IGKV4-1	1.31285	1.66e-05	1.68109	1.28e-07
ISLR	1.90811	3.07e-17	IGHV3-30	1.12174	1.31e-05	IGHV4-39	1.33014	3.27e-06	1.70159	1.23e-08
SAMHD1	1.03221	3.17e-17	CCL21	1.01837	1.36e-05	IGLV1-40	1.33036	5.13e-06	1.68096	3.71e-08
EPHB6	-1.63108	3.19e-17	IGLV3-21	1.36473	1.5e-05	IGHV3-23	1.33048	6.21e-06	1.66592	6.72e-08
HCK	1.16547	3.35e-17	IGKV3-11	1.27551	1.56e-05	FCGR3A	1.33972	5.13e-12	2.07972	1.85e-26
DSC2	1.3826	3.98e-17	SPTSSB	-1.02422	1.61e-05	CXCL10	1.3402	4.54e-07	1.89732	4.69e-12
CTD-2396E7.11	-1.14788	4.03e-17	IGKV4-1	1.31285	1.66e-05	MMP9	1.34119	1.57e-09	1.79255	7.64e-15
GPR68	1.13971	4.62e-17	C10orf99	-1.36812	1.84e-05	CHI3L1	1.34789	1.15e-09	2.17227	2.7e-22
CAPS	-1.62914	5.23e-17	SCNN1B	-1.04075	1.93e-05	COL5A2	1.36231	2.41e-15	1.6196	1.38e-19
TGFB3	1.04811	5.28e-17	IGHV5-51	1.22163	2.05e-05	SPRR1B	1.36267	5.4e-05	1.59524	7.45e-06
OLFML2B	1.27975	5.28e-17	IGKV3-15	1.13962	2.13e-05	IGLV3-21	1.36473	1.5e-05	1.79303	4.6e-08
HOXB3	-1.04122	6.09e-17	IGLV2-23	1.18097	2.78e-05	CXCL9	1.37138	9.73e-09	1.78587	7.81e-13
ERN2	-1.41947	6.32e-17	IGHV4-59	1.08	3.09e-05	COL6A3	1.37209	2.51e-14	1.64501	1.55e-18
CTD-2008P7.9	-1.04275	6.79e-17	IGLV3-25	1.23209	3.77e-05	LUM	1.37644	2.02e-11	1.564	5.7e-13
TMC4	-1.37174	7.45e-17	IGHV1-69-2	1.02792	3.97e-05	IGKV1-5	1.38619	5.74e-06	1.73545	6e-08
ANXA10	-2.26452	8.22e-17	S100A9	1.41297	4e-05	ISLR	1.38971	2.24e-10	1.90811	3.07e-17
FAM129A	1.07549	8.56e-17	DSC3	1.09444	4.27e-05	IGHV1-18	1.39252	9.2e-07	1.70799	1e-08
CYP4F23P	-1.52968	1.1e-16	IGHV4-34	1.01171	4.99e-05	ANXA1	1.39653	2.87e-14	1.63211	1.7e-17
CRACR2B	-1.32094	1.18e-16	AQP3	-1.13197	5.05e-05	SULF1	1.40085	9.76e-15	1.77368	2.3e-21
PLAUR	1.14046	1.3e-16	SPRR1B	1.36267	5.4e-05	S100A9	1.41297	4e-05	1.75745	1.05e-06
MECOM	-1.14548	1.44e-16	IGHV3-15	1.02353	7.99e-05	THBS2	1.41534	9.93e-12	1.61781	1.64e-13
COL6A1	1.5629	1.52e-16	IGLV2-14	1.16377	8.64e-05	AEBP1	1.44792	1.53e-11	1.96312	7.47e-19
MT2A	1.9289	1.57e-16	IGLV6-57	1.01471	9.23e-05	COL5A1	1.44801	8.8e-15	1.74076	3.01e-19
TPM1	1.06561	1.61e-16	IGHG3	1.22121	9.86e-05	DSG3	1.44977	3.37e-08	1.70347	8.1e-10
CSF1R	1.27345	1.82e-16	IGLV1-44	1.09437	0.000118453	IGKV3-20	1.46638	5.63e-06	2.03833	1.05e-09
SPON2	1.19083	2.25e-16	AKR1C2	-1.02314	0.000127228	SFRP4	1.47853	1.88e-09	1.87878	2.73e-13
RP11-44F21.5	-1.12989	2.41e-16	PADI3	-1.17294	0.000148336	S100A7	1.51664	0.000159802	1.92159	4.44e-06
RNF128	-1.77917	2.44e-16	S100A7	1.51664	0.000159802	CTHRC1	1.54957	9.76e-15	2.13284	1.29e-25
HAPLN3	1.14864	2.56e-16	IGLV1-51	1.01515	0.000196289	KRT5	1.55097	0.000432878	1.83481	7.48e-05
ARL14	-1.49319	2.56e-16	UCA1	-1.13996	0.000223755	KRT6B	1.5923	8.86e-07	2.12703	2.72e-10
SPI1	1.24283	2.88e-16	KRT16	1.29276	0.000231408	IGHG1	1.59346	5.34e-06	2.36937	4.22e-11
CYBRD1	1.14375	2.96e-16	IGKC	1.26727	0.000247397	COL1A2	1.67234	3.13e-15	2.02281	3.78e-20
CYP4F8	-1.8059	3.2e-16	IGLC2	1.17397	0.000292897	S100A8	1.71916	4.47e-06	2.3641	1.12e-09
CTSH	-1.25845	3.22e-16	IGLC3	1.16539	0.000369437	COL3A1	1.74937	3.37e-15	2.05364	7.37e-19
COL12A1	1.37187	3.5e-16	KRT5	1.55097	0.000432878	COL1A1	1.76971	1.07e-15	2.10771	3.71e-20
C5AR1	1.02166	3.55e-16	IGHG2	1.16122	0.000476065	FN1	1.9476	1.33e-16	2.54629	4.35e-26
SLC44A3	-1.10411	3.78e-16	FGFBP1	1.02853	0.000528142	POSTN	1.97034	1.98e-16	2.5221	1.14e-24
AIF1	1.36028	4.25e-16	IGHG4	1.1769	0.000529676	KRT14	2.00149	8.18e-07	2.48753	5.15e-09
SEMA3F	-1.01102	5.16e-16	CALML3	1.11987	0.000542811	KRT6A	2.30154	1.11e-07	2.79141	9.51e-10
RBBP8NL	-1.16	5.2e-16	CALML5	1.09558	0.00107795	SFRP2	2.30923	2.87e-14	3.00688	5.82e-22
COL10A1	1.56755	5.24e-16	CTA-384D8.31	1.01105	0.00120163
CCL11	1.3408	5.33e-16	KRT20	-1.25969	0.00137508
LRIG1	1.00364	5.74e-16	PI3	1.22	0.00410785
GATA2	-1.33469	6.06e-16
GAS1	1.31349	6.12e-16
MS4A6A	1.09631	6.23e-16
MMP11	1.86206	6.36e-16
GATA3	-1.86398	6.42e-16
TYMP	1.53661	6.79e-16
CPVL	1.16858	7.27e-16
CAV1	1.51465	7.33e-16
GOLT1A	-1.49486	7.45e-16
FYB	1.15211	8.72e-16
TLE2	-1.36167	8.73e-16
ID4	-1.38444	1.04e-15
BCL2A1	1.132	1.17e-15
COL8A2	1.05434	1.21e-15
BCAT1	1.0936	1.3e-15
PHGR1	-1.43849	1.32e-15
RNASE6	1.19482	1.33e-15
FIBIN	1.15676	1.45e-15
PMEPA1	1.36855	1.48e-15
TBX2-AS1	-1.53544	1.56e-15
AC017060.1	-1.1465	1.72e-15
PPARG	-1.61987	1.76e-15
CCL18	1.82363	2.04e-15
S100P	-2.39154	2.06e-15
PLEK	1.14389	2.3e-15
C10orf99	-2.51444	3.13e-15
HID1	-1.37996	3.3e-15
MRC1	1.08757	3.37e-15
MT1X	1.52299	3.9e-15
ZBTB7C	-1.18336	3.98e-15
PSCA	-3.21235	4.23e-15
MIR429	-1.34346	4.37e-15
MAFB	1.11951	5.03e-15
NNMT	1.70859	5.1e-15
S100A6	-1.21843	5.52e-15
U47924.27	-1.22887	6.03e-15
MMP9	1.79255	7.64e-15
SRGN	1.42373	9.05e-15
CLCA4	-1.97392	9.6e-15
MAOA	-1.49807	1e-14
PTGS1	1.28106	1.28e-14
MCF2L-AS1	-1.08754	1.41e-14
RAPGEFL1	-1.34475	1.68e-14
TOX3	-1.45285	1.7e-14
PXDN	1.04145	1.76e-14
MFI2	1.13446	1.9e-14
FNDC1	1.13497	1.93e-14
COPZ2	1.02847	2.06e-14
COL15A1	1.10289	2.3e-14
RHPN1	-1.11415	2.36e-14
IL32	1.3699	3.25e-14
MSC	1.1889	3.37e-14
MFAP2	1.22101	3.42e-14
ERBB3	-1.11729	3.84e-14
UCA1	-2.29345	4.22e-14
LY96	1.05361	4.43e-14
SELPLG	1.0791	5e-14
TMEM176B	1.29972	5.26e-14
MPEG1	1.00312	5.47e-14
TSPAN8	-1.15084	5.54e-14
VCAN	1.28256	6.16e-14
AGR2	-2.06595	6.27e-14
SORL1	-1.10497	7.4e-14
CPXM1	1.38513	7.48e-14
FOXQ1	-1.75644	7.78e-14
F3	1.59615	8.2e-14
HOXB5	-1.03142	9.1e-14
SEMA6A	-1.0409	9.35e-14
WARS	1.26983	9.95e-14
CTSK	1.39838	1.03e-13
RGL3	-1.23992	1.1e-13
GDF15	-1.91351	1.13e-13
CAV2	1.00335	1.22e-13
TGM2	1.55072	1.24e-13
TSPAN12	-1.09227	1.25e-13
FMOD	1.18078	1.31e-13
PDGFRB	1.06246	1.31e-13
SNCG	-2.07047	1.33e-13
EPSTI1	1.11103	1.57e-13
AXL	1.12288	1.58e-13
THBS2	1.61781	1.64e-13
CAPN5	-1.26143	2.32e-13
SPP1	1.79849	2.38e-13
BHLHE41	-1.19052	2.38e-13
CCDC64B	-1.2216	2.62e-13
ECM1	1.08756	2.7e-13
SFRP4	1.87878	2.73e-13
AC019117.2	-1.25081	2.84e-13
SRPX	1.21587	3.03e-13
RAB15	-1.12853	3.65e-13
DCN	1.43522	4.14e-13
LGALS4	-1.49391	4.44e-13
CYP2J2	-1.22387	4.65e-13
PDLIM3	1.07726	4.73e-13
SMIM22	-1.44118	4.96e-13
STAT1	1.07874	4.96e-13
MIR3189	-1.43331	5.21e-13
TBX2	-1.51061	5.45e-13
LUM	1.564	5.7e-13
BHMT	-1.79559	6.23e-13
UCHL1	1.49978	6.26e-13
TM7SF2	-1.08342	6.61e-13
TNFAIP2	-1.23452	7.11e-13
CXCL9	1.78587	7.81e-13
THBS1	1.214	8.02e-13
DPYSL3	1.26661	8.46e-13
SNX31	-1.95515	8.87e-13
MSX2	-1.26951	9.92e-13
WNT7B	-1.06702	1.02e-12
EMILIN1	1.33563	1.07e-12
HLA-DRA	1.56932	1.15e-12
SNORD123	-1.03618	1.25e-12
TMEM184A	-1.01623	1.26e-12
TFF1	-1.94712	1.32e-12
GBP1	1.22316	1.32e-12
LGALS1	1.19348	1.32e-12
TNFRSF18	1.00077	1.39e-12
METTL7A	-1.2887	1.49e-12
ENTPD3	-1.23536	1.63e-12
MT-ND6	-1.1411	1.64e-12
GPX2	-2.46556	1.66e-12
PDPN	1.20523	1.75e-12
RP4-568C11.4	-1.18897	1.97e-12
VIM	1.116	2.28e-12
LCP1	1.21519	2.41e-12
TRIM31	-1.60988	3.18e-12
HLA-DMB	1.03066	3.34e-12
CTSV	1.05064	3.59e-12
LYPD6B	-1.03825	3.63e-12
CCL4	1.00017	3.99e-12
CXCL10	1.89732	4.69e-12
MFAP5	1.089	4.8e-12
RP1-170O19.17	-1.09983	5.42e-12
FLNC	1.19917	6.18e-12
LYZ	1.62959	6.26e-12
SPARC	1.10135	6.52e-12
UPK1A	-2.6636	6.52e-12
HLA-DPB1	1.33908	7.1e-12
BGN	1.26825	7.6e-12
DHCR24	1.11374	7.69e-12
LRRC15	1.06782	7.92e-12
RCN3	1.16207	8.12e-12
ELF3	-1.37715	8.26e-12
CTD-2026G6.3	-1.02058	8.28e-12
FAM3D	-1.49442	1.01e-11
TMEM176A	1.02551	1.03e-11
KLHDC7A	-1.2845	1.14e-11
RGS2	1.09445	1.17e-11
OLFML3	1.17064	1.23e-11
HLA-DQA1	1.29451	1.27e-11
CAPN8	-1.17772	1.27e-11
MT1G	1.10508	1.45e-11
ASPN	1.20956	1.49e-11
IFITM3	1.15793	1.89e-11
SERPING1	1.25174	2.16e-11
EPN3	-1.0029	2.25e-11
FKBP10	1.19853	2.99e-11
MT-ND5	-1.02896	3.3e-11
RGS1	1.11938	3.71e-11
FSTL3	1.12589	3.89e-11
ABCC3	-1.08399	4.06e-11
IGHG1	2.36937	4.22e-11
TBX1	-1.27784	4.29e-11
DSP	1.36047	4.37e-11
UPK2	-2.64739	4.47e-11
HES2	1.25568	4.61e-11
ERICH5	-1.01462	5.07e-11
PLAU	1.2328	5.17e-11
PPP1R3C	-1.26892	5.75e-11
PTK6	-1.15294	6.11e-11
MT1L	1.13044	6.46e-11
PRF1	1.01202	7.35e-11
LAPTM5	1.13518	7.37e-11
KCNJ15	-1.01081	7.44e-11
HLA-DPA1	1.31729	7.46e-11
ANXA3	1.07574	7.49e-11
GAS6	1.0485	7.92e-11
CCL5	1.47519	8.05e-11
ALOX5	-1.06811	8.7e-11
EGFR	1.03867	8.74e-11
CYP1B1	1.00023	9.91e-11
ALDH1L1	-1.01865	9.97e-11
SLC44A4	-1.61229	1.01e-10
RP11-66N24.6	-1.02387	1.17e-10
TMEM45A	1.28935	1.18e-10
MYADM	1.06216	1.2e-10
SCNN1G	-1.44821	1.23e-10
TUBA1A	1.03017	1.37e-10
AZGP1	-1.02943	1.46e-10
UPK3A	-2.19377	1.49e-10
CCL2	1.07603	1.52e-10
AQP3	-1.80853	1.67e-10
HLA-DRB1	1.40179	1.9e-10
RAMP1	1.24784	1.96e-10
CASQ1	-1.09146	1.97e-10
SERPINF1	1.18078	1.98e-10
RHBG	-1.049	2.19e-10
TAGLN	1.38367	2.31e-10
FOLR2	1.0444	2.31e-10
CHRDL2	1.09865	2.49e-10
PMP22	1.02246	2.49e-10
KRT6B	2.12703	2.72e-10
HLA-DRB6	1.24582	2.84e-10
RP11-616M22.7	-1.05652	3.09e-10
DPT	1.18545	3.15e-10
FCRLB	-1.11075	3.23e-10
C12orf75	1.00217	3.39e-10
MARCO	1.02209	3.45e-10
AL132988.1	-1.00094	3.54e-10
GZMB	1.20086	3.64e-10
CD44	1.13289	4.25e-10
TAP1	1.04285	4.52e-10
BMP7	-1.16565	4.62e-10
TRAC	1.05583	5.21e-10
D4S234E	-1.10855	5.51e-10
FAM84A	-1.18527	5.58e-10
GBP5	1.10416	5.66e-10
SECTM1	1.1469	5.75e-10
CDC42EP5	-1.11306	7.33e-10
NKG7	1.13819	7.74e-10
EVPL	-1.02113	7.86e-10
DSG3	1.70347	8.1e-10
KRT7	-1.92647	8.32e-10
KRT6A	2.79141	9.51e-10
COL11A1	1.06483	1.02e-09
IGKV3-20	2.03833	1.05e-09
RHOD	1.00225	1.06e-09
S100A8	2.3641	1.12e-09
LINC00162	1.12485	1.12e-09
SERPINA1	1.31649	1.2e-09
MYCL	-1.25146	1.29e-09
BNC1	1.01304	1.33e-09
HLA-DQB1	1.20616	1.4e-09
MXRA8	1.02722	1.55e-09
BMP2	-1.0218	1.55e-09
FXYD3	-1.28671	1.63e-09
SLC7A5	1.04206	1.91e-09
SCNN1B	-1.50278	1.95e-09
TRNP1	-1.06598	2e-09
MMP3	1.19181	2.11e-09
SDCBP2	-1.00439	2.19e-09
SOX9	1.09856	2.37e-09
CCL21	1.43635	2.7e-09
GPR110	-1.01192	3.08e-09
TMPRSS4	-1.3775	3.1e-09
ACER2	-1.2624	3.17e-09
TMEM97	-1.1553	3.26e-09
CDA	1.11736	3.41e-09
PNCK	-1.08368	3.7e-09
PADI3	-1.8436	3.99e-09
BCAM	-1.01833	4.06e-09
RBP1	1.00773	4.2e-09
HLA-DRB5	1.34491	4.31e-09
FGFR3	-1.5349	4.35e-09
IFITM1	1.18626	4.66e-09
POF1B	-1.0496	4.85e-09
KRT14	2.48753	5.15e-09
PSMB9	1.09791	5.88e-09
CCL13	1.00572	6.04e-09
CAMK2N1	-1.13717	6.26e-09
FBLN2	1.06527	6.85e-09
IL2RG	1.02896	7.17e-09
PCP4L1	-1.44954	7.58e-09
TMPRSS2	-1.361	8.62e-09
PTGIS	1.08098	9.8e-09
IGHV1-18	1.70799	1e-08
PRR15	-1.10902	1.01e-08
GZMA	1.10716	1.07e-08
IGHV4-39	1.70159	1.23e-08
RARRES3	1.29491	1.29e-08
C15orf48	1.25997	1.38e-08
SPTSSB	-1.39381	1.47e-08
CHP2	-1.07443	1.8e-08
MSMB	-1.34613	1.99e-08
REEP6	-1.09921	2e-08
MMP28	-1.1024	2.1e-08
SULT2A1	-1.09032	2.34e-08
EEF1A2	-1.58112	2.47e-08
IGHG3	1.78545	2.66e-08
IGKV3-11	1.70071	2.92e-08
IGHM	1.65631	3.64e-08
RP11-54H7.4	1.02763	3.67e-08
IGLV1-40	1.68096	3.71e-08
BAMBI	-1.31425	3.77e-08
SERPINB2	1.1876	3.89e-08
AKR1C2	-1.49864	4.07e-08
CAPNS2	-1.41425	4.42e-08
SYT8	-1.42581	4.45e-08
PI3	2.27394	4.45e-08
IGLV3-21	1.79303	4.6e-08
FMO9P	-1.28618	4.92e-08
IGKV1-5	1.73545	6e-08
IGHV3-23	1.66592	6.72e-08
PM20D1	-1.64278	7.41e-08
IGKC	1.89533	7.44e-08
OLR1	1.05375	8.51e-08
IGHV3-21	1.44074	9.73e-08
RARRES2	1.04302	1.08e-07
IGLC2	1.75021	1.16e-07
IGKV4-1	1.68109	1.28e-07
HLA-DQA2	1.12192	1.3e-07
COMP	1.39853	1.34e-07
IGLV2-14	1.61069	1.36e-07
IGHG4	1.8126	1.37e-07
PPP1R14C	1.05079	1.4e-07
IGHV1-69-2	1.3661	1.42e-07
PTHLH	1.1595	1.51e-07
CTGF	1.08548	1.57e-07
TNNI2	-1.43611	1.58e-07
SERPINE1	1.10145	1.63e-07
IGHV3-33	1.29255	1.69e-07
IGKV3-15	1.45878	1.87e-07
ALDH1A1	1.13073	1.9e-07
IGHV5-51	1.55909	1.93e-07
LAMA3	1.07845	2.37e-07
BMP3	-1.06942	2.47e-07
CXCL11	1.18142	2.49e-07
GRHL3	-1.22086	2.65e-07
CXCL13	1.21135	2.92e-07
IGLV6-57	1.37406	2.99e-07
RRAD	1.07355	3e-07
IGHV1-2	1.35097	3.35e-07
IGHV4-59	1.36775	4.4e-07
IGHV3-15	1.35427	4.84e-07
IGHV3-30	1.35985	5.06e-07
TM4SF1	1.00879	5.3e-07
IGFBP3	-1.13179	5.39e-07
HAS3	-1.06057	5.8e-07
ACTG2	1.37613	5.86e-07
IGKV1-17	1.26427	5.94e-07
ACTA2	1.03544	6.03e-07
IGLV3-25	1.55174	6.82e-07
GJB2	1.28423	7.67e-07
C3	1.1461	8.43e-07
MYL9	1.00867	8.45e-07
IGHGP	1.32734	9.21e-07
S100A9	1.75745	1.05e-06
G0S2	1.01627	1.07e-06
IGLV3-19	1.53875	1.14e-06
IL20RB	1.04706	1.2e-06
IGLC3	1.62952	1.23e-06
IGKV1-27	1.10463	1.29e-06
IGHG2	1.64436	1.37e-06
KLK6	1.11818	1.45e-06
S100A4	-1.04423	1.67e-06
CNN1	1.25903	1.68e-06
IGLV2-23	1.41563	1.82e-06
DES	1.84282	1.96e-06
KRT20	-1.89559	1.97e-06
IGLV3-1	1.32908	1.99e-06
IDO1	1.10978	2e-06
LAMC2	1.15551	2.11e-06
IGLV2-11	1.30298	2.14e-06
IGLV1-47	1.32623	2.25e-06
MSLN	1.06024	2.32e-06
MT1E	1.05719	2.65e-06
KRT6C	1.12194	3.25e-06
IGLV1-51	1.30994	3.76e-06
PDZK1IP1	1.25621	3.8e-06
SPRR2A	1.27291	4.15e-06
S100A7	1.92159	4.44e-06
SAA1	1.35593	4.88e-06
IGLV1-44	1.35224	5.48e-06
FGFBP1	1.38903	5.59e-06
IGHJ3	1.03673	5.91e-06
KLK5	1.09488	5.98e-06
IFI6	1.07198	6.56e-06
IGHV4-34	1.18323	6.93e-06
SPRR1B	1.59524	7.45e-06
SERPINB4	1.15119	7.83e-06
CXCL1	1.10567	1.44e-05
AKR1C3	-1.07427	1.62e-05
IGKV1-9	1.17994	1.62e-05
SPRR2D	1.05174	1.66e-05
MGP	1.00622	1.67e-05
IGLL5	1.04406	2.02e-05
FABP4	-1.40265	2.1e-05
IGHV1-46	1.02096	2.24e-05
IGHV4-31	1.00927	2.36e-05
IGHV1-24	1.1134	2.72e-05
INA	-1.00891	2.97e-05
IVL	-1.18103	3.93e-05
CYP24A1	-1.05868	4.08e-05
CDKN2A	1.08135	4.56e-05
CTA-384D8.31	1.31313	4.75e-05
CALML5	1.40164	5.49e-05
KRT16	1.48587	6.17e-05
KLHDC7B	1.17054	7.21e-05
KRT5	1.83481	7.48e-05
MAGEA3	1.08515	8.28e-05
IGLV4-69	1.04519	9.18e-05
FXYD4	-1.02345	9.59e-05
IGHV3-11	1.02256	0.000100332
RHCG	1.01034	0.000101572
CRH	-1.18457	0.000122559
PLA2G2A	-1.18302	0.000129741
IGLV3-10	1.05742	0.000141069
DSC3	1.09504	0.000149605
UPK3B	-1.14032	0.000230517
SERPINB3	1.13131	0.000452398
IGHA1	1.25016	0.000585533
MAL	-1.01663	0.000681513
KRTDAP	1.06638	0.000843299
KRT13	-1.19122	0.0158426
UPK1B	-1.00128	0.0181757
IGF2	-1.0205	0.0247281
